# Supplementary material for: Ligand-dependent enhancer activation indirectly modulates non-target promoters in a chromatin domain
Source: eLife. 2026 Jul 7;13:RP102417. doi: 10.7554/eLife.102417 (PMC13341115; doi:10.7554/eLife.102417)
Supplement: Figure 1—source data 1. [file elife-102417-fig1-data1.xlsx]

## Sheet: Sheet1
Fig1B			R1	R1			R2	R2			R3	R3			R4	R4
	Treatment		TFF1 US	TFF3 US			TFF1 US	TFF3 US			TFF1 US	TFF3 US			TFF1 US	TFF3 US
	ETOH		1	1			1	1			1	1			1	1
	1 HR E2		7.05051	1.56225			9.0428	1.77012			9.28926	2.28272			10.936	2.11863
	3 HR E2		4.33026	1.18829			5.27189	1.52692			3.38809	1.10485			4.63517	1.84241
