# Supplementary material for: Ligand-dependent enhancer activation indirectly modulates non-target promoters in a chromatin domain
Source: eLife. 2026 Jul 7;13:RP102417. doi: 10.7554/eLife.102417 (PMC13341115; doi:10.7554/eLife.102417)
Supplement: Figure 2—figure supplement 1—source data 1. [file elife-102417-fig2-figsupp1-data1.xlsx]

## Sheet: TFF1
	no of sites 1	Uninduced	1HR	3HR		no of sites 2	Uninduced	1HR	3HR
	20210801	59.2	29.8	38.98		20210801	20.26	32	27.96
	20210827	79.86	39.91	49		20210827	16.6	37.5	33.5
	20210929	65.5	34	33.1		20210929	25.5	39	44
	MEAN	68.1867	34.57	40.36		MEAN	20.7867	36.1667	35.1533
	STDEV	10.5888	5.07905	8.03933		STDEV	4.47331	3.68556	8.14681
	SEM	6.11344	2.93239	4.64151		SEM	2.58267	2.12786	4.70356
	no of sites 3	Uninduced	1HR	3HR		no of sites 4	Uninduced	1HR	3HR
	20210801	10.52	20.89	19.49		20210801	0	11.94	9.32
	20210827	3.47	15.72	12.64		20210827	0	6.04	3.16
	20210929	8	20	15.4		20210929	1	5.32	4.4
	MEAN	7.33	18.87	15.8433		MEAN	0.333333	7.76667	5.62667
	STDEV	3.57244	2.76404	3.44645		STDEV	0.57735	3.6321	3.25806
	SEM	2.06255	1.59582	1.98981		SEM	0.333333	2.09699	1.88104
	no of sites >4	Uninduced	1HR	3HR
	20210801	0	0.0005	4.23
	20210827	0	0.8	1.58
	20210929	0	1.18	2.76
	MEAN	0	0.660167	2.85667
	STDEV	0	0.602055	1.32764
	SEM	0	0.347597	0.766514

## Sheet: TFF3
	no of sites 1	Uninduced	1HR	3HR		no of sites 2	Uninduced	1HR	3HR
	20210801	84.3	79.1	68.2		20210801	12.5	19.79	19.6
	20210827	76.9	79	72		20210827	13.8	15.11	18.98
	20210929	76.74	76.1	77		20210929	17.8	17.8	18.5
	MEAN	79.3133	78.0667	72.4		MEAN	14.7	17.5667	19.0267
	STDEV	4.31932	1.70392	4.41362		STDEV	2.76225	2.34871	0.551483
	SEM	2.49376	0.983757	2.5482		SEM	1.59478	1.35603	0.318399
	no of sites 3	Uninduced	1HR	3HR		no of sites 4	Uninduced	1HR	3HR
	20210801	3.12	1.04	9.34		20210801	0	0	2.8
	20210827	3.07	4.65	5.06		20210827	3.07	0	2.53
	20210929	3.1	3.57	3.6		20210929	1.5	1.19	2.06
	MEAN	3.09667	3.08667	6		MEAN	1.52333	0.396667	2.46333
	STDEV	0.0251661	1.8529	2.98322		STDEV	1.53513	0.687047	0.374477
	SEM	0.0145297	1.06977	1.72236		SEM	0.886309	0.396667	0.216205
	no of sites >4	Uninduced	1HR	3HR
	20210801	0	0	0
	20210827	3.07	1.16	0.63
	20210929	0.77	1.19	0
	MEAN	1.28	0.783333	0.21
	STDEV	1.59728	0.678552	0.363731
	SEM	0.922189	0.391762	0.21
