# Supplementary material for: Ligand-dependent enhancer activation indirectly modulates non-target promoters in a chromatin domain
Source: eLife. 2026 Jul 7;13:RP102417. doi: 10.7554/eLife.102417 (PMC13341115; doi:10.7554/eLife.102417)
Supplement: Figure 2—figure supplement 2—source data 1. [file elife-102417-fig2-figsupp2-data1.xlsx]

## Sheet: Uninduced-TFF1
		total INTFF3	total EXTFF3	total exonic minus total intronic	ratio total/total	ratio total intronic/absolute exonic
		9	98	89	0.0918367	0.101124
		34	143	109	0.237762	0.311927
		1	51	50	0.0196078	0.02
		4	11	7	0.363636	0.571429
		1	60	59	0.0166667	0.0169492
		0	111	111	0	0
		7	122	115	0.057377	0.0608696
		0	107	107	0	0
		1	100	99	0.01	0.010101
		3	9	6	0.333333	0.5
		7	12	5	0.583333	1.4
		0	15	15	0	0
		2	9	7	0.222222	0.285714
		1	3	2	0.333333	0.5
		11	35	24	0.314286	0.458333
		21	42	21	0.5	1
		11	37	26	0.297297	0.423077
		2	19	17	0.105263	0.117647
		2	17	15	0.117647	0.133333
		2	30	28	0.0666667	0.0714286
		0	5	5	0	0
		1	3	2	0.333333	0.5
		0	41	41	0	0
		17	69	52	0.246377	0.326923
		5	89	84	0.0561798	0.0595238
		2	51	49	0.0392157	0.0408163
		5	61	56	0.0819672	0.0892857
		1	35	34	0.0285714	0.0294118
		0	157	157	0	0
		1	21	20	0.047619	0.05
		0	24	24	0	0
		2	20	18	0.1	0.111111
		1	10	9	0.1	0.111111
		0	5	5	0	0
		1	5	4	0.2	0.25
		1	31	30	0.0322581	0.0333333
		0	17	17	0	0
		5	112	107	0.0446429	0.046729
		2	19	17	0.105263	0.117647
		0	4	4	0	0
		1	40	39	0.025	0.025641
		1	24	23	0.0416667	0.0434783
		2	10	8	0.2	0.25
		0	10	10	0	0
		0	20	20	0	0
		0	9	9	0	0
		3	17	14	0.176471	0.214286
		0	11	11	0	0
		0	3	3	0	0
		2	5	3	0.4	0.666667
		0	1	1	0	0
		1	16	15	0.0625	0.0666667
		0	7	7	0	0
		22	30	8	0.733333	2.75
		6	31	25	0.193548	0.24
		1	11	10	0.0909091	0.1
		2	14	12	0.142857	0.166667
		9	12	3	0.75	3
		0	11	11	0	0
		0	14	14	0	0
		0	19	19	0	0
		0	18	18	0	0
		0	14	14	0	0
		1	18	17	0.0555556	0.0588235
		0	1	1	0	0
		3	18	15	0.166667	0.2
		0	35	35	0	0
		1	35	34	0.0285714	0.0294118
		0	8	8	0	0
		0	18	18	0	0
		0	9	9	0	0
		1	7	6	0.142857	0.166667
		11	54	43	0.203704	0.255814
		12	25	13	0.48	0.923077
		10	32	22	0.3125	0.454545
		21	26	5	0.807692	4.2
		5	45	40	0.111111	0.125
		1	52	51	0.0192308	0.0196078
		0	45	45	0	0
		4	53	49	0.0754717	0.0816327
		1	15	14	0.0666667	0.0714286
		0	44	44	0	0
		0	13	13	0	0
		25	73	48	0.342466	0.520833
		11	21	10	0.52381	1.1
		6	65	59	0.0923077	0.101695
		4	22	18	0.181818	0.222222
		0	9	9	0	0
		0	5	5	0	0
		0	2	2	0	0
		0	14	14	0	0
		3	88	85	0.0340909	0.0352941
		0	13	13	0	0
		4	71	67	0.056338	0.0597015
		1	48	47	0.0208333	0.0212766
		0	39	39	0	0
		0	70	70	0	0
		3	108	105	0.0277778	0.0285714
		5	21	16	0.238095	0.3125
		3	24	21	0.125	0.142857
		0	1	1	0	0
		1	4	3	0.25	0.333333
		0	66	66	0	0
		2	23	21	0.0869565	0.0952381
		2	15	13	0.133333	0.153846
		11	60	49	0.183333	0.22449
		5	42	37	0.119048	0.135135
		0	7	7	0	0
		5	72	67	0.0694444	0.0746269
		6	25	19	0.24	0.315789
		0	15	15	0	0
		0	3	3	0	0
		0	4	4	0	0
		4	18	14	0.222222	0.285714
		29	83	54	0.349398	0.537037
		16	87	71	0.183908	0.225352
		6	51	45	0.117647	0.133333
		7	35	28	0.2	0.25
		0	19	19	0	0
		0	11	11	0	0
		0	12	12	0	0
		1	8	7	0.125	0.142857
		3	22	19	0.136364	0.157895
		4	20	16	0.2	0.25
		1	55	54	0.0181818	0.0185185
		0	76	76	0	0
		13	101	88	0.128713	0.147727
		10	79	69	0.126582	0.144928
		2	65	63	0.0307692	0.031746
		0	12	12	0	0
		0	4	4	0	0
		0	26	26	0	0
		8	143	135	0.0559441	0.0592593
		12	106	94	0.113208	0.12766
		7	98	91	0.0714286	0.0769231
		0	77	77	0	0
		41	135	94	0.303704	0.43617
		1	99	98	0.010101	0.0102041
		0	44	44	0	0
		0	34	34	0	0
		0	88	88	0	0
		0	79	79	0	0
		1	89	88	0.011236	0.0113636
		0	15	15	0	0
		0	23	23	0	0
		0	19	19	0	0
		1	98	97	0.0102041	0.0103093
		0	3	3	0	0
		0	11	11	0	0
		2	58	56	0.0344828	0.0357143
		1	22	21	0.0454545	0.047619
		0	17	17	0	0
		0	22	22	0	0
		1	8	7	0.125	0.142857
		0	1	1	0	0
		4	64	60	0.0625	0.0666667
		1	22	21	0.0454545	0.047619
		0	22	22	0	0
		4	65	61	0.0615385	0.0655738
		4	60	56	0.0666667	0.0714286
		8	43	35	0.186047	0.228571
		1	26	25	0.0384615	0.04
		2	15	13	0.133333	0.153846
		1	39	38	0.025641	0.0263158
		6	69	63	0.0869565	0.0952381
		11	35	24	0.314286	0.458333
		0	17	17	0	0
		1	35	34	0.0285714	0.0294118
		2	10	8	0.2	0.25
		1	4	3	0.25	0.333333
		0	3	3	0	0
		0	3	3	0	0
		1	7	6	0.142857	0.166667
		4	22	18	0.181818	0.222222
		0	7	7	0	0
		1	8	7	0.125	0.142857
		2	11	9	0.181818	0.222222
		1	4	3	0.25	0.333333
		2	17	15	0.117647	0.133333
		0	7	7	0	0
		0	4	4	0	0
		2	37	35	0.0540541	0.0571429
		4	39	35	0.102564	0.114286
		6	33	27	0.181818	0.222222
		1	34	33	0.0294118	0.030303
		21	197	176	0.106599	0.119318
		17	69	52	0.246377	0.326923
		0	41	41	0	0
		8	44	36	0.181818	0.222222
		4	22	18	0.181818	0.222222
		3	36	33	0.0833333	0.0909091
		0	15	15	0	0
		8	42	34	0.190476	0.235294
		0	11	11	0	0
		6	17	11	0.352941	0.545455
		10	20	10	0.5	1
		12	43	31	0.27907	0.387097
		5	28	23	0.178571	0.217391
		2	34	32	0.0588235	0.0625
		3	25	22	0.12	0.136364
		12	45	33	0.266667	0.363636
		0	7	7	0	0
		7	25	18	0.28	0.388889
		6	37	31	0.162162	0.193548
		0	10	10	0	0
		0	25	25	0	0
		0	35	35	0	0
		8	24	16	0.333333	0.5
		5	29	24	0.172414	0.208333
		5	36	31	0.138889	0.16129
		1	30	29	0.0333333	0.0344828
	mean				0.106395	0.179832

## Sheet: 1hr-TFF1
		total INTFF3	total EXTFF3	total exonic minus total intronic	ratio total/total	ratio total intronic/absolute exonic
		8	54	46	0.148148	0.173913
		5	59	54	0.0847458	0.0925926
		21	143	122	0.146853	0.172131
		35	102	67	0.343137	0.522388
		3	50	47	0.06	0.0638298
		0	50	50	0	0
		0	47	47	0	0
		5	53	48	0.0943396	0.104167
		0	108	108	0	0
		22	121	99	0.181818	0.222222
		1	25	24	0.04	0.0416667
		0	5	5	0	0
		8	46	38	0.173913	0.210526
		5	27	22	0.185185	0.227273
		5	51	46	0.0980392	0.108696
		30	111	81	0.27027	0.37037
		3	106	103	0.0283019	0.0291262
		28	196	168	0.142857	0.166667
		0	66	66	0	0
		9	56	47	0.160714	0.191489
		3	53	50	0.0566038	0.06
		1	65	64	0.0153846	0.015625
		4	191	187	0.0209424	0.0213904
		17	38	21	0.447368	0.809524
		6	26	20	0.230769	0.3
		7	75	68	0.0933333	0.102941
		0	14	14	0	0
		3	19	16	0.157895	0.1875
		0	69	69	0	0
		32	194	162	0.164948	0.197531
		18	205	187	0.0878049	0.0962567
		10	235	225	0.0425532	0.0444444
		7	111	104	0.0630631	0.0673077
		7	41	34	0.170732	0.205882
		1	13	12	0.0769231	0.0833333
		0	46	46	0	0
		0	44	44	0	0
		3	7	4	0.428571	0.75
		27	48	21	0.5625	1.28571
		15	43	28	0.348837	0.535714
		6	37	31	0.162162	0.193548
		0	52	52	0	0
		0	3	3	0	0
		0	32	32	0	0
		30	32	2	0.9375	15
		0	15	15	0	0
		1	2	1	0.5	1
		0	31	31	0	0
		17	345	328	0.0492754	0.0518293
		0	44	44	0	0
		1	54	53	0.0185185	0.0188679
		19	72	53	0.263889	0.358491
		9	47	38	0.191489	0.236842
		0	42	42	0	0
		14	104	90	0.134615	0.155556
		4	51	47	0.0784314	0.0851064
		0	40	40	0	0
		0	33	33	0	0
		2	116	114	0.0172414	0.0175439
		1	35	34	0.0285714	0.0294118
		3	35	32	0.0857143	0.09375
		6	33	27	0.181818	0.222222
		7	26	19	0.269231	0.368421
		23	121	98	0.190083	0.234694
		28	96	68	0.291667	0.411765
		14	77	63	0.181818	0.222222
		5	58	53	0.0862069	0.0943396
		1	4	3	0.25	0.333333
		0	5	5	0	0
		5	48	43	0.104167	0.116279
		36	144	108	0.25	0.333333
		0	7	7	0	0
		1	52	51	0.0192308	0.0196078
		0	11	11	0	0
		0	11	11	0	0
		0	41	41	0	0
		31	141	110	0.219858	0.281818
		18	156	138	0.115385	0.130435
		17	135	118	0.125926	0.144068
		0	70	70	0	0
		0	64	64	0	0
		0	96	96	0	0
		6	108	102	0.0555556	0.0588235
		16	178	162	0.0898876	0.0987654
		0	123	123	0	0
		6	113	107	0.0530973	0.0560748
		0	123	123	0	0
		0	59	59	0	0
		2	141	139	0.0141844	0.0143885
		2	96	94	0.0208333	0.0212766
		7	267	260	0.0262172	0.0269231
		0	27	27	0	0
		0	10	10	0	0
		24	38	14	0.631579	1.71429
		6	14	8	0.428571	0.75
		2	17	15	0.117647	0.133333
		9	34	25	0.264706	0.36
		5	23	18	0.217391	0.277778
		3	57	54	0.0526316	0.0555556
		4	53	49	0.0754717	0.0816327
		3	6	3	0.5	1
		2	15	13	0.133333	0.153846
		3	35	32	0.0857143	0.09375
		5	26	21	0.192308	0.238095
		2	8	6	0.25	0.333333
		3	120	117	0.025	0.025641
		1	103	102	0.00970874	0.00980392
		21	164	143	0.128049	0.146853
		25	235	210	0.106383	0.119048
		12	133	121	0.0902256	0.0991736
		2	67	65	0.0298507	0.0307692
		2	57	55	0.0350877	0.0363636
		2	161	159	0.0124224	0.0125786
		1	46	45	0.0217391	0.0222222
		2	60	58	0.0333333	0.0344828
		23	143	120	0.160839	0.191667
		0	12	12	0	0
		2	6	4	0.333333	0.5
		9	102	93	0.0882353	0.0967742
		0	10	10	0	0
		0	3	3	0	0
		1	20	19	0.05	0.0526316
		0	7	7	0	0
		5	87	82	0.0574713	0.0609756
		3	60	57	0.05	0.0526316
		9	98	89	0.0918367	0.101124
		0	77	77	0	0
		2	23	21	0.0869565	0.0952381
		22	80	58	0.275	0.37931
		21	55	34	0.381818	0.617647
		7	42	35	0.166667	0.2
		3	67	64	0.0447761	0.046875
		1	53	52	0.0188679	0.0192308
		12	41	29	0.292683	0.413793
		0	68	68	0	0
		0	91	91	0	0
		0	18	18	0	0
		0	41	41	0	0
		0	55	55	0	0
		14	145	131	0.0965517	0.10687
		2	121	119	0.0165289	0.0168067
		2	135	133	0.0148148	0.0150376
		3	67	64	0.0447761	0.046875
		11	89	78	0.123596	0.141026
		8	95	87	0.0842105	0.091954
		18	67	49	0.268657	0.367347
		1	6	5	0.166667	0.2
		1	4	3	0.25	0.333333
		2	33	31	0.0606061	0.0645161
		0	43	43	0	0
		0	29	29	0	0
		21	55	34	0.381818	0.617647
		1	15	14	0.0666667	0.0714286
		1	57	56	0.0175439	0.0178571
		25	241	216	0.103734	0.115741
		29	142	113	0.204225	0.256637
		2	76	74	0.0263158	0.027027
		6	101	95	0.0594059	0.0631579
		1	55	54	0.0181818	0.0185185
		43	86	43	0.5	1
		0	7	7	0	0
		0	14	14	0	0
		0	26	26	0	0
		1	8	7	0.125	0.142857
		14	102	88	0.137255	0.159091
		0	45	45	0	0
		0	55	55	0	0
		6	34	28	0.176471	0.214286
		8	19	11	0.421053	0.727273
		6	21	15	0.285714	0.4
		3	20	17	0.15	0.176471
		9	123	114	0.0731707	0.0789474
		2	117	115	0.017094	0.0173913
		3	77	74	0.038961	0.0405405
		0	89	89	0	0
		12	95	83	0.126316	0.144578
		10	47	37	0.212766	0.27027
		0	25	25	0	0
		2	50	48	0.04	0.0416667
		2	40	38	0.05	0.0526316
		1	108	107	0.00925926	0.00934579
		1	60	59	0.0166667	0.0169492
		0	34	34	0	0
		17	115	98	0.147826	0.173469
		0	42	42	0	0
		3	32	29	0.09375	0.103448
		2	128	126	0.015625	0.015873
		14	61	47	0.229508	0.297872
		23	57	34	0.403509	0.676471
		1	21	20	0.047619	0.05
		1	57	56	0.0175439	0.0178571
		0	69	69	0	0
		0	67	67	0	0
		2	76	74	0.0263158	0.027027
		19	156	137	0.121795	0.138686
		0	10	10	0	0
		0	51	51	0	0
		9	52	43	0.173077	0.209302
		8	75	67	0.106667	0.119403
		0	22	22	0	0
		1	6	5	0.166667	0.2
		6	39	33	0.153846	0.181818
		1	37	36	0.027027	0.0277778
		1	74	73	0.0135135	0.0136986
		18	136	118	0.132353	0.152542
		4	156	152	0.025641	0.0263158
		7	188	181	0.037234	0.038674
		1	112	111	0.00892857	0.00900901
		0	11	11	0	0
		1	12	11	0.0833333	0.0909091
		12	55	43	0.218182	0.27907
	mean				0.105748	0.214975

## Sheet: 3hr-TFF1
		total INTFF3	total EXTFF3	total exonic minus total intronic	ratio total/total	ratio total intronic/absolute exonic
		8	10	2	0.8	4
		18	55	37	0.327273	0.486486
		4	9	5	0.444444	0.8
		4	9	5	0.444444	0.8
		1	25	24	0.04	0.0416667
		35	126	91	0.277778	0.384615
		10	25	15	0.4	0.666667
		19	51	32	0.372549	0.59375
		2	8	6	0.25	0.333333
		5	49	44	0.102041	0.113636
		1	22	21	0.0454545	0.047619
		2	7	5	0.285714	0.4
		7	44	37	0.159091	0.189189
		3	10	7	0.3	0.428571
		19	52	33	0.365385	0.575758
		8	22	14	0.363636	0.571429
		28	178	150	0.157303	0.186667
		52	247	195	0.210526	0.266667
		32	171	139	0.187135	0.230216
		6	133	127	0.0451128	0.0472441
		1	41	40	0.0243902	0.025
		16	156	140	0.102564	0.114286
		11	65	54	0.169231	0.203704
		27	149	122	0.181208	0.221311
		15	198	183	0.0757576	0.0819672
		1	58	57	0.0172414	0.0175439
		24	62	38	0.387097	0.631579
		49	77	28	0.636364	1.75
		21	32	11	0.65625	1.90909
		5	40	35	0.125	0.142857
		11	41	30	0.268293	0.366667
		1	11	10	0.0909091	0.1
		0	12	12	0	0
		1	32	31	0.03125	0.0322581
		0	6	6	0	0
		0	34	34	0	0
		3	74	71	0.0405405	0.0422535
		0	11	11	0	0
		1	22	21	0.0454545	0.047619
		1	22	21	0.0454545	0.047619
		0	22	22	0	0
		32	44	12	0.727273	2.66667
		29	33	4	0.878788	7.25
		18	45	27	0.4	0.666667
		7	44	37	0.159091	0.189189
		0	12	12	0	0
		0	10	10	0	0
		2	52	50	0.0384615	0.04
		1	54	53	0.0185185	0.0188679
		27	44	17	0.613636	1.58824
		31	60	29	0.516667	1.06897
		16	108	92	0.148148	0.173913
		23	150	127	0.153333	0.181102
		1	25	24	0.04	0.0416667
		1	419	418	0.00238663	0.00239234
		18	44	26	0.409091	0.692308
		1	5	4	0.2	0.25
		19	20	1	0.95	19
		3	53	50	0.0566038	0.06
		22	39	17	0.564103	1.29412
		35	40	5	0.875	7
		7	23	16	0.304348	0.4375
		2	21	19	0.0952381	0.105263
		66	115	49	0.573913	1.34694
		1	19	18	0.0526316	0.0555556
		32	39	7	0.820513	4.57143
		19	60	41	0.316667	0.463415
		19	23	4	0.826087	4.75
		0	34	34	0	0
		14	56	42	0.25	0.333333
		0	10	10	0	0
		15	17	2	0.882353	7.5
		1	6	5	0.166667	0.2
		23	102	79	0.22549	0.291139
		0	7	7	0	0
		26	30	4	0.866667	6.5
		31	47	16	0.659574	1.9375
		11	45	34	0.244444	0.323529
		21	80	59	0.2625	0.355932
		43	96	53	0.447917	0.811321
		1	20	19	0.05	0.0526316
		3	14	11	0.214286	0.272727
		63	125	62	0.504	1.01613
		2	68	66	0.0294118	0.030303
		1	43	42	0.0232558	0.0238095
		19	116	97	0.163793	0.195876
		26	82	56	0.317073	0.464286
		11	44	33	0.25	0.333333
		12	144	132	0.0833333	0.0909091
		3	51	48	0.0588235	0.0625
		1	23	22	0.0434783	0.0454545
		22	48	26	0.458333	0.846154
		1	51	50	0.0196078	0.02
		1	2	1	0.5	1
		2	15	13	0.133333	0.153846
		0	7	7	0	0
		1	10	9	0.1	0.111111
		3	16	13	0.1875	0.230769
		1	11	10	0.0909091	0.1
		7	20	13	0.35	0.538462
		1	3	2	0.333333	0.5
		1	2	1	0.5	1
		2	10	8	0.2	0.25
		1	4	3	0.25	0.333333
		54	112	58	0.482143	0.931034
		15	115	100	0.130435	0.15
		16	66	50	0.242424	0.32
		23	51	28	0.45098	0.821429
		30	198	168	0.151515	0.178571
		16	132	116	0.121212	0.137931
		29	154	125	0.188312	0.232
		11	216	205	0.0509259	0.0536585
		8	45	37	0.177778	0.216216
		25	47	22	0.531915	1.13636
		9	106	97	0.0849057	0.0927835
		32	92	60	0.347826	0.533333
		28	40	12	0.7	2.33333
		92	141	49	0.652482	1.87755
		39	65	26	0.6	1.5
		22	66	44	0.333333	0.5
		17	198	181	0.0858586	0.0939227
		33	167	134	0.197605	0.246269
		2	34	32	0.0588235	0.0625
		16	99	83	0.161616	0.192771
		7	39	32	0.179487	0.21875
		8	56	48	0.142857	0.166667
		22	133	111	0.165414	0.198198
		8	40	32	0.2	0.25
		0	8	8	0	0
		8	26	18	0.307692	0.444444
		2	38	36	0.0526316	0.0555556
		22	42	20	0.52381	1.1
		34	69	35	0.492754	0.971429
		1	55	54	0.0181818	0.0185185
		3	46	43	0.0652174	0.0697674
		15	82	67	0.182927	0.223881
		3	96	93	0.03125	0.0322581
		53	293	240	0.180887	0.220833
		1	37	36	0.027027	0.0277778
		2	41	39	0.0487805	0.0512821
		2	25	23	0.08	0.0869565
		29	38	9	0.763158	3.22222
		28	50	22	0.56	1.27273
		1	35	34	0.0285714	0.0294118
		3	42	39	0.0714286	0.0769231
		1	37	36	0.027027	0.0277778
		23	25	2	0.92	11.5
		6	12	6	0.5	1
		14	34	20	0.411765	0.7
		1	31	30	0.0322581	0.0333333
		1	6	5	0.166667	0.2
		5	6	1	0.833333	5
		3	5	2	0.6	1.5
		41	69	28	0.594203	1.46429
		4	59	55	0.0677966	0.0727273
		0	3	3	0	0
		5	43	38	0.116279	0.131579
		1	32	31	0.03125	0.0322581
		0	4	4	0	0
		4	32	28	0.125	0.142857
		2	16	14	0.125	0.142857
		0	1	1	0	0
		4	7	3	0.571429	1.33333
		0	3	3	0	0
		2	11	9	0.181818	0.222222
		19	27	8	0.703704	2.375
		2	4	2	0.5	1
		0	9	9	0	0
		5	15	10	0.333333	0.5
		20	50	30	0.4	0.666667
		1	25	24	0.04	0.0416667
		2	39	37	0.0512821	0.0540541
		1	134	133	0.00746269	0.0075188
		30	66	36	0.454545	0.833333
		43	90	47	0.477778	0.914894
		1	64	63	0.015625	0.015873
		19	80	61	0.2375	0.311475
		11	51	40	0.215686	0.275
		17	78	61	0.217949	0.278689
		22	52	30	0.423077	0.733333
		16	57	41	0.280702	0.390244
		1	83	82	0.0120482	0.0121951
		19	76	57	0.25	0.333333
		32	78	46	0.410256	0.695652
		12	87	75	0.137931	0.16
		3	43	40	0.0697674	0.075
		22	62	40	0.354839	0.55
		12	58	46	0.206897	0.26087
		1	123	122	0.00813008	0.00819672
		18	69	51	0.26087	0.352941
		1	59	58	0.0169492	0.0172414
		19	46	27	0.413043	0.703704
		58	77	19	0.753247	3.05263
		5	52	47	0.0961538	0.106383
		21	65	44	0.323077	0.477273
		4	52	48	0.0769231	0.0833333
		19	79	60	0.240506	0.316667
		10	76	66	0.131579	0.151515
		22	77	55	0.285714	0.4
		22	63	41	0.349206	0.536585
		15	37	22	0.405405	0.681818
		35	62	27	0.564516	1.2963
		7	149	142	0.0469799	0.0492958
		1	47	46	0.0212766	0.0217391
		11	261	250	0.0421456	0.044
		2	154	152	0.012987	0.0131579
		28	138	110	0.202899	0.254545
		7	178	171	0.0393258	0.0409357
		3	208	205	0.0144231	0.0146341
		7	107	100	0.0654206	0.07
		14	70	56	0.2	0.25
		41	113	72	0.362832	0.569444
		17	158	141	0.107595	0.120567
		14	134	120	0.104478	0.116667
		25	47	22	0.531915	1.13636
	mean				0.249932	0.753289

## Sheet: Uninduced-TFF3
		total INTFF3	total EXTFF3	total exonic minus total intronic	ratio total/total	ratio total intronic/absolute exonic
		9	98	89	0.0918367	0.101124
		34	143	109	0.237762	0.311927
		1	51	50	0.0196078	0.02
		4	11	7	0.363636	0.571429
		1	60	59	0.0166667	0.0169492
		0	111	111	0	0
		7	122	115	0.057377	0.0608696
		0	107	107	0	0
		1	100	99	0.01	0.010101
		3	9	6	0.333333	0.5
		7	12	5	0.583333	1.4
		0	15	15	0	0
		2	9	7	0.222222	0.285714
		1	3	2	0.333333	0.5
		11	35	24	0.314286	0.458333
		21	42	21	0.5	1
		11	37	26	0.297297	0.423077
		2	19	17	0.105263	0.117647
		2	17	15	0.117647	0.133333
		2	30	28	0.0666667	0.0714286
		0	5	5	0	0
		1	3	2	0.333333	0.5
		0	41	41	0	0
		17	69	52	0.246377	0.326923
		5	89	84	0.0561798	0.0595238
		2	51	49	0.0392157	0.0408163
		5	61	56	0.0819672	0.0892857
		1	35	34	0.0285714	0.0294118
		0	157	157	0	0
		1	21	20	0.047619	0.05
		0	24	24	0	0
		2	20	18	0.1	0.111111
		1	10	9	0.1	0.111111
		0	5	5	0	0
		1	5	4	0.2	0.25
		1	31	30	0.0322581	0.0333333
		0	17	17	0	0
		5	112	107	0.0446429	0.046729
		2	19	17	0.105263	0.117647
		0	4	4	0	0
		1	40	39	0.025	0.025641
		1	24	23	0.0416667	0.0434783
		2	10	8	0.2	0.25
		0	10	10	0	0
		0	20	20	0	0
		0	9	9	0	0
		3	17	14	0.176471	0.214286
		0	11	11	0	0
		0	3	3	0	0
		2	5	3	0.4	0.666667
		0	1	1	0	0
		1	16	15	0.0625	0.0666667
		0	7	7	0	0
		22	30	8	0.733333	2.75
		6	31	25	0.193548	0.24
		1	11	10	0.0909091	0.1
		2	14	12	0.142857	0.166667
		9	12	3	0.75	3
		0	11	11	0	0
		0	14	14	0	0
		0	19	19	0	0
		0	18	18	0	0
		0	14	14	0	0
		1	18	17	0.0555556	0.0588235
		0	1	1	0	0
		3	18	15	0.166667	0.2
		0	35	35	0	0
		1	35	34	0.0285714	0.0294118
		0	8	8	0	0
		0	18	18	0	0
		0	9	9	0	0
		1	7	6	0.142857	0.166667
		11	54	43	0.203704	0.255814
		12	25	13	0.48	0.923077
		10	32	22	0.3125	0.454545
		21	26	5	0.807692	4.2
		5	45	40	0.111111	0.125
		1	52	51	0.0192308	0.0196078
		0	45	45	0	0
		4	53	49	0.0754717	0.0816327
		1	15	14	0.0666667	0.0714286
		0	44	44	0	0
		0	13	13	0	0
		25	73	48	0.342466	0.520833
		11	21	10	0.52381	1.1
		6	65	59	0.0923077	0.101695
		4	22	18	0.181818	0.222222
		0	9	9	0	0
		0	5	5	0	0
		0	2	2	0	0
		0	14	14	0	0
		3	88	85	0.0340909	0.0352941
		0	13	13	0	0
		4	71	67	0.056338	0.0597015
		1	48	47	0.0208333	0.0212766
		0	39	39	0	0
		0	70	70	0	0
		3	108	105	0.0277778	0.0285714
		5	21	16	0.238095	0.3125
		3	24	21	0.125	0.142857
		0	1	1	0	0
		1	4	3	0.25	0.333333
		0	66	66	0	0
		2	23	21	0.0869565	0.0952381
		2	15	13	0.133333	0.153846
		11	60	49	0.183333	0.22449
		5	42	37	0.119048	0.135135
		0	7	7	0	0
		5	72	67	0.0694444	0.0746269
		6	25	19	0.24	0.315789
		0	15	15	0	0
		0	3	3	0	0
		0	4	4	0	0
		4	18	14	0.222222	0.285714
		29	83	54	0.349398	0.537037
		16	87	71	0.183908	0.225352
		6	51	45	0.117647	0.133333
		7	35	28	0.2	0.25
		0	19	19	0	0
		0	11	11	0	0
		0	12	12	0	0
		1	8	7	0.125	0.142857
		3	22	19	0.136364	0.157895
		4	20	16	0.2	0.25
		1	55	54	0.0181818	0.0185185
		0	76	76	0	0
		13	101	88	0.128713	0.147727
		10	79	69	0.126582	0.144928
		2	65	63	0.0307692	0.031746
		0	12	12	0	0
		0	4	4	0	0
		0	26	26	0	0
		8	143	135	0.0559441	0.0592593
		12	106	94	0.113208	0.12766
		7	98	91	0.0714286	0.0769231
		0	77	77	0	0
		41	135	94	0.303704	0.43617
		1	99	98	0.010101	0.0102041
		0	44	44	0	0
		0	34	34	0	0
		0	88	88	0	0
		0	79	79	0	0
		1	89	88	0.011236	0.0113636
		0	15	15	0	0
		0	23	23	0	0
		0	19	19	0	0
		1	98	97	0.0102041	0.0103093
		0	3	3	0	0
		0	11	11	0	0
		2	58	56	0.0344828	0.0357143
		1	22	21	0.0454545	0.047619
		0	17	17	0	0
		0	22	22	0	0
		1	8	7	0.125	0.142857
		0	1	1	0	0
		4	64	60	0.0625	0.0666667
		1	22	21	0.0454545	0.047619
		0	22	22	0	0
		4	65	61	0.0615385	0.0655738
		4	60	56	0.0666667	0.0714286
		8	43	35	0.186047	0.228571
		1	26	25	0.0384615	0.04
		2	15	13	0.133333	0.153846
		1	39	38	0.025641	0.0263158
		6	69	63	0.0869565	0.0952381
		11	35	24	0.314286	0.458333
		0	17	17	0	0
		1	35	34	0.0285714	0.0294118
		2	10	8	0.2	0.25
		1	4	3	0.25	0.333333
		0	3	3	0	0
		0	3	3	0	0
		1	7	6	0.142857	0.166667
		4	22	18	0.181818	0.222222
		0	7	7	0	0
		1	8	7	0.125	0.142857
		2	11	9	0.181818	0.222222
		1	4	3	0.25	0.333333
		2	17	15	0.117647	0.133333
		0	7	7	0	0
		0	4	4	0	0
		2	37	35	0.0540541	0.0571429
		4	39	35	0.102564	0.114286
		6	33	27	0.181818	0.222222
		1	34	33	0.0294118	0.030303
		21	197	176	0.106599	0.119318
		17	69	52	0.246377	0.326923
		0	41	41	0	0
		8	44	36	0.181818	0.222222
		4	22	18	0.181818	0.222222
		3	36	33	0.0833333	0.0909091
		0	15	15	0	0
		8	42	34	0.190476	0.235294
		0	11	11	0	0
		6	17	11	0.352941	0.545455
		10	20	10	0.5	1
		12	43	31	0.27907	0.387097
		5	28	23	0.178571	0.217391
		2	34	32	0.0588235	0.0625
		3	25	22	0.12	0.136364
		12	45	33	0.266667	0.363636
		0	7	7	0	0
		7	25	18	0.28	0.388889
		6	37	31	0.162162	0.193548
		0	10	10	0	0
		0	25	25	0	0
		0	35	35	0	0
		8	24	16	0.333333	0.5
		5	29	24	0.172414	0.208333
		5	36	31	0.138889	0.16129
		1	30	29	0.0333333	0.0344828
	mean				0.106395	0.179832

## Sheet: 1hr-TFF3
		total INTFF3	total EXTFF3	total exonic minus total intronic	ratio total/total	ratio total intronic/absolute exonic
		8	54	46	0.148148	0.173913
		5	59	54	0.0847458	0.0925926
		21	143	122	0.146853	0.172131
		35	102	67	0.343137	0.522388
		3	50	47	0.06	0.0638298
		0	50	50	0	0
		0	47	47	0	0
		5	53	48	0.0943396	0.104167
		0	108	108	0	0
		22	121	99	0.181818	0.222222
		1	25	24	0.04	0.0416667
		0	5	5	0	0
		8	46	38	0.173913	0.210526
		5	27	22	0.185185	0.227273
		5	51	46	0.0980392	0.108696
		30	111	81	0.27027	0.37037
		3	106	103	0.0283019	0.0291262
		28	196	168	0.142857	0.166667
		0	66	66	0	0
		9	56	47	0.160714	0.191489
		3	53	50	0.0566038	0.06
		1	65	64	0.0153846	0.015625
		4	191	187	0.0209424	0.0213904
		17	38	21	0.447368	0.809524
		6	26	20	0.230769	0.3
		7	75	68	0.0933333	0.102941
		0	14	14	0	0
		3	19	16	0.157895	0.1875
		0	69	69	0	0
		32	194	162	0.164948	0.197531
		18	205	187	0.0878049	0.0962567
		10	235	225	0.0425532	0.0444444
		7	111	104	0.0630631	0.0673077
		7	41	34	0.170732	0.205882
		1	13	12	0.0769231	0.0833333
		0	46	46	0	0
		0	44	44	0	0
		3	7	4	0.428571	0.75
		27	48	21	0.5625	1.28571
		15	43	28	0.348837	0.535714
		6	37	31	0.162162	0.193548
		0	52	52	0	0
		0	3	3	0	0
		0	32	32	0	0
		30	32	2	0.9375	15
		0	15	15	0	0
		1	2	1	0.5	1
		0	31	31	0	0
		17	345	328	0.0492754	0.0518293
		0	44	44	0	0
		1	54	53	0.0185185	0.0188679
		19	72	53	0.263889	0.358491
		9	47	38	0.191489	0.236842
		0	42	42	0	0
		14	104	90	0.134615	0.155556
		4	51	47	0.0784314	0.0851064
		0	40	40	0	0
		0	33	33	0	0
		2	116	114	0.0172414	0.0175439
		1	35	34	0.0285714	0.0294118
		3	35	32	0.0857143	0.09375
		6	33	27	0.181818	0.222222
		7	26	19	0.269231	0.368421
		23	121	98	0.190083	0.234694
		28	96	68	0.291667	0.411765
		14	77	63	0.181818	0.222222
		5	58	53	0.0862069	0.0943396
		1	4	3	0.25	0.333333
		0	5	5	0	0
		5	48	43	0.104167	0.116279
		36	144	108	0.25	0.333333
		0	7	7	0	0
		1	52	51	0.0192308	0.0196078
		0	11	11	0	0
		0	11	11	0	0
		0	41	41	0	0
		31	141	110	0.219858	0.281818
		18	156	138	0.115385	0.130435
		17	135	118	0.125926	0.144068
		0	70	70	0	0
		0	64	64	0	0
		0	96	96	0	0
		6	108	102	0.0555556	0.0588235
		16	178	162	0.0898876	0.0987654
		0	123	123	0	0
		6	113	107	0.0530973	0.0560748
		0	123	123	0	0
		0	59	59	0	0
		2	141	139	0.0141844	0.0143885
		2	96	94	0.0208333	0.0212766
		7	267	260	0.0262172	0.0269231
		0	27	27	0	0
		0	10	10	0	0
		24	38	14	0.631579	1.71429
		6	14	8	0.428571	0.75
		2	17	15	0.117647	0.133333
		9	34	25	0.264706	0.36
		5	23	18	0.217391	0.277778
		3	57	54	0.0526316	0.0555556
		4	53	49	0.0754717	0.0816327
		3	6	3	0.5	1
		2	15	13	0.133333	0.153846
		3	35	32	0.0857143	0.09375
		5	26	21	0.192308	0.238095
		2	8	6	0.25	0.333333
		3	120	117	0.025	0.025641
		1	103	102	0.00970874	0.00980392
		21	164	143	0.128049	0.146853
		25	235	210	0.106383	0.119048
		12	133	121	0.0902256	0.0991736
		2	67	65	0.0298507	0.0307692
		2	57	55	0.0350877	0.0363636
		2	161	159	0.0124224	0.0125786
		1	46	45	0.0217391	0.0222222
		2	60	58	0.0333333	0.0344828
		23	143	120	0.160839	0.191667
		0	12	12	0	0
		2	6	4	0.333333	0.5
		9	102	93	0.0882353	0.0967742
		0	10	10	0	0
		0	3	3	0	0
		1	20	19	0.05	0.0526316
		0	7	7	0	0
		5	87	82	0.0574713	0.0609756
		3	60	57	0.05	0.0526316
		9	98	89	0.0918367	0.101124
		0	77	77	0	0
		2	23	21	0.0869565	0.0952381
		22	80	58	0.275	0.37931
		21	55	34	0.381818	0.617647
		7	42	35	0.166667	0.2
		3	67	64	0.0447761	0.046875
		1	53	52	0.0188679	0.0192308
		12	41	29	0.292683	0.413793
		0	68	68	0	0
		0	91	91	0	0
		0	18	18	0	0
		0	41	41	0	0
		0	55	55	0	0
		14	145	131	0.0965517	0.10687
		2	121	119	0.0165289	0.0168067
		2	135	133	0.0148148	0.0150376
		3	67	64	0.0447761	0.046875
		11	89	78	0.123596	0.141026
		8	95	87	0.0842105	0.091954
		18	67	49	0.268657	0.367347
		1	6	5	0.166667	0.2
		1	4	3	0.25	0.333333
		2	33	31	0.0606061	0.0645161
		0	43	43	0	0
		0	29	29	0	0
		21	55	34	0.381818	0.617647
		1	15	14	0.0666667	0.0714286
		1	57	56	0.0175439	0.0178571
		25	241	216	0.103734	0.115741
		29	142	113	0.204225	0.256637
		2	76	74	0.0263158	0.027027
		6	101	95	0.0594059	0.0631579
		1	55	54	0.0181818	0.0185185
		43	86	43	0.5	1
		0	7	7	0	0
		0	14	14	0	0
		0	26	26	0	0
		1	8	7	0.125	0.142857
		14	102	88	0.137255	0.159091
		0	45	45	0	0
		0	55	55	0	0
		6	34	28	0.176471	0.214286
		8	19	11	0.421053	0.727273
		6	21	15	0.285714	0.4
		3	20	17	0.15	0.176471
		9	123	114	0.0731707	0.0789474
		2	117	115	0.017094	0.0173913
		3	77	74	0.038961	0.0405405
		0	89	89	0	0
		12	95	83	0.126316	0.144578
		10	47	37	0.212766	0.27027
		0	25	25	0	0
		2	50	48	0.04	0.0416667
		2	40	38	0.05	0.0526316
		1	108	107	0.00925926	0.00934579
		1	60	59	0.0166667	0.0169492
		0	34	34	0	0
		17	115	98	0.147826	0.173469
		0	42	42	0	0
		3	32	29	0.09375	0.103448
		2	128	126	0.015625	0.015873
		14	61	47	0.229508	0.297872
		23	57	34	0.403509	0.676471
		1	21	20	0.047619	0.05
		1	57	56	0.0175439	0.0178571
		0	69	69	0	0
		0	67	67	0	0
		2	76	74	0.0263158	0.027027
		19	156	137	0.121795	0.138686
		0	10	10	0	0
		0	51	51	0	0
		9	52	43	0.173077	0.209302
		8	75	67	0.106667	0.119403
		0	22	22	0	0
		1	6	5	0.166667	0.2
		6	39	33	0.153846	0.181818
		1	37	36	0.027027	0.0277778
		1	74	73	0.0135135	0.0136986
		18	136	118	0.132353	0.152542
		4	156	152	0.025641	0.0263158
		7	188	181	0.037234	0.038674
		1	112	111	0.00892857	0.00900901
		0	11	11	0	0
		1	12	11	0.0833333	0.0909091
		12	55	43	0.218182	0.27907
	mean				0.105748	0.214975

## Sheet: 3hr-TFF3
		total INTFF3	total EXTFF3	total exonic minus total intronic	ratio total/total	ratio total intronic/absolute exonic
		18	55	37	0.327273	0.486486
		4	9	5	0.444444	0.8
		4	9	5	0.444444	0.8
		1	25	24	0.04	0.0416667
		35	126	91	0.277778	0.384615
		10	25	15	0.4	0.666667
		19	51	32	0.372549	0.59375
		2	8	6	0.25	0.333333
		5	49	44	0.102041	0.113636
		1	22	21	0.0454545	0.047619
		2	7	5	0.285714	0.4
		7	44	37	0.159091	0.189189
		3	10	7	0.3	0.428571
		19	52	33	0.365385	0.575758
		8	22	14	0.363636	0.571429
		28	178	150	0.157303	0.186667
		52	247	195	0.210526	0.266667
		32	171	139	0.187135	0.230216
		6	133	127	0.0451128	0.0472441
		1	41	40	0.0243902	0.025
		16	156	140	0.102564	0.114286
		11	65	54	0.169231	0.203704
		27	149	122	0.181208	0.221311
		15	198	183	0.0757576	0.0819672
		1	58	57	0.0172414	0.0175439
		24	62	38	0.387097	0.631579
		49	77	28	0.636364	1.75
		21	32	11	0.65625	1.90909
		5	40	35	0.125	0.142857
		11	41	30	0.268293	0.366667
		1	11	10	0.0909091	0.1
		0	12	12	0	0
		1	32	31	0.03125	0.0322581
		0	6	6	0	0
		0	34	34	0	0
		3	74	71	0.0405405	0.0422535
		0	11	11	0	0
		1	22	21	0.0454545	0.047619
		1	22	21	0.0454545	0.047619
		0	22	22	0	0
		32	44	12	0.727273	2.66667
		29	33	4	0.878788	7.25
		18	45	27	0.4	0.666667
		7	44	37	0.159091	0.189189
		0	12	12	0	0
		0	10	10	0	0
		2	52	50	0.0384615	0.04
		1	54	53	0.0185185	0.0188679
		27	44	17	0.613636	1.58824
		31	60	29	0.516667	1.06897
		16	108	92	0.148148	0.173913
		23	150	127	0.153333	0.181102
		1	25	24	0.04	0.0416667
		1	419	418	0.00238663	0.00239234
		18	44	26	0.409091	0.692308
		1	5	4	0.2	0.25
		19	20	1	0.95	19
		3	53	50	0.0566038	0.06
		22	39	17	0.564103	1.29412
		35	40	5	0.875	7
		7	23	16	0.304348	0.4375
		2	21	19	0.0952381	0.105263
		66	115	49	0.573913	1.34694
		1	19	18	0.0526316	0.0555556
		32	39	7	0.820513	4.57143
		19	60	41	0.316667	0.463415
		19	23	4	0.826087	4.75
		0	34	34	0	0
		14	56	42	0.25	0.333333
		0	10	10	0	0
		15	17	2	0.882353	7.5
		1	6	5	0.166667	0.2
		23	102	79	0.22549	0.291139
		0	7	7	0	0
		26	30	4	0.866667	6.5
		31	47	16	0.659574	1.9375
		11	45	34	0.244444	0.323529
		21	80	59	0.2625	0.355932
		43	96	53	0.447917	0.811321
		1	20	19	0.05	0.0526316
		3	14	11	0.214286	0.272727
		63	125	62	0.504	1.01613
		2	68	66	0.0294118	0.030303
		1	43	42	0.0232558	0.0238095
		19	116	97	0.163793	0.195876
		26	82	56	0.317073	0.464286
		11	44	33	0.25	0.333333
		12	144	132	0.0833333	0.0909091
		3	51	48	0.0588235	0.0625
		1	23	22	0.0434783	0.0454545
		22	48	26	0.458333	0.846154
		1	51	50	0.0196078	0.02
		1	2	1	0.5	1
		2	15	13	0.133333	0.153846
		0	7	7	0	0
		1	10	9	0.1	0.111111
		3	16	13	0.1875	0.230769
		1	11	10	0.0909091	0.1
		7	20	13	0.35	0.538462
		1	3	2	0.333333	0.5
		1	2	1	0.5	1
		2	10	8	0.2	0.25
		1	4	3	0.25	0.333333
		54	112	58	0.482143	0.931034
		15	115	100	0.130435	0.15
		16	66	50	0.242424	0.32
		23	51	28	0.45098	0.821429
		30	198	168	0.151515	0.178571
		16	132	116	0.121212	0.137931
		29	154	125	0.188312	0.232
		11	216	205	0.0509259	0.0536585
		8	45	37	0.177778	0.216216
		25	47	22	0.531915	1.13636
		9	106	97	0.0849057	0.0927835
		32	92	60	0.347826	0.533333
		28	40	12	0.7	2.33333
		92	141	49	0.652482	1.87755
		39	65	26	0.6	1.5
		22	66	44	0.333333	0.5
		17	198	181	0.0858586	0.0939227
		33	167	134	0.197605	0.246269
		2	34	32	0.0588235	0.0625
		16	99	83	0.161616	0.192771
		7	39	32	0.179487	0.21875
		8	56	48	0.142857	0.166667
		22	133	111	0.165414	0.198198
		8	40	32	0.2	0.25
		0	8	8	0	0
		8	26	18	0.307692	0.444444
		2	38	36	0.0526316	0.0555556
		22	42	20	0.52381	1.1
		34	69	35	0.492754	0.971429
		1	55	54	0.0181818	0.0185185
		3	46	43	0.0652174	0.0697674
		15	82	67	0.182927	0.223881
		3	96	93	0.03125	0.0322581
		53	293	240	0.180887	0.220833
		1	37	36	0.027027	0.0277778
		2	41	39	0.0487805	0.0512821
		2	25	23	0.08	0.0869565
		29	38	9	0.763158	3.22222
		28	50	22	0.56	1.27273
		1	35	34	0.0285714	0.0294118
		3	42	39	0.0714286	0.0769231
		1	37	36	0.027027	0.0277778
		23	25	2	0.92	11.5
		6	12	6	0.5	1
		14	34	20	0.411765	0.7
		1	31	30	0.0322581	0.0333333
		1	6	5	0.166667	0.2
		5	6	1	0.833333	5
		3	5	2	0.6	1.5
		41	69	28	0.594203	1.46429
		4	59	55	0.0677966	0.0727273
		0	3	3	0	0
		5	43	38	0.116279	0.131579
		1	32	31	0.03125	0.0322581
		0	4	4	0	0
		4	32	28	0.125	0.142857
		2	16	14	0.125	0.142857
		0	1	1	0	0
		4	7	3	0.571429	1.33333
		0	3	3	0	0
		2	11	9	0.181818	0.222222
		19	27	8	0.703704	2.375
		2	4	2	0.5	1
		0	9	9	0	0
		5	15	10	0.333333	0.5
		20	50	30	0.4	0.666667
		1	25	24	0.04	0.0416667
		2	39	37	0.0512821	0.0540541
		1	134	133	0.00746269	0.0075188
		30	66	36	0.454545	0.833333
		43	90	47	0.477778	0.914894
		1	64	63	0.015625	0.015873
		19	80	61	0.2375	0.311475
		11	51	40	0.215686	0.275
		17	78	61	0.217949	0.278689
		22	52	30	0.423077	0.733333
		16	57	41	0.280702	0.390244
		1	83	82	0.0120482	0.0121951
		19	76	57	0.25	0.333333
		32	78	46	0.410256	0.695652
		12	87	75	0.137931	0.16
		3	43	40	0.0697674	0.075
		22	62	40	0.354839	0.55
		12	58	46	0.206897	0.26087
		1	123	122	0.00813008	0.00819672
		18	69	51	0.26087	0.352941
		1	59	58	0.0169492	0.0172414
		19	46	27	0.413043	0.703704
		58	77	19	0.753247	3.05263
		5	52	47	0.0961538	0.106383
		21	65	44	0.323077	0.477273
		4	52	48	0.0769231	0.0833333
		19	79	60	0.240506	0.316667
		10	76	66	0.131579	0.151515
		22	77	55	0.285714	0.4
		22	63	41	0.349206	0.536585
		15	37	22	0.405405	0.681818
		35	62	27	0.564516	1.2963
		7	149	142	0.0469799	0.0492958
		1	47	46	0.0212766	0.0217391
		11	261	250	0.0421456	0.044
		2	154	152	0.012987	0.0131579
		28	138	110	0.202899	0.254545
		7	178	171	0.0393258	0.0409357
		3	208	205	0.0144231	0.0146341
		7	107	100	0.0654206	0.07
		14	70	56	0.2	0.25
		41	113	72	0.362832	0.569444
		17	158	141	0.107595	0.120567
		14	134	120	0.104478	0.116667
		25	47	22	0.531915	1.13636
	mean				0.247362	0.738117
