# Supplementary material for: Ligand-dependent enhancer activation indirectly modulates non-target promoters in a chromatin domain
Source: eLife. 2026 Jul 7;13:RP102417. doi: 10.7554/eLife.102417 (PMC13341115; doi:10.7554/eLife.102417)
Supplement: Figure 2—source data 1. [file elife-102417-fig2-data1.xlsx]

## Sheet: 2B
Repeat1									Repeat2									Repeat3
Uninduced	InTFF1	InTFF3	1hr	InTFF1	InTFF3	3hr	InTFF1	InTFF3	Uninduced	InTFF1	InTFF3	1hr	InTFF1	InTFF3	3hr	InTFF1	InTFF3	Uninduced	InTFF1	InTFF3	1hr	InTFF1	InTFF3	3hr	InTFF1	InTFF3
	16	0		48	6		17	82		18	0		29	22		17	45		2	14		40	49		21	1
	9	2		77	3		6	14		23	1		45	0		27	15		32	1		81	17		2	7
	2	9		52	2		1	7		25	1		61	0		28	18		7	10		59	46		8	20
	2	0		135	3		8	23		19	0		84	1		12	20		0	2		85	5		7	9
	26	5		70	0		17	23		51	1		53	1		70	7		4	6		36	2		8	1
	2	3		18	3		7	44		22	0		1	14		38	1		0	3		89	4		52	3
	0	5		11	0		2	20		40	0		59	0		11	64		10	11		70	31		51	6
	4	3		25	0		25	34		75	0		33	0		72	7		39	13		50	3		10	2
	17	0		16	0		1	3		31	2		77	3		28	11		23	20		20	1		19	4
	3	9		113	33		25	43		18	0		18	42		11	23		35	0		33	11		28	4
	3	0		10	0		28	4		29	1		18	2		18	7		22	14		62	3		16	20
	11	0		8	0		50	47		19	0		25	28		22	3		10	0		52	3		29	1
	3	2		70	0		40	31		23	0		44	14		43	3		24	6		70	2		31	3
	3	4		57	5		38	30		49	2		61	2		74	3		10	1		10	9		16	0
	51	7		34	1		17	31		21	1		19	0		24	42		42	12		33	6		58	2
	23	0		35	4		61	15		29	0		49	0		8	49		24	5		44	3		80	2
	40	5		43	13		19	5		21	0		121	0		40	18		29	4		42	4		51	4
	13	2		8	0		48	6		18	0		97	3		0	46		18	1		27	2		120	5
	26	1		34	0		45	30		27	0		46	1		56	6		15	3		33	1		30	1
	18	0		21	10		5	6		3	8		36	0		96	15		16	2		47	0		19	0
	9	0		15	4		20	15		2	7		52	0		10	30		58	9		6	15		103	2
	16	0		30	20		60	2		4	20		59	0		21	25		12	1		1	10		58	16
	26	13		74	2		65	8		0	19		0	4		60	3		6	0		6	36		29	6
	16	2		6	0		20	10		20	9		48	11		66	14		7	1		16	15		46	3
	57	0		13	11		41	0		21	18		15	34		33	60		12	5		49	0		33	3
	28	3		19	8		2	0		31	8		61	12		34	14		20	0		31	10		80	1
	30	0		36	11		40	11		31	10		23	2		31	24		9	6		20	5		60	2
	23	0		112	17		24	0		21	8		28	3		39	0		13	2		25	3		33	7
	32	9		126	10		37	5		1	5		26	35		76	4		6	0		4	12		73	10
	8	3		57	20		25	0		0	11		7	9		54	2		25	0		122	2		48	1
	20	2		43	31		4	4		9	10		40	5		18	19		9	2		18	2		67	0
	35	6		170	51		21	8		19	2		45	3		4	17		9	3		43	0		30	1
	15	0		63	10		21	29		27	1		21	2		12	14		25	1		10	22		49	3
	8	2		59	0		21	0		26	6		132	0		40	103		6	0		7	28		71	1
	39	13		70	4		10	8		29	0		9	9		25	11		17	1		20	17		200	6
	17	0		19	2		38	0		17	0		46	0		9	40		11	3		34	3		90	3
	25	3		28	7		21	2		18	0		55	3		112	3		16	0		46	7		90	10
	18	9		60	47		24	7		16	0		63	1		56	11		3	6		85	19		35	4
	9	3		39	18		58	1		29	0		43	3		64	10		13	9		64	2		45	0
	11	9		61	2		35	13		33	2		17	0		58	2		3	15		51	0		29	6
	4	0		16	1		56	0		8	51		72	3		20	7		26	21		70	5		60	7
	4	8		18	2		3	3		21	0		53	1		77	1		65	1		56	5		45	25
	9	0		102	0		37	0		15	6		41	12		23	34		41	0		90	3		11	14
	8	2		30	23		46	0		29	2		102	4		1	8		38	0		93	8		20	5
	6	0		30	35		93	2		22	0		68	0		55	15		11	5		48	1		13	4
	5	1		26	0		16	4		27	0		64	0		14	48		31	2		94	5		20	30
	3	1		10	25		0	16		37	0		43	0		44	10		24	0		209	13		30	25
	0	0		0	34		33	9		21	0		41	0		62	11		18	2		64	4		42	25
	1	3		13	1		18	4		18	0		71	0		62	2		70	4		52	2		7	11
	35	6		36	2		2	4		26	0		41	0		19	8		19	5		36	0		17	16
	30	6		21	29		61	12		23	4		31	1		77	28		18	4		2	2		7	8
	22	8		9	5		97	48		18	0		28	4		22	13		23	4		39	1		6	5
	38	3		33	4		48	6		25	4		47	0		32	12		67	3		61	4		25	25
	34	0		38	3		7	6		17	0		90	0		15	30		28	3		15	8		27	32
	22	3		37	0		2	2		0	5		50	0		77	10		15	1		25	1		35	25
	7	0		73	6		43	8		14	46		83	0		16	1		31	1		22	4		25	18
	8	3		45	12		3	0		0	4		24	0		20	5		12	5		93	2		18	36
	24	0		90	17		6	0		0	13		43	0		3	10		22	5		33	0		17	2
	22	0		28	6		3	38		15	6		48	0		40	42		18	3		103	3		61	13
	43	16		80	21		17	0		18	1		39	0		40	26		45	4		36	3		40	14
	10	1		20	20		10	31		25	0		42	0		36	52		19	2		21	0		45	8
	36	5		60	9		4	1		16	0		33	0		19	54		23	0		43	0		50	1
	55	6		41	0		5	4		32	5		43	10		13	21		9	0		28	1		40	3
	50	2		16	0		24	37		16	4		25	0		36	5		8	2		22	1		34	6
	41	9		75	0		2	3		11	11		19	0		70	3		26	2		57	33		111	4
	10	0		17	2		7	6		25	0		1	37		58	0		7	2		30	0		100	1
	42	36		45	2		11	7		22	0		11	19		0	40		31	13		30	4		68	6
	10	3		9	5		20	35		70	2		4	10		30	20		28	25		40	45		43	8
	36	12		9	5		3	7		35	0		11	15		65	0		39	0		42	13		21	6
	40	11		125	12		5	0		16	0		16	20		53	0		40	2		22	0		63	1
	4	12		62	3		31	1		0	5		7	17		7	60		14	0		16	25		0	8
	12	17		59	1		16	0		1	4		16	15		22	5		23	0		61	22		15	29
	24	5		90	3		17	2		39	2		41	22		50	0		13	3		48	2		11	13
	23	8		80	2		10	5		33	0		40	75		35	1		3	1		40	1		14	20
	20	1		22	1		10	3		53	0		18	22		80	0		12	17		34	0		25	0
	25	4		27	1		2	28		50	2		35	40		6	42		15	7		35	1		42	0
	80	4		6	0		67	12		25	0		37	18		20	26		32	1		69	26		80	13
	21	7		35	1		40	12		16	0		41	7		42	2		18	2		34	4		26	1
	12	0		29	0		87	3		18	0		59	0		35	24		15	0		15	2		20	2
	23	12		15	8		11	18		24	0		75	16		23	35		0	19		38	0		1	5
	20	1		20	17		11	0		13	10		33	0		73	0		3	11		54	2		22	11
	45	3		110	11		34	1		30	0		36	25		71	1		5	1		38	5		16	40
	28	0		75	23		20	15		68	13		64	0		40	0		3	14		58	3		51	13
	10	0		13	6		25	12		3	4		45	1		35	35		0	5		38	4		13	0
	44	5		30	41		28	6		3	4		84	0		22	1		0	1		17	6		10	45
	20	0		14	2		25	45		26	0		20	23		1	30		6	4		10	10		5	20
	16	25		13	0		32	12		12	6		24	2		91	4		2	4		30	0		27	2
	21	34		5	2		19	43		16	23		11	9		85	5		13	7		61	4		25	8
	20	2		25	0		70	6		32	13		39	5		80	8		3	4		41	1		12	30
	42	6		89	2		25	0		25	0		104	0		1	35		14	3		30	5		33	4
	21	8		42	15		3	2		17	4		129	13		2	35		33	0		20	0		8	20
	45	3		11	0		16	11		17	10		82	24		54	3		44	1		24	13		17	20
	19	0		50	0		44	14		15	11		47	25		25	69		22	1		95	0		32	0
	20	2		40	0		8	17		26	4		25	16		14	35		19	0		67	8		4	6
	7	28		67	3		2	4		17	7		79	6		19	21		20	1		32	5		0	4
	3	8		37	1		5	3		35	2		25	35		90	0		20	2		65	4		17	6
	4	7		38	1		24	22		1	5		57	0		77	10		6	2		41	1		58	8
	1	6		24	1		63	20		16	0		177	2		23	27		48	3		17	1		44	2
	50	7		33	31		12	0		42	4		47	4		50	4		19	2		13	6		81	3
	65	2		72	2		28	4		12	8		78	0		47	2		44	5		32	4		54	2
	45	9		50	1		76	9		10	13		11	17		57	0		38	6		43	8		14	3
	45	3		49	7		4	16		2	5		31	0		27	4		15	4		40	1		62	7
	28	22		55	4		56	14		8	4		44	2		53	0		7	21		56	2		7	10
	41	2		25	3		30	12		38	0		73	9		27	2		15	47		28	1		28	0
	27	2		45	7		8	5		16	1		37	0		4	40		46	5		39	2		28	1
	33	2		52	18		5	23		24	3		87	3		44	2		40	0		42	3		17	5
	60	0		31	8		0	12		19	1		27	0		75	9		36	9		19	1		3	25
	43	0		33	6		9	10		21	1		37	0		80	6		34	13		45	3		39	3
	40	4		30	16		9	21		0	5		38	0		78	4		27	5		21	0		8	5
	38	0		21	0		5	0		37	1		15	9		2	9		34	2		24	1		29	4
	39	3		50	2		34	46		24	4		20	0		17	8		114	5		6	13		29	1
	40	0		23	25		36	0		7	7		43	7		52	5		30	0		19	0		15	2
	45	0		30	0		8	31		20	8		143	6		35	1		27	4		24	0		15	25
	25	6		13	0		62	11		12	20		62	6		15	40		35	22		9	13		13	1
	14	30		13	16		11	12		13	1		30	6		6	35		12	35		23	4		12	1
	16	4		7	25		23	1		13	0		77	0		31	12		17	4		16	3		32	0
	20	2		0	3		4	21		10	0		6	9		3	25		24	0		17	3		30	3
	32	0		0	27		2	0		11	0		50	0		1	35		9	0		14	20		27	86
	46	10		37	0		17	2		6	0		73	3		45	10		0	15		28	1		21	50
	54	1		61	3		11	0		0	1		81	2		43	5		3	8		33	1		40	45
	16	8		38	3		79	4		8	1		35	13		60	1		2	1		89	4		75	4
	15	0		95	3		11	72		7	1		77	0		6	5		0	5		19	0		90	2
	23	2		16	3		14	24		10	1		57	0		7	30		5	21		21	18		11	22
	7	7		49	0		11	11		0	3		60	0		9	9		19	18		20	3		16	16
	13	0		7	0		2	8		2	2		43	0		31	9		12	3		23	0		25	41
	1	12		45	10		74	5		1	1		44	34		26	25		27	13		45	2		11	44
	10	0		36	0		5	8		7	1		3	28		4	10		33	5		30	1		29	28
	11	14		8	23		3	28		6	0		5	11		4	5		13	0		38	1		59	30
	9	3		3	0		3	11		6	1		6	18		5	42		19	2		46	2		3	11
	18	0		8	1		5	4		11	0		2	29		14	45		12	3		14	0		83	7
	14	5		26	2		1	6		5	0		66	37		49	4		22	0		27	1		5	119
	20	2		44	3		0	12		9	0		57	7		51	18		33	2		52	5		62	108
	16	0		45	5		0	11		15	0		18	1		75	0		49	3		79	7		40	15
	7	6		17	6		10	12		5	1		11	9		70	3		22	0		23	0		38	23
	12	0		17	23		18	18		8	1		18	24		11	20		54	3		26	0		15	40
	2	7		19	22		4	0		8	0		18	15		8	35		40	4		65	2		29	33
	4	2		42	0		0	6		12	0		88	0		25	10		16	4		83	8		15	55
	22	4		136	13		13	1		13	2		53	1		14	15		58	12		23	9		27	39
MEAN	22.2101	4.84058		32	0		8	6		2	0		35	0		2	35		42	1		24	1		210	13
STDEV	16.1374	6.5705		10	0		34	10		9	0		40	0		1	15		31	0		36	6		46	31
				29	19		46	7		15	0		51	0		6	2		43	2		58	3		2	16
				13	6		14	4		11	3		89	0		3	2		24	6		43	2		30	37
				20	1		1	8		6	1		42	0		12	3		16	3		44	3		35	48
				9	0		10	11		13	0		6	22		15	1		93	1		61	1		15	58
				30	15		4	11		10	0		152	6		0	3		17	3		26	2		25	38
				33	5		1	25		8	0		37	1	MEAN	34.875	16.6597		29	24		108	3		25	7
				7	4		73	2		0	1		40	0	STDEV	26.3863	17.7906		19	12		37	2		96	20
				59	19		39	1		10	0		32	0					48	3		40	4		20	16
				75	13		9	7		3	0		64	0					66	9		63	2		30	9
				58	1		21	0		4	1		65	0					11	6		91	3		78	15
				36	1		55	3		4	2		66	10					78	16		28	1		12	18
				47	15		50	5		11	0		37	0					69	6		0	3		26	35
				28	1		23	2		15	0		56	2					8	3		48	3		7	36
				87	0		41	3		9	1		34	0					25	5		61	3		27	30
				22	40		34	4		6	1		52	0					11	7		8	8		23	40
				50	8		8	0		12	0		86	7					15	6		5	25		26	37
				55	4		6	6		9	0		54	0					3	0		4	40		115	47
				12	1		34	0		10	0		60	0					24	0		41	2		55	14
				94	0		128	12		14	0		49	0					27	1		71	4		40	0
				67	4		50	0		1	2		28	7					55	1		43	1		50	3
				28	1		80	4		3	1		50	2					15	4		57	7		50	40
				25	0		98	4		0	3		25	3					9	2		42	3		73	5
				9	0		21	18		0	3		44	3					6	2		53	3		69	8
				41	3		29	4		0	2		49	2					4	1		28	2		55	8
				85	3		71	2		5	1		38	2					0	21		49	2		94	2
				22	7		21	10		10	0		76	0					1	14		43	1		47	7
				4	0		64	3		6	0		75	0					0	3		38	0		47	8
				13	0		88	12		9	0		70	1					3	18		25	1		10	61
				16	8		27	4		6	0		22	0					6	9		26	0		20	35
				36	18		50	20		1	0		43	1					11	1		34	5		2	15
				82	20		29	3		1	2		20	0					12	1		27	4		10	28
				37	0		163	0		8	0		62	4					6	3		31	3		50	120
				10	15		2	30		10	1		69	2					11	0		58	16		35	20
				6	0		0	32		4	3		77	5					7	0		53	5		16	30
				19	0		2	33		8	1		22	0					9	1		116	5		20	13
				59	1		16	17		4	1		21	1					19	4		62	2		10	23
				47	16		0	18		12	0		38	0					16	0		114	4		3	17
				27	0		2	13		12	0		28	1					21	4		112	13		20	30
				31	13		0	10		13	2		102	1					2	0		84	9		35	25
				43	0		8	40		12	1		52	2					32	2		71	6		35	45
				5	0		32	17		10	3		77	0					50	7		51	5		35	24
				9	0		40	7		13	0		61	0					56	1		71	0		25	14
				6	3		0	16		15	0		99	0					10	0		45	3		13	25
				5	9		11	25		14	0		29	0					30	4		77	4		20	35
				4	9		58	12		10	0		34	0					15	7		60	1		25	12
				14	3		25	29		7	3		0	11					23	8		74	4		7	5
				5	0		72	57		11	0		31	7					27	2		132	6		25	4
				4	50		60	41		14	0		20	1					22	1		26	4		28	4
				48	8		64	0		10	0		58	1					15	2		26	14		13	20
				29	0		40	3		9	0		80	0					15	0		52	3		22	20
				131	0		20	62		5	3		38	0					46	1		166	6		111	3
				46	19		19	19		3	0		23	0					30	5		65	5		21	5
				80	17		25	10		4	0		98	1					13	4		92	41		60	5
				48	11		75	13		5	0		67	4					33	11		48	2		40	4
				37	0		13	10		12	0		60	0					12	21		54	4		45	30
				72	12		23	27		11	2		85	0					31	1		56	7		84	4
				53	4		30	0		8	3		29	0					24	26		99	16		14	45
				84	16		39	1		8	3		41	1					3	32		34	9		35	1
				55	2		30	32		3	2		31	0					12	5		46	1		13	14
				102	9		48	4		11	1		37	0					37	2		34	45		12	1
				114	6		138	5		0	2		33	0					18	14		32	1		23	3
				92	10		41	17		0	2		44	0					26	8		71	10		1	11
				29	0		53	7		4	1		21	0					70	3		51	4		23	11
				87	0		26	40		0	0		26	0					14	4		108	4		29	14
				135	9		4	26		3	1		87	1					6	7		90	1		26	11
				69	3		20	15		9	0		20	0					8	1		141	14		45	10
				78	13		8	21		9	0		39	10					9	6		78	4		41	2
				89	0		3	44		7	0		46	2					11	4		21	0		33	4
				66	20		0	53		10	2		30	0					16	7		12	0		40	4
				65	20		6	40		5	0		57	0					3	29		53	5		46	0
				64	2		15	16		7	0		97	0					0	32		70	1		60	0
				55	0		6	14		10	0		5	10					6	19		67	6		59	2
				42	7		3	19		6	0		37	0					5	11		61	2		25	20
				52	1		0	14		10	0		53	0					5	9		107	0		47	1
				50	4		13	45		13	2		47	0					0	12		66	1		2	62
				28	15		2	4		12	1		70	0					6	7		70	0		30	25
				90	5		31	7		6	1		40	0					1	10		23	8		30	20
				50	15		0	28		6	0		32	0					5	2		53	1		12	20
				0	12		25	58		14	0		67	21					18	2		40	0		23	20
				13	5		8	50		8	2		65	0					36	5		40	4		55	5
				8	11		0	29		2	1		38	0					48	4		19	2		70	3
				21	13		17	18	MEAN	14.8091	2.8		109	0					37	27		35	1		47	4
				11	6		13	3	STDEV	12.7509	5.94234		49	2					21	1		52	0		25	0
				25	25		15	18					35	0					9	2		16	0		25	10
				76	0		30	32					31	1					20	0		52	7		0	23
				35	0		16	33					81	2					22	4		25	3		2	25
				40	0		5	21					57	1					18	1		127	4		10	35
				48	0		42	40					32	0					4	16		36	1		25	29
				41	4		6	12					35	0					27	4		42	3		14	30
				35	0		2	13					20	0					9	8		60	1		5	20
				85	0		24	12					59	6					4	4		45	3		10	37
				48	3		9	17					16	6					3	11		40	20		53	1
				55	4		7	19					35	9					36	0		60	2		13	30
				34	1		4	10					0	8					79	3		37	2		38	0
				83	1		31	5					100	3					42	7		37	1		37	0
				41	8		13	10					159	3					29	2		28	14		55	7
				16	7		1	2					93	1					7	6		50	45		20	30
				17	4		16	7					93	6					42	9		68	1		6	25
				35	0		6	5					133	13					14	1		30	1		25	34
				16	0		49	0					116	4					34	7		75	0		22	1
				23	0		20	4					109	8					43	4		49	5		0	40
				30	40		33	14					78	1					42	3		61	2		56	3
				30	5		60	4					167	0					9	5		11	4		20	15
				72	0		31	0					101	2					15	5		26	2		50	5
				35	4		23	0					67	0					19	4		24	1		17	10
				21	0		40	6					107	0					4	45		14	4		43	3
				21	3		37	14					88	0					10	2		11	2		63	39
				22	3		60	15					71	10					21	14		0	3		71	2
				0	30		15	29					22	23					25	0		25	60		101	3
				0	20		0	12					14	0					22	0		0	45		107	7
				1	25		2	39					14	0					37	5		46	1		27	12
				11	4		0	39					5	1					27	7		117	2		66	10
				2	4		11	35					4	3					29	3		53	9		39	21
				98	3		7	32					10	2					9	2		25	30		22	0
				140	5		4	11					5	3					19	3		23	17		10	20
				28	0		9	10					15	3					16	11		86	4		30	15
				31	2		8	17					13	1					18	2		74	4		5	30
				55	7		2	17					10	0					11	0		64	0		18	24
				57	7		69	0					0	3					2	16		70	3		58	3
				104	12		59	2					14	1					0	13		55	2		21	2
				6	3		59	15					11	1					6	6		34	30		13	30
				29	2		55	7					5	0					29	1		4	5		25	24
				5	1		86	2				MEAN	48.0268	5.33716					53	5		4	9		19	50
				25	0		45	5				STDEV	32.2714	9.59614					6	11		31	1		40	11
				33	0		70	10											40	2		60	2		3	40
				50	2		24	4											13	33		60	0		85	6
				15	28		13	10											6	0		40	4		25	35
				43	0		6	11											38	1		44	0		10	2
				51	0		4	3											20	1		60	2		54	15
				35	1		0	8											0	4		39	0		33	5
				13	0		4	12											0	15		160	22		50	5
				34	1		31	4											38	15		11	4		75	7
				73	16		30	27											67	2		42	1		16	30
				47	2		8	8											14	15		78	2		4	15
				59	0		29	78											18	10		35	4		3	12
				34	35		15	98											65	1		5	9		0	15
				17	0		25	35											28	1		18	40		39	5
				17	9		21	45											7	1		14	13		0	11
				70	5		11	3											11	0		17	7		3	30
				52	0		70	20											25	0		9	4		1	15
				85	25		8	35											2	10		78	2		2	20
				48	17		40	14											0	15		148	4		11	25
				37	3		0	30											3	12		82	32		26	4
				25	12		4	60											25	3		77	1		12	9
				52	0		86	15											25	0		43	3		26	5
				15	2		27	26											46	0		55	4		20	20
				17	2		39	20											20	0		56	1		20	5
				9	5		2	9											20	4		49	1		12	12
				39	0		53	6											20	7		41	2		15	14
				30	7		87	11											20	0		32	35		31	9
				52	5		21	15											21	2		50	5		6	30
				29	2		25	6											22	2		55	3		3	10
				12	0		34	4											23	0		29	2		3	8
				20	0		27	6											13	9		46	0		0	27
				93	26		61	7											50	4		41	2		11	20
				101	4		30	8											25	5		43	10		4	49
				66	1		36	9											15	3		23	3		44	7
				49	4		37	12											39	1		60	1		16	13
				48	12		35	2											21	0		33	4		27	3
				46	2		0	30											10	2		97	3		17	4
				36	3		11	35											14	0		115	2		4	12
				46	6		4	57											16	0		71	8		25	2
				58	3		42	20											11	0		56	2		16	10
				56	3		0	54										MEAN	21.4554	5.73927		36	3		16	10
				27	1		11	32										STDEV	17.5174	7.3436		17	2		1	17
				62	2		8	21														46	2		11	19
				93	5		8	63														41	3		24	2
				72	6		30	43														69	7		25	4
				22	2		8	8														65	0		8	17
				65	15		10	35														50	2		29	27
				26	2		3	39														36	2		35	1
				28	3		0	12														35	1		20	11
				59	2		1	22														98	6		24	7
				51	2		8	25														101	3		19	0
				96	1		165	3														133	30		20	4
				105	5		65	7														29	7		60	5
				2	45		34	0														86	3		20	2
				106	9		60	2														61	0		8	7
				55	16		45	10														49	0		60	11
				40	11		87	10														109	5		23	2
				128	5		39	2														43	1		25	45
				41	0		73	1														45	44		84	3
				30	40		53	1														11	3		15	10
				53	4		26	13														66	2		24	20
				41	3		20	5														51	2		11	6
				37	1		38	0														20	1		1	14
				36	3		51	4														63	2		2	6
				77	2		45	2														53	0		4	55
				27	4		7	64														13	10		13	1
				42	6		1	23														26	1		13	1
				47	0		3	35														37	4		11	30
				47	2		17	36														8	7		60	3
				35	5		8	15														1	7		7	12
				35	3		56	20														2	7		5	5
				60	11		25	25														7	2		15	5
				67	20		0	23														24	6		14	2
				100	11		36	12														12	9		6	27
				48	15		50	2														24	40		25	15
				44	9		62	1														40	7		31	1
				41	4		89	2														57	1		52	2
				25	89		50	0														56	3		10	14
				34	2		75	2														48	3		17	7
				28	7		49	2														19	1		30	3
				44	4		26	14														13	16		0	25
				31	1		33	3														30	0		3	45
				21	2		7	58														14	1		21	52
				60	2		75	43														45	1		1	20
				79	5		66	44														38	1		2	45
				34	8		29	34														17	8		1	58
				58	6		2	35														80	25		25	20
				25	48		67	11														50	2		40	5
				56	12		101	4														42	1		34	5
				58	0		75	31														37	0		11	1
				28	15		40	26														32	3		29	1
				26	6		65	8														28	2		34	5
				38	0		12	30														54	1		24	7
				56	1		14	45														35	2		7	20
				16	3		12	133														11	1		5	5
				22	0		3	53														28	1		39	5
				54	18		76	2														8	4		8	10
				25	5		36	0														16	1		21	15
				72	3		89	0														36	0		7	16
				15	0		36	7														63	2		35	20
				36	6		31	0														65	2		3	15
				34	1		57	12														46	13		15	7
				80	3		4	25														54	7		16	0
				16	13		12	43														4	8		13	3
				41	7		20	104														33	4	MEAN	30.8719	15.1717
				17	34		5	37														55	1	STDEV	27.3193	16.9601
				39	16		14	10														67	1
				32	34		18	8														67	2
				50	50		20	27														16	4
				2	14		0	14														48	2
				11	8		5	39														33	1
				10	3		21	38														31	5
			MEAN	42.16	7.72533		68	10														2	10
			STDEV	29.5955	10.8806		48	3														52	10
							50	0														27	0
							28	0														62	1
							88	1														4	6
							80	9														39	1
							25	4														40	30
							50	10														56	0
							44	2														79	3
							96	9														60	10
							7	57														21	12
							17	35														38	0
							3	50														84	1
							0	23														51	2
							25	31														47	0
							33	32														39	2
							44	5														11	2
							43	16														139	6
							54	7														72	2
							30	48														20	25
							31	6														52	2
							10	5														31	1
							4	88														42	3
							4	26														22	5
							12	59														12	3
							70	70														27	1
							13	14														56	0
							2	79														109	6
							5	47														55	0
							5	16														51	9
							7	53														59	0
							18	16														52	4
							31	1														56	1
							59	15														8	4
							76	0														15	4
							60	2														28	0
							40	8														21	2
							30	46														51	2
							6	70														22	0
							0	3														148	2
							40	11														51	2
							4	17														11	10
							6	35														4	1
							6	17														22	0
							0	12														19	4
							85	0														7	4
							67	5														9	2
							15	4														6	7
							9	5														16	25
						MEAN	28.0873	16.9292														36	1
						STDEV	27.0617	18.709														44	2
																						13	0
																						20	0
																						27	0
																						5	4
																						12	0
																						23	25
																						63	7
																						51	0
																						84	3
																						34	1
																						17	1
																						35	1
																						90	2
																						9	2
																						61	10
																						55	2
																						19	30
																						20	4
																						30	3
																						26	7
																						113	0
																						50	2
																						50	0
																						105	2
																						35	10
																						64	3
																						51	0
																						17	30
																						39	2
																						67	6
																						25	58
																						83	6
																						11	51
																						46	1
																						204	7
																						56	0
																						52	2
																						57	3
																						74	6
																						84	3
																						62	0
																						57	1
																						40	0
																						40	0
																						41	2
																						77	2
																						68	6
																						38	8
																						30	35
																						9	10
																						89	7
																						61	4
																						78	2
																						29	20
																						31	7
																						14	5
																						18	4
																						31	4
																						67	4
																						95	4
																					MEAN	45.714	6.08642
																					STDEV	30.3789	9.56113

## Sheet: 2C
Uninduced	InTFF1	InTFF3		1HR	InTFF1	InTFF3		3HR	InTFF1	InTFF3
	2	14			40	49			2	7
	32	1			81	17			8	20
	7	10			59	46			7	9
	0	2			85	5			52	3
	4	6			36	2			51	6
	0	3			89	4			28	4
	10	11			70	31			16	20
	39	13			50	3			120	5
	23	20			20	1			30	1
	35	0			33	11			103	2
	22	14			62	3			58	16
	10	0			52	3			29	6
	24	6			70	2			46	3
	10	1			10	9			33	3
	42	12			33	6			80	1
	24	5			44	3			60	2
	29	4			42	4			33	7
	18	1			27	2			73	10
	15	3			33	1			48	1
	16	2			47	0			67	0
	58	9			6	15			30	1
	12	1			1	10			49	3
	6	0			6	36			71	1
	7	1			16	15			200	6
	12	5			122	2			90	3
	20	0			18	2			90	10
	9	6			43	0			35	4
	13	2			10	22			45	0
	6	0			7	28			29	6
	25	0			20	17			60	7
	9	2			34	3			45	25
	9	3			46	7			11	14
	25	1			85	19			20	30
	6	0			64	2			30	25
	17	1			51	0			42	25
	11	3			70	5			7	11
	16	0			56	5			17	16
	3	6			90	3			7	8
	13	9			93	8			25	25
	3	15			48	1			27	32
	26	21			94	5			35	25
	65	1			209	13			25	18
	41	0			64	4			18	36
	38	0			52	2			61	13
	11	5			33	0			40	14
	31	2			103	3			45	8
	24	0			36	3			50	1
	18	2			21	0			40	3
	70	4			43	0			34	6
	19	5			28	1			111	4
	18	4			22	1			100	1
	23	4			57	33			68	6
	67	3			30	0			43	8
	28	3			30	4			21	6
	15	1			40	45			63	1
	31	1			42	13			0	8
	12	5			22	0			15	29
	22	5			16	25			11	13
	18	3			61	22			14	20
	45	4			48	2			25	0
	19	2			40	1			42	0
	23	0			34	0			80	13
	9	0			35	1			26	1
	8	2			69	26			22	11
	26	2			34	4			16	40
	7	2			15	2			51	13
	31	13			38	0			10	45
	28	25			54	2			5	20
	39	0			38	5			27	2
	40	2			58	3			25	8
	14	0			38	4			12	30
	23	0			17	6			33	4
	13	3			10	10			8	20
	3	1			30	0			17	20
	12	17			61	4			32	0
	15	7			41	1			4	6
	32	1			30	5			17	6
	18	2			20	0			58	8
	15	0			24	13			44	2
	0	19			95	0			81	3
	3	11			67	8			54	2
	5	1			32	5			62	7
	3	14			65	4			7	10
	0	5			41	1			28	0
	0	1			17	1			28	1
	6	4			13	6			3	25
	2	4			32	4			39	3
	13	7			43	8			29	4
	3	4			40	1			29	1
	14	3			56	2			15	25
	33	0			28	1			32	0
	44	1			39	2			30	3
	22	1			42	3			27	86
	19	0			19	1			21	50
	20	1			45	3			40	45
	20	2			21	0			75	4
	6	2			24	1			90	2
	48	3			6	13			11	22
	19	2			19	0			16	16
	44	5			24	0			25	41
	38	6			9	13			11	44
	15	4			23	4			29	28
	7	21			16	3			59	30
	15	47			17	3			3	11
	46	5			14	20			83	7
	40	0			28	1			5	119
	36	9			33	1			62	108
	34	13			89	4			40	15
	27	5			19	0			38	23
	34	2			21	18			15	40
	114	5			20	3			29	33
	30	0			23	0			15	55
	27	4			45	2			27	39
	35	22			30	1			210	13
	12	35			38	1			46	31
	17	4			46	2			2	16
	24	0			14	0			30	37
	9	0			27	1			35	48
	0	15			52	5			15	58
	3	8			79	7			25	38
	2	1			23	0			25	7
	0	5			26	0			96	20
	5	21			65	2			20	16
	19	18			83	8			30	9
	12	3			23	9			78	15
	27	13			24	1			12	18
	33	5			36	6			26	35
	13	0			58	3			7	36
	19	2			43	2			27	30
	12	3			44	3			23	40
	22	0			61	1			26	37
	33	2			26	2			115	47
	49	3			108	3			55	14
	22	0			37	2			40	0
	54	3			40	4			50	3
	40	4			63	2			50	40
	16	4			91	3			73	5
	58	12			28	1			69	8
	42	1			0	3			55	8
	31	0			48	3			94	2
	43	2			61	3			47	7
	24	6			8	8			47	8
	16	3			5	25			10	61
	93	1			4	40			20	35
	17	3			41	2			2	15
	29	24			71	4			10	28
	19	12			43	1			50	120
	48	3			57	7			35	20
	66	9			42	3			16	30
	11	6			53	3			20	13
	78	16			28	2			10	23
	69	6			49	2			3	17
	8	3			43	1			20	30
	25	5			38	0			35	25
	11	7			25	1			35	45
	15	6			26	0			35	24
	3	0			34	5			25	14
	24	0			27	4			13	25
	27	1			31	3			20	35
	55	1			58	16			25	12
	15	4			53	5			25	4
	9	2			116	5			28	4
	6	2			62	2			13	20
	4	1			114	4			22	20
	0	21			112	13			111	3
	1	14			84	9			60	5
	0	3			71	6			40	4
	3	18			51	5			45	30
	6	9			71	0			84	4
	11	1			45	3			14	45
	12	1			77	4			35	1
	6	3			60	1			13	14
	11	0			74	4			23	3
	7	0			132	6			1	11
	9	1			26	4			23	11
	19	4			26	14			29	14
	16	0			52	3			26	11
	21	4			166	6			45	10
	2	0			65	5			41	2
	32	2			92	41			33	4
	50	7			48	2			40	4
	56	1			54	4			46	0
	10	0			56	7			60	0
	30	4			99	16			59	2
	15	7			34	9			25	20
	23	8			46	1			47	1
	27	2			34	45			2	62
	22	1			32	1			30	25
	15	2			71	10			30	20
	15	0			51	4			12	20
	46	1			108	4			23	20
	30	5			90	1			55	5
	13	4			141	14			70	3
	33	11			78	4			47	4
	12	21			21	0			25	0
	31	1			12	0			25	10
	24	26			53	5			0	23
	3	32			70	1			2	25
	12	5			67	6			10	35
	37	2			61	2			25	29
	18	14			107	0			14	30
	26	8			66	1			5	20
	70	3			70	0			10	37
	14	4			23	8			53	1
	6	7			53	1			13	30
	8	1			40	0			38	0
	9	6			40	4			37	0
	11	4			19	2			55	7
	16	7			35	1			20	30
	3	29			52	0			6	25
	0	32			16	0			25	34
	6	19			52	7			22	1
	5	11			25	3			0	40
	5	9			127	4			56	3
	0	12			36	1			20	15
	6	7			42	3			50	5
	1	10			60	1			17	10
	5	2			45	3			43	3
	18	2			40	20			63	39
	36	5			60	2			71	2
	48	4			37	2			101	3
	37	27			37	1			107	7
	21	1			28	14			27	12
	9	2			50	45			66	10
	20	0			68	1			39	21
	22	4			30	1			22	0
	18	1			75	0			10	20
	4	16			49	5			30	15
	27	4			61	2			5	30
	9	8			11	4			18	24
	4	4			26	2			58	3
	3	11			24	1			13	30
	36	0			14	4			25	24
	79	3			11	2			19	50
	42	7			0	3			40	11
	29	2			25	60			3	40
	7	6			0	45			85	6
	42	9			46	1			25	35
	14	1			117	2			54	15
	34	7			53	9			33	5
	43	4			25	30			50	5
	42	3			23	17			75	7
	9	5			86	4			16	30
	15	5			74	4			4	15
	19	4			64	0			3	12
	4	45			70	3			0	15
	10	2			55	2			39	5
	21	14			34	30			0	11
	25	0			4	5			3	30
	22	0			4	9			1	15
	37	5			31	1			2	20
	27	7			60	2			11	25
	29	3			60	0			26	4
	9	2			40	4			12	9
	19	3			44	0			26	5
	16	11			60	2			20	20
	18	2			39	0			12	12
	11	0			160	22			15	14
	2	16			11	4			31	9
	0	13			42	1			6	30
	6	6			78	2			3	10
	29	1			35	4			3	8
	53	5			5	9			0	27
	6	11			18	40			11	20
	40	2			14	13			4	49
	13	33			17	7			44	7
	6	0			9	4			16	13
	38	1			78	2			27	3
	20	1			148	4			4	12
	0	4			82	32			25	2
	0	15			77	1			16	10
	38	15			43	3			16	10
	67	2			55	4			1	17
	14	15			56	1			11	19
	18	10			49	1			24	2
	65	1			41	2			25	4
	28	1			32	35			8	17
	7	1			50	5			29	27
	11	0			55	3			35	1
	25	0			29	2			20	11
	2	10			46	0			24	7
	0	15			41	2			60	5
	3	12			43	10			8	7
	25	3			23	3			60	11
	25	0			60	1			23	2
	46	0			33	4			25	45
	20	0			97	3			84	3
	20	4			115	2			15	10
	20	7			71	8			24	20
	20	0			56	2			11	6
	21	2			36	3			1	14
	22	2			17	2			2	6
	23	0			46	2			4	55
	13	9			41	3			11	30
	50	4			69	7			60	3
	25	5			65	0			7	12
	15	3			50	2			6	27
	39	1			36	2			25	15
	21	0			35	1			31	1
	10	2			98	6			52	2
	14	0			101	3			10	14
	16	0			133	30			17	7
	11	0			29	7			30	3
	18	0			86	3			0	25
	23	1			61	0			3	45
	25	1			49	0			21	52
	19	0			109	5			1	20
	51	1			43	1			2	45
	22	0			45	44			1	58
	40	0			11	3			25	20
	75	0			66	2			40	5
	31	2			51	2			34	5
	18	0			20	1			29	1
	29	1			63	2			34	5
	19	0			53	0			24	7
	23	0			13	10			7	20
	49	2			26	1			39	5
	21	1			37	4			8	10
	29	0			8	7			21	15
	21	0			1	7			7	16
	18	0			2	7			35	20
	27	0			7	2			3	15
	3	8			24	6			15	7
	2	7			12	9			21	1
	4	20			24	40			8	1
	0	19			40	7			10	2
	20	9			57	1			19	4
	21	18			56	3			16	0
	31	8			48	3			19	0
	31	10			30	0			20	5
	21	8			14	1			13	4
	1	5			45	1			6	5
	0	11			38	1			17	2
	9	10			17	8			20	2
	19	2			80	25			1	5
	27	1			50	2			13	0
	26	6			42	1			0	4
	29	0			37	0			14	3
	17	0			32	3			17	5
	18	0			28	2			8	5
	16	0			54	1			15	2
	29	0			35	2			13	1
	33	2			11	1			12	1
	8	51			28	1			7	5
	21	0			8	4			21	5
	15	6			16	1			12	1
	29	2			36	0			21	2
	22	0			63	2			10	2
	27	0			65	2			20	5
	37	0			46	13			17	4
	21	0			54	7			19	0
	18	0			4	8			20	4
	26	0			33	4			20	2
	23	4			55	1			13	1
	18	0			67	1			17	45
	25	4			67	2			27	15
	17	0			16	4			28	18
	0	5			48	2			12	20
	14	46			33	1			70	7
	0	4			31	5			38	1
	0	13			2	10			11	64
	15	6			52	10			72	7
	18	1			27	0			28	11
	25	0			62	1			11	23
	16	0			4	6			18	7
	32	5			39	1			8	49
	16	4			40	30			40	18
	11	11			56	0			0	46
	25	0			79	3			66	14
	22	0			60	10			33	60
	70	2			21	12			34	14
	35	0			38	0			31	24
	16	0			84	1			39	0
	0	5			51	2			76	4
	1	4			47	0			54	2
	39	2			39	2			18	19
	33	0			11	2			4	17
	53	0			139	6			12	14
	50	2			72	2			40	103
	25	0			20	25			25	11
	16	0			52	2			9	40
	18	0			31	1			112	3
	24	0			42	3			56	11
	13	10			22	5			64	10
	30	0			12	3			58	2
	68	13			27	1			20	7
	3	4			56	0			77	1
	3	4			109	6			23	34
	26	0			55	0			1	8
	12	6			51	9			55	15
	16	23			59	0			14	48
	32	13			52	4			44	10
	25	0			56	1			62	11
	17	4			8	4			62	2
	17	10			15	4			19	8
	15	11			28	0			77	28
	26	4			21	2			22	13
	17	7			51	2			32	12
	35	2			22	0			15	30
	1	5			148	2			77	10
	16	0			51	2			36	52
	42	4			11	10			19	54
	12	8			4	1			13	21
	10	13			22	0			36	5
	2	5			19	4			70	3
	8	4			7	4			58	0
	38	0			9	2			0	40
	16	1			6	7			30	20
	24	3			16	25			65	0
	19	1			36	1			53	0
	21	1			44	2			7	60
	0	5			13	0			22	5
	37	1			20	0			50	0
	24	4			27	0			35	1
	7	7			5	4			80	0
	20	8			12	0			6	42
	12	20			23	25			20	26
	13	1			63	7			42	2
	13	0			51	0			35	24
	10	0			84	3			23	35
	11	0			34	1			73	0
	6	0			17	1			71	1
	0	1			35	1			40	0
	8	1			90	2			35	35
	7	1			9	2			22	1
	10	1			61	10			1	30
	0	3			55	2			91	4
	2	2			19	30			25	69
	1	1			20	4			14	35
	7	1			30	3			19	21
	6	0			26	7			90	0
	6	1			113	0			77	10
	11	0			50	2			23	27
	5	0			50	0			50	4
	9	0			105	2			47	2
	15	0			35	10			57	0
	5	1			64	3			27	4
	8	1			51	0			53	0
	8	0			17	30			27	2
	12	0			39	2			4	40
	13	2			67	6			44	2
	2	0			25	58			75	9
	9	0			83	6			80	6
	15	0			11	51			78	4
	11	3			46	1			2	9
	6	1			204	7			17	8
	13	0			56	0			52	5
	10	0			52	2			35	1
	8	0			57	3			15	40
	0	1			74	6			6	35
	10	0			84	3			31	12
	3	0			62	0			3	25
	4	1			57	1			1	35
	4	2			40	0			45	10
	11	0			40	0			43	5
	15	0			41	2			60	1
	9	1			77	2			6	5
	6	1			68	6			7	30
	12	0			38	8			9	9
	9	0			30	35			31	9
	10	0			9	10			17	82
	14	0			89	7			6	14
	1	2			61	4			1	7
	3	1			78	2			8	23
	0	3			29	20			17	23
	0	3			31	7			7	44
	0	2			14	5			2	20
	5	1			18	4			25	34
	10	0			31	4			1	3
	6	0			67	4			25	43
	9	0			95	4			28	4
	6	0			29	22			50	47
	1	0			45	0			40	31
	1	2			61	0			38	30
	8	0			84	1			17	31
	10	1			53	1			61	15
	4	3			1	14			19	5
	8	1			59	0			21	29
	4	1			33	0			33	9
	12	0			77	3			18	4
	12	0			18	42			2	4
	13	2			18	2			61	12
	12	1			25	28			97	48
	10	3			44	14			10	31
	13	0			61	2			4	1
	15	0			19	0			5	4
	14	0			49	0			24	37
	10	0			15	34			2	3
	7	3			61	12			7	6
	11	0			23	2			11	7
	14	0			28	3			20	35
	10	0			26	35			3	7
	9	0			7	9			5	0
	5	3			40	5			31	1
	3	0			45	3			16	0
	4	0			21	2			17	2
	5	0			132	0			10	5
	12	0			9	9			10	3
	11	2			46	0			2	28
	8	3			55	3			5	0
	8	3			102	4			34	46
	3	2			68	0			36	0
	11	1			64	0			8	31
	0	2			43	0			62	11
	0	2			41	0			11	12
	4	1			71	0			23	1
	0	0			41	0			4	21
	3	1			31	1			2	0
	9	0			28	4			17	2
	9	0			47	0			11	0
	7	0			90	0			79	4
	10	2			50	0			11	72
	5	0			83	0			14	24
	7	0			43	10			11	11
	10	0			25	0			2	8
	6	0			19	0			39	1
	10	0			1	37			9	7
	13	2			11	19			21	0
	12	1			4	10			55	3
	6	1			11	15			50	5
	6	0			16	20			23	2
	14	0			7	17			41	3
	8	2			16	15			34	4
	2	1			33	0			8	0
	2	9			36	25			6	6
	26	5			64	0			34	0
	3	9			45	1			128	12
	51	7			84	0			50	0
	23	0			20	23			80	4
	40	5			24	2			98	4
	26	1			11	9			21	18
	26	13			39	5			29	4
	57	0			104	0			71	2
	28	3			129	13			21	10
	30	0			82	24			64	3
	23	0			47	25			88	12
	32	9			79	6			27	4
	35	6			25	35			50	20
	39	13			57	0			29	3
	25	3			177	2			163	0
	18	9			47	4			2	30
	11	9			78	0			0	32
	4	8			11	17			2	33
	35	6			31	0			16	17
	30	6			44	2			25	29
	22	8			73	9			72	57
	38	3			37	0			60	41
	34	0			87	3			64	0
	24	0			27	0			40	3
	43	16			37	0			20	62
	36	5			38	0			19	19
	55	6			15	9			25	10
	50	2			20	0			75	13
	41	9			43	7			13	10
	42	36			143	6			23	27
	36	12			62	6			30	0
	40	11			81	2			39	1
	4	12			35	13			30	32
	12	17			77	0			48	4
	24	5			57	0			138	5
	23	8			89	0			41	17
	25	4			42	0			53	7
	80	4			6	22			26	40
	21	7			152	6			4	26
	23	12			37	1			20	15
	45	3			40	0			8	21
	28	0			25	3			3	44
	44	5			44	3			0	53
	16	25			28	1			6	40
	21	34			102	1			15	16
	42	6			52	2			6	14
	21	8			77	0			3	19
	45	3			98	1			0	14
	7	28			87	1			13	45
	3	8			20	0			2	4
	4	7			39	10			31	7
	1	6			46	2			0	28
	50	7			30	0			2	17
	65	2			57	0			69	0
	45	9			97	0			59	2
	45	3			5	10			59	15
	28	22			37	0			55	7
	41	2			53	0			86	2
	27	2			47	0			45	5
	33	2			70	0			31	4
	60	0			40	0			30	27
	43	0			32	0			8	8
	40	4			67	21			29	78
	38	0			65	0			15	98
	39	3			38	0			25	35
	40	0			109	0			21	45
	45	0			49	2			11	3
	25	6			35	0			70	20
	14	30			31	1			8	35
	32	0			100	3			40	14
	46	10			159	3			0	30
	54	1			93	1			4	60
	16	8			93	6			86	15
	23	2			133	13			27	26
	7	7			116	4			8	8
	1	12			109	8			10	35
	11	14			78	1			3	39
	7	6			167	0			0	12
	2	7			101	2			1	22
	16	0			67	0			8	25
	9	2			107	0			165	3
	2	0			52	2			65	7
	2	3			135	3			34	0
	0	5			70	0			60	2
	4	3			18	3			45	10
	17	0			11	0			45	2
	3	0			25	0			7	64
	11	0			16	0			1	23
	3	2			113	33			3	35
	3	4			21	10			17	36
	13	2			15	4			8	15
	18	0			112	17			56	20
	9	0			126	10			25	25
	16	0			60	9			0	23
	16	2			9	5			36	12
	8	3			125	12			50	2
	20	2			62	3			62	1
	15	0			59	1			101	4
	8	2			20	17			75	31
	17	0			110	11			40	26
	9	3			75	23			65	8
	4	0			29	0			12	30
	9	0			131	0			14	45
	8	2			46	19			12	133
	6	0			80	17			3	53
	5	1			48	11			12	43
	3	1			0	12			20	104
	0	0			13	5			5	37
	1	3			8	11			14	10
	22	3			72	0			18	8
	7	0			2	4			20	27
	8	3			98	3			0	14
	22	0			140	5			5	39
	10	1			28	0			21	38
	10	0			31	2			68	10
	10	3			55	7			96	9
	20	1			57	7			7	57
	12	0			104	12			17	35
	20	1			29	2			3	50
	10	0			5	1			0	23
	20	0			25	0			25	31
	20	2			33	0			33	32
	19	0			50	2			44	5
	20	2			85	25			43	16
	16	4			48	17			54	7
	20	2			37	3			30	48
	15	0			25	12			31	6
	13	0			52	0			10	5
	10	0			15	2			4	88
	9	3			17	2			4	26
	18	0			9	5			12	59
	14	5			39	0			70	70
	20	2			30	7			13	14
	16	0			52	5			2	79
	12	0			29	2			5	47
	4	2			20	0			18	16
	22	4			27	4			31	1

## Sheet: 2E_2G
Repeat1									Repeat2									Repeat3
Uninduced	InTFF1	ExTFF1	1HR	InTFF1	ExTFF1	3HR	InTFF1	ExTFF1	Uninduced	InTFF1	ExTFF1	1HR	InTFF1	ExTFF1	3HR	InTFF1	ExTFF1	Uninduced	InTFF1	ExTFF1	1HR	InTFF1	ExTFF1	3HR	InTFF1	ExTFF1
	1	153		18	241		21	165		2	36		1	84		13	198		21	289		54	146		74	412
	1	72		2	120		10	218		1	98		2	405		27	484		56	1177		13	111		24	494
	2	225		1	68		2	282		3	11		25	412		18	430		18	891		3	115		4	1123
	1	202		0	157		3	233		1	76		13	655		1	523		2	406		28	301		34	900
	24	219		123	535		101	806		14	37		105	512		83	602		70	526		19	279		17	225
	22	200		102	389		82	754		1	66		83	612		103	267		1	288		38	299		9	378
	26	339		55	700		85	782		0	113		66	422		23	359		1	702		13	278		28	324
	7	154		2	152		15	808		0	145		50	310		56	501		10	453		12	228		18	345
	2	142		10	155		70	832		1	116		55	367		20	331		8	297		42	435		3	599
	2	112		2	169		6	612		1	151		13	199		22	318		29	557		2	122		3	471
	0	102		21	520		7	610		0	34		46	306		8	233		16	523		22	212		42	408
	1	126		15	239		6	518		0	5		86	399		3	225		0	155		78	516		44	329
	45	455		3	164		10	437		2	29		1	125		3	223		3	163		11	334		1	352
	10	184		2	172		6	624		1	87		4	141		1	370		0	315		23	302		5	745
	1	94		50	562		2	96		0	67		37	214		2	193		1	129		16	209		1	234
	0	101		54	452		23	407		0	103		56	208		4	263		2	144		83	501		24	265
	4	68		28	763		5	620		1	31		51	222		5	323		3	344		45	307		8	245
	1	535		30	443		11	574		0	11		10	212		51	712		16	423		89	390		2	240
	2	119		92	395		3	356		3	344		1	166		40	319		26	402		56	391		2	141
	3	209		19	362		2	367		2	312		8	140		15	321		0	224		26	299		37	303
	2	207		50	590		2	508		8	745		29	156		5	255		2	388		167	1269		53	388
	4	744		22	336		2	573		18	569		2	231		4	344		27	677		81	966		12	325
	2	141		30	477		15	340		4	141		31	281		26	878		5	234		67	512		11	111
	18	259		65	503		5	240		29	306		110	502		55	723		1	381		1	218		2	78
	42	422		4	304		0	143		2	156		47	555		63	812		5	145		109	379		2	65
	33	321		6	56		29	430		2	239		97	401		26	555		3	112		81	407		15	153
	0	214		108	547		65	772		1	370		4	187		31	655		77	467		104	513		1	145
	7	710		52	684		21	666		18	508		0	188		4	508		32	276		10	261		4	212
	2	328		44	550		5	279		45	507		1	221		27	388		2	246		33	199		4	152
	2	763		108	599		1	163		15	546		5	211		2	277		41	539		45	273		9	263
	1	259		48	537		5	565		0	112		77	302		4	299		25	507		5	70		11	403
	2	132		75	629		46	609		1	60		14	401		22	1010		2	350		11	307		54	348
	3	399		26	474		3	494		1	456		18	195		50	887		2	376		5	366		51	282
	1	360		91	771		9	425		11	278		21	188		12	333		2	366		22	255		55	346
	6	32		45	302		9	512		39	166		10	191		0	309		4	233		18	111		42	567
	1	31		92	625		34	747		34	254		153	307		67	815		6	124		34	434		25	454
	1	149		85	638		21	782		1	277		1	177		20	399		1	299		3	213		11	136
	2	102		70	638		2	631		1	96		39	287		2	842		0	213		30	546		41	319
	0	428		37	238		2	372		14	550		116	366		31	297		1	190		50	273		85	412
	3	377		34	347		11	362		7	523		114	293		4	255		15	212		83	607		4	168
	20	431		121	620		22	665		31	467		58	402		44	278		11	144		1	211		0	140
	40	543		34	419		12	413		1	455		51	218		10	322		9	167		127	393		4	311
	25	792		103	561		101	518		5	377		15	256		17	366		0	211		75	398		17	302
	3	152		62	456		11	455		2	312		8	155		69	401		5	187		176	905		13	353
	8	607		99	380		2	411		4	95		3	199		0	190		2	88		99	591		49	222
	29	644		56	362		77	524		1	286		118	223		31	277		0	119		182	456		69	242
	5	655		66	459		35	583		0	88		30	131		21	281		5	161		91	555		20	277
	12	646		68	451		39	533		1	308		23	122		14	267		9	450		64	408		10	256
	6	185		92	562		1	146		0	244		90	403		20	543		1	382		2	99		4	388
	0	224		57	733		1	86		0	122		24	131		14	344		10	177		14	108		2	78
	45	529		101	876		11	141		1	88		23	205		20	1167		1	301		17	123		33	456
	28	251		67	492		87	438		1	66		9	355		16	396		2	56		1	69		74	537
	5	243		10	246		101	493		2	163		3	123		64	746		1	132		4	188		7	265
	0	92		1	150		19	704		3	207		13	277		1	288		1	214		21	223		24	269
	2	133		30	456		33	724		1	102		5	167		19	488		15	215		61	546		27	389
	1	108		76	720		3	655		14	194		101	1059		122	1099		1	477		56	290		1	117
	2	111		11	278		69	729		12	198		109	1077		1	167		2	323		93	872		54	401
	14	222		61	436		19	560		3	211		34	283		2	209		3	388		40	323		8	316
	5	275		40	364		65	409		2	133		16	477		19	234		10	255		124	309		2	199
	11	322		52	184		41	599		56	499		21	504		21	366		4	212		22	212		41	380
	5	279		22	313		81	523		2	187		20	346		2	171		1	56		44	455		57	500
	1	504		7	362		62	796		2	243		36	677		42	412		0	88		45	270		3	167
	0	211		25	210		106	711		0	287		40	235		27	426		1	565		110	396		1	278
	1	285		75	499		4	500		15	277		25	228		35	751		1	321		39	345		1	165
MEAN	8.67188	291.141		102	684		5	360		35	224		95	322		0	366		1	198		22	245		2	93
STDEV	12.2307	199.597		32	455		41	582		1	138		87	305		50	923		2	325		102	399		2	200
				64	459		52	759		2	359		36	204		88	769		2	397		35	466		11	534
				110	665		29	314		1	66		99	684		101	912		3	178		2	183		0	208
				107	518		4	264		0	145		2	156		3	412		2	303		1	144		1	304
				107	700		11	656		0	42		11	277		4	456		14	246		14	166		4	212
				88	509		12	766		2	255		61	316		4	213		38	366		7	182		1	412
				109	540		17	885		1	112		15	266		1	288		29	312		141	451		3	345
				122	874		5	377		2	97		1	114		11	602		2	132		150	478		3	301
				45	432		1	618		1	95		2	155		3	858		2	99		91	387		6	345
				120	501		15	871		1	103		40	266		74	502		1	191		133	869		62	889
				123	718		41	677		1	88		33	388		1	501		1	104		108	597		126	746
				154	590		58	123		1	152		22	344		1	555		1	129		190	855		3	308
				92	768		69	764		3	122		45	539		5	578		0	80		83	642		42	546
				102	763		51	656		2	111		2	122		0	327		1	69		46	546		24	299
				121	527		11	403		2	89		65	255		21	555		1	83		26	158		22	401
				103	712		42	742		1	165		14	416		12	377		1	121		70	563		11	222
				35	589		11	723		0	99		77	522		0	125		2	169		24	277		3	296
				43	509		12	295		2	174		2	492		1	111		8	178		1	205		1	467
				9	249		58	344		19	244		30	366		1	412		1	132		3	137		26	432
				23	514		48	409		34	277		67	345		2	501		19	227		40	488		10	278
				19	439		2	345		1	134		45	199		2	555		20	255		81	436		2	223
				34	519		2	254		22	369		8	233		1	671		28	286		7	189		9	299
				21	560		32	484		1	78		13	232		12	945		17	214		34	192		1	262
				36	762		6	267		3	132		59	296		25	967		109	488		60	387		29	332
				24	580		38	372		3	231		4	388		19	912		34	306		54	265		1	816
				99	581		2	428		2	177		17	322		18	931		28	289		87	455		1	129
				47	111		99	804		1	87		85	423		15	412		5	261		7	377		4	446
				38	144		112	690		0	176		76	213		2	111		23	298		0	150		7	263
				35	236		2	357		1	123		4	226		2	56		30	136		0	234		1	211
				55	645		53	550		0	111		46	394		0	112		6	139		19	309		6	281
				75	411		11	404		3	288		50	745		11	155		24	423		30	145		8	331
				83	617		112	639		0	152		53	1033		12	199		1	134		34	504		55	611
				51	460		4	640		23	138		125	1130		1	233		21	412		32	345		6	345
				13	122		22	755		27	182		39	349		11	155		5	298		43	229		11	512
				11	204		4	196		25	176		38	246		0	145		2	123		54	243		68	1132
				8	97		5	172		1	157		51	546		15	229		1	233		44	355		0	255
				7	915		15	573		1	75		2	124		19	234		3	288		4	231		60	918
				5	207		62	591		5	144		2	146		0	168		2	126		1	164		53	583
				32	542		18	392		4	188		13	427		18	177		1	205		0	238		40	629
				65	722		1	306		5	233		29	514		2	138		2	217		6	246		104	523
				14	239		4	391		1	142		1	114		2	113		2	143		33	340		22	445
				5	478		2	650		0	133		2	99		16	831		4	478		52	567		156	1122
				42	655		88	849		3	142		1	55		16	423		9	309		0	111		148	987
				43	467		88	606		3	70		4	305		66	576		33	266		5	145		188	955
				12	223		1	478		1	49		2	159		46	659		2	109		36	298		168	655
				79	420		2	297		3	77		16	402		50	693		18	243		34	445		70	766
				105	502		11	419		6	46		36	578		65	376		0	237		66	392		57	566
				12	289		22	535		27	314		2	302		16	388		1	305		39	225		158	655
				22	538	MEAN	28.0708	504.973		32	271		28	372		13	378		16	287		52	361		9	455
			MEAN	52.2807	457.482	STDEV	31.4701	200.43		42	72		151	981		40	413		71	202		1	155		1	344
			STDEV	38.1818	199.311					19	212		184	1697		28	487		16	315		22	318		4	387
										1	45		2	97		49	491		10	244		21	312		2	199
										38	405		23	169		23	499		3	185		11	155		2	200
										3	111		1	135		31	599		0	166		2	82		6	218
										0	56		1	367		2	611		2	204		0	97		18	333
										2	191		4	88		66	588		13	384		5	256		5	388
										1	44		27	254		16	545		17	172		98	566		4	189
										4	208		2	202		3	427		4	103		32	366		13	305
										1	293		1	391		66	1023		7	267		89	725		1	277
										39	367		1	90		36	698		8	213		55	479		40	372
										4	150		27	355		1	302		0	65		43	504		1	327
										4	184		19	147		9	299		3	234		89	845		5	421
										4	322		54	323		10	467		3	86		47	282		3	190
										4	388		40	412		8	677		1	245		32	543		7	254
										44	321		51	364		3	255		1	357		48	310		15	339
										6	56		78	448		3	501		0	190		65	510		77	1059
										46	287		16	194		8	338		9	107		87	722		74	549
										2	161		10	142		1	401		8	256		49	312		16	292
										2	208		14	150		1	329		4	90		22	612		5	253
										1	44		2	124		39	355		27	269		24	286		1	405
										3	88		85	366		6	149		4	144		53	245		2	587
										1	93		41	388		11	747		1	123		2	189		1	282
										33	211		48	345		2	480		0	51		7	319		2	128
										17	188		4	162		2	190	MEAN	10.2971	265.587		18	229		5	290
										27	556		16	147		9	285	STDEV	16.4421	162.751		1	164		2	360
										5	756		64	412		12	377					21	302		23	253
										2	918		137	678		2	421					0	204		64	889
										31	439		38	302		17	366					1	308		17	345
										9	288		85	654		47	799					0	87		9	487
										24	208		38	217		18	399					3	551		2	358
										20	262		9	355		11	451					0	223		4	432
										0	413		39	497		22	234					48	432		27	212
										1	111		21	416		35	477					113	452		101	845
										4	356		17	445		0	368					79	519		43	803
										3	417		21	762		8	402					49	567		4	425
										1	177		48	497		23	435					62	323		3	277
										2	45		33	807		23	556					60	326		12	388
										23	199		19	498		0	421					44	456		3	506
										56	212		59	678		46	345					39	344		13	756
										2	376		90	712		1	268					21	278		38	455
										26	217		88	786		58	749					31	299		10	355
										3	377		12	503		16	634					60	501		36	377
										1	201		22	821		28	466					6	386		30	644
										0	101		14	360		86	912					43	657		2	865
									MEAN	8.2956	210.226		2	345		49	788					85	442		49	675
									STDEV	12.7828	156.114		100	418		5	488					34	409		8	645
													93	413		19	755					63	487		51	444
													17	508		16	744					33	311		2	588
													34	410		78	1123					34	365		4	675
													27	706		10	1344					54	321		39	922
													34	718		45	833					143	491		1	501
													7	391		11	623					18	212		0	363
													33	549		1	344					48	412		2	366
													44	702		1	163					44	435		16	245
													32	736		20	988					42	602		33	755
													62	708		1	404					2	106		1	555
													41	747		19	464					59	489		22	976
													9	407		36	655					52	432		2	621
													4	618		1	280					133	399		5	455
													1	622		47	903					52	356		2	712
													154	923		2	520					54	150		2	645
													101	903		23	381					48	294		1	412
													103	699		1	347					1	44		49	987
													84	912		15	555					17	164		65	879
													71	555		3	403					187	734		5	652
													50	666		94	609					68	322		1	268
													8	455		101	1231					41	312		40	943
													9	477		0	376					25	599		4	248
													27	355		26	695					103	456		5	82
													68	472		66	1021					5	240		24	1068
													54	433		4	288					47	745		3	401
													12	242		3	199					60	317		1	66
													60	344		0	188					41	312		2	144
													37	755		2	112					61	398		3	135
													15	236		3	202					53	535		2	161
													1	83		10	299					151	712		19	387
													1	166		3	499					98	445		3	445
													128	795		41	322					7	123		23	521
													141	945		4	309					2	124		27	326
													17	601		3	302					100	367		22	450
													97	644		2	233					37	212		8	300
													58	677		26	191					69	275		0	168
													0	99		52	277					54	328		11	312
													5	134		48	299					93	411		2	286
													2	111		22	555					45	317		27	346
													76	841		92	923					5	329		34	655
													10	577		16	322					52	223		1	288
													80	755		6	488					41	455		1	308
													8	538		44	365					1	57		3	442
													6	200		29	401					1	75		55	1021
													67	856	MEAN	21.7951	466.132					10	234		25	342
													83	779	STDEV	24.8258	252.563					34	242		7	596
													50	467								7	116		3	611
													1	365								38	210		5	466
													4	603								68	345		41	689
													88	789								1	66		22	601
													40	967								3	123		21	675
													3	312								129	222		23	677
													7	198								43	164		1	183
													97	1045								49	112		2	555
													95	755								57	109		14	501
													3	214								34	212		11	233
													64	908								11	114		26	199
													20	187								27	378		1	151
													42	208								40	478		2	211
													99	999								83	566		7	280
													56	345								82	845		1	333
													2	138								47	912		3	342
													1	244								86	689		3	266
													15	225								24	312		48	823
													10	203								4	489		25	655
													1	180								20	635		10	556
													1	216								23	211		24	491
													5	169								22	167		7	271
													19	657								5	199		1	221
													108	856								77	291		34	455
													1	266								39	267		12	207
													137	632								44	539		5	113
													143	702								118	604		33	276
													45	766								50	666		57	299
													56	612								17	956		57	399
													69	399								18	475		6	99
													69	377								13	357		1	236
													56	512								86	727		33	299
													119	288								58	593		32	367
													87	301								50	654		0	111
													66	423								45	501		0	99
													27	235								125	757		11	208
													17	455								35	389		22	765
													126	505							MEAN	45.6189	363.865		4	301
													62	204							STDEV	40.0948	200.459		55	555
													49	307											20	199
													120	432											3	188
													65	311											12	699
													63	409											2	201
													29	303											3	204
												MEAN	41.0359	407.502											13	186
												STDEV	39.1317	251.41											53	589
																									25	498
																									39	612
																									15	612
																									53	645
																									26	713
																									82	703
																									50	377
																									21	401
																									62	458
																									59	112
																									4	432
																									3	412
																								MEAN	22.1547	414.472
																								STDEV	29.974	230.763

## Sheet: 2F_2H
Repeat1									Repeat2									Repeat3
Uninduced	InTFF3	ExTFF3	1HR	InTFF3	ExTFF3	3HR	InTFF3	ExTFF3	Uninduced	InTFF3	ExTFF3	1HR	InTFF3	ExTFF3	3HR	InTFF3	ExTFF3	Uninduced	InTFF3	ExTFF3	1HR	InTFF3	ExTFF3	3HR	InTFF3	ExTFF3
	9	98		8	54		8	10		5	45		24	38		21	80		0	76		1	6		16	99
	34	143		5	59		18	55		1	52		6	14		43	96		13	101		1	4		7	39
	1	51		21	143		4	9		0	45		2	17		1	20		10	79		2	33		8	56
	4	11		35	102		4	9		4	53		9	34		3	14		2	65		0	43		22	133
	1	60		3	50		1	25		1	15		5	23		63	125		0	12		0	29		8	40
	0	111		0	50		35	126		0	44		3	57		2	68		0	4		21	55		0	8
	7	122		0	47		10	25		0	13		4	53		1	43		0	26		1	15		8	26
	0	107		5	53		19	51		25	73		3	6		19	116		8	143		1	57		2	38
	1	100		0	108		2	8		11	21		2	15		26	82		12	106		25	241		22	42
	3	9		22	121		5	49		6	65		3	35		11	44		7	98		29	142		34	69
	7	12		1	25		1	22		4	22		5	26		12	144		0	77		2	76		1	55
	0	15		0	5		2	7		0	9		2	8		3	51		41	135		6	101		3	46
	2	9		8	46		7	44		0	5		3	120		1	23		1	99		1	55		15	82
	1	3		5	27		3	10		0	2		1	103		22	48		0	44		43	86		3	96
	11	35		5	51		19	52		0	14		21	164		1	51		0	34		0	7		53	293
	21	42		30	111		8	22		3	88		25	235		1	2		0	88		0	14		1	37
	11	37		3	106		28	178		0	13		12	133		2	15		0	79		0	26		2	41
	2	19		28	196		52	247		4	71		2	67		0	7		1	89		1	8		2	25
	2	17		0	66		32	171		1	48		2	57		1	1		0	15		14	102		29	38
	2	30		9	56		6	133		0	39		2	161		1	10		0	23		0	45		28	50
	0	5		3	53		1	41		0	70		1	46		3	16		0	19		0	55		1	35
	1	3		1	65		16	156		3	108		2	60		1	11		1	98		6	34		3	42
	0	41		4	191		11	65		5	21		23	143		7	20		0	3		8	19		1	37
	17	69		17	38		27	149		3	24		0	12		1	3		0	11		6	21		23	25
	5	89		6	26		15	198		0	1		2	6		1	2		2	58		3	20		6	12
	2	51		7	75		1	58		1	4		9	102		2	10		1	22		9	123		14	34
	5	61		0	14		65	65		0	66		0	10		1	4		0	17		2	117		1	31
	1	35		3	19		24	62		2	23		0	3		54	112		0	22		3	77		1	6
	0	157		0	69		49	77		2	15		1	20		15	115		1	8		0	89		5	6
	1	21		32	194		21	32		11	60		0	7		16	66		0	1		12	95		3	5
	0	24		18	205		5	40		5	42		5	87		23	51		4	64		10	47		41	69
	2	20		10	235		11	41		0	7		3	60		30	198		1	22		0	25		4	59
	1	10		7	111		1	11		5	72		9	98		16	132		0	22		2	50		0	3
	0	5		7	41		0	12		6	25		0	77		29	154		4	65		2	40		5	43
	1	5		1	13		1	32		0	15		2	23		11	216		4	60		1	108		1	32
	1	31		0	46		0	6		0	3		22	80		8	45		8	43		1	60		0	4
	0	17		0	44		0	34		0	4		21	55		25	47		1	26		0	34		4	32
	5	112		3	7		3	74		4	18		7	42		9	106		2	15		17	115		2	16
	2	19		27	48		0	11		29	83		3	67		32	92		1	39		0	42		0	1
	0	4		15	43		1	22		16	87		1	53		28	40		6	69		3	32		4	7
	1	40		6	37		1	22		6	51		12	41		92	141		11	35		2	128		0	3
	1	24		0	52		0	22		7	35		0	68		39	65		0	17		14	61		2	11
	2	10		0	3		32	44		0	19		0	91		22	66		1	35		23	57		19	27
	0	10		0	32		29	33		0	11		0	18		17	198		2	10		1	21		2	4
	0	20		30	32		18	45		0	12		0	41		33	167		1	4		1	57		0	9
	0	9		0	15		7	44		1	8		0	55		2	34		0	3		0	69		5	15
	3	17		1	2		0	12		3	22		14	145	MEAN	16.7872	67.8085		0	3		0	67		20	50
	0	11		0	31		0	10		4	20		2	121	STDEV	19.1197	58.5408		1	7		2	76		1	25
	0	3		17	345		2	52		1	55		2	135					4	22		19	156		2	39
	2	5		0	44		1	54	MEAN	3.65306	35.0612		3	67					0	7		0	10		0	0
	0	1		1	54		27	44	STDEV	5.94612	27.6167		11	89					1	8		0	51		11	11
	1	16		19	72		31	60					8	95					2	11		9	52		1	134
	0	7		9	47		16	108					18	67					1	4		8	75		30	66
	22	30		0	42		23	150				MEAN	5.98113	65.0943					2	17		0	22		43	90
	6	31		14	104		1	25				STDEV	7.23637	49.6636					0	7		1	6		1	64
	1	11		4	51		1	419											0	4		6	39		19	80
	2	14		0	40		18	44											2	37		1	37		11	51
	9	12		0	33		1	5											4	39		1	74		17	78
	0	11		2	116		19	20											6	33		18	136		22	52
	0	14		1	35		3	53											1	34		4	156		16	57
	0	19		3	35		22	39											21	197		7	188		1	83
	0	18		6	33		35	40											17	69		1	112		19	76
	0	14		7	26		7	23											0	41		0	11		32	78
	1	18		23	121		2	21											8	44		1	12		12	87
	0	1		28	96		66	115											4	22		12	55		3	43
	3	18		14	77		1	19											3	36	MEAN	5.6	62.7077		22	62
	0	35		5	58		32	39											0	15	STDEV	8.44985	48.3421		12	58
	1	35		1	4		19	60											8	42					1	123
	0	8		0	5		19	23											0	11					18	69
	0	18		5	48		0	34											6	17					1	59
	0	9		36	144		14	56											10	20					19	46
	1	7		0	7		0	10											12	43					58	77
	11	54		1	52		15	17											5	28					5	52
	12	25		0	11		1	6											2	34					21	65
	10	32		0	11		23	102											3	25					4	52
	21	26		0	41		0	7											12	45					19	79
MEAN	3.59211	32.1447		31	141		26	30											0	7					10	76
STDEV	6.2272	34.8833		18	156		31	47											7	25					22	77
				17	135		11	45											6	37					22	63
				0	70	MEAN	14.1358	55.5309											0	10					15	37
				0	64	STDEV	15.38	63.5673											0	25					35	62
				0	96														0	35					7	149
				6	108														8	24					1	47
				16	178														5	29					11	261
				0	123														5	36					2	154
				6	113														1	30					28	138
				0	123													MEAN	3.63953	39.0814					7	178
				0	59													STDEV	5.93279	35.741					3	208
				2	141																				7	107
				2	96																				14	70
				7	267																				41	113
				0	27																				17	158
				0	10																				14	134
			MEAN	7.3871	73.9355																				25	47
			STDEV	9.78134	62.6763																			MEAN	12.1667	61.4167
																								STDEV	12.6305	52.7891
