# Supplementary material for: Ligand-dependent enhancer activation indirectly modulates non-target promoters in a chromatin domain
Source: eLife. 2026 Jul 7;13:RP102417. doi: 10.7554/eLife.102417 (PMC13341115; doi:10.7554/eLife.102417)
Supplement: Figure 3—source data 1. [file elife-102417-fig3-data1.xlsx]

## Sheet: 3A_ETOH R1 
chr	start	end	position	type	fe_strand	fe_id	reads	normReads	norm4C
chr21	5103343	5103437	5103433	non_blind	3	13133862	1	0.463626	0.0220774
chr21	5145436	5146071	5145440	blind	5	13134039	0	0	0.0220774
chr21	5220122	5220353	5220126	non_blind	5	13134163	0	0	0.0220774
chr21	5222948	5223113	5222952	blind	5	13134173	0	0	0.0220774
chr21	5228642	5228738	5228646	blind	5	13134197	0	0	0.0220774
chr21	5229336	5229377	5229340	blind	5	13134209	0	0	0.0220774
chr21	5229336	5229377	5229373	blind	3	13134210	0	0	0.0220774
chr21	5231732	5231826	5231736	non_blind	5	13134229	0	0	0.0220774
chr21	5233024	5233072	5233028	non_blind	5	13134233	0	0	0.0220774
chr21	5248888	5249105	5248892	non_blind	5	13134297	0	0	0.0220774
chr21	5250828	5251023	5251019	non_blind	3	13134306	0	0	0.0220774
chr21	5251177	5251279	5251181	blind	5	13134309	0	0	5.0457e-14
chr21	5357816	5358118	5358114	blind	3	13134578	0	0	5.0457e-14
chr21	6505601	6505741	6505737	non_blind	3	13138004	0	0	5.0457e-14
chr21	6914194	6914476	6914472	non_blind	3	13139360	0	0	5.0457e-14
chr21	6916959	6917123	6916963	blind	5	13139369	0	0	5.0457e-14
chr21	7257866	7258588	7258584	blind	3	13140224	0	0	5.0457e-14
chr21	7258889	7259444	7259440	blind	3	13140230	0	0	5.0457e-14
chr21	7260535	7260657	7260539	non_blind	5	13140235	0	0	5.0457e-14
chr21	7915747	7916511	7915751	non_blind	5	13142157	0	0	5.0457e-14
chr21	7931900	7932159	7931904	blind	5	13142159	0	0	5.0457e-14
chr21	7936270	7937493	7937489	non_blind	3	13142166	0	0	5.0457e-14
chr21	7940051	7940240	7940055	non_blind	5	13142171	0	0	5.0457e-14
chr21	7942784	7943074	7943070	non_blind	3	13142174	0	0	5.0457e-14
chr21	7943071	7943607	7943075	non_blind	5	13142175	0	0	5.0457e-14
chr21	7947424	7951129	7951125	non_blind	3	13142176	0	0	5.0457e-14
chr21	7951126	7951474	7951130	non_blind	5	13142177	0	0	5.0457e-14
chr21	7957352	7958053	7958049	non_blind	3	13142194	0	0	5.0457e-14
chr21	7965157	7965376	7965372	blind	3	13142210	0	0	5.0457e-14
chr21	7965373	7965489	7965377	blind	5	13142211	0	0	5.0457e-14
chr21	7968072	7968213	7968076	non_blind	5	13142219	0	0	5.0457e-14
chr21	8049667	8049839	8049835	blind	3	13142268	0	0	5.0457e-14
chr21	8252433	8252537	8252533	blind	3	13142978	0	0	5.0457e-14
chr21	8252534	8252720	8252538	blind	5	13142979	0	0	5.0457e-14
chr21	8252717	8253854	8252721	blind	5	13142981	0	0	5.0457e-14
chr21	8255582	8255700	8255586	blind	5	13142997	0	0	5.0457e-14
chr21	8255697	8256328	8255701	blind	5	13142999	0	0	5.0457e-14
chr21	8550971	8551385	8550975	non_blind	5	13143913	0	0	5.0457e-14
chr21	8631360	8631551	8631364	non_blind	5	13144195	0	0	5.0457e-14
chr21	8759867	8760378	8760374	blind	3	13144472	0	0	5.0457e-14
chr21	8764174	8764739	8764178	non_blind	5	13144485	0	0	0.0220774
chr21	8772410	8772591	8772414	blind	5	13144535	0	0	0.0220774
chr21	8774739	8774791	8774743	non_blind	5	13144553	0	0	0.0220774
chr21	8781399	8781427	8781423	non_blind	3	13144586	0	0	0.0220774
chr21	8782282	8782366	8782286	blind	5	13144595	0	0	0.0220774
chr21	8812111	8812160	8812156	non_blind	3	13144746	0	0	0.0220774
chr21	8838651	8838721	8838655	non_blind	5	13144887	0	0	0.0220774
chr21	8988562	8988813	8988809	non_blind	3	13145090	0	0	0.0220774
chr21	8989952	8990115	8989956	non_blind	5	13145095	0	0	0.0220774
chr21	8990262	8990311	8990266	non_blind	5	13145097	0	0	0.0220774
chr21	8990883	8991004	8991000	non_blind	3	13145100	1	0.463626	0.0220774
chr21	8991397	8991621	8991617	non_blind	3	13145102	0	0	0.0220774
chr21	8991618	8991729	8991725	blind	3	13145104	0	0	0.0220774
chr21	8991735	8991934	8991739	non_blind	5	13145107	0	0	0.0220774
chr21	8993818	8994152	8994148	non_blind	3	13145108	0	0	0.0220774
chr21	8994149	8994228	8994153	non_blind	5	13145109	0	0	0.0220774
chr21	8994225	8994365	8994361	non_blind	3	13145110	0	0	0.0220774
chr21	8994362	8994417	8994366	non_blind	5	13145111	0	0	0.0220774
chr21	8994442	8994710	8994706	non_blind	3	13145112	0	0	0.0220774
chr21	8994707	8994954	8994711	blind	5	13145113	0	0	0.0220774
chr21	8994707	8994954	8994950	blind	3	13145114	0	0	0.0220774
chr21	8994951	8995017	8994955	non_blind	5	13145115	0	0	5.0457e-14
chr21	8995014	8995056	8995052	non_blind	3	13145116	0	0	5.0457e-14
chr21	8995053	8995298	8995057	non_blind	5	13145117	0	0	5.0457e-14
chr21	8995298	8995332	8995302	non_blind	5	13145119	0	0	5.0457e-14
chr21	8995329	8995437	8995433	non_blind	3	13145120	0	0	5.0457e-14
chr21	8995434	8995481	8995438	non_blind	5	13145121	0	0	5.0457e-14
chr21	8995478	8995513	8995509	non_blind	3	13145122	0	0	5.0457e-14
chr21	8995510	8995993	8995514	blind	5	13145123	0	0	5.0457e-14
chr21	8998885	8999107	8999103	non_blind	3	13145130	0	0	5.0457e-14
chr21	8999104	8999391	8999108	blind	5	13145131	0	0	5.0457e-14
chr21	8999388	8999475	8999392	non_blind	5	13145133	0	0	5.0457e-14
chr21	9001547	9001686	9001551	blind	5	13145145	0	0	5.0457e-14
chr21	9004335	9004392	9004388	non_blind	3	13145158	0	0	5.0457e-14
chr21	9007988	9008165	9008161	non_blind	3	13145174	0	0	5.0457e-14
chr21	9008678	9008897	9008682	blind	5	13145177	0	0	5.0457e-14
chr21	9008678	9008897	9008893	blind	3	13145178	0	0	5.0457e-14
chr21	9011154	9011781	9011777	blind	3	13145186	0	0	5.0457e-14
chr21	9014863	9015152	9014867	non_blind	5	13145205	0	0	5.0457e-14
chr21	9015149	9015271	9015267	non_blind	3	13145206	0	0	5.0457e-14
chr21	9015268	9015352	9015272	non_blind	5	13145207	0	0	5.0457e-14
chr21	9029149	9029236	9029232	non_blind	3	13145280	0	0	5.0457e-14
chr21	9071224	9071313	9071228	non_blind	5	13145419	0	0	5.0457e-14
chr21	9076068	9076191	9076072	non_blind	5	13145439	0	0	5.0457e-14
chr21	9091910	9091962	9091914	non_blind	5	13145495	0	0	5.0457e-14
chr21	9108501	9108654	9108650	blind	3	13145594	0	0	5.0457e-14
chr21	9120288	9120343	9120339	non_blind	3	13145654	0	0	5.0457e-14
chr21	9317769	9317800	9317773	non_blind	5	13146403	0	0	5.0457e-14
chr21	9363086	9363164	9363090	non_blind	5	13146661	0	0	5.0457e-14
chr21	9612574	9612769	9612765	non_blind	3	13147166	0	0	5.0457e-14
chr21	9647297	9647359	9647301	non_blind	5	13147341	0	0	5.0457e-14
chr21	9653003	9653022	9653018	non_blind	3	13147356	0	0	5.0457e-14
chr21	9656135	9656265	9656139	non_blind	5	13147375	0	0	0.242852
chr21	9699752	9699812	9699808	non_blind	3	13147548	0	0	0.242852
chr21	9699809	9699840	9699813	blind	5	13147549	0	0	0.242852
chr21	9699809	9699840	9699836	blind	3	13147550	0	0	0.242852
chr21	9699837	9699890	9699841	non_blind	5	13147551	0	0	0.242852
chr21	9699887	9699935	9699931	non_blind	3	13147552	0	0	0.242852
chr21	9722206	9722285	9722281	non_blind	3	13147628	0	0	0.242852
chr21	9722756	9722875	9722871	non_blind	3	13147634	0	0	0.242852
chr21	9725702	9726186	9726182	blind	3	13147652	0	0	0.242852
chr21	9728842	9728962	9728958	non_blind	3	13147668	0	0	0.242852
chr21	9739699	9739760	9739756	non_blind	3	13147684	11	5.09989	0.242852
chr21	9742407	9742518	9742514	non_blind	3	13147686	0	0	0.242852
chr21	9744811	9744999	9744815	blind	5	13147699	0	0	0.242852
chr21	9745367	9745614	9745371	non_blind	5	13147703	0	0	0.242852
chr21	9746578	9746722	9746718	non_blind	3	13147706	0	0	0.242852
chr21	9747612	9747751	9747747	blind	3	13147712	0	0	0.242852
chr21	9751529	9751868	9751533	non_blind	5	13147723	0	0	0.242852
chr21	9751865	9751914	9751910	non_blind	3	13147724	0	0	0.242852
chr21	9752084	9752118	9752114	non_blind	3	13147738	0	0	0.242852
chr21	9752194	9752243	9752239	non_blind	3	13147746	0	0	0.242852
chr21	9752360	9752522	9752364	non_blind	5	13147751	0	0	0.242852
chr21	9754088	9754181	9754092	non_blind	5	13147757	0	0	5.0457e-14
chr21	9758379	9758427	9758423	non_blind	3	13147778	0	0	0.0220774
chr21	9758424	9759049	9758428	non_blind	5	13147779	0	0	0.0220774
chr21	9759086	9759464	9759460	non_blind	3	13147780	0	0	0.0220774
chr21	9759461	9759875	9759465	blind	5	13147781	0	0	0.0220774
chr21	9759461	9759875	9759871	blind	3	13147782	0	0	0.0220774
chr21	9759872	9759968	9759876	non_blind	5	13147783	0	0	0.0220774
chr21	9760705	9760972	9760968	non_blind	3	13147784	0	0	0.0220774
chr21	9760969	9761179	9760973	non_blind	5	13147785	0	0	0.596091
chr21	9761197	9761263	9761259	non_blind	3	13147786	0	0	0.596091
chr21	9761260	9761383	9761264	non_blind	5	13147787	0	0	0.596091
chr21	9761600	9761740	9761736	non_blind	3	13147788	1	0.463626	0.728555
chr21	9761839	9762428	9762424	non_blind	3	13147790	0	0	0.728555
chr21	9762425	9762697	9762429	blind	5	13147791	0	0	0.728555
chr21	9762425	9762697	9762693	blind	3	13147792	0	0	0.728555
chr21	9762694	9762821	9762698	blind	5	13147793	0	0	0.728555
chr21	9762694	9762821	9762817	blind	3	13147794	0	0	0.728555
chr21	9762818	9763148	9762822	non_blind	5	13147795	0	0	0.728555
chr21	9763606	9763671	9763667	non_blind	3	13147796	26	12.0543	0.728555
chr21	9763668	9763860	9763672	blind	5	13147797	0	0	0.728555
chr21	9763668	9763860	9763856	blind	3	13147798	0	0	0.728555
chr21	9763857	9763956	9763861	non_blind	5	13147799	6	2.78176	0.728555
chr21	9763957	9764008	9763961	non_blind	5	13147801	0	0	0.706478
chr21	9764005	9764029	9764025	non_blind	3	13147802	0	0	0.706478
chr21	9764026	9764064	9764030	blind	5	13147803	0	0	0.706478
chr21	9764026	9764064	9764060	blind	3	13147804	0	0	0.706478
chr21	9764250	9764284	9764280	non_blind	3	13147806	0	0	0.706478
chr21	9770926	9770983	9770930	non_blind	5	13147829	0	0	0.706478
chr21	9772211	9772371	9772215	non_blind	5	13147833	0	0	0.706478
chr21	9775724	9775840	9775836	non_blind	3	13147850	0	0	0.132465
chr21	9776252	9776424	9776420	non_blind	3	13147858	0	0	0.264929
chr21	9776421	9776528	9776524	blind	3	13147860	0	0	0.264929
chr21	9777170	9777410	9777174	non_blind	5	13147867	0	0	0.132465
chr21	9777554	9777597	9777558	blind	5	13147869	0	0	0.132465
chr21	9782497	9782572	9782501	non_blind	5	13147897	0	0	0.132465
chr21	9784229	9784307	9784303	non_blind	3	13147906	0	0	0.132465
chr21	9785321	9785485	9785481	non_blind	3	13147912	0	0	0.132465
chr21	9788219	9788366	9788362	non_blind	3	13147938	0	0	0.132465
chr21	9788363	9788430	9788426	blind	3	13147940	0	0	0.132465
chr21	9788518	9788555	9788551	non_blind	3	13147944	0	0	0.132465
chr21	9790316	9790351	9790347	non_blind	3	13147962	6	2.78176	0.132465
chr21	9792901	9793086	9793082	non_blind	3	13147982	0	0	0.132465
chr21	9796160	9796353	9796164	non_blind	5	13147999	0	0	0.132465
chr21	9810983	9811058	9811054	blind	3	13148076	0	0	0.132465
chr21	9812698	9812989	9812985	non_blind	3	13148084	0	0	0.132465
chr21	9813254	9813723	9813719	non_blind	3	13148088	0	0	0.132465
chr21	9820293	9820852	9820848	non_blind	3	13148128	0	0	0.132465
chr21	9836920	9837050	9836924	blind	5	13148215	0	0	0.132465
chr21	9836920	9837050	9837046	blind	3	13148216	0	0	0.132465
chr21	9838035	9838158	9838154	non_blind	3	13148224	0	0	0.132465
chr21	9838155	9838325	9838159	blind	5	13148225	0	0	0.132465
chr21	9838155	9838325	9838321	blind	3	13148226	0	0	5.04993e-14
chr21	9839150	9839225	9839154	blind	5	13148233	0	0	5.04993e-14
chr21	9839150	9839225	9839221	blind	3	13148234	0	0	5.04993e-14
chr21	9839222	9839461	9839226	non_blind	5	13148235	0	0	5.04993e-14
chr21	9839829	9839976	9839833	non_blind	5	13148239	0	0	5.04993e-14
chr21	9840391	9840494	9840395	non_blind	5	13148243	0	0	5.04993e-14
chr21	9840599	9840746	9840603	non_blind	5	13148245	0	0	5.04993e-14
chr21	9840850	9841009	9841005	blind	3	13148248	0	0	5.04993e-14
chr21	9844735	9844885	9844881	blind	3	13148270	0	0	5.04993e-14
chr21	9851604	9851769	9851608	non_blind	5	13148303	0	0	5.04993e-14
chr21	9860532	9861034	9861030	blind	3	13148362	0	0	5.04993e-14
chr21	9861044	9861169	9861165	non_blind	3	13148364	0	0	5.04993e-14
chr21	9862330	9862444	9862440	non_blind	3	13148366	0	0	5.04993e-14
chr21	9865165	9865374	9865169	blind	5	13148383	0	0	5.04993e-14
chr21	9869964	9870126	9869968	blind	5	13148399	0	0	5.04993e-14
chr21	9871121	9871208	9871125	non_blind	5	13148405	0	0	5.04993e-14
chr21	9874432	9874519	9874515	non_blind	3	13148416	0	0	5.04993e-14
chr21	9877816	9877914	9877910	blind	3	13148430	0	0	5.04993e-14
chr21	9887819	9887938	9887934	non_blind	3	13148484	0	0	5.04993e-14
chr21	9892364	9892516	9892368	non_blind	5	13148507	0	0	5.04993e-14
chr21	9893917	9893939	9893935	non_blind	3	13148516	0	0	5.04993e-14
chr21	9898034	9898078	9898074	non_blind	3	13148536	0	0	5.04993e-14
chr21	9914898	9915175	9914902	blind	5	13148591	0	0	5.04993e-14
chr21	9917303	9917482	9917307	blind	5	13148605	0	0	5.04993e-14
chr21	9923341	9923896	9923345	non_blind	5	13148627	0	0	5.04993e-14
chr21	9926371	9926396	9926375	blind	5	13148637	0	0	5.04993e-14
chr21	9926371	9926396	9926392	blind	3	13148638	0	0	5.04993e-14
chr21	9945840	9946342	9946338	blind	3	13148708	0	0	5.04993e-14
chr21	9946536	9946747	9946540	non_blind	5	13148711	0	0	0.0441549
chr21	9971890	9971931	9971894	blind	5	13148805	0	0	0.0441549
chr21	9971890	9971931	9971927	blind	3	13148806	0	0	0.0441549
chr21	9972948	9973301	9973297	non_blind	3	13148808	0	0	0.0441549
chr21	9973298	9973681	9973302	blind	5	13148809	0	0	0.0441549
chr21	9973298	9973681	9973677	blind	3	13148810	0	0	0.0441549
chr21	9974839	9975085	9975081	non_blind	3	13148816	0	0	0.0441549
chr21	9976254	9976444	9976440	non_blind	3	13148818	0	0	0.0441549
chr21	9978274	9978504	9978500	non_blind	3	13148832	0	0	0.0441549
chr21	9988829	9988941	9988937	blind	3	13148864	0	0	0.0441549
chr21	10005285	10005363	10005359	blind	3	13148932	2	0.927252	0.0441549
chr21	10014824	10014855	10014851	non_blind	3	13148964	0	0	0.0441549
chr21	10014852	10015019	10015015	blind	3	13148966	0	0	0.0441549
chr21	10024499	10024660	10024656	non_blind	3	13149004	0	0	0.0662323
chr21	10270164	10270253	10270168	non_blind	5	13149597	0	0	0.0662323
chr21	10270250	10270341	10270337	non_blind	3	13149598	0	0	0.17662
chr21	10272116	10272274	10272270	non_blind	3	13149606	0	0	0.17662
chr21	10272271	10272341	10272275	non_blind	5	13149607	0	0	0.17662
chr21	10328958	10329145	10328962	non_blind	5	13149637	0	0	0.17662
chr21	10329352	10329503	10329499	non_blind	3	13149638	0	0	0.17662
chr21	10329500	10329627	10329623	blind	3	13149640	0	0	0.17662
chr21	10331135	10331210	10331139	blind	5	13149655	0	0	0.132465
chr21	10332950	10333097	10332954	non_blind	5	13149665	0	0	0.132465
chr21	10336047	10336172	10336168	blind	3	13149696	1	0.463626	0.132465
chr21	10337182	10337277	10337273	blind	3	13149706	0	0	0.132465
chr21	10343450	10343663	10343659	blind	3	13149734	5	2.31813	0.132465
chr21	10359139	10359252	10359143	blind	5	13149831	0	0	0.132465
chr21	10360026	10360725	10360030	blind	5	13149835	0	0	0.132465
chr21	10361542	10361574	10361546	non_blind	5	13149839	0	0	0.132465
chr21	10384422	10384448	10384426	non_blind	5	13149987	0	0	0.132465
chr21	10385739	10385794	10385743	non_blind	5	13149993	0	0	0.132465
chr21	10386499	10386895	10386891	blind	3	13150002	0	0	0.132465
chr21	10387145	10387168	10387149	non_blind	5	13150007	0	0	0.132465
chr21	10400673	10401034	10400677	non_blind	5	13150097	0	0	0.154542
chr21	10402596	10402677	10402673	non_blind	3	13150108	0	0	0.132465
chr21	10403107	10403148	10403111	blind	5	13150115	0	0	0.132465
chr21	10405428	10405450	10405432	blind	5	13150135	0	0	0.0220774
chr21	10405428	10405450	10405446	blind	3	13150136	0	0	0.0220774
chr21	10405480	10405541	10405537	blind	3	13150142	0	0	0.0220774
chr21	10406569	10406615	10406611	non_blind	3	13150150	0	0	0.0220774
chr21	10410717	10410779	10410721	non_blind	5	13150167	0	0	0.0220774
chr21	10413839	10414269	10413843	non_blind	5	13150171	0	0	0.0220774
chr21	10417685	10417751	10417747	non_blind	3	13150188	0	0	0.0220774
chr21	10418518	10418967	10418522	non_blind	5	13150197	1	0.463626	0.0220774
chr21	10419240	10419367	10419244	non_blind	5	13150199	0	0	0.0220774
chr21	10420793	10420865	10420861	non_blind	3	13150206	0	0	0.0220774
chr21	10423203	10423389	10423207	non_blind	5	13150219	0	0	0.0662323
chr21	10423386	10423416	10423412	non_blind	3	13150220	0	0	0.0662323
chr21	10424554	10424599	10424558	blind	5	13150233	0	0	0.110387
chr21	10424554	10424599	10424595	blind	3	13150234	0	0	0.110387
chr21	10426144	10426452	10426148	blind	5	13150239	0	0	0.110387
chr21	10426449	10426482	10426453	blind	5	13150241	0	0	0.110387
chr21	10426449	10426482	10426478	blind	3	13150242	0	0	0.110387
chr21	10426479	10427049	10426483	non_blind	5	13150243	0	0	0.110387
chr21	10427511	10427573	10427569	non_blind	3	13150244	0	0	0.0883098
chr21	10429646	10429717	10429713	non_blind	3	13150250	0	0	0.0883098
chr21	10429714	10429742	10429718	non_blind	5	13150251	2	0.927252	0.0883098
chr21	10431251	10431389	10431385	blind	3	13150258	0	0	0.0883098
chr21	10437895	10438001	10437899	blind	5	13150289	2	0.927252	0.0883098
chr21	10438329	10438348	10438333	non_blind	5	13150297	0	0	0.0883098
chr21	10454428	10454530	10454432	non_blind	5	13150357	0	0	0.0883098
chr21	10456392	10456573	10456569	non_blind	3	13150364	0	0	0.0883098
chr21	10457603	10458082	10458078	non_blind	3	13150372	0	0	0.0883098
chr21	10458079	10458188	10458184	blind	3	13150374	0	0	0.220774
chr21	10458371	10458522	10458375	non_blind	5	13150379	0	0	0.220774
chr21	10458782	10458837	10458786	blind	5	13150381	0	0	0.220774
chr21	10458782	10458837	10458833	blind	3	13150382	0	0	0.220774
chr21	10458834	10459163	10458838	non_blind	5	13150383	0	0	0.17662
chr21	10459347	10459576	10459351	non_blind	5	13150385	0	0	0.220774
chr21	10460593	10460760	10460756	blind	3	13150390	0	0	0.17662
chr21	10463225	10463299	10463229	non_blind	5	13150401	0	0	0.17662
chr21	10464466	10464520	10464470	blind	5	13150411	0	0	0.17662
chr21	10464466	10464520	10464516	blind	3	13150412	0	0	0.17662
chr21	10464517	10464589	10464521	blind	5	13150413	6	2.78176	0.17662
chr21	10464680	10464797	10464684	non_blind	5	13150417	0	0	0.17662
chr21	10464794	10465354	10465350	non_blind	3	13150418	0	0	0.17662
chr21	10466744	10467194	10467190	blind	3	13150422	0	0	0.198697
chr21	10467191	10467232	10467195	non_blind	5	13150423	0	0	0.198697
chr21	10471904	10471961	10471908	non_blind	5	13150445	2	0.927252	0.441549
chr21	10481050	10481133	10481054	blind	5	13150489	0	0	0.441549
chr21	10483107	10483134	10483130	non_blind	3	13150492	0	0	0.441549
chr21	10511213	10511266	10511217	blind	5	13150655	0	0	0.441549
chr21	10511263	10511378	10511374	blind	3	13150658	0	0	0.441549
chr21	10512566	10512608	10512604	non_blind	3	13150668	0	0	0.441549
chr21	10528003	10528143	10528007	non_blind	5	13150731	0	0	0.309084
chr21	10530071	10530145	10530075	non_blind	5	13150737	0	0	0.309084
chr21	10536394	10536654	10536650	non_blind	3	13150752	1	0.463626	0.331162
chr21	10539415	10539450	10539446	non_blind	3	13150762	0	0	0.331162
chr21	10541116	10541190	10541120	non_blind	5	13150771	11	5.09989	0.353239
chr21	10545627	10545665	10545631	non_blind	5	13150781	0	0	0.309084
chr21	10546922	10547051	10546926	non_blind	5	13150789	0	0	0.309084
chr21	10551373	10551471	10551467	non_blind	3	13150798	0	0	0.309084
chr21	10552085	10552120	10552116	non_blind	3	13150802	0	0	0.309084
chr21	10562621	10562765	10562761	non_blind	3	13150844	0	0	0.309084
chr21	10564652	10564758	10564754	non_blind	3	13150856	0	0	0.309084
chr21	10569415	10569554	10569419	non_blind	5	13150877	0	0	0.441549
chr21	10570041	10570098	10570094	non_blind	3	13150882	1	0.463626	0.441549
chr21	10570285	10570408	10570404	non_blind	3	13150884	0	0	0.419471
chr21	10573273	10573436	10573432	blind	3	13150900	1	0.463626	0.419471
chr21	10574096	10574199	10574100	blind	5	13150905	0	0	0.17662
chr21	10578645	10578965	10578961	non_blind	3	13150942	0	0	0.17662
chr21	10579629	10579716	10579712	non_blind	3	13150948	0	0	0.17662
chr21	10581758	10581840	10581836	blind	3	13150954	0	0	0.17662
chr21	10583305	10583601	10583309	non_blind	5	13150961	0	0	0.17662
chr21	10591871	10591942	10591875	blind	5	13150995	0	0	0.17662
chr21	10598026	10598109	10598030	non_blind	5	13151015	6	2.78176	0.17662
chr21	10602204	10602273	10602269	non_blind	3	13151034	0	0	0.17662
chr21	10603056	10603089	10603085	non_blind	3	13151038	0	0	0.154542
chr21	10611988	10612036	10611992	non_blind	5	13151073	0	0	0.154542
chr21	10612043	10612084	10612047	non_blind	5	13151075	0	0	0.132465
chr21	10617045	10617712	10617708	non_blind	3	13151090	0	0	0.132465
chr21	10618930	10618983	10618979	blind	3	13151096	0	0	0.132465
chr21	10625660	10626048	10625664	non_blind	5	13151121	0	0	0.132465
chr21	10630134	10630173	10630138	non_blind	5	13151133	0	0	0.132465
chr21	10630708	10630981	10630712	non_blind	5	13151135	0	0	0.132465
chr21	10631849	10631893	10631889	non_blind	3	13151140	0	0	0.132465
chr21	10636028	10636070	10636066	blind	3	13151172	0	0	5.04993e-14
chr21	10638509	10638609	10638605	blind	3	13151192	0	0	5.04993e-14
chr21	10638606	10638981	10638610	non_blind	5	13151193	0	0	5.04993e-14
chr21	10638994	10639459	10639455	non_blind	3	13151194	0	0	5.04993e-14
chr21	10639456	10639481	10639460	non_blind	5	13151195	0	0	5.04993e-14
chr21	10641425	10641529	10641525	blind	3	13151208	0	0	5.04993e-14
chr21	10642003	10642096	10642007	non_blind	5	13151211	0	0	5.04993e-14
chr21	10645587	10646081	10645591	blind	5	13151229	0	0	5.04993e-14
chr21	10654651	10654729	10654725	non_blind	3	13151260	0	0	5.04993e-14
chr21	10654726	10654748	10654730	non_blind	5	13151261	0	0	5.04993e-14
chr21	10655646	10655762	10655758	non_blind	3	13151262	0	0	5.04993e-14
chr21	10655759	10656165	10655763	blind	5	13151263	0	0	5.04993e-14
chr21	10656162	10656292	10656166	non_blind	5	13151265	0	0	5.04993e-14
chr21	10659646	10659757	10659650	non_blind	5	13151267	0	0	5.04993e-14
chr21	10661841	10661996	10661992	non_blind	3	13151268	0	0	5.04993e-14
chr21	10666060	10666228	10666224	non_blind	3	13151270	0	0	5.04993e-14
chr21	10666225	10667627	10666229	blind	5	13151271	0	0	5.04993e-14
chr21	10666225	10667627	10667623	blind	3	13151272	0	0	5.04993e-14
chr21	10694523	10694804	10694527	non_blind	5	13151283	0	0	5.04993e-14
chr21	10700407	10701017	10700411	non_blind	5	13151287	0	0	5.04993e-14
chr21	10708671	10709773	10708675	non_blind	5	13151289	0	0	5.04993e-14
chr21	10725621	10726048	10725625	non_blind	5	13151295	0	0	5.04993e-14
chr21	10727430	10727647	10727434	non_blind	5	13151297	0	0	5.04993e-14
chr21	10729429	10729641	10729433	non_blind	5	13151299	0	0	5.04993e-14
chr21	10729638	10730411	10730407	non_blind	3	13151300	0	0	5.04993e-14
chr21	10730408	10730596	10730412	non_blind	5	13151301	0	0	5.04993e-14
chr21	10733153	10733509	10733505	non_blind	3	13151304	0	0	5.04993e-14
chr21	10733506	10733847	10733510	non_blind	5	13151305	0	0	5.04993e-14
chr21	10738196	10738229	10738225	non_blind	3	13151306	0	0	5.04993e-14
chr21	10745635	10747089	10747085	non_blind	3	13151342	0	0	5.04993e-14
chr21	10752599	10752972	10752603	non_blind	5	13151355	0	0	5.04993e-14
chr21	10753115	10753463	10753119	non_blind	5	13151357	0	0	5.04993e-14
chr21	10754002	10754723	10754719	non_blind	3	13151360	0	0	5.04993e-14
chr21	10762201	10762710	10762706	non_blind	3	13151372	0	0	5.04993e-14
chr21	10763181	10763925	10763921	non_blind	3	13151374	0	0	5.04993e-14
chr21	10766482	10767616	10766486	non_blind	5	13151377	0	0	5.04993e-14
chr21	10781971	10782475	10782471	non_blind	3	13151416	0	0	5.04993e-14
chr21	10787700	10787897	10787893	non_blind	3	13151430	0	0	5.04993e-14
chr21	10790170	10791180	10791176	blind	3	13151434	0	0	5.04993e-14
chr21	10795476	10795650	10795480	blind	5	13151445	0	0	5.04993e-14
chr21	10795687	10796455	10796451	non_blind	3	13151448	0	0	5.04993e-14
chr21	10798336	10799023	10799019	blind	3	13151460	0	0	5.04993e-14
chr21	10808709	10809143	10809139	non_blind	3	13151480	0	0	5.04993e-14
chr21	10869351	10869596	10869592	non_blind	3	13151496	0	0	5.04993e-14
chr21	10888962	10889358	10888966	non_blind	5	13151547	0	0	5.04993e-14
chr21	11041435	11041583	11041439	non_blind	5	13151687	0	0	5.04993e-14
chr21	11122396	11122515	11122511	non_blind	3	13151752	0	0	5.04993e-14
chr21	11240689	11240901	11240897	non_blind	3	13151938	0	0	5.04993e-14
chr21	11522772	11523214	11523210	non_blind	3	13152386	0	0	5.04993e-14
chr21	11529255	11529691	11529687	non_blind	3	13152398	0	0	5.04993e-14
chr21	11529688	11530030	11529692	blind	5	13152399	0	0	5.04993e-14
chr21	11543664	11544260	11543668	non_blind	5	13152419	0	0	5.04993e-14
chr21	11564134	11564729	11564138	non_blind	5	13152453	0	0	5.04993e-14
chr21	11567446	11568223	11568219	non_blind	3	13152458	0	0	5.04993e-14
chr21	11973958	11974553	11973962	non_blind	5	13153109	0	0	5.04993e-14
chr21	12012749	12013523	12013519	non_blind	3	13153166	0	0	5.04993e-14
chr21	12025804	12026400	12025808	non_blind	5	13153187	0	0	5.04993e-14
chr21	12915010	12915075	12915071	non_blind	3	13154414	0	0	5.04993e-14
chr21	12966713	12967058	12966717	non_blind	5	13154419	0	0	5.04993e-14
chr21	12967335	12968265	12967339	non_blind	5	13154423	0	0	5.04993e-14
chr21	12969264	12969438	12969268	blind	5	13154425	0	0	5.04993e-14
chr21	12981946	12983316	12983312	blind	3	13154450	0	0	5.04993e-14
chr21	12991029	12991860	12991033	non_blind	5	13154457	0	0	5.04993e-14
chr21	13003068	13003178	13003072	non_blind	5	13154491	0	0	5.04993e-14
chr21	13018024	13018117	13018028	non_blind	5	13154575	0	0	5.04993e-14
chr21	13020986	13021247	13020990	non_blind	5	13154593	0	0	5.04993e-14
chr21	13035735	13035885	13035739	non_blind	5	13154665	0	0	5.04993e-14
chr21	13075563	13075603	13075567	non_blind	5	13154873	0	0	5.04993e-14
chr21	13080248	13080306	13080302	blind	3	13154894	0	0	5.04993e-14
chr21	13106254	13106303	13106258	non_blind	5	13154977	0	0	5.04993e-14
chr21	13109507	13110048	13110044	non_blind	3	13154984	0	0	5.04993e-14
chr21	13110264	13110473	13110469	blind	3	13154988	0	0	5.04993e-14
chr21	13187910	13188070	13187914	non_blind	5	13155313	0	0	5.04993e-14
chr21	13225959	13226185	13226181	non_blind	3	13155490	0	0	5.04993e-14
chr21	13228929	13229323	13229319	non_blind	3	13155500	0	0	5.04993e-14
chr21	13240640	13240885	13240881	non_blind	3	13155550	0	0	5.04993e-14
chr21	13241315	13241351	13241319	blind	5	13155555	0	0	5.04993e-14
chr21	13241348	13241540	13241352	non_blind	5	13155557	0	0	5.04993e-14
chr21	13255387	13255471	13255391	blind	5	13155619	0	0	5.04993e-14
chr21	13256600	13257411	13256604	blind	5	13155625	0	0	5.04993e-14
chr21	13259226	13259252	13259230	non_blind	5	13155643	0	0	5.04993e-14
chr21	13262934	13263091	13262938	non_blind	5	13155667	0	0	5.04993e-14
chr21	13266562	13266617	13266613	blind	3	13155684	0	0	5.04993e-14
chr21	13280593	13280640	13280636	non_blind	3	13155738	0	0	5.04993e-14
chr21	13280637	13280744	13280641	non_blind	5	13155739	0	0	5.04993e-14
chr21	13282252	13282335	13282331	non_blind	3	13155744	0	0	5.04993e-14
chr21	13284422	13284509	13284426	non_blind	5	13155751	0	0	5.04993e-14
chr21	13284620	13284683	13284679	blind	3	13155754	0	0	5.04993e-14
chr21	13296880	13297049	13296884	blind	5	13155797	0	0	5.04993e-14
chr21	13297589	13297664	13297593	non_blind	5	13155801	0	0	5.04993e-14
chr21	13299745	13299949	13299945	non_blind	3	13155808	0	0	5.04993e-14
chr21	13302671	13302743	13302675	blind	5	13155813	0	0	5.04993e-14
chr21	13313015	13313282	13313278	non_blind	3	13155854	0	0	5.04993e-14
chr21	13314520	13314585	13314581	non_blind	3	13155864	0	0	5.04993e-14
chr21	13316454	13316531	13316527	non_blind	3	13155878	0	0	5.04993e-14
chr21	13316528	13316637	13316633	blind	3	13155880	0	0	5.04993e-14
chr21	13319808	13319838	13319834	non_blind	3	13155904	0	0	5.04993e-14
chr21	13331966	13332062	13331970	non_blind	5	13155975	0	0	5.04993e-14
chr21	13333959	13334003	13333999	non_blind	3	13155982	0	0	5.04993e-14
chr21	13334328	13334456	13334332	non_blind	5	13155985	0	0	5.04993e-14
chr21	13341836	13342062	13341840	non_blind	5	13156007	0	0	5.04993e-14
chr21	13354279	13354380	13354283	non_blind	5	13156061	0	0	5.04993e-14
chr21	13363048	13363240	13363236	non_blind	3	13156094	0	0	5.04993e-14
chr21	13376807	13377021	13376811	blind	5	13156127	0	0	5.04993e-14
chr21	13381667	13382093	13381671	blind	5	13156137	0	0	5.04993e-14
chr21	13403415	13403459	13403455	non_blind	3	13156220	0	0	5.04993e-14
chr21	13405111	13405372	13405368	non_blind	3	13156230	0	0	5.04993e-14
chr21	13407055	13407207	13407059	blind	5	13156247	0	0	5.04993e-14
chr21	13407808	13407869	13407812	non_blind	5	13156251	0	0	5.04993e-14
chr21	13407955	13407981	13407959	blind	5	13156253	0	0	5.04993e-14
chr21	13407955	13407981	13407977	blind	3	13156254	0	0	5.04993e-14
chr21	13407978	13408441	13407982	non_blind	5	13156255	0	0	5.04993e-14
chr21	13411434	13411555	13411438	non_blind	5	13156277	0	0	5.04993e-14
chr21	13414129	13414468	13414464	non_blind	3	13156284	0	0	5.04993e-14
chr21	13420103	13420177	13420107	non_blind	5	13156319	0	0	5.04993e-14
chr21	13422105	13422140	13422109	non_blind	5	13156329	0	0	5.04993e-14
chr21	13424079	13424186	13424182	non_blind	3	13156334	0	0	5.04993e-14
chr21	13424299	13424466	13424303	non_blind	5	13156339	0	0	5.04993e-14
chr21	13428113	13428379	13428375	non_blind	3	13156350	0	0	5.04993e-14
chr21	13430676	13430945	13430680	non_blind	5	13156361	0	0	5.04993e-14
chr21	13431188	13431242	13431238	non_blind	3	13156364	0	0	5.04993e-14
chr21	13432508	13432558	13432554	non_blind	3	13156374	0	0	5.04993e-14
chr21	13435212	13435304	13435300	non_blind	3	13156402	0	0	5.04993e-14
chr21	13448072	13448302	13448076	non_blind	5	13156455	0	0	5.04993e-14
chr21	13451061	13451125	13451121	non_blind	3	13156472	0	0	5.04993e-14
chr21	13452413	13452740	13452736	blind	3	13156488	0	0	5.04993e-14
chr21	13452737	13452995	13452741	blind	5	13156489	0	0	5.04993e-14
chr21	13452992	13453088	13452996	non_blind	5	13156491	0	0	5.04993e-14
chr21	13455933	13456328	13455937	non_blind	5	13156513	0	0	5.04993e-14
chr21	13462923	13463372	13462927	non_blind	5	13156555	0	0	5.04993e-14
chr21	13463731	13463881	13463735	non_blind	5	13156561	0	0	5.04993e-14
chr21	13464389	13464995	13464991	blind	3	13156564	0	0	5.04993e-14
chr21	13474614	13474698	13474618	non_blind	5	13156617	0	0	5.04993e-14
chr21	13476265	13476447	13476443	non_blind	3	13156624	0	0	5.04993e-14
chr21	13479249	13479719	13479715	non_blind	3	13156634	0	0	5.04993e-14
chr21	13491168	13491307	13491303	non_blind	3	13156708	0	0	5.04993e-14
chr21	13493881	13494011	13493885	blind	5	13156717	0	0	5.04993e-14
chr21	13499784	13499837	13499788	non_blind	5	13156739	0	0	5.04993e-14
chr21	13501730	13501955	13501951	blind	3	13156756	0	0	5.04993e-14
chr21	13508434	13508697	13508438	blind	5	13156787	0	0	5.04993e-14
chr21	13515875	13515901	13515879	non_blind	5	13156819	0	0	5.04993e-14
chr21	13527085	13527262	13527089	non_blind	5	13156869	0	0	5.04993e-14
chr21	13527884	13527963	13527959	non_blind	3	13156876	0	0	5.04993e-14
chr21	13548272	13548502	13548498	non_blind	3	13156958	0	0	5.04993e-14
chr21	13549774	13550112	13549778	non_blind	5	13156965	0	0	5.04993e-14
chr21	13555409	13555558	13555413	non_blind	5	13156987	0	0	5.04993e-14
chr21	13562216	13562523	13562220	non_blind	5	13157013	0	0	5.04993e-14
chr21	13570347	13570407	13570351	non_blind	5	13157047	0	0	5.04993e-14
chr21	13571984	13572044	13572040	blind	3	13157052	0	0	5.04993e-14
chr21	13572041	13572165	13572045	blind	5	13157053	0	0	5.04993e-14
chr21	13573645	13573765	13573649	non_blind	5	13157069	0	0	5.04993e-14
chr21	13577333	13577432	13577428	blind	3	13157082	0	0	5.04993e-14
chr21	13606075	13606141	13606079	blind	5	13157207	0	0	5.04993e-14
chr21	13643399	13643423	13643419	non_blind	3	13157368	0	0	5.04993e-14
chr21	13735777	13735841	13735781	non_blind	5	13157767	0	0	5.04993e-14
chr21	13799384	13799516	13799512	non_blind	3	13158060	0	0	5.04993e-14
chr21	13802089	13802260	13802256	non_blind	3	13158078	0	0	5.04993e-14
chr21	13806638	13807033	13807029	non_blind	3	13158110	0	0	5.04993e-14
chr21	13807093	13807334	13807330	blind	3	13158114	0	0	5.04993e-14
chr21	13809477	13809772	13809768	non_blind	3	13158142	0	0	5.04993e-14
chr21	13810002	13810075	13810006	non_blind	5	13158145	0	0	5.04993e-14
chr21	13810898	13811026	13810902	blind	5	13158153	0	0	5.04993e-14
chr21	13814904	13815027	13815023	non_blind	3	13158170	0	0	5.04993e-14
chr21	13823894	13824438	13824434	non_blind	3	13158222	0	0	5.04993e-14
chr21	13824435	13824617	13824439	non_blind	5	13158223	0	0	5.04993e-14
chr21	13825163	13825271	13825267	non_blind	3	13158228	0	0	5.04993e-14
chr21	13825302	13825555	13825306	non_blind	5	13158231	0	0	5.04993e-14
chr21	13827652	13827762	13827758	non_blind	3	13158238	0	0	5.04993e-14
chr21	13827835	13827931	13827839	non_blind	5	13158241	0	0	5.04993e-14
chr21	13834499	13834546	13834503	blind	5	13158269	0	0	5.04993e-14
chr21	13846567	13846743	13846571	non_blind	5	13158325	0	0	0.154542
chr21	13848065	13848116	13848069	non_blind	5	13158335	0	0	0.154542
chr21	13848741	13848805	13848745	non_blind	5	13158339	0	0	0.198697
chr21	13849084	13849317	13849313	blind	3	13158342	0	0	0.198697
chr21	13850429	13850571	13850567	non_blind	3	13158348	0	0	0.198697
chr21	13851664	13851945	13851668	non_blind	5	13158365	0	0	0.198697
chr21	13854814	13855033	13854818	non_blind	5	13158371	0	0	0.198697
chr21	13860579	13860726	13860583	blind	5	13158387	0	0	0.198697
chr21	13861576	13861897	13861580	non_blind	5	13158403	0	0	0.198697
chr21	13862560	13862874	13862870	non_blind	3	13158404	0	0	0.198697
chr21	13867019	13867107	13867103	blind	3	13158422	7	3.24538	0.198697
chr21	13870355	13870491	13870487	blind	3	13158446	0	0	0.198697
chr21	13878163	13878247	13878243	non_blind	3	13158470	2	0.927252	0.198697
chr21	13880071	13880160	13880156	non_blind	3	13158474	0	0	0.198697
chr21	13883370	13883474	13883470	non_blind	3	13158496	0	0	0.198697
chr21	13883471	13883576	13883475	non_blind	5	13158497	0	0	0.198697
chr21	13883815	13884040	13883819	non_blind	5	13158499	0	0	0.198697
chr21	13884335	13884660	13884339	non_blind	5	13158501	0	0	0.198697
chr21	13888487	13888517	13888513	non_blind	3	13158528	0	0	0.198697
chr21	13894563	13894627	13894623	non_blind	3	13158548	0	0	0.198697
chr21	13905365	13905540	13905369	non_blind	5	13158595	0	0	0.198697
chr21	13913351	13913549	13913545	non_blind	3	13158610	0	0	0.0441549
chr21	13919498	13919551	13919547	blind	3	13158640	0	0	0.0441549
chr21	13919548	13919727	13919552	blind	5	13158641	0	0	5.04993e-14
chr21	13920044	13920344	13920048	blind	5	13158647	0	0	5.04993e-14
chr21	13925405	13925605	13925601	blind	3	13158672	0	0	5.04993e-14
chr21	13927357	13927874	13927870	non_blind	3	13158684	0	0	5.04993e-14
chr21	13979902	13980053	13980049	non_blind	3	13158906	0	0	5.04993e-14
chr21	13981874	13981997	13981878	non_blind	5	13158915	0	0	5.04993e-14
chr21	13985335	13985502	13985498	non_blind	3	13158928	0	0	5.04993e-14
chr21	13985580	13985613	13985584	non_blind	5	13158931	0	0	5.04993e-14
chr21	14000414	14000519	14000418	blind	5	13159007	0	0	5.04993e-14
chr21	14003591	14003675	14003671	blind	3	13159028	0	0	5.04993e-14
chr21	14003998	14004024	14004002	non_blind	5	13159035	0	0	5.04993e-14
chr21	14004521	14005153	14004525	non_blind	5	13159037	0	0	5.04993e-14
chr21	14007514	14007558	14007518	non_blind	5	13159045	0	0	5.04993e-14
chr21	14008232	14008461	14008236	blind	5	13159047	0	0	5.04993e-14
chr21	14019372	14019431	14019427	non_blind	3	13159094	0	0	5.04993e-14
chr21	14020066	14020176	14020172	blind	3	13159100	0	0	5.04993e-14
chr21	14024783	14025352	14025348	non_blind	3	13159122	0	0	5.04993e-14
chr21	14025349	14025478	14025353	non_blind	5	13159123	0	0	5.04993e-14
chr21	14025840	14026207	14026203	non_blind	3	13159124	0	0	5.04993e-14
chr21	14026214	14026349	14026345	non_blind	3	13159126	0	0	5.04993e-14
chr21	14026346	14026480	14026350	blind	5	13159127	0	0	5.04993e-14
chr21	14026935	14026968	14026964	non_blind	3	13159132	0	0	5.04993e-14
chr21	14032896	14032976	14032900	blind	5	13159161	0	0	5.04993e-14
chr21	14034937	14035032	14035028	non_blind	3	13159176	0	0	5.04993e-14
chr21	14035029	14035135	14035033	blind	5	13159177	0	0	5.04993e-14
chr21	14035029	14035135	14035131	blind	3	13159178	0	0	5.04993e-14
chr21	14035132	14035191	14035136	blind	5	13159179	0	0	5.04993e-14
chr21	14035132	14035191	14035187	blind	3	13159180	0	0	5.04993e-14
chr21	14035188	14035323	14035192	non_blind	5	13159181	0	0	5.04993e-14
chr21	14035877	14036231	14036227	non_blind	3	13159182	0	0	5.04993e-14
chr21	14036572	14036921	14036917	non_blind	3	13159184	0	0	5.04993e-14
chr21	14036918	14036975	14036922	non_blind	5	13159185	0	0	5.04993e-14
chr21	14037615	14038087	14038083	non_blind	3	13159186	0	0	5.04993e-14
chr21	14039636	14039804	14039800	non_blind	3	13159188	0	0	5.04993e-14
chr21	14039801	14039873	14039805	non_blind	5	13159189	0	0	5.04993e-14
chr21	14040146	14040297	14040150	non_blind	5	13159191	0	0	5.04993e-14
chr21	14041782	14041841	14041786	blind	5	13159193	0	0	5.04993e-14
chr21	14042145	14042206	14042202	non_blind	3	13159196	0	0	5.04993e-14
chr21	14042203	14042301	14042207	blind	5	13159197	0	0	5.04993e-14
chr21	14042203	14042301	14042297	blind	3	13159198	0	0	5.04993e-14
chr21	14042321	14042709	14042705	non_blind	3	13159200	0	0	5.04993e-14
chr21	14043044	14043185	14043048	blind	5	13159203	0	0	0.0883098
chr21	14043182	14043711	14043186	non_blind	5	13159205	0	0	0.0883098
chr21	14045076	14045827	14045080	non_blind	5	13159211	0	0	0.0883098
chr21	14045893	14046070	14046066	non_blind	3	13159212	0	0	0.0883098
chr21	14046067	14046109	14046071	non_blind	5	13159213	0	0	0.0883098
chr21	14046106	14046855	14046851	non_blind	3	13159214	0	0	0.0883098
chr21	14046852	14046975	14046971	blind	3	13159216	0	0	0.0883098
chr21	14047073	14047403	14047399	non_blind	3	13159218	0	0	0.0883098
chr21	14048298	14048423	14048302	blind	5	13159223	0	0	0.0883098
chr21	14048298	14048423	14048419	blind	3	13159224	0	0	0.0883098
chr21	14048420	14048444	14048424	non_blind	5	13159225	4	1.8545	0.0883098
chr21	14049087	14049171	14049167	non_blind	3	13159226	0	0	0.0883098
chr21	14049304	14049338	14049334	non_blind	3	13159228	0	0	0.0883098
chr21	14049335	14049708	14049339	blind	5	13159229	0	0	0.0883098
chr21	14050034	14050374	14050370	non_blind	3	13159232	0	0	0.0883098
chr21	14050371	14050518	14050375	blind	5	13159233	0	0	0.0883098
chr21	14050371	14050518	14050514	blind	3	13159234	0	0	0.0883098
chr21	14050515	14050679	14050519	blind	5	13159235	0	0	0.0883098
chr21	14050515	14050679	14050675	blind	3	13159236	0	0	0.0883098
chr21	14050873	14050938	14050877	non_blind	5	13159239	0	0	0.0883098
chr21	14051302	14051606	14051306	non_blind	5	13159243	0	0	0.0883098
chr21	14051673	14051715	14051711	non_blind	3	13159244	0	0	5.04993e-14
chr21	14051712	14051853	14051716	blind	5	13159245	0	0	5.04993e-14
chr21	14051850	14051954	14051950	blind	3	13159248	0	0	5.04993e-14
chr21	14052984	14053020	14052988	non_blind	5	13159253	0	0	5.04993e-14
chr21	14053143	14053180	14053147	non_blind	5	13159255	0	0	5.04993e-14
chr21	14053628	14054056	14054052	non_blind	3	13159262	0	0	5.04993e-14
chr21	14055627	14055713	14055709	non_blind	3	13159266	0	0	5.04993e-14
chr21	14055710	14055778	14055714	non_blind	5	13159267	0	0	5.04993e-14
chr21	14056721	14056859	14056855	non_blind	3	13159270	0	0	5.04993e-14
chr21	14062251	14062375	14062371	non_blind	3	13159284	0	0	0.0220774
chr21	14064144	14064161	14064148	blind	5	13159295	0	0	0.0220774
chr21	14064144	14064161	14064157	blind	3	13159296	0	0	0.0220774
chr21	14064432	14064769	14064436	non_blind	5	13159303	0	0	0.0220774
chr21	14066218	14066472	14066222	non_blind	5	13159307	0	0	0.0220774
chr21	14070179	14070249	14070183	non_blind	5	13159319	0	0	0.0220774
chr21	14070649	14070778	14070774	non_blind	3	13159320	0	0	0.0220774
chr21	14070775	14071826	14070779	non_blind	5	13159321	0	0	0.0220774
chr21	14072819	14073196	14072823	non_blind	5	13159323	0	0	0.0220774
chr21	14075056	14075124	14075120	non_blind	3	13159324	0	0	0.0220774
chr21	14075438	14075505	14075501	non_blind	3	13159326	1	0.463626	0.0220774
chr21	14075505	14075567	14075563	non_blind	3	13159328	0	0	0.0220774
chr21	14075564	14075721	14075568	non_blind	5	13159329	0	0	0.0220774
chr21	14076300	14076671	14076304	non_blind	5	13159333	0	0	0.0220774
chr21	14076688	14076857	14076853	non_blind	3	13159334	0	0	0.0220774
chr21	14077482	14078746	14078742	non_blind	3	13159336	0	0	0.0220774
chr21	14078743	14078976	14078747	non_blind	5	13159337	0	0	0.0220774
chr21	14079861	14079905	14079865	blind	5	13159341	0	0	0.0220774
chr21	14079960	14080343	14080339	non_blind	3	13159344	0	0	0.0220774
chr21	14080340	14080389	14080344	non_blind	5	13159345	0	0	0.0220774
chr21	14082045	14082130	14082126	blind	3	13159354	0	0	0.0220774
chr21	14082127	14082245	14082131	non_blind	5	13159355	0	0	5.04993e-14
chr21	14082242	14082359	14082355	non_blind	3	13159356	0	0	5.04993e-14
chr21	14082356	14082495	14082360	blind	5	13159357	0	0	5.04993e-14
chr21	14082356	14082495	14082491	blind	3	13159358	0	0	5.04993e-14
chr21	14082492	14082737	14082496	non_blind	5	13159359	0	0	5.04993e-14
chr21	14082805	14082928	14082924	non_blind	3	13159360	0	0	5.04993e-14
chr21	14083618	14083741	14083737	non_blind	3	13159364	0	0	5.04993e-14
chr21	14083738	14083802	14083742	blind	5	13159365	0	0	5.04993e-14
chr21	14083799	14083872	14083803	non_blind	5	13159367	0	0	5.04993e-14
chr21	14083916	14084041	14084037	non_blind	3	13159370	0	0	5.04993e-14
chr21	14084038	14084174	14084042	non_blind	5	13159371	0	0	5.04993e-14
chr21	14084590	14084682	14084678	non_blind	3	13159372	0	0	5.04993e-14
chr21	14086414	14086500	14086496	blind	3	13159388	0	0	0.0662323
chr21	14087236	14087350	14087346	blind	3	13159394	0	0	0.0662323
chr21	14087592	14087622	14087618	non_blind	3	13159400	0	0	0.0662323
chr21	14087619	14087842	14087623	blind	5	13159401	0	0	0.0662323
chr21	14089303	14089401	14089397	blind	3	13159412	0	0	0.0662323
chr21	14089398	14089578	14089402	blind	5	13159413	0	0	0.0662323
chr21	14089575	14089690	14089579	non_blind	5	13159415	0	0	0.0662323
chr21	14090141	14090208	14090204	non_blind	3	13159416	0	0	0.0662323
chr21	14091206	14091248	14091244	blind	3	13159422	0	0	0.0662323
chr21	14091245	14091317	14091313	blind	3	13159424	0	0	0.0662323
chr21	14091428	14091510	14091432	blind	5	13159427	3	1.39088	0.0662323
chr21	14091428	14091510	14091506	blind	3	13159428	0	0	0.0662323
chr21	14091726	14091766	14091762	non_blind	3	13159430	0	0	0.0662323
chr21	14091799	14092218	14091803	non_blind	5	13159433	0	0	0.0662323
chr21	14095645	14095822	14095818	non_blind	3	13159446	0	0	0.0662323
chr21	14095844	14095871	14095848	non_blind	5	13159449	0	0	0.0662323
chr21	14095967	14096196	14096192	non_blind	3	13159450	0	0	0.0662323
chr21	14096193	14096522	14096197	non_blind	5	13159451	0	0	0.0662323
chr21	14096519	14096627	14096623	non_blind	3	13159452	0	0	0.0662323
chr21	14096664	14096728	14096724	blind	3	13159456	0	0	0.0662323
chr21	14096747	14096951	14096947	non_blind	3	13159458	0	0	0.0662323
chr21	14096948	14097040	14096952	non_blind	5	13159459	0	0	5.04993e-14
chr21	14097562	14097603	14097599	non_blind	3	13159466	0	0	5.04993e-14
chr21	14098907	14099141	14099137	non_blind	3	13159472	0	0	5.04993e-14
chr21	14099873	14099922	14099877	non_blind	5	13159475	0	0	5.04993e-14
chr21	14100041	14100109	14100045	non_blind	5	13159477	0	0	5.04993e-14
chr21	14100374	14100458	14100454	non_blind	3	13159486	0	0	5.04993e-14
chr21	14101670	14101826	14101674	blind	5	13159495	0	0	5.04993e-14
chr21	14101823	14101842	14101827	blind	5	13159497	0	0	5.04993e-14
chr21	14101823	14101842	14101838	blind	3	13159498	0	0	5.04993e-14
chr21	14101839	14101978	14101843	non_blind	5	13159499	0	0	5.04993e-14
chr21	14102708	14103542	14102712	non_blind	5	13159501	0	0	5.04993e-14
chr21	14104098	14104225	14104221	blind	3	13159508	0	0	5.04993e-14
chr21	14105321	14105406	14105325	non_blind	5	13159513	0	0	5.04993e-14
chr21	14107732	14108046	14108042	non_blind	3	13159522	0	0	5.04993e-14
chr21	14108043	14108434	14108047	blind	5	13159523	0	0	5.04993e-14
chr21	14108043	14108434	14108430	blind	3	13159524	0	0	5.04993e-14
chr21	14108431	14109015	14108435	non_blind	5	13159525	0	0	5.04993e-14
chr21	14109171	14109228	14109224	non_blind	3	13159526	0	0	5.04993e-14
chr21	14109225	14109419	14109229	non_blind	5	13159527	0	0	5.04993e-14
chr21	14109886	14110114	14110110	non_blind	3	13159528	0	0	5.04993e-14
chr21	14110111	14110398	14110115	non_blind	5	13159529	0	0	5.04993e-14
chr21	14110786	14110851	14110847	non_blind	3	13159532	0	0	5.04993e-14
chr21	14112414	14112473	14112418	non_blind	5	13159537	0	0	5.04993e-14
chr21	14112948	14113192	14113188	non_blind	3	13159538	0	0	5.04993e-14
chr21	14113189	14113341	14113193	blind	5	13159539	0	0	5.04993e-14
chr21	14113189	14113341	14113337	blind	3	13159540	0	0	5.04993e-14
chr21	14113338	14113364	14113342	non_blind	5	13159541	0	0	5.04993e-14
chr21	14113361	14113566	14113562	non_blind	3	13159542	0	0	5.04993e-14
chr21	14113563	14113788	14113567	non_blind	5	13159543	0	0	5.04993e-14
chr21	14113818	14113903	14113899	non_blind	3	13159544	0	0	5.04993e-14
chr21	14115023	14115329	14115325	non_blind	3	13159552	0	0	5.04993e-14
chr21	14115502	14115818	14115506	blind	5	13159557	0	0	5.04993e-14
chr21	14115815	14116149	14115819	non_blind	5	13159559	0	0	5.04993e-14
chr21	14116263	14116706	14116267	blind	5	13159561	0	0	5.04993e-14
chr21	14116263	14116706	14116702	blind	3	13159562	0	0	5.04993e-14
chr21	14117119	14117155	14117151	non_blind	3	13159564	0	0	5.04993e-14
chr21	14117429	14117481	14117477	non_blind	3	13159566	0	0	5.04993e-14
chr21	14117478	14117708	14117482	non_blind	5	13159567	0	0	5.04993e-14
chr21	14118029	14118165	14118033	blind	5	13159571	0	0	5.04993e-14
chr21	14118029	14118165	14118161	blind	3	13159572	0	0	5.04993e-14
chr21	14118173	14118225	14118177	blind	5	13159575	0	0	5.04993e-14
chr21	14118173	14118225	14118221	blind	3	13159576	0	0	5.04993e-14
chr21	14118222	14118525	14118226	blind	5	13159577	0	0	5.04993e-14
chr21	14118222	14118525	14118521	blind	3	13159578	0	0	5.04993e-14
chr21	14118522	14118625	14118526	non_blind	5	13159579	0	0	5.04993e-14
chr21	14118622	14118801	14118797	non_blind	3	13159580	0	0	5.04993e-14
chr21	14118798	14118899	14118802	non_blind	5	13159581	0	0	5.04993e-14
chr21	14119243	14119379	14119375	non_blind	3	13159582	0	0	5.04993e-14
chr21	14119376	14119431	14119380	non_blind	5	13159583	0	0	5.04993e-14
chr21	14119428	14119538	14119534	non_blind	3	13159584	0	0	5.04993e-14
chr21	14119535	14119688	14119539	non_blind	5	13159585	0	0	5.04993e-14
chr21	14120989	14121079	14121075	non_blind	3	13159588	0	0	5.04993e-14
chr21	14121076	14121111	14121080	non_blind	5	13159589	0	0	5.04993e-14
chr21	14121108	14121229	14121225	non_blind	3	13159590	0	0	5.04993e-14
chr21	14121226	14121356	14121230	blind	5	13159591	0	0	5.04993e-14
chr21	14121682	14121730	14121726	non_blind	3	13159594	0	0	5.04993e-14
chr21	14121727	14121789	14121731	blind	5	13159595	0	0	5.04993e-14
chr21	14121727	14121789	14121785	blind	3	13159596	0	0	5.04993e-14
chr21	14121809	14121959	14121813	non_blind	5	13159601	0	0	5.04993e-14
chr21	14122053	14122122	14122118	non_blind	3	13159602	0	0	5.04993e-14
chr21	14122119	14122270	14122123	non_blind	5	13159603	0	0	5.04993e-14
chr21	14122311	14122338	14122334	non_blind	3	13159604	0	0	5.04993e-14
chr21	14122335	14122588	14122339	blind	5	13159605	0	0	5.04993e-14
chr21	14122335	14122588	14122584	blind	3	13159606	0	0	5.04993e-14
chr21	14122585	14122646	14122589	non_blind	5	13159607	0	0	5.04993e-14
chr21	14122725	14122808	14122804	non_blind	3	13159608	0	0	5.04993e-14
chr21	14122805	14122908	14122809	blind	5	13159609	0	0	5.04993e-14
chr21	14123187	14123239	14123235	non_blind	3	13159614	0	0	5.04993e-14
chr21	14123236	14123406	14123240	blind	5	13159615	0	0	5.04993e-14
chr21	14123236	14123406	14123402	blind	3	13159616	0	0	5.04993e-14
chr21	14123403	14123704	14123407	blind	5	13159617	0	0	5.04993e-14
chr21	14123403	14123704	14123700	blind	3	13159618	0	0	5.04993e-14
chr21	14123729	14123772	14123768	non_blind	3	13159620	0	0	5.04993e-14
chr21	14123769	14123803	14123773	blind	5	13159621	0	0	5.04993e-14
chr21	14123769	14123803	14123799	blind	3	13159622	0	0	5.04993e-14
chr21	14123800	14123986	14123804	non_blind	5	13159623	0	0	5.04993e-14
chr21	14124044	14124219	14124215	non_blind	3	13159624	0	0	5.04993e-14
chr21	14124216	14124328	14124220	non_blind	5	13159625	0	0	5.04993e-14
chr21	14124619	14124744	14124623	blind	5	13159627	0	0	5.04993e-14
chr21	14125793	14125937	14125933	blind	3	13159636	0	0	5.04993e-14
chr21	14125934	14125962	14125938	non_blind	5	13159637	0	0	5.04993e-14
chr21	14126512	14126562	14126516	non_blind	5	13159639	0	0	5.04993e-14
chr21	14127180	14127289	14127285	non_blind	3	13159640	0	0	5.04993e-14
chr21	14127286	14127357	14127290	blind	5	13159641	0	0	5.04993e-14
chr21	14127286	14127357	14127353	blind	3	13159642	0	0	5.04993e-14
chr21	14127601	14127939	14127935	non_blind	3	13159644	0	0	5.04993e-14
chr21	14127936	14128035	14127940	non_blind	5	13159645	0	0	0.0883098
chr21	14128697	14128860	14128856	non_blind	3	13159646	0	0	0.0883098
chr21	14128857	14128907	14128861	blind	5	13159647	0	0	0.0883098
chr21	14128857	14128907	14128903	blind	3	13159648	0	0	0.0883098
chr21	14128904	14129653	14128908	non_blind	5	13159649	0	0	0.0883098
chr21	14129650	14130059	14130055	non_blind	3	13159650	0	0	0.0883098
chr21	14130056	14130506	14130060	non_blind	5	13159651	0	0	0.0883098
chr21	14130503	14130722	14130718	non_blind	3	13159652	0	0	0.0883098
chr21	14130719	14130831	14130723	non_blind	5	13159653	0	0	0.0883098
chr21	14130891	14131017	14130895	blind	5	13159655	0	0	0.0883098
chr21	14131647	14131708	14131704	non_blind	3	13159664	4	1.8545	0.0883098
chr21	14131705	14132075	14131709	non_blind	5	13159665	0	0	0.0883098
chr21	14132072	14132125	14132121	non_blind	3	13159666	0	0	0.0883098
chr21	14132122	14132195	14132126	non_blind	5	13159667	0	0	0.0883098
chr21	14132192	14132576	14132572	non_blind	3	13159668	0	0	0.0883098
chr21	14132582	14132783	14132779	non_blind	3	13159670	0	0	0.0883098
chr21	14132780	14132849	14132784	blind	5	13159671	0	0	0.0883098
chr21	14133101	14133294	14133290	non_blind	3	13159674	0	0	0.0883098
chr21	14133332	14133396	14133392	non_blind	3	13159676	0	0	0.0883098
chr21	14133836	14134029	14133840	blind	5	13159679	0	0	0.0883098
chr21	14134599	14134657	14134653	blind	3	13159688	0	0	0.0883098
chr21	14135568	14135802	14135572	non_blind	5	13159691	0	0	5.04993e-14
chr21	14136319	14136621	14136323	blind	5	13159693	0	0	5.04993e-14
chr21	14136319	14136621	14136617	blind	3	13159694	0	0	5.04993e-14
chr21	14136618	14136955	14136622	blind	5	13159695	0	0	5.04993e-14
chr21	14136952	14137051	14137047	blind	3	13159698	0	0	5.04993e-14
chr21	14137048	14137206	14137052	non_blind	5	13159699	0	0	5.04993e-14
chr21	14137688	14137928	14137692	non_blind	5	13159703	0	0	5.04993e-14
chr21	14138163	14138818	14138814	non_blind	3	13159704	0	0	5.04993e-14
chr21	14138815	14139405	14138819	non_blind	5	13159705	0	0	5.04993e-14
chr21	14139443	14139859	14139855	non_blind	3	13159706	0	0	5.04993e-14
chr21	14139856	14139981	14139860	non_blind	5	13159707	0	0	5.04993e-14
chr21	14140934	14141137	14141133	non_blind	3	13159708	0	0	5.04993e-14
chr21	14141134	14141707	14141138	non_blind	5	13159709	0	0	5.04993e-14
chr21	14142722	14142955	14142726	non_blind	5	13159711	0	0	5.04993e-14
chr21	14143236	14143696	14143240	non_blind	5	13159713	0	0	5.04993e-14
chr21	14143903	14144110	14144106	non_blind	3	13159714	0	0	5.04993e-14
chr21	14144107	14144208	14144111	non_blind	5	13159715	0	0	5.04993e-14
chr21	14145907	14146010	14145911	non_blind	5	13159719	0	0	5.04993e-14
chr21	14147015	14147069	14147019	non_blind	5	13159721	0	0	5.04993e-14
chr21	14147408	14147622	14147618	non_blind	3	13159722	0	0	5.04993e-14
chr21	14147619	14147682	14147623	non_blind	5	13159723	0	0	5.04993e-14
chr21	14147809	14147881	14147877	non_blind	3	13159724	0	0	5.04993e-14
chr21	14147888	14148138	14148134	non_blind	3	13159726	0	0	5.04993e-14
chr21	14148135	14148186	14148139	non_blind	5	13159727	0	0	5.04993e-14
chr21	14148183	14148268	14148264	non_blind	3	13159728	0	0	5.04993e-14
chr21	14148265	14148352	14148269	blind	5	13159729	0	0	5.04993e-14
chr21	14148265	14148352	14148348	blind	3	13159730	0	0	5.04993e-14
chr21	14148349	14148427	14148353	non_blind	5	13159731	0	0	5.04993e-14
chr21	14149278	14149459	14149282	non_blind	5	13159733	0	0	5.04993e-14
chr21	14149935	14150069	14149939	non_blind	5	13159737	0	0	5.04993e-14
chr21	14150344	14150429	14150425	non_blind	3	13159738	0	0	5.04993e-14
chr21	14150426	14150471	14150430	non_blind	5	13159739	0	0	5.04993e-14
chr21	14150468	14150530	14150526	non_blind	3	13159740	0	0	5.04993e-14
chr21	14150527	14150642	14150531	blind	5	13159741	0	0	5.04993e-14
chr21	14150527	14150642	14150638	blind	3	13159742	0	0	5.04993e-14
chr21	14152301	14152439	14152435	non_blind	3	13159744	0	0	5.04993e-14
chr21	14152436	14152895	14152440	non_blind	5	13159745	0	0	5.04993e-14
chr21	14152892	14152954	14152950	non_blind	3	13159746	0	0	5.04993e-14
chr21	14152951	14153035	14152955	blind	5	13159747	0	0	5.04993e-14
chr21	14152951	14153035	14153031	blind	3	13159748	0	0	5.04993e-14
chr21	14153032	14153526	14153036	non_blind	5	13159749	0	0	5.04993e-14
chr21	14154073	14154700	14154696	non_blind	3	13159750	0	0	5.04993e-14
chr21	14154707	14154863	14154859	non_blind	3	13159752	0	0	5.04993e-14
chr21	14154860	14154904	14154864	blind	5	13159753	0	0	5.04993e-14
chr21	14154860	14154904	14154900	blind	3	13159754	0	0	5.04993e-14
chr21	14154901	14155051	14154905	non_blind	5	13159755	0	0	5.04993e-14
chr21	14155215	14155337	14155333	non_blind	3	13159756	0	0	5.04993e-14
chr21	14155334	14155415	14155338	non_blind	5	13159757	0	0	5.04993e-14
chr21	14157383	14157505	14157501	non_blind	3	13159758	0	0	5.04993e-14
chr21	14157502	14157722	14157506	non_blind	5	13159759	0	0	5.04993e-14
chr21	14157820	14158112	14158108	non_blind	3	13159760	0	0	5.04993e-14
chr21	14158109	14158158	14158113	non_blind	5	13159761	0	0	5.04993e-14
chr21	14158193	14158351	14158197	non_blind	5	13159763	0	0	5.04993e-14
chr21	14158682	14159085	14159081	non_blind	3	13159764	0	0	5.04993e-14
chr21	14159082	14159407	14159086	blind	5	13159765	0	0	5.04993e-14
chr21	14159082	14159407	14159403	blind	3	13159766	0	0	5.04993e-14
chr21	14159404	14159640	14159408	non_blind	5	13159767	0	0	5.04993e-14
chr21	14159637	14159825	14159821	non_blind	3	13159768	0	0	5.04993e-14
chr21	14159822	14159938	14159826	blind	5	13159769	0	0	5.04993e-14
chr21	14159822	14159938	14159934	blind	3	13159770	0	0	5.04993e-14
chr21	14159935	14160015	14159939	non_blind	5	13159771	0	0	5.04993e-14
chr21	14160031	14160167	14160163	non_blind	3	13159772	0	0	5.04993e-14
chr21	14160177	14160641	14160637	non_blind	3	13159774	0	0	5.04993e-14
chr21	14160638	14160683	14160642	non_blind	5	13159775	0	0	5.04993e-14
chr21	14160680	14160740	14160736	non_blind	3	13159776	0	0	5.04993e-14
chr21	14160737	14161006	14160741	blind	5	13159777	0	0	5.04993e-14
chr21	14160737	14161006	14161002	blind	3	13159778	0	0	5.04993e-14
chr21	14161003	14161423	14161007	non_blind	5	13159779	0	0	5.04993e-14
chr21	14161420	14161485	14161481	non_blind	3	13159780	0	0	5.04993e-14
chr21	14161482	14162085	14161486	blind	5	13159781	0	0	5.04993e-14
chr21	14161482	14162085	14162081	blind	3	13159782	0	0	5.04993e-14
chr21	14162082	14162175	14162086	non_blind	5	13159783	0	0	5.04993e-14
chr21	14163131	14163255	14163251	non_blind	3	13159784	0	0	5.04993e-14
chr21	14163252	14163318	14163256	non_blind	5	13159785	0	0	5.04993e-14
chr21	14163315	14163606	14163602	non_blind	3	13159786	0	0	5.04993e-14
chr21	14163603	14163631	14163607	blind	5	13159787	0	0	5.04993e-14
chr21	14163603	14163631	14163627	blind	3	13159788	0	0	5.04993e-14
chr21	14164367	14164465	14164461	non_blind	3	13159790	0	0	5.04993e-14
chr21	14164462	14164560	14164466	non_blind	5	13159791	0	0	5.04993e-14
chr21	14164598	14164779	14164602	non_blind	5	13159793	0	0	5.04993e-14
chr21	14164818	14165016	14165012	non_blind	3	13159794	0	0	5.04993e-14
chr21	14165750	14166043	14166039	non_blind	3	13159796	0	0	5.04993e-14
chr21	14166040	14166075	14166044	non_blind	5	13159797	0	0	5.04993e-14
chr21	14166884	14166939	14166935	non_blind	3	13159798	0	0	5.04993e-14
chr21	14173051	14173238	14173234	non_blind	3	13159838	0	0	5.04993e-14
chr21	14173245	14173374	14173249	non_blind	5	13159841	0	0	5.04993e-14
chr21	14173371	14173418	14173414	non_blind	3	13159842	0	0	5.04993e-14
chr21	14173415	14173611	14173419	non_blind	5	13159843	0	0	5.04993e-14
chr21	14174213	14174267	14174263	non_blind	3	13159844	0	0	5.04993e-14
chr21	14174264	14174351	14174268	non_blind	5	13159845	0	0	5.04993e-14
chr21	14174633	14174703	14174637	non_blind	5	13159849	0	0	5.04993e-14
chr21	14177039	14177606	14177043	non_blind	5	13159859	0	0	5.04993e-14
chr21	14179392	14179439	14179396	blind	5	13159861	0	0	5.04993e-14
chr21	14179392	14179439	14179435	blind	3	13159862	0	0	5.04993e-14
chr21	14179436	14180061	14179440	blind	5	13159863	0	0	5.04993e-14
chr21	14179436	14180061	14180057	blind	3	13159864	0	0	5.04993e-14
chr21	14180786	14180858	14180854	non_blind	3	13159868	0	0	5.04993e-14
chr21	14180855	14181438	14180859	non_blind	5	13159869	0	0	5.04993e-14
chr21	14181450	14181479	14181454	non_blind	5	13159871	0	0	5.04993e-14
chr21	14186309	14186520	14186516	non_blind	3	13159884	0	0	5.04993e-14
chr21	14186517	14186721	14186521	non_blind	5	13159885	0	0	5.04993e-14
chr21	14186735	14186777	14186773	non_blind	3	13159886	0	0	5.04993e-14
chr21	14186774	14186798	14186778	non_blind	5	13159887	0	0	5.04993e-14
chr21	14186795	14187036	14187032	non_blind	3	13159888	0	0	5.04993e-14
chr21	14187033	14187145	14187037	blind	5	13159889	0	0	5.04993e-14
chr21	14187033	14187145	14187141	blind	3	13159890	0	0	5.04993e-14
chr21	14187142	14187238	14187146	non_blind	5	13159891	0	0	5.04993e-14
chr21	14187235	14187293	14187289	non_blind	3	13159892	0	0	5.04993e-14
chr21	14187421	14187760	14187756	non_blind	3	13159894	0	0	5.04993e-14
chr21	14187757	14187839	14187761	non_blind	5	13159895	0	0	5.04993e-14
chr21	14188140	14188220	14188144	blind	5	13159897	0	0	5.04993e-14
chr21	14188140	14188220	14188216	blind	3	13159898	0	0	5.04993e-14
chr21	14188217	14188347	14188221	blind	5	13159899	0	0	5.04993e-14
chr21	14189923	14189962	14189927	non_blind	5	13159905	0	0	5.04993e-14
chr21	14190766	14190947	14190943	non_blind	3	13159906	0	0	5.04993e-14
chr21	14190944	14191107	14190948	non_blind	5	13159907	0	0	5.04993e-14
chr21	14194353	14194591	14194587	non_blind	3	13159916	0	0	5.04993e-14
chr21	14194588	14194741	14194737	blind	3	13159918	0	0	5.04993e-14
chr21	14194761	14195248	14195244	non_blind	3	13159920	0	0	5.04993e-14
chr21	14195245	14195269	14195249	blind	5	13159921	0	0	5.04993e-14
chr21	14195245	14195269	14195265	blind	3	13159922	0	0	5.04993e-14
chr21	14195279	14195406	14195402	non_blind	3	13159924	0	0	5.04993e-14
chr21	14195403	14195625	14195407	non_blind	5	13159925	0	0	5.04993e-14
chr21	14198141	14198241	14198145	non_blind	5	13159933	0	0	5.04993e-14
chr21	14198633	14198744	14198637	blind	5	13159935	0	0	5.04993e-14
chr21	14199150	14199293	14199289	blind	3	13159940	0	0	5.04993e-14
chr21	14200897	14200982	14200901	blind	5	13159947	0	0	5.04993e-14
chr21	14200897	14200982	14200978	blind	3	13159948	0	0	5.04993e-14
chr21	14203920	14204007	14203924	non_blind	5	13159967	0	0	5.04993e-14
chr21	14204780	14204837	14204833	non_blind	3	13159968	0	0	5.04993e-14
chr21	14204834	14205276	14204838	non_blind	5	13159969	0	0	5.04993e-14
chr21	14205525	14205868	14205864	non_blind	3	13159970	0	0	5.04993e-14
chr21	14205865	14206071	14205869	non_blind	5	13159971	0	0	5.04993e-14
chr21	14206733	14206820	14206816	non_blind	3	13159972	0	0	5.04993e-14
chr21	14206817	14206875	14206821	non_blind	5	13159973	0	0	5.04993e-14
chr21	14206965	14207372	14207368	non_blind	3	13159974	0	0	5.04993e-14
chr21	14207369	14207580	14207576	blind	3	13159976	0	0	5.04993e-14
chr21	14207577	14207729	14207581	non_blind	5	13159977	0	0	5.04993e-14
chr21	14208009	14208098	14208013	blind	5	13159979	0	0	5.04993e-14
chr21	14208009	14208098	14208094	blind	3	13159980	0	0	0.0220774
chr21	14208095	14208171	14208099	non_blind	5	13159981	0	0	0.0220774
chr21	14208999	14209223	14209219	non_blind	3	13159984	0	0	0.0220774
chr21	14209220	14209335	14209224	non_blind	5	13159985	0	0	0.0220774
chr21	14209508	14209534	14209530	non_blind	3	13159986	0	0	0.0220774
chr21	14209531	14210621	14209535	non_blind	5	13159987	0	0	0.0220774
chr21	14210618	14210805	14210801	non_blind	3	13159988	0	0	0.0220774
chr21	14210802	14210930	14210806	blind	5	13159989	0	0	0.0220774
chr21	14210802	14210930	14210926	blind	3	13159990	0	0	0.0220774
chr21	14210927	14211492	14210931	non_blind	5	13159991	0	0	0.0220774
chr21	14211489	14211797	14211793	non_blind	3	13159992	1	0.463626	0.0220774
chr21	14211794	14211814	14211798	non_blind	5	13159993	0	0	0.0220774
chr21	14212705	14212847	14212843	non_blind	3	13159994	0	0	0.0220774
chr21	14212844	14212944	14212848	non_blind	5	13159995	0	0	0.0220774
chr21	14214284	14214317	14214313	non_blind	3	13159998	0	0	0.0220774
chr21	14214314	14214552	14214318	non_blind	5	13159999	0	0	0.0220774
chr21	14214549	14214719	14214715	non_blind	3	13160000	0	0	0.0220774
chr21	14214716	14215094	14214720	blind	5	13160001	0	0	0.0220774
chr21	14214716	14215094	14215090	blind	3	13160002	0	0	0.0220774
chr21	14215091	14215179	14215095	non_blind	5	13160003	0	0	0.0220774
chr21	14215176	14215243	14215239	non_blind	3	13160004	0	0	0.0220774
chr21	14215240	14215261	14215244	non_blind	5	13160005	0	0	5.04993e-14
chr21	14215266	14215499	14215270	blind	5	13160007	0	0	5.04993e-14
chr21	14215266	14215499	14215495	blind	3	13160008	0	0	5.04993e-14
chr21	14215496	14215709	14215500	non_blind	5	13160009	0	0	5.04993e-14
chr21	14216731	14216847	14216843	non_blind	3	13160010	0	0	5.04993e-14
chr21	14216844	14216975	14216848	blind	5	13160011	0	0	5.04993e-14
chr21	14216844	14216975	14216971	blind	3	13160012	0	0	5.04993e-14
chr21	14216972	14217890	14216976	blind	5	13160013	0	0	5.04993e-14
chr21	14216972	14217890	14217886	blind	3	13160014	0	0	5.04993e-14
chr21	14217887	14217909	14217891	blind	5	13160015	0	0	5.04993e-14
chr21	14217887	14217909	14217905	blind	3	13160016	0	0	5.04993e-14
chr21	14217906	14217990	14217910	blind	5	13160017	0	0	5.04993e-14
chr21	14217906	14217990	14217986	blind	3	13160018	0	0	5.04993e-14
chr21	14217987	14218172	14217991	non_blind	5	13160019	0	0	5.04993e-14
chr21	14218507	14218641	14218637	non_blind	3	13160020	0	0	5.04993e-14
chr21	14218638	14218783	14218642	non_blind	5	13160021	0	0	5.04993e-14
chr21	14220165	14220302	14220298	non_blind	3	13160022	0	0	5.04993e-14
chr21	14221461	14221724	14221465	non_blind	5	13160025	0	0	5.04993e-14
chr21	14222125	14222228	14222224	non_blind	3	13160026	0	0	5.04993e-14
chr21	14222225	14222287	14222229	blind	5	13160027	0	0	5.04993e-14
chr21	14222225	14222287	14222283	blind	3	13160028	0	0	5.04993e-14
chr21	14222284	14222660	14222288	non_blind	5	13160029	0	0	5.04993e-14
chr21	14223537	14223601	14223597	non_blind	3	13160030	0	0	5.04993e-14
chr21	14223760	14223837	14223833	non_blind	3	13160032	0	0	5.04993e-14
chr21	14223898	14223964	14223960	non_blind	3	13160034	0	0	5.04993e-14
chr21	14223961	14223991	14223965	non_blind	5	13160035	0	0	5.04993e-14
chr21	14224312	14224464	14224460	non_blind	3	13160036	0	0	5.04993e-14
chr21	14226045	14226097	14226093	non_blind	3	13160040	0	0	5.04993e-14
chr21	14227108	14227327	14227323	blind	3	13160048	0	0	5.04993e-14
chr21	14227324	14227382	14227328	non_blind	5	13160049	0	0	5.04993e-14
chr21	14227896	14228052	14227900	non_blind	5	13160051	0	0	5.04993e-14
chr21	14228743	14229077	14229073	non_blind	3	13160056	0	0	5.04993e-14
chr21	14229210	14229232	14229228	non_blind	3	13160058	0	0	5.04993e-14
chr21	14230980	14231028	14231024	non_blind	3	13160068	0	0	5.04993e-14
chr21	14231025	14231199	14231029	non_blind	5	13160069	0	0	5.04993e-14
chr21	14232325	14232494	14232490	non_blind	3	13160070	0	0	5.04993e-14
chr21	14232491	14232918	14232495	non_blind	5	13160071	0	0	5.04993e-14
chr21	14232921	14233136	14233132	non_blind	3	13160072	0	0	5.04993e-14
chr21	14233133	14233256	14233137	blind	5	13160073	0	0	5.04993e-14
chr21	14233133	14233256	14233252	blind	3	13160074	0	0	5.04993e-14
chr21	14233253	14233492	14233257	non_blind	5	13160075	0	0	5.04993e-14
chr21	14234059	14234451	14234447	non_blind	3	13160076	0	0	5.04993e-14
chr21	14234448	14234678	14234452	non_blind	5	13160077	0	0	5.04993e-14
chr21	14234675	14235057	14235053	non_blind	3	13160078	0	0	5.04993e-14
chr21	14235398	14235439	14235402	non_blind	5	13160085	0	0	5.04993e-14
chr21	14235436	14235569	14235565	non_blind	3	13160086	0	0	5.04993e-14
chr21	14235566	14235742	14235570	non_blind	5	13160087	0	0	5.04993e-14
chr21	14235739	14236050	14236046	non_blind	3	13160088	0	0	5.04993e-14
chr21	14237233	14237257	14237253	non_blind	3	13160090	0	0	5.04993e-14
chr21	14237254	14237277	14237258	blind	5	13160091	0	0	5.04993e-14
chr21	14237254	14237277	14237273	blind	3	13160092	0	0	5.04993e-14
chr21	14237274	14237430	14237278	blind	5	13160093	0	0	5.04993e-14
chr21	14237274	14237430	14237426	blind	3	13160094	0	0	5.04993e-14
chr21	14237427	14237449	14237431	non_blind	5	13160095	0	0	5.04993e-14
chr21	14237446	14237501	14237497	non_blind	3	13160096	0	0	5.04993e-14
chr21	14237498	14237623	14237502	blind	5	13160097	0	0	5.04993e-14
chr21	14237498	14237623	14237619	blind	3	13160098	0	0	5.04993e-14
chr21	14237620	14238077	14237624	blind	5	13160099	0	0	5.04993e-14
chr21	14237620	14238077	14238073	blind	3	13160100	0	0	5.04993e-14
chr21	14238074	14238267	14238078	blind	5	13160101	0	0	5.04993e-14
chr21	14238074	14238267	14238263	blind	3	13160102	0	0	5.04993e-14
chr21	14238264	14238949	14238268	non_blind	5	13160103	0	0	5.04993e-14
chr21	14239026	14239059	14239055	non_blind	3	13160104	0	0	5.04993e-14
chr21	14239056	14239122	14239060	non_blind	5	13160105	0	0	5.04993e-14
chr21	14239297	14239424	14239420	non_blind	3	13160106	0	0	5.04993e-14
chr21	14239421	14239439	14239425	blind	5	13160107	0	0	5.04993e-14
chr21	14239421	14239439	14239435	blind	3	13160108	0	0	5.04993e-14
chr21	14239436	14239750	14239440	non_blind	5	13160109	0	0	5.04993e-14
chr21	14240045	14240501	14240497	non_blind	3	13160110	0	0	5.04993e-14
chr21	14240498	14240992	14240502	non_blind	5	13160111	0	0	5.04993e-14
chr21	14241384	14241450	14241446	non_blind	3	13160112	0	0	5.04993e-14
chr21	14241447	14241518	14241451	blind	5	13160113	0	0	5.04993e-14
chr21	14242390	14242531	14242527	blind	3	13160120	0	0	5.04993e-14
chr21	14243018	14243074	14243070	non_blind	3	13160124	0	0	5.04993e-14
chr21	14243071	14243111	14243075	non_blind	5	13160125	0	0	5.04993e-14
chr21	14243165	14243222	14243218	non_blind	3	13160126	0	0	5.04993e-14
chr21	14243219	14243285	14243281	blind	3	13160128	0	0	5.04993e-14
chr21	14243282	14243378	14243286	non_blind	5	13160129	0	0	5.04993e-14
chr21	14243375	14244020	14244016	non_blind	3	13160130	0	0	5.04993e-14
chr21	14244085	14244390	14244386	non_blind	3	13160132	0	0	5.04993e-14
chr21	14244387	14244466	14244391	non_blind	5	13160133	0	0	5.04993e-14
chr21	14244782	14244866	14244862	non_blind	3	13160134	0	0	5.04993e-14
chr21	14244863	14244901	14244867	non_blind	5	13160135	0	0	5.04993e-14
chr21	14246117	14246255	14246251	non_blind	3	13160136	0	0	5.04993e-14
chr21	14246252	14246622	14246256	blind	5	13160137	0	0	5.04993e-14
chr21	14246252	14246622	14246618	blind	3	13160138	0	0	5.04993e-14
chr21	14246700	14246794	14246790	non_blind	3	13160140	0	0	5.04993e-14
chr21	14246791	14246812	14246795	blind	5	13160141	0	0	5.04993e-14
chr21	14246791	14246812	14246808	blind	3	13160142	0	0	5.04993e-14
chr21	14246809	14247027	14246813	blind	5	13160143	0	0	5.04993e-14
chr21	14246809	14247027	14247023	blind	3	13160144	0	0	5.04993e-14
chr21	14247027	14247279	14247275	non_blind	3	13160146	0	0	0.0441549
chr21	14247276	14247746	14247280	non_blind	5	13160147	0	0	0.0441549
chr21	14247771	14247836	14247832	non_blind	3	13160148	0	0	0.0441549
chr21	14247833	14247907	14247837	non_blind	5	13160149	0	0	0.0441549
chr21	14248642	14248670	14248646	non_blind	5	13160153	0	0	0.0441549
chr21	14248857	14248886	14248882	non_blind	3	13160154	0	0	0.0441549
chr21	14248883	14249050	14248887	non_blind	5	13160155	0	0	0.0441549
chr21	14249937	14249966	14249941	blind	5	13160157	0	0	0.0441549
chr21	14249937	14249966	14249962	blind	3	13160158	0	0	0.0441549
chr21	14250526	14250609	14250605	non_blind	3	13160164	0	0	0.0441549
chr21	14250606	14250684	14250610	non_blind	5	13160165	2	0.927252	0.0441549
chr21	14251300	14251352	14251348	non_blind	3	13160166	0	0	0.0441549
chr21	14251349	14251492	14251353	non_blind	5	13160167	0	0	0.0441549
chr21	14252101	14252572	14252568	non_blind	3	13160168	0	0	0.0441549
chr21	14252569	14252608	14252573	non_blind	5	13160169	0	0	0.0441549
chr21	14252821	14253315	14253311	non_blind	3	13160170	0	0	0.0441549
chr21	14253312	14253923	14253316	non_blind	5	13160171	0	0	0.0441549
chr21	14254296	14254328	14254324	non_blind	3	13160172	0	0	0.0441549
chr21	14254325	14254523	14254329	non_blind	5	13160173	0	0	0.0441549
chr21	14254520	14254775	14254771	non_blind	3	13160174	0	0	0.0441549
chr21	14254772	14254799	14254776	blind	5	13160175	0	0	0.0441549
chr21	14254772	14254799	14254795	blind	3	13160176	0	0	5.04993e-14
chr21	14254796	14254838	14254800	blind	5	13160177	0	0	5.04993e-14
chr21	14254796	14254838	14254834	blind	3	13160178	0	0	5.04993e-14
chr21	14254835	14254883	14254839	blind	5	13160179	0	0	5.04993e-14
chr21	14254835	14254883	14254879	blind	3	13160180	0	0	5.04993e-14
chr21	14254880	14255168	14254884	non_blind	5	13160181	0	0	5.04993e-14
chr21	14255448	14255484	14255452	non_blind	5	13160183	0	0	5.04993e-14
chr21	14256951	14257180	14257176	non_blind	3	13160192	0	0	5.04993e-14
chr21	14257177	14257378	14257181	blind	5	13160193	0	0	5.04993e-14
chr21	14257177	14257378	14257374	blind	3	13160194	0	0	5.04993e-14
chr21	14257375	14257539	14257379	blind	5	13160195	0	0	5.04993e-14
chr21	14257375	14257539	14257535	blind	3	13160196	0	0	5.04993e-14
chr21	14257536	14257852	14257540	non_blind	5	13160197	0	0	5.04993e-14
chr21	14258170	14258404	14258400	blind	3	13160200	0	0	5.04993e-14
chr21	14258401	14258703	14258405	non_blind	5	13160201	0	0	5.04993e-14
chr21	14258700	14258735	14258731	non_blind	3	13160202	0	0	5.04993e-14
chr21	14258950	14259624	14259620	non_blind	3	13160206	0	0	5.04993e-14
chr21	14259621	14259723	14259625	non_blind	5	13160207	0	0	5.04993e-14
chr21	14260186	14260340	14260336	non_blind	3	13160208	0	0	5.04993e-14
chr21	14260337	14260554	14260341	blind	5	13160209	0	0	5.04993e-14
chr21	14260337	14260554	14260550	blind	3	13160210	0	0	5.04993e-14
chr21	14260551	14260657	14260555	non_blind	5	13160211	0	0	5.04993e-14
chr21	14262739	14262773	14262769	non_blind	3	13160212	0	0	5.04993e-14
chr21	14262770	14262858	14262774	non_blind	5	13160213	0	0	5.04993e-14
chr21	14262964	14263318	14263314	non_blind	3	13160214	0	0	5.04993e-14
chr21	14263315	14263428	14263319	non_blind	5	13160215	0	0	5.04993e-14
chr21	14263425	14263567	14263563	non_blind	3	13160216	0	0	5.04993e-14
chr21	14263564	14263694	14263568	blind	5	13160217	0	0	5.04993e-14
chr21	14263564	14263694	14263690	blind	3	13160218	0	0	5.04993e-14
chr21	14263691	14263895	14263695	non_blind	5	13160219	0	0	5.04993e-14
chr21	14265064	14265216	14265212	non_blind	3	13160220	0	0	5.04993e-14
chr21	14265213	14265269	14265217	non_blind	5	13160221	0	0	5.04993e-14
chr21	14265712	14265782	14265778	non_blind	3	13160224	0	0	5.04993e-14
chr21	14265779	14265876	14265783	non_blind	5	13160225	0	0	5.04993e-14
chr21	14266177	14266346	14266342	non_blind	3	13160226	0	0	5.04993e-14
chr21	14266343	14266500	14266347	blind	5	13160227	0	0	5.04993e-14
chr21	14266343	14266500	14266496	blind	3	13160228	0	0	5.04993e-14
chr21	14266497	14266612	14266501	non_blind	5	13160229	0	0	5.04993e-14
chr21	14266609	14266850	14266846	non_blind	3	13160230	0	0	5.04993e-14
chr21	14266847	14266927	14266851	non_blind	5	13160231	0	0	5.04993e-14
chr21	14267093	14267419	14267415	non_blind	3	13160232	0	0	5.04993e-14
chr21	14267416	14267465	14267420	non_blind	5	13160233	0	0	5.04993e-14
chr21	14267572	14267831	14267827	non_blind	3	13160234	0	0	5.04993e-14
chr21	14267828	14268003	14267832	non_blind	5	13160235	0	0	5.04993e-14
chr21	14268917	14268996	14268921	blind	5	13160237	0	0	0.728555
chr21	14269030	14269332	14269328	non_blind	3	13160242	0	0	0.86102
chr21	14269329	14269385	14269333	non_blind	5	13160243	0	0	0.86102
chr21	14269680	14269766	14269762	non_blind	3	13160244	0	0	0.86102
chr21	14269763	14269837	14269767	non_blind	5	13160245	0	0	0.86102
chr21	14269834	14269880	14269876	non_blind	3	13160246	0	0	0.86102
chr21	14270195	14270299	14270199	non_blind	5	13160251	0	0	0.86102
chr21	14270737	14270758	14270754	non_blind	3	13160252	0	0	0.86102
chr21	14270755	14270929	14270759	non_blind	5	13160253	0	0	0.86102
chr21	14271021	14271180	14271176	non_blind	3	13160254	0	0	0.86102
chr21	14271177	14271297	14271181	non_blind	5	13160255	33	15.2997	0.86102
chr21	14271963	14272075	14272071	non_blind	3	13160256	6	2.78176	0.86102
chr21	14272072	14272179	14272076	non_blind	5	13160257	0	0	0.86102
chr21	14274091	14274343	14274339	non_blind	3	13160258	0	0	0.86102
chr21	14274347	14274523	14274351	blind	5	13160261	0	0	0.86102
chr21	14274347	14274523	14274519	blind	3	13160262	0	0	0.86102
chr21	14274520	14274648	14274524	non_blind	5	13160263	0	0	0.86102
chr21	14274773	14274901	14274897	non_blind	3	13160264	0	0	0.86102
chr21	14274898	14275030	14274902	non_blind	5	13160265	0	0	0.86102
chr21	14275027	14275112	14275108	non_blind	3	13160266	0	0	0.86102
chr21	14275109	14275254	14275113	blind	5	13160267	0	0	0.86102
chr21	14275109	14275254	14275250	blind	3	13160268	0	0	0.132465
chr21	14275251	14275403	14275255	non_blind	5	13160269	0	0	5.04993e-14
chr21	14275491	14275625	14275621	non_blind	3	13160270	0	0	5.04993e-14
chr21	14275622	14275696	14275626	non_blind	5	13160271	0	0	5.04993e-14
chr21	14276170	14276235	14276231	non_blind	3	13160272	0	0	5.04993e-14
chr21	14276232	14276262	14276236	blind	5	13160273	0	0	5.04993e-14
chr21	14276232	14276262	14276258	blind	3	13160274	0	0	5.04993e-14
chr21	14276259	14276436	14276263	non_blind	5	13160275	0	0	5.04993e-14
chr21	14276433	14276484	14276480	non_blind	3	13160276	0	0	5.04993e-14
chr21	14276904	14276980	14276976	non_blind	3	13160278	0	0	5.04993e-14
chr21	14276977	14277162	14276981	non_blind	5	13160279	0	0	5.04993e-14
chr21	14277314	14277374	14277370	non_blind	3	13160280	0	0	5.04993e-14
chr21	14277988	14278030	14277992	non_blind	5	13160283	0	0	5.04993e-14
chr21	14278027	14278260	14278256	non_blind	3	13160284	0	0	5.04993e-14
chr21	14278257	14278742	14278261	blind	5	13160285	0	0	5.04993e-14
chr21	14278257	14278742	14278738	blind	3	13160286	0	0	5.04993e-14
chr21	14278739	14279362	14278743	non_blind	5	13160287	0	0	5.04993e-14
chr21	14279506	14279705	14279701	non_blind	3	13160288	0	0	5.04993e-14
chr21	14279702	14279999	14279706	non_blind	5	13160289	0	0	5.04993e-14
chr21	14281890	14281930	14281894	non_blind	5	13160295	0	0	5.04993e-14
chr21	14282324	14282895	14282328	blind	5	13160297	0	0	5.04993e-14
chr21	14283343	14283609	14283347	blind	5	13160301	0	0	5.04993e-14
chr21	14283343	14283609	14283605	blind	3	13160302	0	0	5.04993e-14
chr21	14283618	14283680	14283622	non_blind	5	13160305	0	0	5.04993e-14
chr21	14284136	14284314	14284140	non_blind	5	13160311	0	0	5.04993e-14
chr21	14285202	14285290	14285206	non_blind	5	13160315	0	0	5.04993e-14
chr21	14286534	14286681	14286677	non_blind	3	13160316	0	0	5.04993e-14
chr21	14286678	14286725	14286682	non_blind	5	13160317	0	0	5.04993e-14
chr21	14286722	14286761	14286757	non_blind	3	13160318	0	0	5.04993e-14
chr21	14286758	14287593	14286762	blind	5	13160319	0	0	5.04993e-14
chr21	14286758	14287593	14287589	blind	3	13160320	0	0	5.04993e-14
chr21	14287590	14287927	14287594	non_blind	5	13160321	0	0	5.04993e-14
chr21	14288674	14289103	14289099	non_blind	3	13160322	0	0	5.04993e-14
chr21	14289504	14289703	14289699	non_blind	3	13160324	0	0	5.04993e-14
chr21	14289700	14289861	14289704	non_blind	5	13160325	0	0	5.04993e-14
chr21	14289858	14289892	14289888	non_blind	3	13160326	0	0	5.04993e-14
chr21	14289889	14289946	14289893	non_blind	5	13160327	0	0	5.04993e-14
chr21	14290270	14290466	14290462	non_blind	3	13160328	0	0	5.04993e-14
chr21	14290463	14290750	14290467	blind	5	13160329	0	0	5.04993e-14
chr21	14290463	14290750	14290746	blind	3	13160330	0	0	5.04993e-14
chr21	14290747	14290824	14290751	non_blind	5	13160331	0	0	5.04993e-14
chr21	14290892	14291040	14291036	non_blind	3	13160332	0	0	5.04993e-14
chr21	14291119	14291179	14291175	non_blind	3	13160334	0	0	5.04993e-14
chr21	14291176	14291204	14291180	non_blind	5	13160335	0	0	5.04993e-14
chr21	14291693	14291738	14291734	non_blind	3	13160336	0	0	5.04993e-14
chr21	14291735	14291934	14291739	non_blind	5	13160337	0	0	5.04993e-14
chr21	14292069	14292253	14292249	non_blind	3	13160338	0	0	5.04993e-14
chr21	14292250	14292317	14292254	non_blind	5	13160339	0	0	5.04993e-14
chr21	14292615	14292648	14292644	non_blind	3	13160340	0	0	5.04993e-14
chr21	14292645	14292809	14292649	blind	5	13160341	0	0	5.04993e-14
chr21	14292645	14292809	14292805	blind	3	13160342	0	0	5.04993e-14
chr21	14292806	14292831	14292810	non_blind	5	13160343	0	0	5.04993e-14
chr21	14292828	14292848	14292844	non_blind	3	13160344	0	0	5.04993e-14
chr21	14292845	14293081	14292849	non_blind	5	13160345	0	0	5.04993e-14
chr21	14293146	14293189	14293185	non_blind	3	13160346	0	0	5.04993e-14
chr21	14293186	14293404	14293190	non_blind	5	13160347	0	0	5.04993e-14
chr21	14293401	14293638	14293634	non_blind	3	13160348	0	0	5.04993e-14
chr21	14293635	14293705	14293701	blind	3	13160350	0	0	5.04993e-14
chr21	14293702	14293723	14293706	blind	5	13160351	0	0	5.04993e-14
chr21	14293702	14293723	14293719	blind	3	13160352	0	0	5.04993e-14
chr21	14293720	14293758	14293724	non_blind	5	13160353	0	0	5.04993e-14
chr21	14294059	14294250	14294246	non_blind	3	13160354	0	0	5.04993e-14
chr21	14294247	14294333	14294251	non_blind	5	13160355	0	0	5.04993e-14
chr21	14294958	14295000	14294996	non_blind	3	13160362	0	0	5.04993e-14
chr21	14294997	14295049	14295001	non_blind	5	13160363	0	0	5.04993e-14
chr21	14295077	14295131	14295127	non_blind	3	13160364	0	0	5.04993e-14
chr21	14295189	14295239	14295193	non_blind	5	13160367	0	0	5.04993e-14
chr21	14295330	14295349	14295345	non_blind	3	13160368	0	0	5.04993e-14
chr21	14295550	14296166	14296162	non_blind	3	13160370	0	0	5.04993e-14
chr21	14296163	14296254	14296167	non_blind	5	13160371	0	0	5.04993e-14
chr21	14296302	14296554	14296550	non_blind	3	13160372	0	0	5.04993e-14
chr21	14296551	14296653	14296555	non_blind	5	13160373	0	0	5.04993e-14
chr21	14297674	14297754	14297750	non_blind	3	13160376	0	0	5.04993e-14
chr21	14297751	14297895	14297755	non_blind	5	13160377	0	0	5.04993e-14
chr21	14299913	14300040	14300036	non_blind	3	13160382	0	0	0.0220774
chr21	14300037	14300143	14300041	non_blind	5	13160383	0	0	0.0220774
chr21	14300291	14300456	14300452	non_blind	3	13160384	0	0	0.0220774
chr21	14300453	14300482	14300457	non_blind	5	13160385	0	0	0.0220774
chr21	14300530	14300567	14300563	non_blind	3	13160386	0	0	0.0220774
chr21	14300564	14300600	14300568	non_blind	5	13160387	0	0	0.154542
chr21	14302129	14302168	14302164	non_blind	3	13160388	0	0	0.154542
chr21	14302165	14302526	14302169	blind	5	13160389	0	0	0.154542
chr21	14302165	14302526	14302522	blind	3	13160390	0	0	0.154542
chr21	14302523	14302737	14302527	non_blind	5	13160391	0	0	0.154542
chr21	14303510	14303684	14303680	blind	3	13160398	1	0.463626	0.154542
chr21	14303681	14304199	14303685	blind	5	13160399	0	0	0.154542
chr21	14303681	14304199	14304195	blind	3	13160400	0	0	0.154542
chr21	14304196	14304225	14304200	blind	5	13160401	0	0	0.154542
chr21	14304196	14304225	14304221	blind	3	13160402	0	0	0.154542
chr21	14304222	14304242	14304226	non_blind	5	13160403	6	2.78176	0.154542
chr21	14304239	14304283	14304279	non_blind	3	13160404	0	0	0.154542
chr21	14304280	14304333	14304284	non_blind	5	13160405	0	0	0.154542
chr21	14305529	14305827	14305823	non_blind	3	13160406	0	0	0.154542
chr21	14305824	14306028	14305828	non_blind	5	13160407	0	0	0.154542
chr21	14306025	14306221	14306217	non_blind	3	13160408	0	0	0.154542
chr21	14306218	14306441	14306222	blind	5	13160409	0	0	0.132465
chr21	14306218	14306441	14306437	blind	3	13160410	0	0	0.132465
chr21	14306438	14306667	14306442	non_blind	5	13160411	0	0	0.132465
chr21	14306664	14307197	14307193	non_blind	3	13160412	0	0	0.132465
chr21	14307194	14307496	14307198	non_blind	5	13160413	0	0	0.132465
chr21	14307599	14307774	14307770	non_blind	3	13160414	0	0	5.04993e-14
chr21	14307771	14307987	14307775	non_blind	5	13160415	0	0	5.04993e-14
chr21	14307984	14308169	14308165	non_blind	3	13160416	0	0	5.04993e-14
chr21	14308166	14308555	14308170	blind	5	13160417	0	0	5.04993e-14
chr21	14308166	14308555	14308551	blind	3	13160418	0	0	5.04993e-14
chr21	14309041	14309494	14309490	non_blind	3	13160420	0	0	5.04993e-14
chr21	14309491	14309777	14309495	blind	5	13160421	0	0	5.04993e-14
chr21	14309491	14309777	14309773	blind	3	13160422	0	0	5.04993e-14
chr21	14309774	14309934	14309778	non_blind	5	13160423	0	0	5.04993e-14
chr21	14310198	14310412	14310408	non_blind	3	13160424	0	0	5.04993e-14
chr21	14310409	14310575	14310413	blind	5	13160425	0	0	5.04993e-14
chr21	14310409	14310575	14310571	blind	3	13160426	0	0	5.04993e-14
chr21	14310572	14311105	14310576	non_blind	5	13160427	0	0	5.04993e-14
chr21	14311102	14311279	14311275	non_blind	3	13160428	0	0	5.04993e-14
chr21	14311276	14311355	14311280	non_blind	5	13160429	0	0	5.04993e-14
chr21	14311352	14311532	14311528	non_blind	3	13160430	0	0	5.04993e-14
chr21	14311539	14311563	14311543	blind	5	13160433	0	0	5.04993e-14
chr21	14311539	14311563	14311559	blind	3	13160434	0	0	5.04993e-14
chr21	14311560	14311669	14311564	non_blind	5	13160435	0	0	5.04993e-14
chr21	14311757	14311911	14311907	non_blind	3	13160436	0	0	5.04993e-14
chr21	14311908	14311952	14311912	blind	5	13160437	0	0	5.04993e-14
chr21	14311908	14311952	14311948	blind	3	13160438	0	0	5.04993e-14
chr21	14311949	14312112	14311953	non_blind	5	13160439	0	0	5.04993e-14
chr21	14312109	14312221	14312217	non_blind	3	13160440	0	0	5.04993e-14
chr21	14312218	14312479	14312222	non_blind	5	13160441	0	0	5.04993e-14
chr21	14312787	14312858	14312791	non_blind	5	13160443	0	0	5.04993e-14
chr21	14313021	14313100	14313096	non_blind	3	13160444	0	0	5.04993e-14
chr21	14313097	14313144	14313101	non_blind	5	13160445	0	0	5.04993e-14
chr21	14313141	14313383	14313379	non_blind	3	13160446	0	0	5.04993e-14
chr21	14313380	14313781	14313384	non_blind	5	13160447	0	0	5.04993e-14
chr21	14314191	14314371	14314367	non_blind	3	13160448	0	0	5.04993e-14
chr21	14314368	14314392	14314372	non_blind	5	13160449	0	0	5.04993e-14
chr21	14315395	14315579	14315575	non_blind	3	13160450	0	0	5.04993e-14
chr21	14315576	14315643	14315580	non_blind	5	13160451	0	0	5.04993e-14
chr21	14316108	14316154	14316150	non_blind	3	13160452	0	0	5.04993e-14
chr21	14316151	14316288	14316155	blind	5	13160453	0	0	5.04993e-14
chr21	14316151	14316288	14316284	blind	3	13160454	0	0	5.04993e-14
chr21	14316285	14316312	14316289	non_blind	5	13160455	0	0	5.04993e-14
chr21	14317962	14318061	14318057	non_blind	3	13160456	0	0	5.04993e-14
chr21	14318058	14318186	14318062	blind	5	13160457	0	0	5.04993e-14
chr21	14318058	14318186	14318182	blind	3	13160458	0	0	5.04993e-14
chr21	14318183	14318289	14318187	non_blind	5	13160459	0	0	5.04993e-14
chr21	14318286	14318327	14318323	non_blind	3	13160460	0	0	5.04993e-14
chr21	14318324	14318443	14318328	non_blind	5	13160461	0	0	5.04993e-14
chr21	14318440	14318522	14318518	non_blind	3	13160462	0	0	5.04993e-14
chr21	14318519	14318549	14318523	non_blind	5	13160463	0	0	5.04993e-14
chr21	14319048	14319317	14319313	non_blind	3	13160464	0	0	5.04993e-14
chr21	14319314	14319421	14319318	non_blind	5	13160465	0	0	5.04993e-14
chr21	14319418	14319571	14319567	non_blind	3	13160466	0	0	5.04993e-14
chr21	14319568	14319693	14319572	non_blind	5	13160467	0	0	5.04993e-14
chr21	14320119	14320166	14320162	non_blind	3	13160468	0	0	5.04993e-14
chr21	14320163	14320270	14320167	non_blind	5	13160469	0	0	5.04993e-14
chr21	14320267	14320466	14320462	non_blind	3	13160470	0	0	5.04993e-14
chr21	14320463	14320798	14320467	non_blind	5	13160471	0	0	5.04993e-14
chr21	14321875	14322001	14321997	blind	3	13160478	0	0	5.04993e-14
chr21	14322583	14322608	14322604	non_blind	3	13160480	0	0	5.04993e-14
chr21	14322609	14323138	14322613	non_blind	5	13160483	0	0	5.04993e-14
chr21	14323135	14323208	14323204	non_blind	3	13160484	0	0	5.04993e-14
chr21	14323205	14323398	14323209	blind	5	13160485	0	0	5.04993e-14
chr21	14323205	14323398	14323394	blind	3	13160486	0	0	5.04993e-14
chr21	14323395	14323517	14323399	non_blind	5	13160487	0	0	5.04993e-14
chr21	14323514	14323676	14323672	non_blind	3	13160488	0	0	5.04993e-14
chr21	14323673	14323935	14323677	non_blind	5	13160489	0	0	5.04993e-14
chr21	14324627	14324780	14324776	non_blind	3	13160494	0	0	5.04993e-14
chr21	14324777	14324809	14324781	blind	5	13160495	0	0	5.04993e-14
chr21	14324777	14324809	14324805	blind	3	13160496	0	0	5.04993e-14
chr21	14324806	14324967	14324810	blind	5	13160497	0	0	5.04993e-14
chr21	14324806	14324967	14324963	blind	3	13160498	0	0	5.04993e-14
chr21	14324973	14325027	14324977	non_blind	5	13160501	0	0	5.04993e-14
chr21	14325024	14325079	14325075	non_blind	3	13160502	0	0	5.04993e-14
chr21	14325076	14325165	14325080	non_blind	5	13160503	0	0	5.04993e-14
chr21	14325215	14325344	14325340	non_blind	3	13160504	0	0	5.04993e-14
chr21	14325341	14325601	14325345	non_blind	5	13160505	0	0	5.04993e-14
chr21	14325598	14325657	14325653	non_blind	3	13160506	0	0	5.04993e-14
chr21	14325654	14325737	14325658	non_blind	5	13160507	0	0	5.04993e-14
chr21	14325734	14326143	14326139	non_blind	3	13160508	0	0	5.04993e-14
chr21	14326140	14326441	14326144	blind	5	13160509	0	0	5.04993e-14
chr21	14326140	14326441	14326437	blind	3	13160510	0	0	5.04993e-14
chr21	14326438	14326622	14326442	non_blind	5	13160511	0	0	5.04993e-14
chr21	14326619	14326672	14326668	non_blind	3	13160512	0	0	5.04993e-14
chr21	14327406	14327780	14327776	blind	3	13160518	0	0	5.04993e-14
chr21	14327777	14327848	14327781	non_blind	5	13160519	0	0	5.04993e-14
chr21	14330312	14330497	14330493	blind	3	13160540	0	0	5.04993e-14
chr21	14332222	14332547	14332543	non_blind	3	13160546	0	0	5.04993e-14
chr21	14332544	14332893	14332548	non_blind	5	13160547	0	0	5.04993e-14
chr21	14332890	14332944	14332940	non_blind	3	13160548	0	0	5.04993e-14
chr21	14332980	14333250	14333246	non_blind	3	13160550	0	0	5.04993e-14
chr21	14333261	14333297	14333265	non_blind	5	13160553	0	0	5.04993e-14
chr21	14334089	14334202	14334198	non_blind	3	13160554	0	0	5.04993e-14
chr21	14334329	14334436	14334432	non_blind	3	13160556	0	0	5.04993e-14
chr21	14335113	14335258	14335117	non_blind	5	13160559	0	0	5.04993e-14
chr21	14335259	14335911	14335263	blind	5	13160561	0	0	5.04993e-14
chr21	14335259	14335911	14335907	blind	3	13160562	0	0	5.04993e-14
chr21	14335908	14336076	14335912	non_blind	5	13160563	0	0	5.04993e-14
chr21	14336341	14336453	14336449	non_blind	3	13160564	0	0	5.04993e-14
chr21	14336450	14336573	14336454	blind	5	13160565	0	0	5.04993e-14
chr21	14336450	14336573	14336569	blind	3	13160566	0	0	5.04993e-14
chr21	14336570	14336637	14336574	non_blind	5	13160567	0	0	5.04993e-14
chr21	14337139	14337193	14337189	non_blind	3	13160570	0	0	0.0220774
chr21	14337190	14337228	14337194	blind	5	13160571	0	0	0.0220774
chr21	14337190	14337228	14337224	blind	3	13160572	0	0	0.0220774
chr21	14337225	14337587	14337229	blind	5	13160573	0	0	0.0220774
chr21	14337225	14337587	14337583	blind	3	13160574	0	0	0.0220774
chr21	14337584	14337728	14337588	non_blind	5	13160575	0	0	0.0220774
chr21	14338428	14338587	14338432	blind	5	13160577	0	0	0.0220774
chr21	14338428	14338587	14338583	blind	3	13160578	0	0	0.0220774
chr21	14338584	14338769	14338588	blind	5	13160579	0	0	0.0220774
chr21	14338584	14338769	14338765	blind	3	13160580	0	0	0.0220774
chr21	14338766	14339001	14338770	blind	5	13160581	1	0.463626	0.0220774
chr21	14338766	14339001	14338997	blind	3	13160582	0	0	0.0220774
chr21	14339211	14339591	14339587	non_blind	3	13160586	0	0	0.0220774
chr21	14339614	14339715	14339711	non_blind	3	13160588	0	0	0.0220774
chr21	14339712	14339771	14339716	non_blind	5	13160589	0	0	0.0220774
chr21	14340594	14340843	14340598	non_blind	5	13160591	0	0	0.0220774
chr21	14341811	14341923	14341919	non_blind	3	13160592	0	0	0.0220774
chr21	14341920	14342068	14341924	blind	5	13160593	0	0	0.0220774
chr21	14341920	14342068	14342064	blind	3	13160594	0	0	0.0220774
chr21	14342065	14342360	14342069	non_blind	5	13160595	0	0	0.0220774
chr21	14344053	14344079	14344075	non_blind	3	13160602	0	0	0.0220774
chr21	14344076	14344180	14344080	non_blind	5	13160603	0	0	5.04993e-14
chr21	14344177	14344240	14344236	non_blind	3	13160604	0	0	5.04993e-14
chr21	14344237	14344286	14344241	blind	5	13160605	0	0	5.04993e-14
chr21	14344237	14344286	14344282	blind	3	13160606	0	0	5.04993e-14
chr21	14344283	14344689	14344287	non_blind	5	13160607	0	0	5.04993e-14
chr21	14344686	14344864	14344860	non_blind	3	13160608	0	0	5.04993e-14
chr21	14344861	14344937	14344865	non_blind	5	13160609	0	0	5.04993e-14
chr21	14344934	14345198	14345194	non_blind	3	13160610	0	0	5.04993e-14
chr21	14345195	14345220	14345199	non_blind	5	13160611	0	0	5.04993e-14
chr21	14345217	14345292	14345288	non_blind	3	13160612	0	0	5.04993e-14
chr21	14345289	14345532	14345293	non_blind	5	13160613	0	0	5.04993e-14
chr21	14346624	14346772	14346768	non_blind	3	13160616	0	0	5.04993e-14
chr21	14346769	14346915	14346773	non_blind	5	13160617	0	0	5.04993e-14
chr21	14347194	14347221	14347198	non_blind	5	13160619	0	0	5.04993e-14
chr21	14347431	14347544	14347540	non_blind	3	13160620	0	0	5.04993e-14
chr21	14347541	14347572	14347545	non_blind	5	13160621	0	0	5.04993e-14
chr21	14347569	14347719	14347715	non_blind	3	13160622	0	0	5.04993e-14
chr21	14347716	14347754	14347720	non_blind	5	13160623	0	0	5.04993e-14
chr21	14347751	14347868	14347864	non_blind	3	13160624	0	0	5.04993e-14
chr21	14348518	14348580	14348576	non_blind	3	13160626	0	0	5.04993e-14
chr21	14348577	14348810	14348581	non_blind	5	13160627	0	0	5.04993e-14
chr21	14349801	14349918	14349914	non_blind	3	13160628	0	0	5.04993e-14
chr21	14349915	14350158	14349919	non_blind	5	13160629	0	0	5.04993e-14
chr21	14350155	14350240	14350236	non_blind	3	13160630	0	0	5.04993e-14
chr21	14350425	14350541	14350537	non_blind	3	13160632	0	0	5.04993e-14
chr21	14350538	14350583	14350542	non_blind	5	13160633	0	0	5.04993e-14
chr21	14350593	14350623	14350619	non_blind	3	13160634	0	0	5.04993e-14
chr21	14350620	14350697	14350624	non_blind	5	13160635	0	0	5.04993e-14
chr21	14351685	14351851	14351847	non_blind	3	13160640	0	0	5.04993e-14
chr21	14351848	14351898	14351894	blind	3	13160642	0	0	5.04993e-14
chr21	14352239	14352436	14352432	non_blind	3	13160644	0	0	5.04993e-14
chr21	14352746	14352858	14352854	non_blind	3	13160646	0	0	5.04993e-14
chr21	14352855	14353011	14352859	non_blind	5	13160647	0	0	5.04993e-14
chr21	14353189	14353325	14353321	non_blind	3	13160648	0	0	5.04993e-14
chr21	14353322	14353369	14353326	non_blind	5	13160649	0	0	5.04993e-14
chr21	14355457	14356250	14355461	non_blind	5	13160657	0	0	5.04993e-14
chr21	14356247	14356339	14356335	non_blind	3	13160658	0	0	5.04993e-14
chr21	14356336	14356502	14356340	non_blind	5	13160659	0	0	5.04993e-14
chr21	14356565	14356613	14356609	non_blind	3	13160660	0	0	0.0441549
chr21	14356610	14356900	14356614	blind	5	13160661	0	0	0.0441549
chr21	14356610	14356900	14356896	blind	3	13160662	0	0	0.0441549
chr21	14356897	14356928	14356901	non_blind	5	13160663	0	0	0.0441549
chr21	14356925	14356971	14356967	non_blind	3	13160664	0	0	0.0441549
chr21	14356968	14357007	14356972	non_blind	5	13160665	0	0	0.0441549
chr21	14357004	14357123	14357119	non_blind	3	13160666	0	0	0.0441549
chr21	14357120	14357297	14357124	non_blind	5	13160667	0	0	0.0441549
chr21	14357294	14357824	14357820	non_blind	3	13160668	0	0	0.0441549
chr21	14357821	14357863	14357825	non_blind	5	13160669	0	0	0.0441549
chr21	14358542	14358874	14358870	non_blind	3	13160670	2	0.927252	0.0441549
chr21	14358871	14358900	14358875	blind	5	13160671	0	0	0.0441549
chr21	14358871	14358900	14358896	blind	3	13160672	0	0	0.17662
chr21	14358897	14359061	14358901	blind	5	13160673	0	0	0.17662
chr21	14358897	14359061	14359057	blind	3	13160674	0	0	0.17662
chr21	14359058	14359277	14359062	non_blind	5	13160675	0	0	0.17662
chr21	14359283	14359591	14359587	non_blind	3	13160676	0	0	0.17662
chr21	14359588	14359778	14359592	blind	5	13160677	0	0	0.17662
chr21	14359588	14359778	14359774	blind	3	13160678	0	0	0.17662
chr21	14360802	14360883	14360879	non_blind	3	13160682	0	0	0.17662
chr21	14360880	14361123	14360884	non_blind	5	13160683	0	0	0.17662
chr21	14361356	14361386	14361360	blind	5	13160685	0	0	0.132465
chr21	14361356	14361386	14361382	blind	3	13160686	6	2.78176	0.132465
chr21	14361383	14361433	14361387	blind	5	13160687	0	0	0.132465
chr21	14361383	14361433	14361429	blind	3	13160688	0	0	0.132465
chr21	14361430	14361478	14361434	non_blind	5	13160689	0	0	0.132465
chr21	14363181	14363395	14363391	blind	3	13160694	0	0	0.132465
chr21	14363392	14363420	14363396	blind	5	13160695	0	0	0.132465
chr21	14363392	14363420	14363416	blind	3	13160696	0	0	0.132465
chr21	14363417	14363456	14363421	non_blind	5	13160697	0	0	0.132465
chr21	14364893	14365274	14365270	non_blind	3	13160700	0	0	0.132465
chr21	14365271	14365369	14365275	non_blind	5	13160701	0	0	0.132465
chr21	14365564	14365851	14365847	non_blind	3	13160702	0	0	0.132465
chr21	14365852	14366032	14366028	non_blind	3	13160704	0	0	5.04993e-14
chr21	14366029	14366104	14366033	blind	5	13160705	0	0	5.04993e-14
chr21	14366029	14366104	14366100	blind	3	13160706	0	0	5.04993e-14
chr21	14366101	14366246	14366105	non_blind	5	13160707	0	0	5.04993e-14
chr21	14366938	14367093	14367089	non_blind	3	13160714	0	0	5.04993e-14
chr21	14367090	14367178	14367094	blind	5	13160715	0	0	5.04993e-14
chr21	14367090	14367178	14367174	blind	3	13160716	0	0	5.04993e-14
chr21	14367175	14367228	14367179	non_blind	5	13160717	0	0	5.04993e-14
chr21	14367225	14367508	14367504	non_blind	3	13160718	0	0	5.04993e-14
chr21	14367505	14367607	14367509	blind	5	13160719	0	0	5.04993e-14
chr21	14367505	14367607	14367603	blind	3	13160720	0	0	5.04993e-14
chr21	14367620	14367640	14367636	non_blind	3	13160722	0	0	5.04993e-14
chr21	14367637	14367717	14367641	blind	5	13160723	0	0	5.04993e-14
chr21	14367637	14367717	14367713	blind	3	13160724	0	0	5.04993e-14
chr21	14367714	14367847	14367718	non_blind	5	13160725	0	0	5.04993e-14
chr21	14368551	14368590	14368586	non_blind	3	13160726	0	0	5.04993e-14
chr21	14368587	14368623	14368591	non_blind	5	13160727	0	0	5.04993e-14
chr21	14370325	14370354	14370350	non_blind	3	13160732	0	0	5.04993e-14
chr21	14370351	14370401	14370355	blind	5	13160733	0	0	5.04993e-14
chr21	14370351	14370401	14370397	blind	3	13160734	0	0	5.04993e-14
chr21	14370398	14370534	14370402	blind	5	13160735	0	0	5.04993e-14
chr21	14370398	14370534	14370530	blind	3	13160736	0	0	5.04993e-14
chr21	14370531	14370871	14370535	non_blind	5	13160737	0	0	5.04993e-14
chr21	14371228	14371448	14371444	non_blind	3	13160738	0	0	5.04993e-14
chr21	14371445	14371661	14371449	non_blind	5	13160739	0	0	5.04993e-14
chr21	14371658	14371781	14371777	non_blind	3	13160740	0	0	5.04993e-14
chr21	14371778	14371890	14371782	non_blind	5	13160741	0	0	5.04993e-14
chr21	14371887	14372250	14372246	non_blind	3	13160742	0	0	5.04993e-14
chr21	14372247	14372696	14372251	non_blind	5	13160743	0	0	5.04993e-14
chr21	14373208	14373419	14373415	non_blind	3	13160744	0	0	5.04993e-14
chr21	14373416	14373440	14373420	blind	5	13160745	0	0	5.04993e-14
chr21	14373416	14373440	14373436	blind	3	13160746	0	0	5.04993e-14
chr21	14373437	14373577	14373441	blind	5	13160747	0	0	5.04993e-14
chr21	14373437	14373577	14373573	blind	3	13160748	0	0	5.04993e-14
chr21	14373574	14373760	14373578	blind	5	13160749	0	0	5.04993e-14
chr21	14373574	14373760	14373756	blind	3	13160750	0	0	5.04993e-14
chr21	14373757	14373794	14373761	blind	5	13160751	0	0	5.04993e-14
chr21	14373757	14373794	14373790	blind	3	13160752	0	0	5.04993e-14
chr21	14373791	14374223	14373795	blind	5	13160753	0	0	5.04993e-14
chr21	14373791	14374223	14374219	blind	3	13160754	0	0	5.04993e-14
chr21	14374220	14374399	14374224	non_blind	5	13160755	0	0	5.04993e-14
chr21	14374455	14375180	14375176	non_blind	3	13160756	0	0	5.04993e-14
chr21	14375177	14375238	14375181	non_blind	5	13160757	0	0	5.04993e-14
chr21	14375862	14375892	14375866	non_blind	5	13160763	0	0	5.04993e-14
chr21	14375961	14376191	14376187	non_blind	3	13160764	0	0	5.04993e-14
chr21	14376364	14376505	14376501	blind	3	13160770	0	0	5.04993e-14
chr21	14376502	14376633	14376506	blind	5	13160771	0	0	5.04993e-14
chr21	14376502	14376633	14376629	blind	3	13160772	0	0	5.04993e-14
chr21	14376630	14376782	14376634	non_blind	5	13160773	0	0	5.04993e-14
chr21	14376789	14376856	14376852	non_blind	3	13160774	0	0	5.04993e-14
chr21	14376853	14377240	14376857	non_blind	5	13160775	0	0	5.04993e-14
chr21	14377237	14377320	14377316	non_blind	3	13160776	0	0	5.04993e-14
chr21	14377317	14377401	14377321	non_blind	5	13160777	0	0	5.04993e-14
chr21	14377649	14378244	14378240	blind	3	13160780	0	0	5.04993e-14
chr21	14378241	14378498	14378245	non_blind	5	13160781	0	0	5.04993e-14
chr21	14379515	14379548	14379544	non_blind	3	13160786	0	0	5.04993e-14
chr21	14379545	14379834	14379549	non_blind	5	13160787	0	0	5.04993e-14
chr21	14380216	14380432	14380428	non_blind	3	13160790	0	0	5.04993e-14
chr21	14380429	14380804	14380433	non_blind	5	13160791	0	0	5.04993e-14
chr21	14380804	14380823	14380808	non_blind	5	13160793	0	0	5.04993e-14
chr21	14380967	14381045	14381041	non_blind	3	13160794	0	0	5.04993e-14
chr21	14381042	14381095	14381046	non_blind	5	13160795	0	0	5.04993e-14
chr21	14381359	14381460	14381456	non_blind	3	13160796	0	0	5.04993e-14
chr21	14381457	14381543	14381461	blind	5	13160797	0	0	5.04993e-14
chr21	14381457	14381543	14381539	blind	3	13160798	0	0	5.04993e-14
chr21	14381540	14381907	14381544	blind	5	13160799	0	0	5.04993e-14
chr21	14381540	14381907	14381903	blind	3	13160800	0	0	5.04993e-14
chr21	14381904	14382476	14381908	non_blind	5	13160801	0	0	5.04993e-14
chr21	14382473	14382710	14382706	non_blind	3	13160802	0	0	5.04993e-14
chr21	14382707	14383005	14382711	blind	5	13160803	0	0	5.04993e-14
chr21	14382707	14383005	14383001	blind	3	13160804	0	0	5.04993e-14
chr21	14383002	14383051	14383006	blind	5	13160805	0	0	5.04993e-14
chr21	14383002	14383051	14383047	blind	3	13160806	0	0	5.04993e-14
chr21	14383048	14383102	14383052	blind	5	13160807	0	0	5.04993e-14
chr21	14383048	14383102	14383098	blind	3	13160808	0	0	5.04993e-14
chr21	14383099	14383431	14383103	blind	5	13160809	0	0	5.04993e-14
chr21	14383099	14383431	14383427	blind	3	13160810	0	0	5.04993e-14
chr21	14383428	14383650	14383432	blind	5	13160811	0	0	5.04993e-14
chr21	14383428	14383650	14383646	blind	3	13160812	0	0	5.04993e-14
chr21	14383647	14383868	14383651	blind	5	13160813	0	0	5.04993e-14
chr21	14383647	14383868	14383864	blind	3	13160814	0	0	5.04993e-14
chr21	14383865	14384041	14383869	non_blind	5	13160815	0	0	5.04993e-14
chr21	14384038	14384161	14384157	non_blind	3	13160816	0	0	5.04993e-14
chr21	14384158	14384314	14384162	blind	5	13160817	0	0	5.04993e-14
chr21	14384158	14384314	14384310	blind	3	13160818	0	0	5.04993e-14
chr21	14384311	14384530	14384315	blind	5	13160819	0	0	5.04993e-14
chr21	14384311	14384530	14384526	blind	3	13160820	0	0	5.04993e-14
chr21	14384527	14384561	14384531	blind	5	13160821	0	0	5.04993e-14
chr21	14384527	14384561	14384557	blind	3	13160822	0	0	5.04993e-14
chr21	14384568	14384692	14384688	non_blind	3	13160824	0	0	5.04993e-14
chr21	14384689	14384729	14384693	blind	5	13160825	0	0	5.04993e-14
chr21	14384689	14384729	14384725	blind	3	13160826	0	0	5.04993e-14
chr21	14384726	14385177	14384730	non_blind	5	13160827	0	0	5.04993e-14
chr21	14386703	14386821	14386707	non_blind	5	13160829	0	0	5.04993e-14
chr21	14387418	14387616	14387612	non_blind	3	13160830	0	0	5.04993e-14
chr21	14387613	14387685	14387617	non_blind	5	13160831	0	0	5.04993e-14
chr21	14387682	14387903	14387899	non_blind	3	13160832	0	0	5.04993e-14
chr21	14387900	14387953	14387904	non_blind	5	13160833	0	0	5.04993e-14
chr21	14387950	14387972	14387968	non_blind	3	13160834	0	0	5.04993e-14
chr21	14387969	14387999	14387973	non_blind	5	13160835	0	0	1.72204
chr21	14388270	14388594	14388590	non_blind	3	13160836	0	0	1.72204
chr21	14388591	14388676	14388595	non_blind	5	13160837	0	0	1.72204
chr21	14389046	14389301	14389050	non_blind	5	13160839	0	0	1.72204
chr21	14390081	14390145	14390141	non_blind	3	13160840	0	0	1.72204
chr21	14390142	14390433	14390146	non_blind	5	13160841	0	0	1.81035
chr21	14390430	14390788	14390784	non_blind	3	13160842	0	0	1.81035
chr21	14390793	14390869	14390865	non_blind	3	13160844	0	0	1.81035
chr21	14390866	14391001	14390870	non_blind	5	13160845	0	0	1.81035
chr21	14391919	14391956	14391952	non_blind	3	13160850	0	0	1.81035
chr21	14391953	14392058	14391957	non_blind	5	13160851	78	36.1628	1.81035
chr21	14392907	14393180	14393176	non_blind	3	13160852	0	0	1.81035
chr21	14393177	14393234	14393181	non_blind	5	13160853	0	0	1.81035
chr21	14393399	14393571	14393567	non_blind	3	13160854	0	0	1.81035
chr21	14393568	14393626	14393572	non_blind	5	13160855	0	0	1.81035
chr21	14393979	14394025	14394021	non_blind	3	13160856	4	1.8545	1.81035
chr21	14394022	14394108	14394026	non_blind	5	13160857	0	0	1.81035
chr21	14394105	14394339	14394335	non_blind	3	13160858	0	0	1.81035
chr21	14394336	14394472	14394340	blind	5	13160859	0	0	1.81035
chr21	14394336	14394472	14394468	blind	3	13160860	0	0	1.81035
chr21	14394469	14394660	14394473	blind	5	13160861	0	0	1.81035
chr21	14394469	14394660	14394656	blind	3	13160862	0	0	0.264929
chr21	14394657	14395287	14394661	blind	5	13160863	0	0	0.264929
chr21	14394657	14395287	14395283	blind	3	13160864	0	0	0.264929
chr21	14395284	14395649	14395288	blind	5	13160865	0	0	0.264929
chr21	14395284	14395649	14395645	blind	3	13160866	0	0	0.264929
chr21	14395646	14395724	14395650	blind	5	13160867	0	0	0.17662
chr21	14395646	14395724	14395720	blind	3	13160868	0	0	0.17662
chr21	14395721	14395804	14395725	blind	5	13160869	0	0	0.17662
chr21	14395721	14395804	14395800	blind	3	13160870	0	0	0.17662
chr21	14395801	14395886	14395805	non_blind	5	13160871	0	0	0.17662
chr21	14397115	14397201	14397197	non_blind	3	13160872	8	3.70901	0.17662
chr21	14397198	14397306	14397202	non_blind	5	13160873	0	0	0.17662
chr21	14397860	14397968	14397964	non_blind	3	13160874	0	0	0.17662
chr21	14397965	14398019	14397969	blind	5	13160875	0	0	0.264929
chr21	14397965	14398019	14398015	blind	3	13160876	0	0	0.264929
chr21	14398016	14398052	14398020	non_blind	5	13160877	0	0	0.264929
chr21	14398544	14398628	14398624	non_blind	3	13160878	0	0	0.264929
chr21	14398625	14398797	14398629	non_blind	5	13160879	0	0	0.264929
chr21	14400036	14400057	14400053	non_blind	3	13160882	0	0	0.264929
chr21	14400054	14400132	14400058	non_blind	5	13160883	0	0	0.264929
chr21	14400129	14400213	14400209	non_blind	3	13160884	0	0	0.264929
chr21	14400210	14400274	14400214	blind	5	13160885	0	0	0.0883098
chr21	14400210	14400274	14400270	blind	3	13160886	0	0	0.0883098
chr21	14400271	14400298	14400275	non_blind	5	13160887	4	1.8545	0.0883098
chr21	14400295	14400490	14400486	non_blind	3	13160888	0	0	0.0883098
chr21	14400487	14400618	14400491	non_blind	5	13160889	0	0	0.0883098
chr21	14401164	14401273	14401269	non_blind	3	13160890	0	0	0.0883098
chr21	14401270	14401327	14401274	non_blind	5	13160891	0	0	0.0883098
chr21	14401324	14401429	14401425	non_blind	3	13160892	0	0	0.0883098
chr21	14401473	14401549	14401545	non_blind	3	13160894	0	0	0.0883098
chr21	14401546	14401792	14401550	blind	5	13160895	0	0	0.0883098
chr21	14401546	14401792	14401788	blind	3	13160896	0	0	0.110387
chr21	14401789	14401941	14401793	non_blind	5	13160897	0	0	0.110387
chr21	14401938	14402192	14402188	non_blind	3	13160898	0	0	0.110387
chr21	14402189	14402355	14402193	non_blind	5	13160899	0	0	0.0220774
chr21	14402754	14403011	14403007	non_blind	3	13160900	0	0	0.0220774
chr21	14403008	14403306	14403012	blind	5	13160901	0	0	0.0220774
chr21	14404209	14404371	14404367	non_blind	3	13160908	0	0	0.0220774
chr21	14404368	14404710	14404372	non_blind	5	13160909	0	0	0.0220774
chr21	14404707	14405134	14405130	non_blind	3	13160910	0	0	0.0220774
chr21	14405131	14405471	14405135	non_blind	5	13160911	0	0	0.0220774
chr21	14405468	14405541	14405537	non_blind	3	13160912	1	0.463626	0.0220774
chr21	14405538	14405746	14405542	non_blind	5	13160913	0	0	0.0220774
chr21	14405970	14406027	14406023	non_blind	3	13160914	0	0	0.0220774
chr21	14406252	14406456	14406452	non_blind	3	13160920	0	0	0.0220774
chr21	14406463	14406695	14406467	non_blind	5	13160923	0	0	0.0220774
chr21	14409094	14409508	14409504	non_blind	3	13160932	0	0	0.0220774
chr21	14409505	14409703	14409509	non_blind	5	13160933	0	0	0.0220774
chr21	14411835	14411939	14411839	blind	5	13160939	0	0	0.0220774
chr21	14411939	14412064	14412060	non_blind	3	13160942	0	0	0.0220774
chr21	14412061	14412120	14412065	non_blind	5	13160943	0	0	0.0220774
chr21	14412117	14412150	14412146	non_blind	3	13160944	0	0	0.0220774
chr21	14412147	14412203	14412151	non_blind	5	13160945	0	0	5.05839e-14
chr21	14412200	14412292	14412288	non_blind	3	13160946	0	0	0.132465
chr21	14412289	14412474	14412293	non_blind	5	13160947	0	0	0.132465
chr21	14412737	14412933	14412929	non_blind	3	13160950	0	0	0.132465
chr21	14412930	14413146	14412934	blind	5	13160951	0	0	0.132465
chr21	14412930	14413146	14413142	blind	3	13160952	0	0	0.132465
chr21	14413143	14413214	14413147	non_blind	5	13160953	0	0	0.132465
chr21	14413211	14413303	14413299	non_blind	3	13160954	0	0	0.132465
chr21	14413300	14413443	14413304	non_blind	5	13160955	0	0	0.132465
chr21	14414334	14414502	14414498	non_blind	3	13160958	0	0	0.132465
chr21	14414499	14414518	14414503	non_blind	5	13160959	0	0	0.132465
chr21	14414661	14414802	14414798	non_blind	3	13160960	6	2.78176	0.132465
chr21	14414799	14414833	14414803	non_blind	5	13160961	0	0	0.132465
chr21	14414830	14414932	14414928	non_blind	3	13160962	0	0	0.132465
chr21	14414936	14415291	14414940	non_blind	5	13160965	0	0	0.132465
chr21	14415288	14415782	14415778	non_blind	3	13160966	0	0	0.132465
chr21	14415779	14416010	14415783	non_blind	5	13160967	0	0	0.132465
chr21	14416181	14416205	14416201	non_blind	3	13160968	0	0	0.132465
chr21	14416202	14416312	14416206	non_blind	5	13160969	0	0	0.132465
chr21	14417683	14417809	14417805	non_blind	3	13160970	0	0	0.132465
chr21	14417806	14418397	14417810	non_blind	5	13160971	0	0	0.132465
chr21	14419358	14419505	14419501	non_blind	3	13160972	0	0	0.132465
chr21	14420782	14420885	14420786	blind	5	13160975	0	0	5.05839e-14
chr21	14420782	14420885	14420881	blind	3	13160976	0	0	5.05839e-14
chr21	14420882	14420996	14420886	blind	5	13160977	0	0	5.05839e-14
chr21	14420882	14420996	14420992	blind	3	13160978	0	0	5.05839e-14
chr21	14420993	14421291	14420997	blind	5	13160979	0	0	5.05839e-14
chr21	14420993	14421291	14421287	blind	3	13160980	0	0	5.05839e-14
chr21	14422878	14422994	14422882	non_blind	5	13160987	0	0	5.05839e-14
chr21	14422991	14423098	14423094	non_blind	3	13160988	0	0	5.05839e-14
chr21	14423102	14423219	14423215	non_blind	3	13160990	0	0	5.05839e-14
chr21	14423437	14423509	14423441	blind	5	13160997	0	0	5.05839e-14
chr21	14423437	14423509	14423505	blind	3	13160998	0	0	5.05839e-14
chr21	14424048	14424073	14424052	blind	5	13161003	0	0	5.05839e-14
chr21	14424048	14424073	14424069	blind	3	13161004	0	0	5.05839e-14
chr21	14424070	14424144	14424074	blind	5	13161005	0	0	5.05839e-14
chr21	14424876	14425030	14424880	blind	5	13161013	0	0	5.05839e-14
chr21	14427392	14427535	14427531	non_blind	3	13161016	0	0	5.05839e-14
chr21	14427532	14427752	14427536	non_blind	5	13161017	0	0	5.05839e-14
chr21	14428288	14428364	14428292	blind	5	13161019	0	0	0.154542
chr21	14428288	14428364	14428360	blind	3	13161020	0	0	0.154542
chr21	14428916	14428953	14428920	non_blind	5	13161025	0	0	0.154542
chr21	14430532	14430668	14430536	blind	5	13161031	0	0	0.154542
chr21	14430532	14430668	14430664	blind	3	13161032	0	0	0.154542
chr21	14430665	14430825	14430669	non_blind	5	13161033	0	0	0.154542
chr21	14431074	14431154	14431150	non_blind	3	13161034	0	0	0.154542
chr21	14431151	14432331	14431155	non_blind	5	13161035	0	0	0.154542
chr21	14432875	14433400	14433396	non_blind	3	13161036	0	0	0.154542
chr21	14433397	14433497	14433401	non_blind	5	13161037	0	0	0.154542
chr21	14433494	14433522	14433518	non_blind	3	13161038	7	3.24538	0.154542
chr21	14433519	14433642	14433523	non_blind	5	13161039	0	0	0.154542
chr21	14434275	14434350	14434346	non_blind	3	13161040	0	0	0.154542
chr21	14434347	14434599	14434351	non_blind	5	13161041	0	0	0.154542
chr21	14435022	14435219	14435215	blind	3	13161044	0	0	0.154542
chr21	14435216	14435461	14435220	non_blind	5	13161045	0	0	0.154542
chr21	14435862	14436010	14436006	non_blind	3	13161046	0	0	0.154542
chr21	14436007	14436085	14436011	non_blind	5	13161047	0	0	0.154542
chr21	14436190	14436383	14436379	non_blind	3	13161048	0	0	0.154542
chr21	14436380	14436697	14436384	blind	5	13161049	0	0	0.154542
chr21	14436890	14437017	14436894	non_blind	5	13161053	0	0	0.154542
chr21	14437178	14437338	14437334	non_blind	3	13161054	0	0	5.05839e-14
chr21	14437335	14437553	14437339	non_blind	5	13161055	0	0	5.05839e-14
chr21	14437631	14437676	14437635	blind	5	13161057	0	0	5.05839e-14
chr21	14437631	14437676	14437672	blind	3	13161058	0	0	5.05839e-14
chr21	14437673	14437884	14437677	blind	5	13161059	0	0	5.05839e-14
chr21	14437673	14437884	14437880	blind	3	13161060	0	0	5.05839e-14
chr21	14438767	14438917	14438913	non_blind	3	13161062	0	0	5.05839e-14
chr21	14438914	14439135	14438918	blind	5	13161063	0	0	5.05839e-14
chr21	14438914	14439135	14439131	blind	3	13161064	0	0	5.05839e-14
chr21	14439132	14439187	14439136	non_blind	5	13161065	0	0	5.05839e-14
chr21	14439524	14439575	14439571	non_blind	3	13161072	0	0	5.05839e-14
chr21	14439572	14439611	14439576	blind	5	13161073	0	0	5.05839e-14
chr21	14439572	14439611	14439607	blind	3	13161074	0	0	5.05839e-14
chr21	14439608	14439764	14439612	blind	5	13161075	0	0	5.05839e-14
chr21	14439608	14439764	14439760	blind	3	13161076	0	0	0.132465
chr21	14439761	14440314	14439765	non_blind	5	13161077	0	0	0.132465
chr21	14440698	14440875	14440871	blind	3	13161080	0	0	0.132465
chr21	14440872	14440917	14440876	non_blind	5	13161081	0	0	0.132465
chr21	14442127	14442150	14442146	non_blind	3	13161082	0	0	0.132465
chr21	14442147	14442530	14442151	blind	5	13161083	0	0	0.132465
chr21	14442147	14442530	14442526	blind	3	13161084	0	0	0.132465
chr21	14442527	14442647	14442531	non_blind	5	13161085	0	0	0.132465
chr21	14443687	14443712	14443708	non_blind	3	13161086	0	0	0.132465
chr21	14443709	14444281	14443713	non_blind	5	13161087	0	0	0.132465
chr21	14444912	14444932	14444928	non_blind	3	13161088	6	2.78176	0.132465
chr21	14444929	14445195	14444933	non_blind	5	13161089	0	0	0.132465
chr21	14445374	14445857	14445853	non_blind	3	13161090	0	0	0.132465
chr21	14445854	14446008	14445858	blind	5	13161091	0	0	0.132465
chr21	14445854	14446008	14446004	blind	3	13161092	0	0	0.132465
chr21	14446005	14446073	14446009	blind	5	13161093	0	0	0.132465
chr21	14446005	14446073	14446069	blind	3	13161094	0	0	0.132465
chr21	14446070	14446135	14446074	blind	5	13161095	0	0	0.132465
chr21	14446070	14446135	14446131	blind	3	13161096	0	0	0.132465
chr21	14446132	14446200	14446136	non_blind	5	13161097	0	0	0.132465
chr21	14446197	14446241	14446237	non_blind	3	13161098	0	0	0.132465
chr21	14446529	14446593	14446589	non_blind	3	13161100	0	0	5.05839e-14
chr21	14446605	14446675	14446609	blind	5	13161105	0	0	5.05839e-14
chr21	14446605	14446675	14446671	blind	3	13161106	0	0	5.05839e-14
chr21	14446672	14446740	14446676	non_blind	5	13161107	0	0	5.05839e-14
chr21	14447737	14448038	14448034	non_blind	3	13161108	0	0	5.05839e-14
chr21	14448035	14448112	14448108	blind	3	13161110	0	0	5.05839e-14
chr21	14448194	14448705	14448701	non_blind	3	13161112	0	0	5.05839e-14
chr21	14448702	14448913	14448706	blind	5	13161113	0	0	5.05839e-14
chr21	14448702	14448913	14448909	blind	3	13161114	0	0	5.05839e-14
chr21	14448910	14449118	14448914	non_blind	5	13161115	0	0	5.05839e-14
chr21	14450146	14450185	14450181	non_blind	3	13161120	0	0	5.05839e-14
chr21	14450182	14450604	14450186	non_blind	5	13161121	0	0	5.05839e-14
chr21	14450708	14450755	14450751	non_blind	3	13161122	0	0	5.05839e-14
chr21	14450752	14450866	14450756	non_blind	5	13161123	0	0	5.05839e-14
chr21	14450863	14451008	14451004	non_blind	3	13161124	0	0	5.05839e-14
chr21	14451005	14451126	14451009	non_blind	5	13161125	0	0	5.05839e-14
chr21	14452424	14452464	14452460	non_blind	3	13161126	0	0	5.05839e-14
chr21	14452470	14452617	14452474	blind	5	13161129	0	0	5.05839e-14
chr21	14452470	14452617	14452613	blind	3	13161130	0	0	5.05839e-14
chr21	14452614	14452722	14452618	blind	5	13161131	0	0	5.05839e-14
chr21	14452614	14452722	14452718	blind	3	13161132	0	0	5.05839e-14
chr21	14452719	14452799	14452723	blind	5	13161133	0	0	5.05839e-14
chr21	14452719	14452799	14452795	blind	3	13161134	0	0	5.05839e-14
chr21	14452796	14452836	14452800	non_blind	5	13161135	0	0	5.05839e-14
chr21	14453033	14453245	14453241	non_blind	3	13161136	0	0	5.05839e-14
chr21	14453242	14453500	14453246	non_blind	5	13161137	0	0	5.05839e-14
chr21	14454517	14454552	14454548	non_blind	3	13161138	0	0	5.05839e-14
chr21	14454549	14454649	14454553	non_blind	5	13161139	0	0	5.05839e-14
chr21	14454646	14454728	14454724	non_blind	3	13161140	0	0	5.05839e-14
chr21	14454725	14454876	14454729	blind	5	13161141	0	0	5.05839e-14
chr21	14454725	14454876	14454872	blind	3	13161142	0	0	5.05839e-14
chr21	14454873	14455068	14454877	non_blind	5	13161143	0	0	5.05839e-14
chr21	14455340	14455373	14455369	non_blind	3	13161144	0	0	5.05839e-14
chr21	14455370	14455473	14455374	blind	5	13161145	0	0	5.05839e-14
chr21	14455370	14455473	14455469	blind	3	13161146	0	0	5.05839e-14
chr21	14455470	14455519	14455474	non_blind	5	13161147	0	0	5.05839e-14
chr21	14455599	14455827	14455823	non_blind	3	13161148	0	0	5.05839e-14
chr21	14455824	14455874	14455828	non_blind	5	13161149	0	0	5.05839e-14
chr21	14456667	14456824	14456820	non_blind	3	13161150	0	0	5.05839e-14
chr21	14456833	14456857	14456837	blind	5	13161153	0	0	5.05839e-14
chr21	14456833	14456857	14456853	blind	3	13161154	0	0	5.05839e-14
chr21	14456854	14456903	14456858	non_blind	5	13161155	0	0	5.05839e-14
chr21	14457003	14457129	14457125	non_blind	3	13161156	0	0	5.05839e-14
chr21	14457126	14457237	14457130	non_blind	5	13161157	0	0	5.05839e-14
chr21	14457495	14457851	14457847	non_blind	3	13161158	0	0	5.05839e-14
chr21	14457848	14457887	14457852	non_blind	5	13161159	0	0	5.05839e-14
chr21	14458785	14458966	14458962	non_blind	3	13161160	0	0	5.05839e-14
chr21	14458963	14459752	14458967	non_blind	5	13161161	0	0	5.05839e-14
chr21	14459812	14459904	14459900	non_blind	3	13161162	0	0	5.05839e-14
chr21	14459901	14459961	14459905	non_blind	5	13161163	0	0	5.05839e-14
chr21	14460012	14460176	14460172	non_blind	3	13161164	0	0	5.05839e-14
chr21	14460173	14460192	14460177	blind	5	13161165	0	0	5.05839e-14
chr21	14460173	14460192	14460188	blind	3	13161166	0	0	5.05839e-14
chr21	14460189	14460587	14460193	non_blind	5	13161167	0	0	5.05839e-14
chr21	14460598	14461019	14460602	non_blind	5	13161169	0	0	5.05839e-14
chr21	14461016	14461072	14461068	non_blind	3	13161170	0	0	5.05839e-14
chr21	14461069	14461102	14461073	non_blind	5	13161171	0	0	5.05839e-14
chr21	14461107	14461265	14461261	non_blind	3	13161172	0	0	5.05839e-14
chr21	14461262	14461327	14461266	blind	5	13161173	0	0	5.05839e-14
chr21	14461262	14461327	14461323	blind	3	13161174	0	0	5.05839e-14
chr21	14461324	14461596	14461328	non_blind	5	13161175	0	0	5.05839e-14
chr21	14462164	14462486	14462482	non_blind	3	13161176	0	0	5.05839e-14
chr21	14462483	14462566	14462562	blind	3	13161178	0	0	5.05839e-14
chr21	14462563	14462970	14462567	blind	5	13161179	0	0	5.05839e-14
chr21	14462563	14462970	14462966	blind	3	13161180	0	0	5.05839e-14
chr21	14462967	14463113	14462971	non_blind	5	13161181	0	0	5.05839e-14
chr21	14463110	14463341	14463337	non_blind	3	13161182	0	0	5.05839e-14
chr21	14463338	14463359	14463342	non_blind	5	13161183	0	0	5.05839e-14
chr21	14463541	14464166	14464162	non_blind	3	13161184	0	0	5.05839e-14
chr21	14464163	14464744	14464167	non_blind	5	13161185	0	0	5.05839e-14
chr21	14464741	14464815	14464811	non_blind	3	13161186	0	0	5.05839e-14
chr21	14464812	14464978	14464816	non_blind	5	13161187	0	0	5.05839e-14
chr21	14465705	14465749	14465709	non_blind	5	13161191	0	0	5.05839e-14
chr21	14465777	14465938	14465934	non_blind	3	13161192	0	0	5.05839e-14
chr21	14465935	14466002	14465939	non_blind	5	13161193	0	0	5.05839e-14
chr21	14466250	14466387	14466254	non_blind	5	13161195	0	0	5.05839e-14
chr21	14466384	14466410	14466406	non_blind	3	13161196	0	0	5.05839e-14
chr21	14466407	14466671	14466411	blind	5	13161197	0	0	5.05839e-14
chr21	14466407	14466671	14466667	blind	3	13161198	0	0	5.05839e-14
chr21	14466668	14466715	14466672	non_blind	5	13161199	0	0	5.05839e-14
chr21	14467063	14467138	14467134	non_blind	3	13161200	0	0	5.05839e-14
chr21	14467135	14467339	14467139	non_blind	5	13161201	0	0	5.05839e-14
chr21	14467336	14467384	14467380	non_blind	3	13161202	0	0	5.05839e-14
chr21	14467381	14467778	14467385	non_blind	5	13161203	0	0	5.05839e-14
chr21	14468392	14468688	14468684	non_blind	3	13161204	0	0	5.05839e-14
chr21	14468685	14469286	14468689	non_blind	5	13161205	0	0	5.05839e-14
chr21	14469574	14469628	14469624	non_blind	3	13161206	0	0	5.05839e-14
chr21	14469625	14469675	14469629	blind	5	13161207	0	0	5.05839e-14
chr21	14469625	14469675	14469671	blind	3	13161208	0	0	5.05839e-14
chr21	14469672	14469893	14469676	blind	5	13161209	0	0	5.05839e-14
chr21	14469672	14469893	14469889	blind	3	13161210	0	0	5.05839e-14
chr21	14469897	14469981	14469977	non_blind	3	13161212	0	0	5.05839e-14
chr21	14469978	14469996	14469982	blind	5	13161213	0	0	5.05839e-14
chr21	14469978	14469996	14469992	blind	3	13161214	0	0	5.05839e-14
chr21	14469993	14470024	14469997	non_blind	5	13161215	0	0	5.05839e-14
chr21	14470021	14470222	14470218	non_blind	3	13161216	0	0	5.05839e-14
chr21	14470241	14470488	14470484	non_blind	3	13161218	0	0	5.05839e-14
chr21	14470485	14470566	14470489	non_blind	5	13161219	0	0	5.05839e-14
chr21	14470563	14470601	14470597	non_blind	3	13161220	0	0	5.05839e-14
chr21	14470598	14470648	14470602	non_blind	5	13161221	0	0	5.05839e-14
chr21	14471867	14472046	14472042	non_blind	3	13161222	0	0	5.05839e-14
chr21	14472043	14472264	14472047	non_blind	5	13161223	0	0	5.05839e-14
chr21	14472261	14472442	14472438	non_blind	3	13161224	0	0	5.05839e-14
chr21	14472439	14472768	14472443	non_blind	5	13161225	0	0	5.05839e-14
chr21	14472765	14472933	14472929	non_blind	3	13161226	0	0	5.05839e-14
chr21	14472930	14472980	14472934	non_blind	5	13161227	0	0	5.05839e-14
chr21	14472980	14473029	14472984	non_blind	5	13161229	0	0	5.05839e-14
chr21	14473026	14473179	14473175	non_blind	3	13161230	0	0	5.05839e-14
chr21	14473176	14473195	14473180	blind	5	13161231	0	0	5.05839e-14
chr21	14473176	14473195	14473191	blind	3	13161232	0	0	5.05839e-14
chr21	14473192	14473321	14473196	blind	5	13161233	0	0	5.05839e-14
chr21	14473192	14473321	14473317	blind	3	13161234	0	0	5.05839e-14
chr21	14473318	14474017	14473322	non_blind	5	13161235	0	0	5.05839e-14
chr21	14474214	14474302	14474298	non_blind	3	13161236	0	0	5.05839e-14
chr21	14474299	14474374	14474303	non_blind	5	13161237	0	0	5.05839e-14
chr21	14474415	14474553	14474549	non_blind	3	13161238	0	0	5.05839e-14
chr21	14474550	14474691	14474554	blind	5	13161239	0	0	5.05839e-14
chr21	14474550	14474691	14474687	blind	3	13161240	0	0	5.05839e-14
chr21	14474688	14474758	14474692	non_blind	5	13161241	0	0	5.05839e-14
chr21	14474848	14475303	14475299	non_blind	3	13161242	0	0	5.05839e-14
chr21	14475300	14475915	14475304	blind	5	13161243	0	0	5.05839e-14
chr21	14476089	14476593	14476589	non_blind	3	13161248	0	0	5.05839e-14
chr21	14476590	14476870	14476594	blind	5	13161249	0	0	5.05839e-14
chr21	14476590	14476870	14476866	blind	3	13161250	0	0	5.05839e-14
chr21	14476867	14476913	14476871	non_blind	5	13161251	0	0	5.05839e-14
chr21	14477657	14477678	14477674	non_blind	3	13161252	0	0	5.05839e-14
chr21	14479264	14479452	14479268	blind	5	13161257	0	0	5.05839e-14
chr21	14479264	14479452	14479448	blind	3	13161258	0	0	5.05839e-14
chr21	14479449	14479496	14479453	non_blind	5	13161259	0	0	5.05839e-14
chr21	14479493	14479559	14479555	non_blind	3	13161260	0	0	5.05839e-14
chr21	14479556	14479831	14479560	non_blind	5	13161261	0	0	5.05839e-14
chr21	14480018	14480076	14480072	non_blind	3	13161264	0	0	5.05839e-14
chr21	14480073	14480413	14480077	non_blind	5	13161265	0	0	5.05839e-14
chr21	14480410	14480575	14480571	non_blind	3	13161266	0	0	5.05839e-14
chr21	14480572	14480749	14480576	blind	5	13161267	0	0	5.05839e-14
chr21	14480572	14480749	14480745	blind	3	13161268	0	0	5.05839e-14
chr21	14480746	14480888	14480750	non_blind	5	13161269	0	0	5.05839e-14
chr21	14482074	14482117	14482078	blind	5	13161273	0	0	5.05839e-14
chr21	14482074	14482117	14482113	blind	3	13161274	0	0	5.05839e-14
chr21	14482114	14482447	14482118	non_blind	5	13161275	0	0	5.05839e-14
chr21	14482444	14482698	14482694	non_blind	3	13161276	0	0	5.05839e-14
chr21	14482695	14482772	14482699	non_blind	5	13161277	0	0	5.05839e-14
chr21	14482769	14482823	14482819	non_blind	3	13161278	0	0	5.05839e-14
chr21	14482820	14482845	14482824	blind	5	13161279	0	0	0.0220774
chr21	14482820	14482845	14482841	blind	3	13161280	0	0	0.0220774
chr21	14482842	14482905	14482846	non_blind	5	13161281	0	0	0.0220774
chr21	14483052	14483109	14483056	non_blind	5	13161283	0	0	0.0220774
chr21	14483213	14483297	14483293	non_blind	3	13161284	0	0	0.0220774
chr21	14483294	14483427	14483298	non_blind	5	13161285	0	0	0.0220774
chr21	14483581	14483680	14483676	non_blind	3	13161286	0	0	0.0220774
chr21	14483677	14483718	14483681	non_blind	5	13161287	0	0	0.0220774
chr21	14483867	14484085	14484081	non_blind	3	13161288	0	0	0.0220774
chr21	14484082	14484363	14484086	non_blind	5	13161289	0	0	0.0220774
chr21	14484793	14484817	14484797	non_blind	5	13161293	1	0.463626	0.0220774
chr21	14484834	14484866	14484862	non_blind	3	13161294	0	0	0.0220774
chr21	14484863	14485431	14484867	blind	5	13161295	0	0	0.0220774
chr21	14484863	14485431	14485427	blind	3	13161296	0	0	0.0220774
chr21	14485428	14485951	14485432	non_blind	5	13161297	0	0	0.0220774
chr21	14485948	14485977	14485973	non_blind	3	13161298	0	0	0.0220774
chr21	14485974	14486171	14485978	non_blind	5	13161299	0	0	0.0220774
chr21	14486362	14486390	14486386	non_blind	3	13161300	0	0	0.0220774
chr21	14486387	14486541	14486391	blind	5	13161301	0	0	0.0220774
chr21	14486387	14486541	14486537	blind	3	13161302	0	0	0.0220774
chr21	14486538	14486565	14486542	non_blind	5	13161303	0	0	0.0220774
chr21	14486988	14487050	14487046	non_blind	3	13161304	0	0	5.05839e-14
chr21	14487047	14487421	14487051	blind	5	13161305	0	0	5.05839e-14
chr21	14487047	14487421	14487417	blind	3	13161306	0	0	5.05839e-14
chr21	14487418	14487546	14487422	non_blind	5	13161307	0	0	5.05839e-14
chr21	14487915	14488194	14488190	non_blind	3	13161308	0	0	5.05839e-14
chr21	14488191	14488307	14488195	blind	5	13161309	0	0	5.05839e-14
chr21	14488191	14488307	14488303	blind	3	13161310	0	0	5.05839e-14
chr21	14488304	14488629	14488308	non_blind	5	13161311	0	0	5.05839e-14
chr21	14488643	14488877	14488873	non_blind	3	13161312	0	0	5.05839e-14
chr21	14488874	14488974	14488878	blind	5	13161313	0	0	5.05839e-14
chr21	14488874	14488974	14488970	blind	3	13161314	0	0	5.05839e-14
chr21	14488971	14489130	14488975	non_blind	5	13161315	0	0	5.05839e-14
chr21	14489788	14489975	14489971	non_blind	3	13161316	0	0	5.05839e-14
chr21	14489972	14490546	14489976	non_blind	5	13161317	0	0	5.05839e-14
chr21	14490744	14490919	14490915	non_blind	3	13161318	0	0	5.05839e-14
chr21	14490916	14491156	14490920	non_blind	5	13161319	0	0	5.05839e-14
chr21	14491716	14491924	14491920	non_blind	3	13161320	0	0	5.05839e-14
chr21	14491921	14492270	14491925	non_blind	5	13161321	0	0	5.05839e-14
chr21	14492271	14492322	14492318	non_blind	3	13161322	0	0	5.05839e-14
chr21	14492319	14492412	14492323	blind	5	13161323	0	0	5.05839e-14
chr21	14492319	14492412	14492408	blind	3	13161324	0	0	5.05839e-14
chr21	14492409	14492499	14492413	non_blind	5	13161325	0	0	5.05839e-14
chr21	14492967	14493724	14493720	non_blind	3	13161326	0	0	5.05839e-14
chr21	14493721	14493932	14493725	blind	5	13161327	0	0	5.05839e-14
chr21	14493721	14493932	14493928	blind	3	13161328	0	0	5.05839e-14
chr21	14493929	14494040	14493933	blind	5	13161329	0	0	5.05839e-14
chr21	14494971	14495070	14495066	non_blind	3	13161336	0	0	5.05839e-14
chr21	14495067	14495110	14495071	non_blind	5	13161337	0	0	5.05839e-14
chr21	14496468	14496649	14496645	non_blind	3	13161338	0	0	5.05839e-14
chr21	14496646	14497374	14496650	blind	5	13161339	0	0	5.05839e-14
chr21	14497543	14497994	14497547	non_blind	5	13161345	0	0	5.05839e-14
chr21	14498344	14498685	14498348	non_blind	5	13161347	0	0	5.05839e-14
chr21	14498846	14498870	14498866	non_blind	3	13161348	0	0	5.05839e-14
chr21	14499220	14500066	14500062	non_blind	3	13161350	0	0	5.05839e-14
chr21	14500063	14500133	14500067	blind	5	13161351	0	0	5.05839e-14
chr21	14500063	14500133	14500129	blind	3	13161352	0	0	5.05839e-14
chr21	14500130	14500466	14500134	blind	5	13161353	0	0	5.05839e-14
chr21	14500130	14500466	14500462	blind	3	13161354	0	0	5.05839e-14
chr21	14500463	14500494	14500467	non_blind	5	13161355	0	0	5.05839e-14
chr21	14501132	14501231	14501136	non_blind	5	13161359	0	0	5.05839e-14
chr21	14502194	14502225	14502221	non_blind	3	13161360	0	0	5.05839e-14
chr21	14502222	14502249	14502226	blind	5	13161361	0	0	5.05839e-14
chr21	14502222	14502249	14502245	blind	3	13161362	0	0	5.05839e-14
chr21	14502246	14502356	14502250	non_blind	5	13161363	0	0	5.05839e-14
chr21	14502525	14502744	14502740	non_blind	3	13161364	0	0	5.05839e-14
chr21	14502741	14502830	14502745	non_blind	5	13161365	0	0	5.05839e-14
chr21	14502836	14503110	14502840	non_blind	5	13161367	0	0	5.05839e-14
chr21	14503107	14503150	14503146	non_blind	3	13161368	0	0	5.05839e-14
chr21	14503147	14503231	14503151	blind	5	13161369	0	0	5.05839e-14
chr21	14503147	14503231	14503227	blind	3	13161370	0	0	5.05839e-14
chr21	14503228	14503458	14503232	blind	5	13161371	0	0	5.05839e-14
chr21	14503228	14503458	14503454	blind	3	13161372	0	0	5.05839e-14
chr21	14503455	14503699	14503459	non_blind	5	13161373	0	0	5.05839e-14
chr21	14503762	14503828	14503824	non_blind	3	13161374	0	0	5.05839e-14
chr21	14503825	14504083	14503829	non_blind	5	13161375	0	0	5.05839e-14
chr21	14504179	14504359	14504355	non_blind	3	13161376	0	0	5.05839e-14
chr21	14504720	14505226	14504724	non_blind	5	13161379	0	0	5.05839e-14
chr21	14506391	14506424	14506395	non_blind	5	13161385	0	0	5.05839e-14
chr21	14508023	14508087	14508027	blind	5	13161395	0	0	5.05839e-14
chr21	14509916	14510255	14510251	blind	3	13161404	0	0	5.05839e-14
chr21	14510252	14510492	14510256	non_blind	5	13161405	0	0	5.05839e-14
chr21	14510489	14510732	14510728	non_blind	3	13161406	0	0	5.05839e-14
chr21	14510729	14510930	14510733	non_blind	5	13161407	0	0	5.05839e-14
chr21	14510927	14511003	14510999	non_blind	3	13161408	0	0	5.05839e-14
chr21	14511000	14511186	14511004	non_blind	5	13161409	0	0	5.05839e-14
chr21	14511335	14511453	14511449	non_blind	3	13161410	0	0	5.05839e-14
chr21	14511465	14511832	14511828	non_blind	3	13161412	0	0	5.05839e-14
chr21	14511829	14511919	14511833	blind	5	13161413	0	0	5.05839e-14
chr21	14511829	14511919	14511915	blind	3	13161414	0	0	5.05839e-14
chr21	14511916	14512419	14511920	blind	5	13161415	0	0	5.05839e-14
chr21	14511916	14512419	14512415	blind	3	13161416	0	0	5.05839e-14
chr21	14512416	14512478	14512420	non_blind	5	13161417	0	0	5.05839e-14
chr21	14512915	14512963	14512959	non_blind	3	13161418	0	0	5.05839e-14
chr21	14512965	14513001	14512969	non_blind	5	13161421	0	0	5.05839e-14
chr21	14512998	14513026	14513022	non_blind	3	13161422	0	0	5.05839e-14
chr21	14513023	14513047	14513027	non_blind	5	13161423	0	0	5.05839e-14
chr21	14513947	14513969	14513965	non_blind	3	13161424	0	0	5.05839e-14
chr21	14513966	14514049	14513970	non_blind	5	13161425	0	0	5.05839e-14
chr21	14514046	14514333	14514329	non_blind	3	13161426	0	0	5.05839e-14
chr21	14514330	14514391	14514334	non_blind	5	13161427	0	0	5.05839e-14
chr21	14514546	14514706	14514702	non_blind	3	13161428	0	0	5.05839e-14
chr21	14514703	14514918	14514707	non_blind	5	13161429	0	0	0.110387
chr21	14515057	14515328	14515324	non_blind	3	13161430	0	0	0.110387
chr21	14515325	14515448	14515329	non_blind	5	13161431	0	0	0.110387
chr21	14516117	14516267	14516263	non_blind	3	13161432	0	0	0.110387
chr21	14516264	14516344	14516268	non_blind	5	13161433	0	0	0.110387
chr21	14516386	14516549	14516390	non_blind	5	13161435	0	0	0.110387
chr21	14516630	14516698	14516634	non_blind	5	13161437	0	0	0.110387
chr21	14516698	14516950	14516702	non_blind	5	13161439	0	0	0.110387
chr21	14516947	14517029	14517025	non_blind	3	13161440	0	0	0.110387
chr21	14517035	14517097	14517093	non_blind	3	13161442	0	0	0.110387
chr21	14517094	14517144	14517098	non_blind	5	13161443	5	2.31813	0.110387
chr21	14517661	14517918	14517914	non_blind	3	13161444	0	0	0.110387
chr21	14517915	14517939	14517919	blind	5	13161445	0	0	0.110387
chr21	14517915	14517939	14517935	blind	3	13161446	0	0	0.110387
chr21	14517936	14518052	14517940	non_blind	5	13161447	0	0	0.110387
chr21	14518168	14518204	14518200	non_blind	3	13161448	0	0	0.110387
chr21	14518201	14518328	14518205	non_blind	5	13161449	0	0	0.110387
chr21	14519357	14519661	14519657	non_blind	3	13161450	0	0	0.110387
chr21	14519658	14519725	14519662	blind	5	13161451	0	0	0.110387
chr21	14519658	14519725	14519721	blind	3	13161452	0	0	0.154542
chr21	14519754	14520507	14519758	non_blind	5	13161457	0	0	0.154542
chr21	14520670	14521197	14521193	blind	3	13161460	0	0	0.0441549
chr21	14521194	14521411	14521198	blind	5	13161461	0	0	0.0441549
chr21	14521194	14521411	14521407	blind	3	13161462	0	0	0.0441549
chr21	14521408	14521585	14521412	non_blind	5	13161463	0	0	0.0441549
chr21	14521582	14521659	14521655	non_blind	3	13161464	0	0	0.0441549
chr21	14521656	14521682	14521660	blind	5	13161465	0	0	0.0441549
chr21	14521656	14521682	14521678	blind	3	13161466	0	0	0.0441549
chr21	14521679	14521759	14521683	non_blind	5	13161467	0	0	0.0441549
chr21	14521849	14521949	14521945	non_blind	3	13161468	2	0.927252	0.0441549
chr21	14521946	14522095	14521950	blind	5	13161469	0	0	0.0441549
chr21	14521946	14522095	14522091	blind	3	13161470	0	0	0.0441549
chr21	14522092	14522556	14522096	blind	5	13161471	0	0	0.0441549
chr21	14522092	14522556	14522552	blind	3	13161472	0	0	0.0662323
chr21	14522553	14522653	14522557	blind	5	13161473	0	0	0.0662323
chr21	14522553	14522653	14522649	blind	3	13161474	0	0	0.0662323
chr21	14522650	14522736	14522654	blind	5	13161475	0	0	0.0662323
chr21	14522733	14523265	14522737	blind	5	13161477	0	0	0.0662323
chr21	14522733	14523265	14523261	blind	3	13161478	0	0	0.0662323
chr21	14523262	14523668	14523266	non_blind	5	13161479	0	0	0.0662323
chr21	14523990	14524452	14524448	non_blind	3	13161480	0	0	0.0220774
chr21	14524449	14524891	14524453	non_blind	5	13161481	0	0	0.0220774
chr21	14524888	14525157	14525153	non_blind	3	13161482	0	0	0.0220774
chr21	14525166	14525347	14525170	non_blind	5	13161485	1	0.463626	0.0220774
chr21	14525509	14525533	14525529	non_blind	3	13161486	0	0	0.0220774
chr21	14525530	14526160	14525534	non_blind	5	13161487	0	0	0.0220774
chr21	14526566	14526716	14526712	non_blind	3	13161488	0	0	0.0220774
chr21	14526713	14526840	14526717	non_blind	5	13161489	0	0	0.0220774
chr21	14526837	14526890	14526886	non_blind	3	13161490	0	0	0.0220774
chr21	14526887	14526976	14526891	non_blind	5	13161491	0	0	0.0220774
chr21	14526973	14527172	14527168	non_blind	3	13161492	0	0	0.0220774
chr21	14527169	14527303	14527173	blind	5	13161493	0	0	0.0220774
chr21	14527169	14527303	14527299	blind	3	13161494	0	0	0.0220774
chr21	14527300	14527664	14527304	non_blind	5	13161495	0	0	0.0220774
chr21	14527792	14527925	14527796	non_blind	5	13161497	0	0	5.05839e-14
chr21	14528149	14528512	14528508	non_blind	3	13161498	0	0	5.05839e-14
chr21	14528509	14528790	14528513	non_blind	5	13161499	0	0	5.05839e-14
chr21	14529381	14529461	14529385	non_blind	5	13161501	0	0	5.05839e-14
chr21	14530109	14530429	14530425	blind	3	13161506	0	0	5.05839e-14
chr21	14530426	14530639	14530430	non_blind	5	13161507	0	0	0.0662323
chr21	14530721	14531196	14531192	non_blind	3	13161508	0	0	0.0662323
chr21	14531193	14531461	14531197	blind	5	13161509	0	0	0.0662323
chr21	14531193	14531461	14531457	blind	3	13161510	0	0	0.0662323
chr21	14531458	14531536	14531462	non_blind	5	13161511	0	0	0.0662323
chr21	14531533	14531941	14531937	non_blind	3	13161512	0	0	0.0662323
chr21	14531938	14532038	14531942	non_blind	5	13161513	0	0	0.0662323
chr21	14532437	14532980	14532976	non_blind	3	13161514	0	0	0.0662323
chr21	14533744	14533793	14533748	blind	5	13161517	0	0	0.0662323
chr21	14533744	14533793	14533789	blind	3	13161518	0	0	0.0662323
chr21	14533790	14533819	14533794	non_blind	5	13161519	3	1.39088	0.0662323
chr21	14533951	14534124	14534120	non_blind	3	13161520	0	0	0.0662323
chr21	14534121	14534388	14534125	blind	5	13161521	0	0	0.0662323
chr21	14534121	14534388	14534384	blind	3	13161522	0	0	0.0662323
chr21	14534385	14534697	14534389	non_blind	5	13161523	0	0	0.0662323
chr21	14534783	14534849	14534845	non_blind	3	13161524	0	0	0.0662323
chr21	14534846	14535005	14534850	non_blind	5	13161525	0	0	0.0662323
chr21	14535002	14535077	14535073	non_blind	3	13161526	0	0	0.0662323
chr21	14535074	14535120	14535078	blind	5	13161527	0	0	0.0662323
chr21	14535074	14535120	14535116	blind	3	13161528	0	0	0.0662323
chr21	14535117	14535201	14535121	non_blind	5	13161529	0	0	0.0662323
chr21	14535404	14535440	14535436	non_blind	3	13161530	0	0	5.05839e-14
chr21	14535437	14535507	14535441	non_blind	5	13161531	0	0	5.05839e-14
chr21	14535757	14535786	14535782	non_blind	3	13161532	0	0	5.05839e-14
chr21	14535783	14535833	14535787	blind	5	13161533	0	0	5.05839e-14
chr21	14535783	14535833	14535829	blind	3	13161534	0	0	5.05839e-14
chr21	14535830	14536162	14536158	blind	3	13161536	0	0	5.05839e-14
chr21	14536159	14536204	14536163	non_blind	5	13161537	0	0	5.05839e-14
chr21	14536201	14536459	14536455	non_blind	3	13161538	0	0	5.05839e-14
chr21	14536456	14536782	14536460	non_blind	5	13161539	0	0	5.05839e-14
chr21	14536850	14537141	14537137	non_blind	3	13161540	0	0	5.05839e-14
chr21	14537138	14537566	14537142	non_blind	5	13161541	0	0	5.05839e-14
chr21	14538497	14538748	14538744	non_blind	3	13161542	0	0	5.05839e-14
chr21	14538745	14538972	14538749	blind	5	13161543	0	0	5.05839e-14
chr21	14538745	14538972	14538968	blind	3	13161544	0	0	5.05839e-14
chr21	14538969	14539038	14538973	blind	5	13161545	0	0	5.05839e-14
chr21	14538969	14539038	14539034	blind	3	13161546	0	0	5.05839e-14
chr21	14542178	14542294	14542182	non_blind	5	13161559	0	0	5.05839e-14
chr21	14542670	14542724	14542720	non_blind	3	13161560	0	0	5.05839e-14
chr21	14543425	14543607	14543603	non_blind	3	13161562	0	0	5.05839e-14
chr21	14543604	14544194	14543608	non_blind	5	13161563	0	0	5.05839e-14
chr21	14544541	14544892	14544888	non_blind	3	13161564	0	0	5.05839e-14
chr21	14544889	14544981	14544893	non_blind	5	13161565	0	0	5.05839e-14
chr21	14547146	14547226	14547222	non_blind	3	13161574	0	0	0.618168
chr21	14547223	14547319	14547227	blind	5	13161575	0	0	0.618168
chr21	14547223	14547319	14547315	blind	3	13161576	0	0	0.618168
chr21	14547316	14547403	14547320	non_blind	5	13161577	0	0	0.618168
chr21	14547862	14548072	14548068	non_blind	3	13161578	0	0	0.618168
chr21	14548069	14548233	14548073	non_blind	5	13161579	0	0	0.618168
chr21	14548345	14548520	14548516	non_blind	3	13161580	0	0	0.618168
chr21	14548517	14548716	14548521	blind	5	13161581	0	0	0.618168
chr21	14548517	14548716	14548712	blind	3	13161582	0	0	0.618168
chr21	14548725	14548902	14548729	non_blind	5	13161585	0	0	0.618168
chr21	14549047	14549223	14549219	non_blind	3	13161586	28	12.9815	0.618168
chr21	14549223	14549269	14549265	non_blind	3	13161588	0	0	0.618168
chr21	14549266	14549365	14549270	non_blind	5	13161589	0	0	0.618168
chr21	14549516	14549918	14549914	non_blind	3	13161590	0	0	0.618168
chr21	14549915	14550417	14549919	non_blind	5	13161591	0	0	0.618168
chr21	14550874	14551110	14551106	non_blind	3	13161592	0	0	0.618168
chr21	14551107	14551288	14551111	blind	5	13161593	0	0	0.618168
chr21	14551107	14551288	14551284	blind	3	13161594	0	0	0.618168
chr21	14551285	14551654	14551289	non_blind	5	13161595	0	0	0.618168
chr21	14552592	14553034	14553030	non_blind	3	13161596	0	0	0.618168
chr21	14553031	14553227	14553035	non_blind	5	13161597	0	0	0.618168
chr21	14553563	14553642	14553638	non_blind	3	13161598	0	0	5.05839e-14
chr21	14553639	14554206	14553643	non_blind	5	13161599	0	0	5.05839e-14
chr21	14554314	14554607	14554603	non_blind	3	13161600	0	0	5.05839e-14
chr21	14554607	14554666	14554662	non_blind	3	13161602	0	0	5.05839e-14
[truncated: 92,902 more rows]

## Sheet: 3A_E2 1hr R1
chr	start	end	position	type	fe_strand	fe_id	reads	normReads	norm4C
chr21	5103343	5103437	5103433	non_blind	3	13133862	0	0	0.141219
chr21	5145436	5146071	5145440	blind	5	13134039	0	0	0.141219
chr21	5220122	5220353	5220126	non_blind	5	13134163	0	0	0.141219
chr21	5222948	5223113	5222952	blind	5	13134173	0	0	-2.60321e-14
chr21	5228642	5228738	5228646	blind	5	13134197	0	0	-2.60321e-14
chr21	5229336	5229377	5229340	blind	5	13134209	0	0	-2.60321e-14
chr21	5229336	5229377	5229373	blind	3	13134210	0	0	-2.60321e-14
chr21	5231732	5231826	5231736	non_blind	5	13134229	0	0	-2.60321e-14
chr21	5233024	5233072	5233028	non_blind	5	13134233	0	0	-2.60321e-14
chr21	5248888	5249105	5248892	non_blind	5	13134297	0	0	-2.60321e-14
chr21	5250828	5251023	5251019	non_blind	3	13134306	0	0	-2.60321e-14
chr21	5251177	5251279	5251181	blind	5	13134309	0	0	-2.60321e-14
chr21	5357816	5358118	5358114	blind	3	13134578	0	0	-2.60321e-14
chr21	6505601	6505741	6505737	non_blind	3	13138004	0	0	-2.60321e-14
chr21	6914194	6914476	6914472	non_blind	3	13139360	0	0	-2.60321e-14
chr21	6916959	6917123	6916963	blind	5	13139369	0	0	-2.60321e-14
chr21	7257866	7258588	7258584	blind	3	13140224	0	0	-2.60321e-14
chr21	7258889	7259444	7259440	blind	3	13140230	0	0	-2.60321e-14
chr21	7260535	7260657	7260539	non_blind	5	13140235	0	0	-2.60321e-14
chr21	7915747	7916511	7915751	non_blind	5	13142157	0	0	-2.60321e-14
chr21	7931900	7932159	7931904	blind	5	13142159	0	0	-2.60321e-14
chr21	7936270	7937493	7937489	non_blind	3	13142166	0	0	-2.60321e-14
chr21	7940051	7940240	7940055	non_blind	5	13142171	0	0	-2.60321e-14
chr21	7942784	7943074	7943070	non_blind	3	13142174	0	0	-2.60321e-14
chr21	7943071	7943607	7943075	non_blind	5	13142175	0	0	-2.60321e-14
chr21	7947424	7951129	7951125	non_blind	3	13142176	0	0	-2.60321e-14
chr21	7951126	7951474	7951130	non_blind	5	13142177	0	0	-2.60321e-14
chr21	7957352	7958053	7958049	non_blind	3	13142194	0	0	-2.60321e-14
chr21	7965157	7965376	7965372	blind	3	13142210	0	0	-2.60321e-14
chr21	7965373	7965489	7965377	blind	5	13142211	0	0	-2.60321e-14
chr21	7968072	7968213	7968076	non_blind	5	13142219	0	0	-2.60321e-14
chr21	8049667	8049839	8049835	blind	3	13142268	0	0	-2.60321e-14
chr21	8252433	8252537	8252533	blind	3	13142978	0	0	-2.60321e-14
chr21	8252534	8252720	8252538	blind	5	13142979	0	0	-2.60321e-14
chr21	8252717	8253854	8252721	blind	5	13142981	0	0	-2.60321e-14
chr21	8255582	8255700	8255586	blind	5	13142997	0	0	-2.60321e-14
chr21	8255697	8256328	8255701	blind	5	13142999	0	0	-2.60321e-14
chr21	8550971	8551385	8550975	non_blind	5	13143913	0	0	-2.60321e-14
chr21	8631360	8631551	8631364	non_blind	5	13144195	0	0	-2.60321e-14
chr21	8759867	8760378	8760374	blind	3	13144472	0	0	-2.60321e-14
chr21	8764174	8764739	8764178	non_blind	5	13144485	0	0	-2.60321e-14
chr21	8772410	8772591	8772414	blind	5	13144535	0	0	-2.60321e-14
chr21	8774739	8774791	8774743	non_blind	5	13144553	0	0	-2.60321e-14
chr21	8781399	8781427	8781423	non_blind	3	13144586	0	0	-2.60321e-14
chr21	8782282	8782366	8782286	blind	5	13144595	0	0	-2.60321e-14
chr21	8812111	8812160	8812156	non_blind	3	13144746	0	0	-2.60321e-14
chr21	8838651	8838721	8838655	non_blind	5	13144887	0	0	-2.60321e-14
chr21	8988562	8988813	8988809	non_blind	3	13145090	0	0	-2.60321e-14
chr21	8989952	8990115	8989956	non_blind	5	13145095	0	0	-2.60321e-14
chr21	8990262	8990311	8990266	non_blind	5	13145097	0	0	-2.60321e-14
chr21	8990883	8991004	8991000	non_blind	3	13145100	0	0	-2.60321e-14
chr21	8991397	8991621	8991617	non_blind	3	13145102	0	0	-2.60321e-14
chr21	8991618	8991729	8991725	blind	3	13145104	0	0	-2.60321e-14
chr21	8991735	8991934	8991739	non_blind	5	13145107	0	0	-2.60321e-14
chr21	8993818	8994152	8994148	non_blind	3	13145108	0	0	-2.60321e-14
chr21	8994149	8994228	8994153	non_blind	5	13145109	0	0	-2.60321e-14
chr21	8994225	8994365	8994361	non_blind	3	13145110	0	0	-2.60321e-14
chr21	8994362	8994417	8994366	non_blind	5	13145111	0	0	-2.60321e-14
chr21	8994442	8994710	8994706	non_blind	3	13145112	0	0	-2.60321e-14
chr21	8994707	8994954	8994711	blind	5	13145113	0	0	-2.60321e-14
chr21	8994707	8994954	8994950	blind	3	13145114	0	0	-2.60321e-14
chr21	8994951	8995017	8994955	non_blind	5	13145115	0	0	-2.60321e-14
chr21	8995014	8995056	8995052	non_blind	3	13145116	0	0	-2.60321e-14
chr21	8995053	8995298	8995057	non_blind	5	13145117	0	0	-2.60321e-14
chr21	8995298	8995332	8995302	non_blind	5	13145119	0	0	-2.60321e-14
chr21	8995329	8995437	8995433	non_blind	3	13145120	0	0	-2.60321e-14
chr21	8995434	8995481	8995438	non_blind	5	13145121	0	0	-2.60321e-14
chr21	8995478	8995513	8995509	non_blind	3	13145122	0	0	-2.60321e-14
chr21	8995510	8995993	8995514	blind	5	13145123	0	0	-2.60321e-14
chr21	8998885	8999107	8999103	non_blind	3	13145130	0	0	-2.60321e-14
chr21	8999104	8999391	8999108	blind	5	13145131	0	0	-2.60321e-14
chr21	8999388	8999475	8999392	non_blind	5	13145133	0	0	-2.60321e-14
chr21	9001547	9001686	9001551	blind	5	13145145	0	0	-2.60321e-14
chr21	9004335	9004392	9004388	non_blind	3	13145158	0	0	-2.60321e-14
chr21	9007988	9008165	9008161	non_blind	3	13145174	0	0	-2.60321e-14
chr21	9008678	9008897	9008682	blind	5	13145177	0	0	-2.60321e-14
chr21	9008678	9008897	9008893	blind	3	13145178	0	0	-2.60321e-14
chr21	9011154	9011781	9011777	blind	3	13145186	0	0	-2.60321e-14
chr21	9014863	9015152	9014867	non_blind	5	13145205	0	0	-2.60321e-14
chr21	9015149	9015271	9015267	non_blind	3	13145206	0	0	-2.60321e-14
chr21	9015268	9015352	9015272	non_blind	5	13145207	0	0	-2.60321e-14
chr21	9029149	9029236	9029232	non_blind	3	13145280	0	0	-2.60321e-14
chr21	9071224	9071313	9071228	non_blind	5	13145419	0	0	-2.60321e-14
chr21	9076068	9076191	9076072	non_blind	5	13145439	0	0	-2.60321e-14
chr21	9091910	9091962	9091914	non_blind	5	13145495	0	0	-2.60321e-14
chr21	9108501	9108654	9108650	blind	3	13145594	0	0	-2.60321e-14
chr21	9120288	9120343	9120339	non_blind	3	13145654	0	0	-2.60321e-14
chr21	9317769	9317800	9317773	non_blind	5	13146403	0	0	-2.60321e-14
chr21	9363086	9363164	9363090	non_blind	5	13146661	0	0	-2.60321e-14
chr21	9612574	9612769	9612765	non_blind	3	13147166	0	0	-2.60321e-14
chr21	9647297	9647359	9647301	non_blind	5	13147341	0	0	-2.60321e-14
chr21	9653003	9653022	9653018	non_blind	3	13147356	0	0	-2.60321e-14
chr21	9656135	9656265	9656139	non_blind	5	13147375	0	0	-2.60321e-14
chr21	9699752	9699812	9699808	non_blind	3	13147548	0	0	-2.60321e-14
chr21	9699809	9699840	9699813	blind	5	13147549	0	0	-2.60321e-14
chr21	9699809	9699840	9699836	blind	3	13147550	0	0	-2.60321e-14
chr21	9699837	9699890	9699841	non_blind	5	13147551	0	0	-2.60321e-14
chr21	9699887	9699935	9699931	non_blind	3	13147552	0	0	-2.60321e-14
chr21	9722206	9722285	9722281	non_blind	3	13147628	0	0	-2.60321e-14
chr21	9722756	9722875	9722871	non_blind	3	13147634	0	0	-2.60321e-14
chr21	9725702	9726186	9726182	blind	3	13147652	0	0	-2.60321e-14
chr21	9728842	9728962	9728958	non_blind	3	13147668	0	0	-2.60321e-14
chr21	9739699	9739760	9739756	non_blind	3	13147684	0	0	-2.60321e-14
chr21	9742407	9742518	9742514	non_blind	3	13147686	0	0	-2.60321e-14
chr21	9744811	9744999	9744815	blind	5	13147699	0	0	-2.60321e-14
chr21	9745367	9745614	9745371	non_blind	5	13147703	0	0	-2.60321e-14
chr21	9746578	9746722	9746718	non_blind	3	13147706	0	0	-2.60321e-14
chr21	9747612	9747751	9747747	blind	3	13147712	0	0	-2.60321e-14
chr21	9751529	9751868	9751533	non_blind	5	13147723	0	0	-2.60321e-14
chr21	9751865	9751914	9751910	non_blind	3	13147724	0	0	-2.60321e-14
chr21	9752084	9752118	9752114	non_blind	3	13147738	0	0	-2.60321e-14
chr21	9752194	9752243	9752239	non_blind	3	13147746	0	0	-2.60321e-14
chr21	9752360	9752522	9752364	non_blind	5	13147751	0	0	-2.60321e-14
chr21	9754088	9754181	9754092	non_blind	5	13147757	0	0	-2.60321e-14
chr21	9758379	9758427	9758423	non_blind	3	13147778	0	0	-2.60321e-14
chr21	9758424	9759049	9758428	non_blind	5	13147779	0	0	-2.60321e-14
chr21	9759086	9759464	9759460	non_blind	3	13147780	0	0	-2.60321e-14
chr21	9759461	9759875	9759465	blind	5	13147781	0	0	-2.60321e-14
chr21	9759461	9759875	9759871	blind	3	13147782	0	0	-2.60321e-14
chr21	9759872	9759968	9759876	non_blind	5	13147783	0	0	-2.60321e-14
chr21	9760705	9760972	9760968	non_blind	3	13147784	0	0	-2.60321e-14
chr21	9760969	9761179	9760973	non_blind	5	13147785	0	0	0.480144
chr21	9761197	9761263	9761259	non_blind	3	13147786	0	0	0.480144
chr21	9761260	9761383	9761264	non_blind	5	13147787	0	0	0.480144
chr21	9761600	9761740	9761736	non_blind	3	13147788	0	0	0.480144
chr21	9761839	9762428	9762424	non_blind	3	13147790	0	0	0.480144
chr21	9762425	9762697	9762429	blind	5	13147791	0	0	0.480144
chr21	9762425	9762697	9762693	blind	3	13147792	0	0	0.480144
chr21	9762694	9762821	9762698	blind	5	13147793	0	0	0.480144
chr21	9762694	9762821	9762817	blind	3	13147794	0	0	0.480144
chr21	9762818	9763148	9762822	non_blind	5	13147795	0	0	0.480144
chr21	9763606	9763671	9763667	non_blind	3	13147796	17	10.083	0.480144
chr21	9763668	9763860	9763672	blind	5	13147797	0	0	0.480144
chr21	9763668	9763860	9763856	blind	3	13147798	0	0	0.480144
chr21	9763857	9763956	9763861	non_blind	5	13147799	0	0	0.480144
chr21	9763957	9764008	9763961	non_blind	5	13147801	0	0	0.480144
chr21	9764005	9764029	9764025	non_blind	3	13147802	0	0	0.480144
chr21	9764026	9764064	9764030	blind	5	13147803	0	0	0.480144
chr21	9764026	9764064	9764060	blind	3	13147804	0	0	0.480144
chr21	9764250	9764284	9764280	non_blind	3	13147806	0	0	0.480144
chr21	9770926	9770983	9770930	non_blind	5	13147829	0	0	0.480144
chr21	9772211	9772371	9772215	non_blind	5	13147833	0	0	0.480144
chr21	9775724	9775840	9775836	non_blind	3	13147850	0	0	-2.60532e-14
chr21	9776252	9776424	9776420	non_blind	3	13147858	0	0	-2.60532e-14
chr21	9776421	9776528	9776524	blind	3	13147860	0	0	-2.60532e-14
chr21	9777170	9777410	9777174	non_blind	5	13147867	0	0	-2.60532e-14
chr21	9777554	9777597	9777558	blind	5	13147869	0	0	-2.60532e-14
chr21	9782497	9782572	9782501	non_blind	5	13147897	0	0	-2.60532e-14
chr21	9784229	9784307	9784303	non_blind	3	13147906	0	0	-2.60532e-14
chr21	9785321	9785485	9785481	non_blind	3	13147912	0	0	-2.60532e-14
chr21	9788219	9788366	9788362	non_blind	3	13147938	0	0	-2.60532e-14
chr21	9788363	9788430	9788426	blind	3	13147940	0	0	-2.60532e-14
chr21	9788518	9788555	9788551	non_blind	3	13147944	0	0	-2.60532e-14
chr21	9790316	9790351	9790347	non_blind	3	13147962	0	0	-2.60532e-14
chr21	9792901	9793086	9793082	non_blind	3	13147982	0	0	-2.60532e-14
chr21	9796160	9796353	9796164	non_blind	5	13147999	0	0	-2.60532e-14
chr21	9810983	9811058	9811054	blind	3	13148076	0	0	-2.60532e-14
chr21	9812698	9812989	9812985	non_blind	3	13148084	0	0	-2.60532e-14
chr21	9813254	9813723	9813719	non_blind	3	13148088	0	0	-2.60532e-14
chr21	9820293	9820852	9820848	non_blind	3	13148128	0	0	-2.60532e-14
chr21	9836920	9837050	9836924	blind	5	13148215	0	0	-2.60532e-14
chr21	9836920	9837050	9837046	blind	3	13148216	0	0	-2.60532e-14
chr21	9838035	9838158	9838154	non_blind	3	13148224	0	0	-2.60532e-14
chr21	9838155	9838325	9838159	blind	5	13148225	0	0	-2.60532e-14
chr21	9838155	9838325	9838321	blind	3	13148226	0	0	-2.60532e-14
chr21	9839150	9839225	9839154	blind	5	13148233	0	0	-2.60532e-14
chr21	9839150	9839225	9839221	blind	3	13148234	0	0	-2.60532e-14
chr21	9839222	9839461	9839226	non_blind	5	13148235	0	0	-2.60532e-14
chr21	9839829	9839976	9839833	non_blind	5	13148239	0	0	-2.60532e-14
chr21	9840391	9840494	9840395	non_blind	5	13148243	0	0	-2.60532e-14
chr21	9840599	9840746	9840603	non_blind	5	13148245	0	0	-2.60532e-14
chr21	9840850	9841009	9841005	blind	3	13148248	0	0	-2.60532e-14
chr21	9844735	9844885	9844881	blind	3	13148270	0	0	-2.60532e-14
chr21	9851604	9851769	9851608	non_blind	5	13148303	0	0	-2.60532e-14
chr21	9860532	9861034	9861030	blind	3	13148362	0	0	-2.60532e-14
chr21	9861044	9861169	9861165	non_blind	3	13148364	0	0	-2.60532e-14
chr21	9862330	9862444	9862440	non_blind	3	13148366	0	0	-2.60532e-14
chr21	9865165	9865374	9865169	blind	5	13148383	0	0	-2.60532e-14
chr21	9869964	9870126	9869968	blind	5	13148399	0	0	-2.60532e-14
chr21	9871121	9871208	9871125	non_blind	5	13148405	0	0	-2.60532e-14
chr21	9874432	9874519	9874515	non_blind	3	13148416	0	0	-2.60532e-14
chr21	9877816	9877914	9877910	blind	3	13148430	0	0	-2.60532e-14
chr21	9887819	9887938	9887934	non_blind	3	13148484	0	0	-2.60532e-14
chr21	9892364	9892516	9892368	non_blind	5	13148507	0	0	-2.60532e-14
chr21	9893917	9893939	9893935	non_blind	3	13148516	0	0	-2.60532e-14
chr21	9898034	9898078	9898074	non_blind	3	13148536	0	0	-2.60532e-14
chr21	9914898	9915175	9914902	blind	5	13148591	0	0	-2.60532e-14
chr21	9917303	9917482	9917307	blind	5	13148605	0	0	-2.60532e-14
chr21	9923341	9923896	9923345	non_blind	5	13148627	0	0	0.112975
chr21	9926371	9926396	9926375	blind	5	13148637	0	0	0.112975
chr21	9926371	9926396	9926392	blind	3	13148638	0	0	0.112975
chr21	9945840	9946342	9946338	blind	3	13148708	0	0	0.112975
chr21	9946536	9946747	9946540	non_blind	5	13148711	0	0	0.112975
chr21	9971890	9971931	9971894	blind	5	13148805	0	0	0.112975
chr21	9971890	9971931	9971927	blind	3	13148806	0	0	0.112975
chr21	9972948	9973301	9973297	non_blind	3	13148808	0	0	0.112975
chr21	9973298	9973681	9973302	blind	5	13148809	0	0	0.112975
chr21	9973298	9973681	9973677	blind	3	13148810	0	0	0.112975
chr21	9974839	9975085	9975081	non_blind	3	13148816	4	2.37248	0.112975
chr21	9976254	9976444	9976440	non_blind	3	13148818	0	0	0.112975
chr21	9978274	9978504	9978500	non_blind	3	13148832	0	0	0.112975
chr21	9988829	9988941	9988937	blind	3	13148864	0	0	0.112975
chr21	10005285	10005363	10005359	blind	3	13148932	0	0	0.112975
chr21	10014824	10014855	10014851	non_blind	3	13148964	0	0	0.112975
chr21	10014852	10015019	10015015	blind	3	13148966	0	0	0.112975
chr21	10024499	10024660	10024656	non_blind	3	13149004	0	0	0.112975
chr21	10270164	10270253	10270168	non_blind	5	13149597	0	0	0.112975
chr21	10270250	10270341	10270337	non_blind	3	13149598	0	0	0.141219
chr21	10272116	10272274	10272270	non_blind	3	13149606	0	0	0.141219
chr21	10272271	10272341	10272275	non_blind	5	13149607	0	0	0.0282438
chr21	10328958	10329145	10328962	non_blind	5	13149637	0	0	0.0282438
chr21	10329352	10329503	10329499	non_blind	3	13149638	0	0	0.0282438
chr21	10329500	10329627	10329623	blind	3	13149640	0	0	0.0282438
chr21	10331135	10331210	10331139	blind	5	13149655	0	0	0.0282438
chr21	10332950	10333097	10332954	non_blind	5	13149665	0	0	0.0282438
chr21	10336047	10336172	10336168	blind	3	13149696	0	0	0.0282438
chr21	10337182	10337277	10337273	blind	3	13149706	0	0	0.0282438
chr21	10343450	10343663	10343659	blind	3	13149734	1	0.593119	0.0282438
chr21	10359139	10359252	10359143	blind	5	13149831	0	0	0.0282438
chr21	10360026	10360725	10360030	blind	5	13149835	0	0	0.0282438
chr21	10361542	10361574	10361546	non_blind	5	13149839	0	0	0.0282438
chr21	10384422	10384448	10384426	non_blind	5	13149987	0	0	0.0282438
chr21	10385739	10385794	10385743	non_blind	5	13149993	0	0	0.0282438
chr21	10386499	10386895	10386891	blind	3	13150002	0	0	0.0282438
chr21	10387145	10387168	10387149	non_blind	5	13150007	0	0	0.0282438
chr21	10400673	10401034	10400677	non_blind	5	13150097	0	0	0.0282438
chr21	10402596	10402677	10402673	non_blind	3	13150108	0	0	0.0282438
chr21	10403107	10403148	10403111	blind	5	13150115	0	0	0.0282438
chr21	10405428	10405450	10405432	blind	5	13150135	0	0	-2.60532e-14
chr21	10405428	10405450	10405446	blind	3	13150136	0	0	-2.60532e-14
chr21	10405480	10405541	10405537	blind	3	13150142	0	0	-2.60532e-14
chr21	10406569	10406615	10406611	non_blind	3	13150150	0	0	-2.60532e-14
chr21	10410717	10410779	10410721	non_blind	5	13150167	0	0	-2.60532e-14
chr21	10413839	10414269	10413843	non_blind	5	13150171	0	0	-2.60532e-14
chr21	10417685	10417751	10417747	non_blind	3	13150188	0	0	-2.60532e-14
chr21	10418518	10418967	10418522	non_blind	5	13150197	0	0	-2.60532e-14
chr21	10419240	10419367	10419244	non_blind	5	13150199	0	0	-2.60532e-14
chr21	10420793	10420865	10420861	non_blind	3	13150206	0	0	-2.60532e-14
chr21	10423203	10423389	10423207	non_blind	5	13150219	0	0	-2.60532e-14
chr21	10423386	10423416	10423412	non_blind	3	13150220	0	0	-2.60532e-14
chr21	10424554	10424599	10424558	blind	5	13150233	0	0	0.0282438
chr21	10424554	10424599	10424595	blind	3	13150234	0	0	0.0282438
chr21	10426144	10426452	10426148	blind	5	13150239	0	0	0.0282438
chr21	10426449	10426482	10426453	blind	5	13150241	0	0	0.0282438
chr21	10426449	10426482	10426478	blind	3	13150242	0	0	0.0282438
chr21	10426479	10427049	10426483	non_blind	5	13150243	0	0	0.0282438
chr21	10427511	10427573	10427569	non_blind	3	13150244	0	0	0.0282438
chr21	10429646	10429717	10429713	non_blind	3	13150250	0	0	0.0282438
chr21	10429714	10429742	10429718	non_blind	5	13150251	0	0	0.0282438
chr21	10431251	10431389	10431385	blind	3	13150258	0	0	0.0282438
chr21	10437895	10438001	10437899	blind	5	13150289	1	0.593119	0.0282438
chr21	10438329	10438348	10438333	non_blind	5	13150297	0	0	0.0282438
chr21	10454428	10454530	10454432	non_blind	5	13150357	0	0	0.0282438
chr21	10456392	10456573	10456569	non_blind	3	13150364	0	0	0.0282438
chr21	10457603	10458082	10458078	non_blind	3	13150372	0	0	0.0282438
chr21	10458079	10458188	10458184	blind	3	13150374	0	0	0.0282438
chr21	10458371	10458522	10458375	non_blind	5	13150379	0	0	0.0282438
chr21	10458782	10458837	10458786	blind	5	13150381	0	0	0.0282438
chr21	10458782	10458837	10458833	blind	3	13150382	0	0	0.0282438
chr21	10458834	10459163	10458838	non_blind	5	13150383	0	0	0.0282438
chr21	10459347	10459576	10459351	non_blind	5	13150385	0	0	0.0282438
chr21	10460593	10460760	10460756	blind	3	13150390	0	0	-2.60532e-14
chr21	10463225	10463299	10463229	non_blind	5	13150401	0	0	-2.60532e-14
chr21	10464466	10464520	10464470	blind	5	13150411	0	0	-2.60532e-14
chr21	10464466	10464520	10464516	blind	3	13150412	0	0	-2.60532e-14
chr21	10464517	10464589	10464521	blind	5	13150413	0	0	-2.60532e-14
chr21	10464680	10464797	10464684	non_blind	5	13150417	0	0	0.310681
chr21	10464794	10465354	10465350	non_blind	3	13150418	0	0	0.310681
chr21	10466744	10467194	10467190	blind	3	13150422	0	0	0.310681
chr21	10467191	10467232	10467195	non_blind	5	13150423	0	0	0.310681
chr21	10471904	10471961	10471908	non_blind	5	13150445	0	0	0.310681
chr21	10481050	10481133	10481054	blind	5	13150489	0	0	0.338925
chr21	10483107	10483134	10483130	non_blind	3	13150492	0	0	0.338925
chr21	10511213	10511266	10511217	blind	5	13150655	0	0	0.338925
chr21	10511263	10511378	10511374	blind	3	13150658	0	0	0.338925
chr21	10512566	10512608	10512604	non_blind	3	13150668	0	0	0.338925
chr21	10528003	10528143	10528007	non_blind	5	13150731	11	6.52431	0.338925
chr21	10530071	10530145	10530075	non_blind	5	13150737	0	0	0.338925
chr21	10536394	10536654	10536650	non_blind	3	13150752	0	0	0.338925
chr21	10539415	10539450	10539446	non_blind	3	13150762	0	0	0.338925
chr21	10541116	10541190	10541120	non_blind	5	13150771	0	0	0.338925
chr21	10545627	10545665	10545631	non_blind	5	13150781	1	0.593119	0.338925
chr21	10546922	10547051	10546926	non_blind	5	13150789	0	0	0.338925
chr21	10551373	10551471	10551467	non_blind	3	13150798	0	0	0.338925
chr21	10552085	10552120	10552116	non_blind	3	13150802	0	0	0.338925
chr21	10562621	10562765	10562761	non_blind	3	13150844	0	0	0.338925
chr21	10564652	10564758	10564754	non_blind	3	13150856	0	0	0.338925
chr21	10569415	10569554	10569419	non_blind	5	13150877	0	0	0.0282438
chr21	10570041	10570098	10570094	non_blind	3	13150882	0	0	0.0282438
chr21	10570285	10570408	10570404	non_blind	3	13150884	0	0	0.0282438
chr21	10573273	10573436	10573432	blind	3	13150900	0	0	0.0282438
chr21	10574096	10574199	10574100	blind	5	13150905	0	0	0.0282438
chr21	10578645	10578965	10578961	non_blind	3	13150942	0	0	-2.60321e-14
chr21	10579629	10579716	10579712	non_blind	3	13150948	0	0	-2.60321e-14
chr21	10581758	10581840	10581836	blind	3	13150954	0	0	-2.60321e-14
chr21	10583305	10583601	10583309	non_blind	5	13150961	0	0	-2.60321e-14
chr21	10591871	10591942	10591875	blind	5	13150995	0	0	-2.60321e-14
chr21	10598026	10598109	10598030	non_blind	5	13151015	0	0	-2.60321e-14
chr21	10602204	10602273	10602269	non_blind	3	13151034	0	0	-2.60321e-14
chr21	10603056	10603089	10603085	non_blind	3	13151038	0	0	-2.60321e-14
chr21	10611988	10612036	10611992	non_blind	5	13151073	0	0	-2.60321e-14
chr21	10612043	10612084	10612047	non_blind	5	13151075	0	0	-2.60321e-14
chr21	10617045	10617712	10617708	non_blind	3	13151090	0	0	-2.60321e-14
chr21	10618930	10618983	10618979	blind	3	13151096	0	0	-2.60321e-14
chr21	10625660	10626048	10625664	non_blind	5	13151121	0	0	-2.60321e-14
chr21	10630134	10630173	10630138	non_blind	5	13151133	0	0	-2.60321e-14
chr21	10630708	10630981	10630712	non_blind	5	13151135	0	0	-2.60321e-14
chr21	10631849	10631893	10631889	non_blind	3	13151140	0	0	-2.60321e-14
chr21	10636028	10636070	10636066	blind	3	13151172	0	0	-2.60321e-14
chr21	10638509	10638609	10638605	blind	3	13151192	0	0	-2.60321e-14
chr21	10638606	10638981	10638610	non_blind	5	13151193	0	0	-2.60321e-14
chr21	10638994	10639459	10639455	non_blind	3	13151194	0	0	-2.60321e-14
chr21	10639456	10639481	10639460	non_blind	5	13151195	0	0	-2.60321e-14
chr21	10641425	10641529	10641525	blind	3	13151208	0	0	-2.60321e-14
chr21	10642003	10642096	10642007	non_blind	5	13151211	0	0	-2.60321e-14
chr21	10645587	10646081	10645591	blind	5	13151229	0	0	-2.60321e-14
chr21	10654651	10654729	10654725	non_blind	3	13151260	0	0	-2.60321e-14
chr21	10654726	10654748	10654730	non_blind	5	13151261	0	0	-2.60321e-14
chr21	10655646	10655762	10655758	non_blind	3	13151262	0	0	-2.60321e-14
chr21	10655759	10656165	10655763	blind	5	13151263	0	0	-2.60321e-14
chr21	10656162	10656292	10656166	non_blind	5	13151265	0	0	-2.60321e-14
chr21	10659646	10659757	10659650	non_blind	5	13151267	0	0	-2.60321e-14
chr21	10661841	10661996	10661992	non_blind	3	13151268	0	0	-2.60321e-14
chr21	10666060	10666228	10666224	non_blind	3	13151270	0	0	-2.60321e-14
chr21	10666225	10667627	10666229	blind	5	13151271	0	0	-2.60321e-14
chr21	10666225	10667627	10667623	blind	3	13151272	0	0	-2.60321e-14
chr21	10694523	10694804	10694527	non_blind	5	13151283	0	0	-2.60321e-14
chr21	10700407	10701017	10700411	non_blind	5	13151287	0	0	-2.60321e-14
chr21	10708671	10709773	10708675	non_blind	5	13151289	0	0	-2.60321e-14
chr21	10725621	10726048	10725625	non_blind	5	13151295	0	0	-2.60321e-14
chr21	10727430	10727647	10727434	non_blind	5	13151297	0	0	-2.60321e-14
chr21	10729429	10729641	10729433	non_blind	5	13151299	0	0	-2.60321e-14
chr21	10729638	10730411	10730407	non_blind	3	13151300	0	0	-2.60321e-14
chr21	10730408	10730596	10730412	non_blind	5	13151301	0	0	-2.60321e-14
chr21	10733153	10733509	10733505	non_blind	3	13151304	0	0	-2.60321e-14
chr21	10733506	10733847	10733510	non_blind	5	13151305	0	0	-2.60321e-14
chr21	10738196	10738229	10738225	non_blind	3	13151306	0	0	-2.60321e-14
chr21	10745635	10747089	10747085	non_blind	3	13151342	0	0	-2.60321e-14
chr21	10752599	10752972	10752603	non_blind	5	13151355	0	0	-2.60321e-14
chr21	10753115	10753463	10753119	non_blind	5	13151357	0	0	-2.60321e-14
chr21	10754002	10754723	10754719	non_blind	3	13151360	0	0	-2.60321e-14
chr21	10762201	10762710	10762706	non_blind	3	13151372	0	0	-2.60321e-14
chr21	10763181	10763925	10763921	non_blind	3	13151374	0	0	-2.60321e-14
chr21	10766482	10767616	10766486	non_blind	5	13151377	0	0	-2.60321e-14
chr21	10781971	10782475	10782471	non_blind	3	13151416	0	0	-2.60321e-14
chr21	10787700	10787897	10787893	non_blind	3	13151430	0	0	-2.60321e-14
chr21	10790170	10791180	10791176	blind	3	13151434	0	0	-2.60321e-14
chr21	10795476	10795650	10795480	blind	5	13151445	0	0	-2.60321e-14
chr21	10795687	10796455	10796451	non_blind	3	13151448	0	0	-2.60321e-14
chr21	10798336	10799023	10799019	blind	3	13151460	0	0	-2.60321e-14
chr21	10808709	10809143	10809139	non_blind	3	13151480	0	0	-2.60321e-14
chr21	10869351	10869596	10869592	non_blind	3	13151496	0	0	-2.60321e-14
chr21	10888962	10889358	10888966	non_blind	5	13151547	0	0	-2.60321e-14
chr21	11041435	11041583	11041439	non_blind	5	13151687	0	0	-2.60321e-14
chr21	11122396	11122515	11122511	non_blind	3	13151752	0	0	-2.60321e-14
chr21	11240689	11240901	11240897	non_blind	3	13151938	0	0	-2.60321e-14
chr21	11522772	11523214	11523210	non_blind	3	13152386	0	0	-2.60321e-14
chr21	11529255	11529691	11529687	non_blind	3	13152398	0	0	-2.60321e-14
chr21	11529688	11530030	11529692	blind	5	13152399	0	0	-2.60321e-14
chr21	11543664	11544260	11543668	non_blind	5	13152419	0	0	-2.60321e-14
chr21	11564134	11564729	11564138	non_blind	5	13152453	0	0	-2.60321e-14
chr21	11567446	11568223	11568219	non_blind	3	13152458	0	0	-2.60321e-14
chr21	11973958	11974553	11973962	non_blind	5	13153109	0	0	-2.60321e-14
chr21	12012749	12013523	12013519	non_blind	3	13153166	0	0	-2.60321e-14
chr21	12025804	12026400	12025808	non_blind	5	13153187	0	0	-2.60321e-14
chr21	12915010	12915075	12915071	non_blind	3	13154414	0	0	-2.60321e-14
chr21	12966713	12967058	12966717	non_blind	5	13154419	0	0	-2.60321e-14
chr21	12967335	12968265	12967339	non_blind	5	13154423	0	0	-2.60321e-14
chr21	12969264	12969438	12969268	blind	5	13154425	0	0	-2.60321e-14
chr21	12981946	12983316	12983312	blind	3	13154450	0	0	-2.60321e-14
chr21	12991029	12991860	12991033	non_blind	5	13154457	0	0	-2.60321e-14
chr21	13003068	13003178	13003072	non_blind	5	13154491	0	0	-2.60321e-14
chr21	13018024	13018117	13018028	non_blind	5	13154575	0	0	-2.60321e-14
chr21	13020986	13021247	13020990	non_blind	5	13154593	0	0	-2.60321e-14
chr21	13035735	13035885	13035739	non_blind	5	13154665	0	0	-2.60321e-14
chr21	13075563	13075603	13075567	non_blind	5	13154873	0	0	-2.60321e-14
chr21	13080248	13080306	13080302	blind	3	13154894	0	0	-2.60321e-14
chr21	13106254	13106303	13106258	non_blind	5	13154977	0	0	-2.60321e-14
chr21	13109507	13110048	13110044	non_blind	3	13154984	0	0	-2.60321e-14
chr21	13110264	13110473	13110469	blind	3	13154988	0	0	-2.60321e-14
chr21	13187910	13188070	13187914	non_blind	5	13155313	0	0	-2.60321e-14
chr21	13225959	13226185	13226181	non_blind	3	13155490	0	0	-2.60321e-14
chr21	13228929	13229323	13229319	non_blind	3	13155500	0	0	-2.60321e-14
chr21	13240640	13240885	13240881	non_blind	3	13155550	0	0	-2.60321e-14
chr21	13241315	13241351	13241319	blind	5	13155555	0	0	-2.60321e-14
chr21	13241348	13241540	13241352	non_blind	5	13155557	0	0	-2.60321e-14
chr21	13255387	13255471	13255391	blind	5	13155619	0	0	-2.60321e-14
chr21	13256600	13257411	13256604	blind	5	13155625	0	0	-2.60321e-14
chr21	13259226	13259252	13259230	non_blind	5	13155643	0	0	-2.60321e-14
chr21	13262934	13263091	13262938	non_blind	5	13155667	0	0	-2.60321e-14
chr21	13266562	13266617	13266613	blind	3	13155684	0	0	-2.60321e-14
chr21	13280593	13280640	13280636	non_blind	3	13155738	0	0	-2.60321e-14
chr21	13280637	13280744	13280641	non_blind	5	13155739	0	0	-2.60321e-14
chr21	13282252	13282335	13282331	non_blind	3	13155744	0	0	-2.60321e-14
chr21	13284422	13284509	13284426	non_blind	5	13155751	0	0	-2.60321e-14
chr21	13284620	13284683	13284679	blind	3	13155754	0	0	-2.60321e-14
chr21	13296880	13297049	13296884	blind	5	13155797	0	0	-2.60321e-14
chr21	13297589	13297664	13297593	non_blind	5	13155801	0	0	-2.60321e-14
chr21	13299745	13299949	13299945	non_blind	3	13155808	0	0	-2.60321e-14
chr21	13302671	13302743	13302675	blind	5	13155813	0	0	-2.60321e-14
chr21	13313015	13313282	13313278	non_blind	3	13155854	0	0	-2.60321e-14
chr21	13314520	13314585	13314581	non_blind	3	13155864	0	0	-2.60321e-14
chr21	13316454	13316531	13316527	non_blind	3	13155878	0	0	-2.60321e-14
chr21	13316528	13316637	13316633	blind	3	13155880	0	0	-2.60321e-14
chr21	13319808	13319838	13319834	non_blind	3	13155904	0	0	-2.60321e-14
chr21	13331966	13332062	13331970	non_blind	5	13155975	0	0	-2.60321e-14
chr21	13333959	13334003	13333999	non_blind	3	13155982	0	0	-2.60321e-14
chr21	13334328	13334456	13334332	non_blind	5	13155985	0	0	-2.60321e-14
chr21	13341836	13342062	13341840	non_blind	5	13156007	0	0	-2.60321e-14
chr21	13354279	13354380	13354283	non_blind	5	13156061	0	0	-2.60321e-14
chr21	13363048	13363240	13363236	non_blind	3	13156094	0	0	-2.60321e-14
chr21	13376807	13377021	13376811	blind	5	13156127	0	0	-2.60321e-14
chr21	13381667	13382093	13381671	blind	5	13156137	0	0	-2.60321e-14
chr21	13403415	13403459	13403455	non_blind	3	13156220	0	0	-2.60321e-14
chr21	13405111	13405372	13405368	non_blind	3	13156230	0	0	-2.60321e-14
chr21	13407055	13407207	13407059	blind	5	13156247	0	0	-2.60321e-14
chr21	13407808	13407869	13407812	non_blind	5	13156251	0	0	-2.60321e-14
chr21	13407955	13407981	13407959	blind	5	13156253	0	0	-2.60321e-14
chr21	13407955	13407981	13407977	blind	3	13156254	0	0	-2.60321e-14
chr21	13407978	13408441	13407982	non_blind	5	13156255	0	0	-2.60321e-14
chr21	13411434	13411555	13411438	non_blind	5	13156277	0	0	-2.60321e-14
chr21	13414129	13414468	13414464	non_blind	3	13156284	0	0	-2.60321e-14
chr21	13420103	13420177	13420107	non_blind	5	13156319	0	0	-2.60321e-14
chr21	13422105	13422140	13422109	non_blind	5	13156329	0	0	-2.60321e-14
chr21	13424079	13424186	13424182	non_blind	3	13156334	0	0	-2.60321e-14
chr21	13424299	13424466	13424303	non_blind	5	13156339	0	0	-2.60321e-14
chr21	13428113	13428379	13428375	non_blind	3	13156350	0	0	-2.60321e-14
chr21	13430676	13430945	13430680	non_blind	5	13156361	0	0	-2.60321e-14
chr21	13431188	13431242	13431238	non_blind	3	13156364	0	0	-2.60321e-14
chr21	13432508	13432558	13432554	non_blind	3	13156374	0	0	-2.60321e-14
chr21	13435212	13435304	13435300	non_blind	3	13156402	0	0	-2.60321e-14
chr21	13448072	13448302	13448076	non_blind	5	13156455	0	0	-2.60321e-14
chr21	13451061	13451125	13451121	non_blind	3	13156472	0	0	-2.60321e-14
chr21	13452413	13452740	13452736	blind	3	13156488	0	0	-2.60321e-14
chr21	13452737	13452995	13452741	blind	5	13156489	0	0	-2.60321e-14
chr21	13452992	13453088	13452996	non_blind	5	13156491	0	0	-2.60321e-14
chr21	13455933	13456328	13455937	non_blind	5	13156513	0	0	-2.60321e-14
chr21	13462923	13463372	13462927	non_blind	5	13156555	0	0	-2.60321e-14
chr21	13463731	13463881	13463735	non_blind	5	13156561	0	0	-2.60321e-14
chr21	13464389	13464995	13464991	blind	3	13156564	0	0	-2.60321e-14
chr21	13474614	13474698	13474618	non_blind	5	13156617	0	0	-2.60321e-14
chr21	13476265	13476447	13476443	non_blind	3	13156624	0	0	-2.60321e-14
chr21	13479249	13479719	13479715	non_blind	3	13156634	0	0	-2.60321e-14
chr21	13491168	13491307	13491303	non_blind	3	13156708	0	0	-2.60321e-14
chr21	13493881	13494011	13493885	blind	5	13156717	0	0	-2.60321e-14
chr21	13499784	13499837	13499788	non_blind	5	13156739	0	0	-2.60321e-14
chr21	13501730	13501955	13501951	blind	3	13156756	0	0	-2.60321e-14
chr21	13508434	13508697	13508438	blind	5	13156787	0	0	-2.60321e-14
chr21	13515875	13515901	13515879	non_blind	5	13156819	0	0	-2.60321e-14
chr21	13527085	13527262	13527089	non_blind	5	13156869	0	0	-2.60321e-14
chr21	13527884	13527963	13527959	non_blind	3	13156876	0	0	-2.60321e-14
chr21	13548272	13548502	13548498	non_blind	3	13156958	0	0	-2.60321e-14
chr21	13549774	13550112	13549778	non_blind	5	13156965	0	0	-2.60321e-14
chr21	13555409	13555558	13555413	non_blind	5	13156987	0	0	-2.60321e-14
chr21	13562216	13562523	13562220	non_blind	5	13157013	0	0	-2.60321e-14
chr21	13570347	13570407	13570351	non_blind	5	13157047	0	0	-2.60321e-14
chr21	13571984	13572044	13572040	blind	3	13157052	0	0	-2.60321e-14
chr21	13572041	13572165	13572045	blind	5	13157053	0	0	-2.60321e-14
chr21	13573645	13573765	13573649	non_blind	5	13157069	0	0	-2.60321e-14
chr21	13577333	13577432	13577428	blind	3	13157082	0	0	-2.60321e-14
chr21	13606075	13606141	13606079	blind	5	13157207	0	0	0.112975
chr21	13643399	13643423	13643419	non_blind	3	13157368	0	0	0.112975
chr21	13735777	13735841	13735781	non_blind	5	13157767	0	0	0.112975
chr21	13799384	13799516	13799512	non_blind	3	13158060	0	0	0.112975
chr21	13802089	13802260	13802256	non_blind	3	13158078	0	0	0.112975
chr21	13806638	13807033	13807029	non_blind	3	13158110	0	0	0.112975
chr21	13807093	13807334	13807330	blind	3	13158114	0	0	0.112975
chr21	13809477	13809772	13809768	non_blind	3	13158142	0	0	0.112975
chr21	13810002	13810075	13810006	non_blind	5	13158145	0	0	0.112975
chr21	13810898	13811026	13810902	blind	5	13158153	0	0	0.112975
chr21	13814904	13815027	13815023	non_blind	3	13158170	4	2.37248	0.112975
chr21	13823894	13824438	13824434	non_blind	3	13158222	0	0	0.112975
chr21	13824435	13824617	13824439	non_blind	5	13158223	0	0	0.112975
chr21	13825163	13825271	13825267	non_blind	3	13158228	0	0	0.112975
chr21	13825302	13825555	13825306	non_blind	5	13158231	0	0	0.112975
chr21	13827652	13827762	13827758	non_blind	3	13158238	0	0	0.112975
chr21	13827835	13827931	13827839	non_blind	5	13158241	0	0	0.112975
chr21	13834499	13834546	13834503	blind	5	13158269	0	0	0.112975
chr21	13846567	13846743	13846571	non_blind	5	13158325	0	0	0.112975
chr21	13848065	13848116	13848069	non_blind	5	13158335	0	0	0.112975
chr21	13848741	13848805	13848745	non_blind	5	13158339	0	0	0.112975
chr21	13849084	13849317	13849313	blind	3	13158342	0	0	-2.60321e-14
chr21	13850429	13850571	13850567	non_blind	3	13158348	0	0	-2.60321e-14
chr21	13851664	13851945	13851668	non_blind	5	13158365	0	0	-2.60321e-14
chr21	13854814	13855033	13854818	non_blind	5	13158371	0	0	-2.60321e-14
chr21	13860579	13860726	13860583	blind	5	13158387	0	0	-2.60321e-14
chr21	13861576	13861897	13861580	non_blind	5	13158403	0	0	0.0282438
chr21	13862560	13862874	13862870	non_blind	3	13158404	0	0	0.0282438
chr21	13867019	13867107	13867103	blind	3	13158422	0	0	0.0282438
chr21	13870355	13870491	13870487	blind	3	13158446	0	0	0.0282438
chr21	13878163	13878247	13878243	non_blind	3	13158470	0	0	0.0282438
chr21	13880071	13880160	13880156	non_blind	3	13158474	0	0	0.0282438
chr21	13883370	13883474	13883470	non_blind	3	13158496	0	0	0.0282438
chr21	13883471	13883576	13883475	non_blind	5	13158497	0	0	0.0282438
chr21	13883815	13884040	13883819	non_blind	5	13158499	0	0	0.0282438
chr21	13884335	13884660	13884339	non_blind	5	13158501	0	0	0.0282438
chr21	13888487	13888517	13888513	non_blind	3	13158528	1	0.593119	0.0282438
chr21	13894563	13894627	13894623	non_blind	3	13158548	0	0	0.0282438
chr21	13905365	13905540	13905369	non_blind	5	13158595	0	0	0.0282438
chr21	13913351	13913549	13913545	non_blind	3	13158610	0	0	0.0282438
chr21	13919498	13919551	13919547	blind	3	13158640	0	0	0.0282438
chr21	13919548	13919727	13919552	blind	5	13158641	0	0	0.0282438
chr21	13920044	13920344	13920048	blind	5	13158647	0	0	0.0282438
chr21	13925405	13925605	13925601	blind	3	13158672	0	0	0.0282438
chr21	13927357	13927874	13927870	non_blind	3	13158684	0	0	0.0282438
chr21	13979902	13980053	13980049	non_blind	3	13158906	0	0	0.0282438
chr21	13981874	13981997	13981878	non_blind	5	13158915	0	0	0.0282438
chr21	13985335	13985502	13985498	non_blind	3	13158928	0	0	-2.60321e-14
chr21	13985580	13985613	13985584	non_blind	5	13158931	0	0	-2.60321e-14
chr21	14000414	14000519	14000418	blind	5	13159007	0	0	-2.60321e-14
chr21	14003591	14003675	14003671	blind	3	13159028	0	0	-2.60321e-14
chr21	14003998	14004024	14004002	non_blind	5	13159035	0	0	-2.60321e-14
chr21	14004521	14005153	14004525	non_blind	5	13159037	0	0	-2.60321e-14
chr21	14007514	14007558	14007518	non_blind	5	13159045	0	0	-2.60321e-14
chr21	14008232	14008461	14008236	blind	5	13159047	0	0	-2.60321e-14
chr21	14019372	14019431	14019427	non_blind	3	13159094	0	0	-2.60321e-14
chr21	14020066	14020176	14020172	blind	3	13159100	0	0	-2.60321e-14
chr21	14024783	14025352	14025348	non_blind	3	13159122	0	0	-2.60321e-14
chr21	14025349	14025478	14025353	non_blind	5	13159123	0	0	-2.60321e-14
chr21	14025840	14026207	14026203	non_blind	3	13159124	0	0	-2.60321e-14
chr21	14026214	14026349	14026345	non_blind	3	13159126	0	0	-2.60321e-14
chr21	14026346	14026480	14026350	blind	5	13159127	0	0	-2.60321e-14
chr21	14026935	14026968	14026964	non_blind	3	13159132	0	0	0.0847313
chr21	14032896	14032976	14032900	blind	5	13159161	0	0	0.0847313
chr21	14034937	14035032	14035028	non_blind	3	13159176	0	0	0.0847313
chr21	14035029	14035135	14035033	blind	5	13159177	0	0	0.0847313
chr21	14035029	14035135	14035131	blind	3	13159178	0	0	0.0847313
chr21	14035132	14035191	14035136	blind	5	13159179	0	0	0.0847313
chr21	14035132	14035191	14035187	blind	3	13159180	0	0	0.0847313
chr21	14035188	14035323	14035192	non_blind	5	13159181	0	0	0.0847313
chr21	14035877	14036231	14036227	non_blind	3	13159182	0	0	0.0847313
chr21	14036572	14036921	14036917	non_blind	3	13159184	0	0	0.0847313
chr21	14036918	14036975	14036922	non_blind	5	13159185	3	1.77936	0.0847313
chr21	14037615	14038087	14038083	non_blind	3	13159186	0	0	0.0847313
chr21	14039636	14039804	14039800	non_blind	3	13159188	0	0	0.0847313
chr21	14039801	14039873	14039805	non_blind	5	13159189	0	0	0.0847313
chr21	14040146	14040297	14040150	non_blind	5	13159191	0	0	0.0847313
chr21	14041782	14041841	14041786	blind	5	13159193	0	0	0.0847313
chr21	14042145	14042206	14042202	non_blind	3	13159196	0	0	0.0847313
chr21	14042203	14042301	14042207	blind	5	13159197	0	0	0.0847313
chr21	14042203	14042301	14042297	blind	3	13159198	0	0	0.0847313
chr21	14042321	14042709	14042705	non_blind	3	13159200	0	0	0.0847313
chr21	14043044	14043185	14043048	blind	5	13159203	0	0	0.141219
chr21	14043182	14043711	14043186	non_blind	5	13159205	0	0	0.0564875
chr21	14045076	14045827	14045080	non_blind	5	13159211	0	0	0.0564875
chr21	14045893	14046070	14046066	non_blind	3	13159212	0	0	0.0564875
chr21	14046067	14046109	14046071	non_blind	5	13159213	0	0	0.0564875
chr21	14046106	14046855	14046851	non_blind	3	13159214	0	0	0.0564875
chr21	14046852	14046975	14046971	blind	3	13159216	0	0	0.0564875
chr21	14047073	14047403	14047399	non_blind	3	13159218	0	0	0.0564875
chr21	14048298	14048423	14048302	blind	5	13159223	0	0	0.0564875
chr21	14048298	14048423	14048419	blind	3	13159224	0	0	0.0564875
chr21	14048420	14048444	14048424	non_blind	5	13159225	2	1.18624	0.0564875
chr21	14049087	14049171	14049167	non_blind	3	13159226	0	0	0.0564875
chr21	14049304	14049338	14049334	non_blind	3	13159228	0	0	0.0564875
chr21	14049335	14049708	14049339	blind	5	13159229	0	0	0.0564875
chr21	14050034	14050374	14050370	non_blind	3	13159232	0	0	0.0564875
chr21	14050371	14050518	14050375	blind	5	13159233	0	0	0.0564875
chr21	14050371	14050518	14050514	blind	3	13159234	0	0	0.0564875
chr21	14050515	14050679	14050519	blind	5	13159235	0	0	0.0564875
chr21	14050515	14050679	14050675	blind	3	13159236	0	0	0.0564875
chr21	14050873	14050938	14050877	non_blind	5	13159239	0	0	0.0564875
chr21	14051302	14051606	14051306	non_blind	5	13159243	0	0	0.0564875
chr21	14051673	14051715	14051711	non_blind	3	13159244	0	0	-2.60321e-14
chr21	14051712	14051853	14051716	blind	5	13159245	0	0	-2.60321e-14
chr21	14051850	14051954	14051950	blind	3	13159248	0	0	-2.60321e-14
chr21	14052984	14053020	14052988	non_blind	5	13159253	0	0	-2.60321e-14
chr21	14053143	14053180	14053147	non_blind	5	13159255	0	0	-2.60321e-14
chr21	14053628	14054056	14054052	non_blind	3	13159262	0	0	-2.60321e-14
chr21	14055627	14055713	14055709	non_blind	3	13159266	0	0	-2.60321e-14
chr21	14055710	14055778	14055714	non_blind	5	13159267	0	0	-2.60321e-14
chr21	14056721	14056859	14056855	non_blind	3	13159270	0	0	-2.60321e-14
chr21	14062251	14062375	14062371	non_blind	3	13159284	0	0	-2.60321e-14
chr21	14064144	14064161	14064148	blind	5	13159295	0	0	-2.60321e-14
chr21	14064144	14064161	14064157	blind	3	13159296	0	0	-2.60321e-14
chr21	14064432	14064769	14064436	non_blind	5	13159303	0	0	-2.60321e-14
chr21	14066218	14066472	14066222	non_blind	5	13159307	0	0	-2.60321e-14
chr21	14070179	14070249	14070183	non_blind	5	13159319	0	0	-2.60321e-14
chr21	14070649	14070778	14070774	non_blind	3	13159320	0	0	-2.60321e-14
chr21	14070775	14071826	14070779	non_blind	5	13159321	0	0	-2.60321e-14
chr21	14072819	14073196	14072823	non_blind	5	13159323	0	0	-2.60321e-14
chr21	14075056	14075124	14075120	non_blind	3	13159324	0	0	-2.60321e-14
chr21	14075438	14075505	14075501	non_blind	3	13159326	0	0	-2.60321e-14
chr21	14075505	14075567	14075563	non_blind	3	13159328	0	0	0.338925
chr21	14075564	14075721	14075568	non_blind	5	13159329	0	0	0.367169
chr21	14076300	14076671	14076304	non_blind	5	13159333	0	0	0.367169
chr21	14076688	14076857	14076853	non_blind	3	13159334	0	0	0.367169
chr21	14077482	14078746	14078742	non_blind	3	13159336	0	0	0.367169
chr21	14078743	14078976	14078747	non_blind	5	13159337	0	0	0.367169
chr21	14079861	14079905	14079865	blind	5	13159341	0	0	0.367169
chr21	14079960	14080343	14080339	non_blind	3	13159344	0	0	0.367169
chr21	14080340	14080389	14080344	non_blind	5	13159345	0	0	0.367169
chr21	14082045	14082130	14082126	blind	3	13159354	0	0	0.367169
chr21	14082127	14082245	14082131	non_blind	5	13159355	12	7.11743	0.367169
chr21	14082242	14082359	14082355	non_blind	3	13159356	1	0.593119	0.367169
chr21	14082356	14082495	14082360	blind	5	13159357	0	0	0.367169
chr21	14082356	14082495	14082491	blind	3	13159358	0	0	0.367169
chr21	14082492	14082737	14082496	non_blind	5	13159359	0	0	0.367169
chr21	14082805	14082928	14082924	non_blind	3	13159360	0	0	0.367169
chr21	14083618	14083741	14083737	non_blind	3	13159364	0	0	0.367169
chr21	14083738	14083802	14083742	blind	5	13159365	0	0	0.367169
chr21	14083799	14083872	14083803	non_blind	5	13159367	0	0	0.367169
chr21	14083916	14084041	14084037	non_blind	3	13159370	0	0	0.367169
chr21	14084038	14084174	14084042	non_blind	5	13159371	0	0	0.367169
chr21	14084590	14084682	14084678	non_blind	3	13159372	0	0	0.0282438
chr21	14086414	14086500	14086496	blind	3	13159388	0	0	0.0282438
chr21	14087236	14087350	14087346	blind	3	13159394	0	0	0.0282438
chr21	14087592	14087622	14087618	non_blind	3	13159400	0	0	0.0282438
chr21	14087619	14087842	14087623	blind	5	13159401	0	0	0.0282438
chr21	14089303	14089401	14089397	blind	3	13159412	0	0	0.0282438
chr21	14089398	14089578	14089402	blind	5	13159413	0	0	0.0282438
chr21	14089575	14089690	14089579	non_blind	5	13159415	0	0	0.0282438
chr21	14090141	14090208	14090204	non_blind	3	13159416	0	0	0.0282438
chr21	14091206	14091248	14091244	blind	3	13159422	0	0	0.0282438
chr21	14091245	14091317	14091313	blind	3	13159424	0	0	0.0282438
chr21	14091428	14091510	14091432	blind	5	13159427	1	0.593119	0.0282438
chr21	14091428	14091510	14091506	blind	3	13159428	0	0	0.0282438
chr21	14091726	14091766	14091762	non_blind	3	13159430	0	0	0.0282438
chr21	14091799	14092218	14091803	non_blind	5	13159433	0	0	0.0282438
chr21	14095645	14095822	14095818	non_blind	3	13159446	0	0	0.0282438
chr21	14095844	14095871	14095848	non_blind	5	13159449	0	0	0.0282438
chr21	14095967	14096196	14096192	non_blind	3	13159450	0	0	0.0282438
chr21	14096193	14096522	14096197	non_blind	5	13159451	0	0	0.0282438
chr21	14096519	14096627	14096623	non_blind	3	13159452	0	0	0.0282438
chr21	14096664	14096728	14096724	blind	3	13159456	0	0	0.0282438
chr21	14096747	14096951	14096947	non_blind	3	13159458	0	0	0.0282438
chr21	14096948	14097040	14096952	non_blind	5	13159459	0	0	-2.60321e-14
chr21	14097562	14097603	14097599	non_blind	3	13159466	0	0	-2.60321e-14
chr21	14098907	14099141	14099137	non_blind	3	13159472	0	0	-2.60321e-14
chr21	14099873	14099922	14099877	non_blind	5	13159475	0	0	-2.60321e-14
chr21	14100041	14100109	14100045	non_blind	5	13159477	0	0	-2.60321e-14
chr21	14100374	14100458	14100454	non_blind	3	13159486	0	0	-2.60321e-14
chr21	14101670	14101826	14101674	blind	5	13159495	0	0	-2.60321e-14
chr21	14101823	14101842	14101827	blind	5	13159497	0	0	-2.60321e-14
chr21	14101823	14101842	14101838	blind	3	13159498	0	0	-2.60321e-14
chr21	14101839	14101978	14101843	non_blind	5	13159499	0	0	-2.60321e-14
chr21	14102708	14103542	14102712	non_blind	5	13159501	0	0	-2.60321e-14
chr21	14104098	14104225	14104221	blind	3	13159508	0	0	-2.60321e-14
chr21	14105321	14105406	14105325	non_blind	5	13159513	0	0	-2.60321e-14
chr21	14107732	14108046	14108042	non_blind	3	13159522	0	0	-2.60321e-14
chr21	14108043	14108434	14108047	blind	5	13159523	0	0	-2.60321e-14
chr21	14108043	14108434	14108430	blind	3	13159524	0	0	-2.60321e-14
chr21	14108431	14109015	14108435	non_blind	5	13159525	0	0	-2.60321e-14
chr21	14109171	14109228	14109224	non_blind	3	13159526	0	0	-2.60321e-14
chr21	14109225	14109419	14109229	non_blind	5	13159527	0	0	-2.60321e-14
chr21	14109886	14110114	14110110	non_blind	3	13159528	0	0	-2.60321e-14
chr21	14110111	14110398	14110115	non_blind	5	13159529	0	0	-2.60321e-14
chr21	14110786	14110851	14110847	non_blind	3	13159532	0	0	-2.60321e-14
chr21	14112414	14112473	14112418	non_blind	5	13159537	0	0	-2.60321e-14
chr21	14112948	14113192	14113188	non_blind	3	13159538	0	0	-2.60321e-14
chr21	14113189	14113341	14113193	blind	5	13159539	0	0	-2.60321e-14
chr21	14113189	14113341	14113337	blind	3	13159540	0	0	-2.60321e-14
chr21	14113338	14113364	14113342	non_blind	5	13159541	0	0	-2.60321e-14
chr21	14113361	14113566	14113562	non_blind	3	13159542	0	0	-2.60321e-14
chr21	14113563	14113788	14113567	non_blind	5	13159543	0	0	-2.60321e-14
chr21	14113818	14113903	14113899	non_blind	3	13159544	0	0	-2.60321e-14
chr21	14115023	14115329	14115325	non_blind	3	13159552	0	0	-2.60321e-14
chr21	14115502	14115818	14115506	blind	5	13159557	0	0	-2.60321e-14
chr21	14115815	14116149	14115819	non_blind	5	13159559	0	0	-2.60321e-14
chr21	14116263	14116706	14116267	blind	5	13159561	0	0	-2.60321e-14
chr21	14116263	14116706	14116702	blind	3	13159562	0	0	-2.60321e-14
chr21	14117119	14117155	14117151	non_blind	3	13159564	0	0	-2.60321e-14
chr21	14117429	14117481	14117477	non_blind	3	13159566	0	0	-2.60321e-14
chr21	14117478	14117708	14117482	non_blind	5	13159567	0	0	-2.60321e-14
chr21	14118029	14118165	14118033	blind	5	13159571	0	0	-2.60321e-14
chr21	14118029	14118165	14118161	blind	3	13159572	0	0	-2.60321e-14
chr21	14118173	14118225	14118177	blind	5	13159575	0	0	-2.60321e-14
chr21	14118173	14118225	14118221	blind	3	13159576	0	0	-2.60321e-14
chr21	14118222	14118525	14118226	blind	5	13159577	0	0	-2.60321e-14
chr21	14118222	14118525	14118521	blind	3	13159578	0	0	-2.60321e-14
chr21	14118522	14118625	14118526	non_blind	5	13159579	0	0	-2.60321e-14
chr21	14118622	14118801	14118797	non_blind	3	13159580	0	0	-2.60321e-14
chr21	14118798	14118899	14118802	non_blind	5	13159581	0	0	-2.60321e-14
chr21	14119243	14119379	14119375	non_blind	3	13159582	0	0	-2.60321e-14
chr21	14119376	14119431	14119380	non_blind	5	13159583	0	0	-2.60321e-14
chr21	14119428	14119538	14119534	non_blind	3	13159584	0	0	-2.60321e-14
chr21	14119535	14119688	14119539	non_blind	5	13159585	0	0	-2.60321e-14
chr21	14120989	14121079	14121075	non_blind	3	13159588	0	0	-2.60321e-14
chr21	14121076	14121111	14121080	non_blind	5	13159589	0	0	-2.60321e-14
chr21	14121108	14121229	14121225	non_blind	3	13159590	0	0	-2.60321e-14
chr21	14121226	14121356	14121230	blind	5	13159591	0	0	0.0564875
chr21	14121682	14121730	14121726	non_blind	3	13159594	0	0	0.0564875
chr21	14121727	14121789	14121731	blind	5	13159595	0	0	0.0564875
chr21	14121727	14121789	14121785	blind	3	13159596	0	0	0.0564875
chr21	14121809	14121959	14121813	non_blind	5	13159601	0	0	0.0564875
chr21	14122053	14122122	14122118	non_blind	3	13159602	0	0	0.0564875
chr21	14122119	14122270	14122123	non_blind	5	13159603	0	0	0.0564875
chr21	14122311	14122338	14122334	non_blind	3	13159604	0	0	0.0564875
chr21	14122335	14122588	14122339	blind	5	13159605	0	0	0.0564875
chr21	14122335	14122588	14122584	blind	3	13159606	0	0	0.0564875
chr21	14122585	14122646	14122589	non_blind	5	13159607	2	1.18624	0.0564875
chr21	14122725	14122808	14122804	non_blind	3	13159608	0	0	0.0564875
chr21	14122805	14122908	14122809	blind	5	13159609	0	0	0.0564875
chr21	14123187	14123239	14123235	non_blind	3	13159614	0	0	0.0564875
chr21	14123236	14123406	14123240	blind	5	13159615	0	0	0.0564875
chr21	14123236	14123406	14123402	blind	3	13159616	0	0	0.0564875
chr21	14123403	14123704	14123407	blind	5	13159617	0	0	0.0564875
chr21	14123403	14123704	14123700	blind	3	13159618	0	0	0.0564875
chr21	14123729	14123772	14123768	non_blind	3	13159620	0	0	0.0564875
chr21	14123769	14123803	14123773	blind	5	13159621	0	0	0.0564875
chr21	14123769	14123803	14123799	blind	3	13159622	0	0	0.0564875
chr21	14123800	14123986	14123804	non_blind	5	13159623	0	0	-2.60321e-14
chr21	14124044	14124219	14124215	non_blind	3	13159624	0	0	-2.60321e-14
chr21	14124216	14124328	14124220	non_blind	5	13159625	0	0	-2.60321e-14
chr21	14124619	14124744	14124623	blind	5	13159627	0	0	-2.60321e-14
chr21	14125793	14125937	14125933	blind	3	13159636	0	0	-2.60321e-14
chr21	14125934	14125962	14125938	non_blind	5	13159637	0	0	-2.60321e-14
chr21	14126512	14126562	14126516	non_blind	5	13159639	0	0	-2.60321e-14
chr21	14127180	14127289	14127285	non_blind	3	13159640	0	0	-2.60321e-14
chr21	14127286	14127357	14127290	blind	5	13159641	0	0	-2.60321e-14
chr21	14127286	14127357	14127353	blind	3	13159642	0	0	-2.60321e-14
chr21	14127601	14127939	14127935	non_blind	3	13159644	0	0	-2.60321e-14
chr21	14127936	14128035	14127940	non_blind	5	13159645	0	0	-2.60321e-14
chr21	14128697	14128860	14128856	non_blind	3	13159646	0	0	-2.60321e-14
chr21	14128857	14128907	14128861	blind	5	13159647	0	0	-2.60321e-14
chr21	14128857	14128907	14128903	blind	3	13159648	0	0	-2.60321e-14
chr21	14128904	14129653	14128908	non_blind	5	13159649	0	0	-2.60321e-14
chr21	14129650	14130059	14130055	non_blind	3	13159650	0	0	-2.60321e-14
chr21	14130056	14130506	14130060	non_blind	5	13159651	0	0	-2.60321e-14
chr21	14130503	14130722	14130718	non_blind	3	13159652	0	0	-2.60321e-14
chr21	14130719	14130831	14130723	non_blind	5	13159653	0	0	-2.60321e-14
chr21	14130891	14131017	14130895	blind	5	13159655	0	0	-2.60321e-14
chr21	14131647	14131708	14131704	non_blind	3	13159664	0	0	-2.60321e-14
chr21	14131705	14132075	14131709	non_blind	5	13159665	0	0	-2.60321e-14
chr21	14132072	14132125	14132121	non_blind	3	13159666	0	0	-2.60321e-14
chr21	14132122	14132195	14132126	non_blind	5	13159667	0	0	-2.60321e-14
chr21	14132192	14132576	14132572	non_blind	3	13159668	0	0	-2.60321e-14
chr21	14132582	14132783	14132779	non_blind	3	13159670	0	0	-2.60321e-14
chr21	14132780	14132849	14132784	blind	5	13159671	0	0	-2.60321e-14
chr21	14133101	14133294	14133290	non_blind	3	13159674	0	0	-2.60321e-14
chr21	14133332	14133396	14133392	non_blind	3	13159676	0	0	-2.60321e-14
chr21	14133836	14134029	14133840	blind	5	13159679	0	0	-2.60321e-14
chr21	14134599	14134657	14134653	blind	3	13159688	0	0	-2.60321e-14
chr21	14135568	14135802	14135572	non_blind	5	13159691	0	0	-2.60321e-14
chr21	14136319	14136621	14136323	blind	5	13159693	0	0	-2.60321e-14
chr21	14136319	14136621	14136617	blind	3	13159694	0	0	-2.60321e-14
chr21	14136618	14136955	14136622	blind	5	13159695	0	0	-2.60321e-14
chr21	14136952	14137051	14137047	blind	3	13159698	0	0	-2.60321e-14
chr21	14137048	14137206	14137052	non_blind	5	13159699	0	0	-2.60321e-14
chr21	14137688	14137928	14137692	non_blind	5	13159703	0	0	-2.60321e-14
chr21	14138163	14138818	14138814	non_blind	3	13159704	0	0	-2.60321e-14
chr21	14138815	14139405	14138819	non_blind	5	13159705	0	0	-2.60321e-14
chr21	14139443	14139859	14139855	non_blind	3	13159706	0	0	-2.60321e-14
chr21	14139856	14139981	14139860	non_blind	5	13159707	0	0	-2.60321e-14
chr21	14140934	14141137	14141133	non_blind	3	13159708	0	0	-2.60321e-14
chr21	14141134	14141707	14141138	non_blind	5	13159709	0	0	-2.60321e-14
chr21	14142722	14142955	14142726	non_blind	5	13159711	0	0	-2.60321e-14
chr21	14143236	14143696	14143240	non_blind	5	13159713	0	0	-2.60321e-14
chr21	14143903	14144110	14144106	non_blind	3	13159714	0	0	-2.60321e-14
chr21	14144107	14144208	14144111	non_blind	5	13159715	0	0	-2.60321e-14
chr21	14145907	14146010	14145911	non_blind	5	13159719	0	0	-2.60321e-14
chr21	14147015	14147069	14147019	non_blind	5	13159721	0	0	-2.60321e-14
chr21	14147408	14147622	14147618	non_blind	3	13159722	0	0	-2.60321e-14
chr21	14147619	14147682	14147623	non_blind	5	13159723	0	0	-2.60321e-14
chr21	14147809	14147881	14147877	non_blind	3	13159724	0	0	-2.60321e-14
chr21	14147888	14148138	14148134	non_blind	3	13159726	0	0	-2.60321e-14
chr21	14148135	14148186	14148139	non_blind	5	13159727	0	0	-2.60321e-14
chr21	14148183	14148268	14148264	non_blind	3	13159728	0	0	-2.60321e-14
chr21	14148265	14148352	14148269	blind	5	13159729	0	0	-2.60321e-14
chr21	14148265	14148352	14148348	blind	3	13159730	0	0	-2.60321e-14
chr21	14148349	14148427	14148353	non_blind	5	13159731	0	0	-2.60321e-14
chr21	14149278	14149459	14149282	non_blind	5	13159733	0	0	-2.60321e-14
chr21	14149935	14150069	14149939	non_blind	5	13159737	0	0	-2.60321e-14
chr21	14150344	14150429	14150425	non_blind	3	13159738	0	0	-2.60321e-14
chr21	14150426	14150471	14150430	non_blind	5	13159739	0	0	-2.60321e-14
chr21	14150468	14150530	14150526	non_blind	3	13159740	0	0	-2.60321e-14
chr21	14150527	14150642	14150531	blind	5	13159741	0	0	-2.60321e-14
chr21	14150527	14150642	14150638	blind	3	13159742	0	0	-2.60321e-14
chr21	14152301	14152439	14152435	non_blind	3	13159744	0	0	-2.60321e-14
chr21	14152436	14152895	14152440	non_blind	5	13159745	0	0	-2.60321e-14
chr21	14152892	14152954	14152950	non_blind	3	13159746	0	0	-2.60321e-14
chr21	14152951	14153035	14152955	blind	5	13159747	0	0	-2.60321e-14
chr21	14152951	14153035	14153031	blind	3	13159748	0	0	-2.60321e-14
chr21	14153032	14153526	14153036	non_blind	5	13159749	0	0	-2.60321e-14
chr21	14154073	14154700	14154696	non_blind	3	13159750	0	0	-2.60321e-14
chr21	14154707	14154863	14154859	non_blind	3	13159752	0	0	-2.60321e-14
chr21	14154860	14154904	14154864	blind	5	13159753	0	0	0.141219
chr21	14154860	14154904	14154900	blind	3	13159754	0	0	0.141219
chr21	14154901	14155051	14154905	non_blind	5	13159755	0	0	0.141219
chr21	14155215	14155337	14155333	non_blind	3	13159756	0	0	0.141219
chr21	14155334	14155415	14155338	non_blind	5	13159757	0	0	0.141219
chr21	14157383	14157505	14157501	non_blind	3	13159758	0	0	0.141219
chr21	14157502	14157722	14157506	non_blind	5	13159759	0	0	0.141219
chr21	14157820	14158112	14158108	non_blind	3	13159760	0	0	0.141219
chr21	14158109	14158158	14158113	non_blind	5	13159761	0	0	0.141219
chr21	14158193	14158351	14158197	non_blind	5	13159763	0	0	0.141219
chr21	14158682	14159085	14159081	non_blind	3	13159764	5	2.96559	0.141219
chr21	14159082	14159407	14159086	blind	5	13159765	0	0	0.141219
chr21	14159082	14159407	14159403	blind	3	13159766	0	0	0.141219
chr21	14159404	14159640	14159408	non_blind	5	13159767	0	0	0.141219
chr21	14159637	14159825	14159821	non_blind	3	13159768	0	0	0.141219
chr21	14159822	14159938	14159826	blind	5	13159769	0	0	0.141219
chr21	14159822	14159938	14159934	blind	3	13159770	0	0	0.141219
chr21	14159935	14160015	14159939	non_blind	5	13159771	0	0	0.141219
chr21	14160031	14160167	14160163	non_blind	3	13159772	0	0	0.141219
chr21	14160177	14160641	14160637	non_blind	3	13159774	0	0	0.141219
chr21	14160638	14160683	14160642	non_blind	5	13159775	0	0	0.141219
chr21	14160680	14160740	14160736	non_blind	3	13159776	0	0	-2.60321e-14
chr21	14160737	14161006	14160741	blind	5	13159777	0	0	-2.60321e-14
chr21	14160737	14161006	14161002	blind	3	13159778	0	0	-2.60321e-14
chr21	14161003	14161423	14161007	non_blind	5	13159779	0	0	-2.60321e-14
chr21	14161420	14161485	14161481	non_blind	3	13159780	0	0	-2.60321e-14
chr21	14161482	14162085	14161486	blind	5	13159781	0	0	-2.60321e-14
chr21	14161482	14162085	14162081	blind	3	13159782	0	0	-2.60321e-14
chr21	14162082	14162175	14162086	non_blind	5	13159783	0	0	-2.60321e-14
chr21	14163131	14163255	14163251	non_blind	3	13159784	0	0	-2.60321e-14
chr21	14163252	14163318	14163256	non_blind	5	13159785	0	0	-2.60321e-14
chr21	14163315	14163606	14163602	non_blind	3	13159786	0	0	-2.60321e-14
chr21	14163603	14163631	14163607	blind	5	13159787	0	0	-2.60321e-14
chr21	14163603	14163631	14163627	blind	3	13159788	0	0	-2.60321e-14
chr21	14164367	14164465	14164461	non_blind	3	13159790	0	0	-2.60321e-14
chr21	14164462	14164560	14164466	non_blind	5	13159791	0	0	-2.60321e-14
chr21	14164598	14164779	14164602	non_blind	5	13159793	0	0	-2.60321e-14
chr21	14164818	14165016	14165012	non_blind	3	13159794	0	0	-2.60321e-14
chr21	14165750	14166043	14166039	non_blind	3	13159796	0	0	-2.60321e-14
chr21	14166040	14166075	14166044	non_blind	5	13159797	0	0	-2.60321e-14
chr21	14166884	14166939	14166935	non_blind	3	13159798	0	0	-2.60321e-14
chr21	14173051	14173238	14173234	non_blind	3	13159838	0	0	-2.60321e-14
chr21	14173245	14173374	14173249	non_blind	5	13159841	0	0	-2.60321e-14
chr21	14173371	14173418	14173414	non_blind	3	13159842	0	0	-2.60321e-14
chr21	14173415	14173611	14173419	non_blind	5	13159843	0	0	-2.60321e-14
chr21	14174213	14174267	14174263	non_blind	3	13159844	0	0	-2.60321e-14
chr21	14174264	14174351	14174268	non_blind	5	13159845	0	0	-2.60321e-14
chr21	14174633	14174703	14174637	non_blind	5	13159849	0	0	-2.60321e-14
chr21	14177039	14177606	14177043	non_blind	5	13159859	0	0	-2.60321e-14
chr21	14179392	14179439	14179396	blind	5	13159861	0	0	-2.60321e-14
chr21	14179392	14179439	14179435	blind	3	13159862	0	0	-2.60321e-14
chr21	14179436	14180061	14179440	blind	5	13159863	0	0	-2.60321e-14
chr21	14179436	14180061	14180057	blind	3	13159864	0	0	-2.60321e-14
chr21	14180786	14180858	14180854	non_blind	3	13159868	0	0	-2.60321e-14
chr21	14180855	14181438	14180859	non_blind	5	13159869	0	0	-2.60321e-14
chr21	14181450	14181479	14181454	non_blind	5	13159871	0	0	-2.60321e-14
chr21	14186309	14186520	14186516	non_blind	3	13159884	0	0	-2.60321e-14
chr21	14186517	14186721	14186521	non_blind	5	13159885	0	0	-2.60321e-14
chr21	14186735	14186777	14186773	non_blind	3	13159886	0	0	-2.60321e-14
chr21	14186774	14186798	14186778	non_blind	5	13159887	0	0	-2.60321e-14
chr21	14186795	14187036	14187032	non_blind	3	13159888	0	0	-2.60321e-14
chr21	14187033	14187145	14187037	blind	5	13159889	0	0	-2.60321e-14
chr21	14187033	14187145	14187141	blind	3	13159890	0	0	-2.60321e-14
chr21	14187142	14187238	14187146	non_blind	5	13159891	0	0	-2.60321e-14
chr21	14187235	14187293	14187289	non_blind	3	13159892	0	0	-2.60321e-14
chr21	14187421	14187760	14187756	non_blind	3	13159894	0	0	-2.60321e-14
chr21	14187757	14187839	14187761	non_blind	5	13159895	0	0	-2.60321e-14
chr21	14188140	14188220	14188144	blind	5	13159897	0	0	-2.60321e-14
chr21	14188140	14188220	14188216	blind	3	13159898	0	0	-2.60321e-14
chr21	14188217	14188347	14188221	blind	5	13159899	0	0	-2.60321e-14
chr21	14189923	14189962	14189927	non_blind	5	13159905	0	0	-2.60321e-14
chr21	14190766	14190947	14190943	non_blind	3	13159906	0	0	-2.60321e-14
chr21	14190944	14191107	14190948	non_blind	5	13159907	0	0	-2.60321e-14
chr21	14194353	14194591	14194587	non_blind	3	13159916	0	0	-2.60321e-14
chr21	14194588	14194741	14194737	blind	3	13159918	0	0	-2.60321e-14
chr21	14194761	14195248	14195244	non_blind	3	13159920	0	0	-2.60321e-14
chr21	14195245	14195269	14195249	blind	5	13159921	0	0	-2.60321e-14
chr21	14195245	14195269	14195265	blind	3	13159922	0	0	-2.60321e-14
chr21	14195279	14195406	14195402	non_blind	3	13159924	0	0	-2.60321e-14
chr21	14195403	14195625	14195407	non_blind	5	13159925	0	0	-2.60321e-14
chr21	14198141	14198241	14198145	non_blind	5	13159933	0	0	-2.60321e-14
chr21	14198633	14198744	14198637	blind	5	13159935	0	0	-2.60321e-14
chr21	14199150	14199293	14199289	blind	3	13159940	0	0	-2.60321e-14
chr21	14200897	14200982	14200901	blind	5	13159947	0	0	-2.60321e-14
chr21	14200897	14200982	14200978	blind	3	13159948	0	0	-2.60321e-14
chr21	14203920	14204007	14203924	non_blind	5	13159967	0	0	-2.60321e-14
chr21	14204780	14204837	14204833	non_blind	3	13159968	0	0	-2.60321e-14
chr21	14204834	14205276	14204838	non_blind	5	13159969	0	0	-2.60321e-14
chr21	14205525	14205868	14205864	non_blind	3	13159970	0	0	-2.60321e-14
chr21	14205865	14206071	14205869	non_blind	5	13159971	0	0	-2.60321e-14
chr21	14206733	14206820	14206816	non_blind	3	13159972	0	0	-2.60321e-14
chr21	14206817	14206875	14206821	non_blind	5	13159973	0	0	-2.60321e-14
chr21	14206965	14207372	14207368	non_blind	3	13159974	0	0	-2.60321e-14
chr21	14207369	14207580	14207576	blind	3	13159976	0	0	-2.60321e-14
chr21	14207577	14207729	14207581	non_blind	5	13159977	0	0	-2.60321e-14
chr21	14208009	14208098	14208013	blind	5	13159979	0	0	-2.60321e-14
chr21	14208009	14208098	14208094	blind	3	13159980	0	0	-2.60321e-14
chr21	14208095	14208171	14208099	non_blind	5	13159981	0	0	-2.60321e-14
chr21	14208999	14209223	14209219	non_blind	3	13159984	0	0	-2.60321e-14
chr21	14209220	14209335	14209224	non_blind	5	13159985	0	0	-2.60321e-14
chr21	14209508	14209534	14209530	non_blind	3	13159986	0	0	-2.60321e-14
chr21	14209531	14210621	14209535	non_blind	5	13159987	0	0	-2.60321e-14
chr21	14210618	14210805	14210801	non_blind	3	13159988	0	0	-2.60321e-14
chr21	14210802	14210930	14210806	blind	5	13159989	0	0	-2.60321e-14
chr21	14210802	14210930	14210926	blind	3	13159990	0	0	-2.60321e-14
chr21	14210927	14211492	14210931	non_blind	5	13159991	0	0	-2.60321e-14
chr21	14211489	14211797	14211793	non_blind	3	13159992	0	0	-2.60321e-14
chr21	14211794	14211814	14211798	non_blind	5	13159993	0	0	-2.60321e-14
chr21	14212705	14212847	14212843	non_blind	3	13159994	0	0	-2.60321e-14
chr21	14212844	14212944	14212848	non_blind	5	13159995	0	0	-2.60321e-14
chr21	14214284	14214317	14214313	non_blind	3	13159998	0	0	-2.60321e-14
chr21	14214314	14214552	14214318	non_blind	5	13159999	0	0	-2.60321e-14
chr21	14214549	14214719	14214715	non_blind	3	13160000	0	0	-2.60321e-14
chr21	14214716	14215094	14214720	blind	5	13160001	0	0	-2.60321e-14
chr21	14214716	14215094	14215090	blind	3	13160002	0	0	-2.60321e-14
chr21	14215091	14215179	14215095	non_blind	5	13160003	0	0	-2.60321e-14
chr21	14215176	14215243	14215239	non_blind	3	13160004	0	0	-2.60321e-14
chr21	14215240	14215261	14215244	non_blind	5	13160005	0	0	-2.60321e-14
chr21	14215266	14215499	14215270	blind	5	13160007	0	0	-2.60321e-14
chr21	14215266	14215499	14215495	blind	3	13160008	0	0	-2.60321e-14
chr21	14215496	14215709	14215500	non_blind	5	13160009	0	0	0.141219
chr21	14216731	14216847	14216843	non_blind	3	13160010	0	0	0.141219
chr21	14216844	14216975	14216848	blind	5	13160011	0	0	0.141219
chr21	14216844	14216975	14216971	blind	3	13160012	0	0	0.141219
chr21	14216972	14217890	14216976	blind	5	13160013	0	0	0.141219
chr21	14216972	14217890	14217886	blind	3	13160014	0	0	0.141219
chr21	14217887	14217909	14217891	blind	5	13160015	0	0	0.141219
chr21	14217887	14217909	14217905	blind	3	13160016	0	0	0.141219
chr21	14217906	14217990	14217910	blind	5	13160017	0	0	0.141219
chr21	14217906	14217990	14217986	blind	3	13160018	0	0	0.141219
chr21	14217987	14218172	14217991	non_blind	5	13160019	5	2.96559	0.141219
chr21	14218507	14218641	14218637	non_blind	3	13160020	0	0	0.141219
chr21	14218638	14218783	14218642	non_blind	5	13160021	0	0	0.141219
chr21	14220165	14220302	14220298	non_blind	3	13160022	0	0	0.141219
chr21	14221461	14221724	14221465	non_blind	5	13160025	0	0	0.141219
chr21	14222125	14222228	14222224	non_blind	3	13160026	0	0	0.141219
chr21	14222225	14222287	14222229	blind	5	13160027	0	0	0.141219
chr21	14222225	14222287	14222283	blind	3	13160028	0	0	0.141219
chr21	14222284	14222660	14222288	non_blind	5	13160029	0	0	0.141219
chr21	14223537	14223601	14223597	non_blind	3	13160030	0	0	0.141219
chr21	14223760	14223837	14223833	non_blind	3	13160032	0	0	0.141219
chr21	14223898	14223964	14223960	non_blind	3	13160034	0	0	-2.60321e-14
chr21	14223961	14223991	14223965	non_blind	5	13160035	0	0	-2.60321e-14
chr21	14224312	14224464	14224460	non_blind	3	13160036	0	0	-2.60321e-14
chr21	14226045	14226097	14226093	non_blind	3	13160040	0	0	-2.60321e-14
chr21	14227108	14227327	14227323	blind	3	13160048	0	0	-2.60321e-14
chr21	14227324	14227382	14227328	non_blind	5	13160049	0	0	-2.60321e-14
chr21	14227896	14228052	14227900	non_blind	5	13160051	0	0	-2.60321e-14
chr21	14228743	14229077	14229073	non_blind	3	13160056	0	0	-2.60321e-14
chr21	14229210	14229232	14229228	non_blind	3	13160058	0	0	-2.60321e-14
chr21	14230980	14231028	14231024	non_blind	3	13160068	0	0	-2.60321e-14
chr21	14231025	14231199	14231029	non_blind	5	13160069	0	0	-2.60321e-14
chr21	14232325	14232494	14232490	non_blind	3	13160070	0	0	-2.60321e-14
chr21	14232491	14232918	14232495	non_blind	5	13160071	0	0	-2.60321e-14
chr21	14232921	14233136	14233132	non_blind	3	13160072	0	0	-2.60321e-14
chr21	14233133	14233256	14233137	blind	5	13160073	0	0	-2.60321e-14
chr21	14233133	14233256	14233252	blind	3	13160074	0	0	-2.60321e-14
chr21	14233253	14233492	14233257	non_blind	5	13160075	0	0	-2.60321e-14
chr21	14234059	14234451	14234447	non_blind	3	13160076	0	0	-2.60321e-14
chr21	14234448	14234678	14234452	non_blind	5	13160077	0	0	-2.60321e-14
chr21	14234675	14235057	14235053	non_blind	3	13160078	0	0	-2.60321e-14
chr21	14235398	14235439	14235402	non_blind	5	13160085	0	0	-2.60321e-14
chr21	14235436	14235569	14235565	non_blind	3	13160086	0	0	-2.60321e-14
chr21	14235566	14235742	14235570	non_blind	5	13160087	0	0	-2.60321e-14
chr21	14235739	14236050	14236046	non_blind	3	13160088	0	0	-2.60321e-14
chr21	14237233	14237257	14237253	non_blind	3	13160090	0	0	-2.60321e-14
chr21	14237254	14237277	14237258	blind	5	13160091	0	0	-2.60321e-14
chr21	14237254	14237277	14237273	blind	3	13160092	0	0	-2.60321e-14
chr21	14237274	14237430	14237278	blind	5	13160093	0	0	-2.60321e-14
chr21	14237274	14237430	14237426	blind	3	13160094	0	0	-2.60321e-14
chr21	14237427	14237449	14237431	non_blind	5	13160095	0	0	-2.60321e-14
chr21	14237446	14237501	14237497	non_blind	3	13160096	0	0	-2.60321e-14
chr21	14237498	14237623	14237502	blind	5	13160097	0	0	-2.60321e-14
chr21	14237498	14237623	14237619	blind	3	13160098	0	0	-2.60321e-14
chr21	14237620	14238077	14237624	blind	5	13160099	0	0	-2.60321e-14
chr21	14237620	14238077	14238073	blind	3	13160100	0	0	-2.60321e-14
chr21	14238074	14238267	14238078	blind	5	13160101	0	0	-2.60321e-14
chr21	14238074	14238267	14238263	blind	3	13160102	0	0	-2.60321e-14
chr21	14238264	14238949	14238268	non_blind	5	13160103	0	0	-2.60321e-14
chr21	14239026	14239059	14239055	non_blind	3	13160104	0	0	-2.60321e-14
chr21	14239056	14239122	14239060	non_blind	5	13160105	0	0	-2.60321e-14
chr21	14239297	14239424	14239420	non_blind	3	13160106	0	0	-2.60321e-14
chr21	14239421	14239439	14239425	blind	5	13160107	0	0	-2.60321e-14
chr21	14239421	14239439	14239435	blind	3	13160108	0	0	-2.60321e-14
chr21	14239436	14239750	14239440	non_blind	5	13160109	0	0	-2.60321e-14
chr21	14240045	14240501	14240497	non_blind	3	13160110	0	0	-2.60321e-14
chr21	14240498	14240992	14240502	non_blind	5	13160111	0	0	-2.60321e-14
chr21	14241384	14241450	14241446	non_blind	3	13160112	0	0	-2.60321e-14
chr21	14241447	14241518	14241451	blind	5	13160113	0	0	-2.60321e-14
chr21	14242390	14242531	14242527	blind	3	13160120	0	0	-2.60321e-14
chr21	14243018	14243074	14243070	non_blind	3	13160124	0	0	-2.60321e-14
chr21	14243071	14243111	14243075	non_blind	5	13160125	0	0	-2.60321e-14
chr21	14243165	14243222	14243218	non_blind	3	13160126	0	0	-2.60321e-14
chr21	14243219	14243285	14243281	blind	3	13160128	0	0	-2.60321e-14
chr21	14243282	14243378	14243286	non_blind	5	13160129	0	0	-2.60321e-14
chr21	14243375	14244020	14244016	non_blind	3	13160130	0	0	-2.60321e-14
chr21	14244085	14244390	14244386	non_blind	3	13160132	0	0	-2.60321e-14
chr21	14244387	14244466	14244391	non_blind	5	13160133	0	0	-2.60321e-14
chr21	14244782	14244866	14244862	non_blind	3	13160134	0	0	-2.60321e-14
chr21	14244863	14244901	14244867	non_blind	5	13160135	0	0	-2.60321e-14
chr21	14246117	14246255	14246251	non_blind	3	13160136	0	0	-2.60321e-14
chr21	14246252	14246622	14246256	blind	5	13160137	0	0	-2.60321e-14
chr21	14246252	14246622	14246618	blind	3	13160138	0	0	-2.60321e-14
chr21	14246700	14246794	14246790	non_blind	3	13160140	0	0	-2.60321e-14
chr21	14246791	14246812	14246795	blind	5	13160141	0	0	-2.60321e-14
chr21	14246791	14246812	14246808	blind	3	13160142	0	0	-2.60321e-14
chr21	14246809	14247027	14246813	blind	5	13160143	0	0	-2.60321e-14
chr21	14246809	14247027	14247023	blind	3	13160144	0	0	-2.60321e-14
chr21	14247027	14247279	14247275	non_blind	3	13160146	0	0	-2.60321e-14
chr21	14247276	14247746	14247280	non_blind	5	13160147	0	0	-2.60321e-14
chr21	14247771	14247836	14247832	non_blind	3	13160148	0	0	-2.60321e-14
chr21	14247833	14247907	14247837	non_blind	5	13160149	0	0	-2.60321e-14
chr21	14248642	14248670	14248646	non_blind	5	13160153	0	0	-2.60321e-14
chr21	14248857	14248886	14248882	non_blind	3	13160154	0	0	-2.60321e-14
chr21	14248883	14249050	14248887	non_blind	5	13160155	0	0	-2.60321e-14
chr21	14249937	14249966	14249941	blind	5	13160157	0	0	-2.60321e-14
chr21	14249937	14249966	14249962	blind	3	13160158	0	0	-2.60321e-14
chr21	14250526	14250609	14250605	non_blind	3	13160164	0	0	-2.60321e-14
chr21	14250606	14250684	14250610	non_blind	5	13160165	0	0	-2.60321e-14
chr21	14251300	14251352	14251348	non_blind	3	13160166	0	0	0.0564875
chr21	14251349	14251492	14251353	non_blind	5	13160167	0	0	0.0564875
chr21	14252101	14252572	14252568	non_blind	3	13160168	0	0	0.0564875
chr21	14252569	14252608	14252573	non_blind	5	13160169	0	0	0.0564875
chr21	14252821	14253315	14253311	non_blind	3	13160170	0	0	0.0564875
chr21	14253312	14253923	14253316	non_blind	5	13160171	0	0	0.0564875
chr21	14254296	14254328	14254324	non_blind	3	13160172	0	0	0.0564875
chr21	14254325	14254523	14254329	non_blind	5	13160173	0	0	0.0564875
chr21	14254520	14254775	14254771	non_blind	3	13160174	0	0	0.0564875
chr21	14254772	14254799	14254776	blind	5	13160175	0	0	0.0564875
chr21	14254772	14254799	14254795	blind	3	13160176	2	1.18624	0.0564875
chr21	14254796	14254838	14254800	blind	5	13160177	0	0	0.0564875
chr21	14254796	14254838	14254834	blind	3	13160178	0	0	0.0564875
chr21	14254835	14254883	14254839	blind	5	13160179	0	0	0.0564875
chr21	14254835	14254883	14254879	blind	3	13160180	0	0	0.0564875
chr21	14254880	14255168	14254884	non_blind	5	13160181	0	0	0.0564875
chr21	14255448	14255484	14255452	non_blind	5	13160183	0	0	0.0564875
chr21	14256951	14257180	14257176	non_blind	3	13160192	0	0	0.0564875
chr21	14257177	14257378	14257181	blind	5	13160193	0	0	0.0564875
chr21	14257177	14257378	14257374	blind	3	13160194	0	0	0.0564875
chr21	14257375	14257539	14257379	blind	5	13160195	0	0	0.0564875
chr21	14257375	14257539	14257535	blind	3	13160196	0	0	-2.60321e-14
chr21	14257536	14257852	14257540	non_blind	5	13160197	0	0	-2.60321e-14
chr21	14258170	14258404	14258400	blind	3	13160200	0	0	-2.60321e-14
chr21	14258401	14258703	14258405	non_blind	5	13160201	0	0	-2.60321e-14
chr21	14258700	14258735	14258731	non_blind	3	13160202	0	0	-2.60321e-14
chr21	14258950	14259624	14259620	non_blind	3	13160206	0	0	-2.60321e-14
chr21	14259621	14259723	14259625	non_blind	5	13160207	0	0	-2.60321e-14
chr21	14260186	14260340	14260336	non_blind	3	13160208	0	0	-2.60321e-14
chr21	14260337	14260554	14260341	blind	5	13160209	0	0	-2.60321e-14
chr21	14260337	14260554	14260550	blind	3	13160210	0	0	-2.60321e-14
chr21	14260551	14260657	14260555	non_blind	5	13160211	0	0	-2.60321e-14
chr21	14262739	14262773	14262769	non_blind	3	13160212	0	0	-2.60321e-14
chr21	14262770	14262858	14262774	non_blind	5	13160213	0	0	-2.60321e-14
chr21	14262964	14263318	14263314	non_blind	3	13160214	0	0	-2.60321e-14
chr21	14263315	14263428	14263319	non_blind	5	13160215	0	0	-2.60321e-14
chr21	14263425	14263567	14263563	non_blind	3	13160216	0	0	-2.60321e-14
chr21	14263564	14263694	14263568	blind	5	13160217	0	0	-2.60321e-14
chr21	14263564	14263694	14263690	blind	3	13160218	0	0	-2.60321e-14
chr21	14263691	14263895	14263695	non_blind	5	13160219	0	0	-2.60321e-14
chr21	14265064	14265216	14265212	non_blind	3	13160220	0	0	-2.60321e-14
chr21	14265213	14265269	14265217	non_blind	5	13160221	0	0	-2.60321e-14
chr21	14265712	14265782	14265778	non_blind	3	13160224	0	0	-2.60321e-14
chr21	14265779	14265876	14265783	non_blind	5	13160225	0	0	-2.60321e-14
chr21	14266177	14266346	14266342	non_blind	3	13160226	0	0	-2.60321e-14
chr21	14266343	14266500	14266347	blind	5	13160227	0	0	-2.60321e-14
chr21	14266343	14266500	14266496	blind	3	13160228	0	0	-2.60321e-14
chr21	14266497	14266612	14266501	non_blind	5	13160229	0	0	-2.60321e-14
chr21	14266609	14266850	14266846	non_blind	3	13160230	0	0	0.0282438
chr21	14266847	14266927	14266851	non_blind	5	13160231	0	0	0.0282438
chr21	14267093	14267419	14267415	non_blind	3	13160232	0	0	0.0282438
chr21	14267416	14267465	14267420	non_blind	5	13160233	0	0	0.0282438
chr21	14267572	14267831	14267827	non_blind	3	13160234	0	0	0.0282438
chr21	14267828	14268003	14267832	non_blind	5	13160235	0	0	0.0282438
chr21	14268917	14268996	14268921	blind	5	13160237	0	0	0.0282438
chr21	14269030	14269332	14269328	non_blind	3	13160242	0	0	3.89764
chr21	14269329	14269385	14269333	non_blind	5	13160243	0	0	3.89764
chr21	14269680	14269766	14269762	non_blind	3	13160244	0	0	3.89764
chr21	14269763	14269837	14269767	non_blind	5	13160245	1	0.593119	3.89764
chr21	14269834	14269880	14269876	non_blind	3	13160246	0	0	3.89764
chr21	14270195	14270299	14270199	non_blind	5	13160251	0	0	3.89764
chr21	14270737	14270758	14270754	non_blind	3	13160252	0	0	3.89764
chr21	14270755	14270929	14270759	non_blind	5	13160253	0	0	3.89764
chr21	14271021	14271180	14271176	non_blind	3	13160254	0	0	3.89764
chr21	14271177	14271297	14271181	non_blind	5	13160255	0	0	3.89764
chr21	14271963	14272075	14272071	non_blind	3	13160256	137	81.2573	3.89764
chr21	14272072	14272179	14272076	non_blind	5	13160257	0	0	3.89764
chr21	14274091	14274343	14274339	non_blind	3	13160258	0	0	3.89764
chr21	14274347	14274523	14274351	blind	5	13160261	0	0	3.89764
chr21	14274347	14274523	14274519	blind	3	13160262	0	0	3.86939
chr21	14274520	14274648	14274524	non_blind	5	13160263	0	0	3.86939
chr21	14274773	14274901	14274897	non_blind	3	13160264	0	0	3.86939
chr21	14274898	14275030	14274902	non_blind	5	13160265	0	0	3.86939
chr21	14275027	14275112	14275108	non_blind	3	13160266	0	0	3.86939
chr21	14275109	14275254	14275113	blind	5	13160267	0	0	3.86939
chr21	14275109	14275254	14275250	blind	3	13160268	0	0	3.86939
chr21	14275251	14275403	14275255	non_blind	5	13160269	0	0	-2.57149e-14
chr21	14275491	14275625	14275621	non_blind	3	13160270	0	0	-2.57149e-14
chr21	14275622	14275696	14275626	non_blind	5	13160271	0	0	-2.57149e-14
chr21	14276170	14276235	14276231	non_blind	3	13160272	0	0	-2.57149e-14
chr21	14276232	14276262	14276236	blind	5	13160273	0	0	-2.57149e-14
chr21	14276232	14276262	14276258	blind	3	13160274	0	0	-2.57149e-14
chr21	14276259	14276436	14276263	non_blind	5	13160275	0	0	-2.57149e-14
chr21	14276433	14276484	14276480	non_blind	3	13160276	0	0	-2.57149e-14
chr21	14276904	14276980	14276976	non_blind	3	13160278	0	0	-2.57149e-14
chr21	14276977	14277162	14276981	non_blind	5	13160279	0	0	-2.57149e-14
chr21	14277314	14277374	14277370	non_blind	3	13160280	0	0	-2.57149e-14
chr21	14277988	14278030	14277992	non_blind	5	13160283	0	0	-2.57149e-14
chr21	14278027	14278260	14278256	non_blind	3	13160284	0	0	-2.57149e-14
chr21	14278257	14278742	14278261	blind	5	13160285	0	0	-2.57149e-14
chr21	14278257	14278742	14278738	blind	3	13160286	0	0	-2.57149e-14
chr21	14278739	14279362	14278743	non_blind	5	13160287	0	0	-2.57149e-14
chr21	14279506	14279705	14279701	non_blind	3	13160288	0	0	-2.57149e-14
chr21	14279702	14279999	14279706	non_blind	5	13160289	0	0	-2.57149e-14
chr21	14281890	14281930	14281894	non_blind	5	13160295	0	0	-2.57149e-14
chr21	14282324	14282895	14282328	blind	5	13160297	0	0	-2.57149e-14
chr21	14283343	14283609	14283347	blind	5	13160301	0	0	-2.57149e-14
chr21	14283343	14283609	14283605	blind	3	13160302	0	0	-2.57149e-14
chr21	14283618	14283680	14283622	non_blind	5	13160305	0	0	-2.57149e-14
chr21	14284136	14284314	14284140	non_blind	5	13160311	0	0	-2.57149e-14
chr21	14285202	14285290	14285206	non_blind	5	13160315	0	0	-2.57149e-14
chr21	14286534	14286681	14286677	non_blind	3	13160316	0	0	-2.57149e-14
chr21	14286678	14286725	14286682	non_blind	5	13160317	0	0	-2.57149e-14
chr21	14286722	14286761	14286757	non_blind	3	13160318	0	0	-2.57149e-14
chr21	14286758	14287593	14286762	blind	5	13160319	0	0	-2.57149e-14
chr21	14286758	14287593	14287589	blind	3	13160320	0	0	-2.57149e-14
chr21	14287590	14287927	14287594	non_blind	5	13160321	0	0	-2.57149e-14
chr21	14288674	14289103	14289099	non_blind	3	13160322	0	0	-2.57149e-14
chr21	14289504	14289703	14289699	non_blind	3	13160324	0	0	-2.57149e-14
chr21	14289700	14289861	14289704	non_blind	5	13160325	0	0	-2.57149e-14
chr21	14289858	14289892	14289888	non_blind	3	13160326	0	0	0.0564875
chr21	14289889	14289946	14289893	non_blind	5	13160327	0	0	0.0564875
chr21	14290270	14290466	14290462	non_blind	3	13160328	0	0	0.0564875
chr21	14290463	14290750	14290467	blind	5	13160329	0	0	0.0847313
chr21	14290463	14290750	14290746	blind	3	13160330	0	0	0.0847313
chr21	14290747	14290824	14290751	non_blind	5	13160331	0	0	0.0847313
chr21	14290892	14291040	14291036	non_blind	3	13160332	0	0	0.0847313
chr21	14291119	14291179	14291175	non_blind	3	13160334	0	0	0.0847313
chr21	14291176	14291204	14291180	non_blind	5	13160335	0	0	0.0847313
chr21	14291693	14291738	14291734	non_blind	3	13160336	0	0	0.0847313
chr21	14291735	14291934	14291739	non_blind	5	13160337	2	1.18624	0.0847313
chr21	14292069	14292253	14292249	non_blind	3	13160338	0	0	0.0847313
chr21	14292250	14292317	14292254	non_blind	5	13160339	0	0	0.0847313
chr21	14292615	14292648	14292644	non_blind	3	13160340	1	0.593119	0.0847313
chr21	14292645	14292809	14292649	blind	5	13160341	0	0	0.0847313
chr21	14292645	14292809	14292805	blind	3	13160342	0	0	0.0847313
chr21	14292806	14292831	14292810	non_blind	5	13160343	0	0	0.0847313
chr21	14292828	14292848	14292844	non_blind	3	13160344	0	0	0.0847313
chr21	14292845	14293081	14292849	non_blind	5	13160345	0	0	0.0847313
chr21	14293146	14293189	14293185	non_blind	3	13160346	0	0	0.0847313
chr21	14293186	14293404	14293190	non_blind	5	13160347	0	0	0.112975
chr21	14293401	14293638	14293634	non_blind	3	13160348	0	0	0.0564875
chr21	14293635	14293705	14293701	blind	3	13160350	0	0	0.0564875
chr21	14293702	14293723	14293706	blind	5	13160351	0	0	0.0564875
chr21	14293702	14293723	14293719	blind	3	13160352	0	0	0.0282438
chr21	14293720	14293758	14293724	non_blind	5	13160353	0	0	0.0282438
chr21	14294059	14294250	14294246	non_blind	3	13160354	0	0	0.0282438
chr21	14294247	14294333	14294251	non_blind	5	13160355	0	0	0.0282438
chr21	14294958	14295000	14294996	non_blind	3	13160362	0	0	0.0282438
chr21	14294997	14295049	14295001	non_blind	5	13160363	0	0	0.0282438
chr21	14295077	14295131	14295127	non_blind	3	13160364	1	0.593119	0.0282438
chr21	14295189	14295239	14295193	non_blind	5	13160367	0	0	0.0282438
chr21	14295330	14295349	14295345	non_blind	3	13160368	0	0	0.0282438
chr21	14295550	14296166	14296162	non_blind	3	13160370	0	0	0.0282438
chr21	14296163	14296254	14296167	non_blind	5	13160371	0	0	0.0282438
chr21	14296302	14296554	14296550	non_blind	3	13160372	0	0	0.0282438
chr21	14296551	14296653	14296555	non_blind	5	13160373	0	0	0.0282438
chr21	14297674	14297754	14297750	non_blind	3	13160376	0	0	0.0282438
chr21	14297751	14297895	14297755	non_blind	5	13160377	0	0	0.0282438
chr21	14299913	14300040	14300036	non_blind	3	13160382	0	0	0.0282438
chr21	14300037	14300143	14300041	non_blind	5	13160383	0	0	0.0282438
chr21	14300291	14300456	14300452	non_blind	3	13160384	0	0	-2.57149e-14
chr21	14300453	14300482	14300457	non_blind	5	13160385	0	0	-2.57149e-14
chr21	14300530	14300567	14300563	non_blind	3	13160386	0	0	-2.57149e-14
chr21	14300564	14300600	14300568	non_blind	5	13160387	0	0	-2.57149e-14
chr21	14302129	14302168	14302164	non_blind	3	13160388	0	0	-2.57149e-14
chr21	14302165	14302526	14302169	blind	5	13160389	0	0	-2.57149e-14
chr21	14302165	14302526	14302522	blind	3	13160390	0	0	-2.57149e-14
chr21	14302523	14302737	14302527	non_blind	5	13160391	0	0	-2.57149e-14
chr21	14303510	14303684	14303680	blind	3	13160398	0	0	-2.57149e-14
chr21	14303681	14304199	14303685	blind	5	13160399	0	0	-2.57149e-14
chr21	14303681	14304199	14304195	blind	3	13160400	0	0	-2.57149e-14
chr21	14304196	14304225	14304200	blind	5	13160401	0	0	-2.57149e-14
chr21	14304196	14304225	14304221	blind	3	13160402	0	0	-2.57149e-14
chr21	14304222	14304242	14304226	non_blind	5	13160403	0	0	-2.57149e-14
chr21	14304239	14304283	14304279	non_blind	3	13160404	0	0	-2.57149e-14
chr21	14304280	14304333	14304284	non_blind	5	13160405	0	0	-2.57149e-14
chr21	14305529	14305827	14305823	non_blind	3	13160406	0	0	-2.57149e-14
chr21	14305824	14306028	14305828	non_blind	5	13160407	0	0	-2.57149e-14
chr21	14306025	14306221	14306217	non_blind	3	13160408	0	0	-2.57149e-14
chr21	14306218	14306441	14306222	blind	5	13160409	0	0	-2.57149e-14
chr21	14306218	14306441	14306437	blind	3	13160410	0	0	-2.57149e-14
chr21	14306438	14306667	14306442	non_blind	5	13160411	0	0	-2.57149e-14
chr21	14306664	14307197	14307193	non_blind	3	13160412	0	0	-2.57149e-14
chr21	14307194	14307496	14307198	non_blind	5	13160413	0	0	-2.57149e-14
chr21	14307599	14307774	14307770	non_blind	3	13160414	0	0	-2.57149e-14
chr21	14307771	14307987	14307775	non_blind	5	13160415	0	0	-2.57149e-14
chr21	14307984	14308169	14308165	non_blind	3	13160416	0	0	-2.57149e-14
chr21	14308166	14308555	14308170	blind	5	13160417	0	0	-2.57149e-14
chr21	14308166	14308555	14308551	blind	3	13160418	0	0	-2.57149e-14
chr21	14309041	14309494	14309490	non_blind	3	13160420	0	0	-2.57149e-14
chr21	14309491	14309777	14309495	blind	5	13160421	0	0	-2.57149e-14
chr21	14309491	14309777	14309773	blind	3	13160422	0	0	-2.57149e-14
chr21	14309774	14309934	14309778	non_blind	5	13160423	0	0	-2.57149e-14
chr21	14310198	14310412	14310408	non_blind	3	13160424	0	0	-2.57149e-14
chr21	14310409	14310575	14310413	blind	5	13160425	0	0	-2.57149e-14
chr21	14310409	14310575	14310571	blind	3	13160426	0	0	-2.57149e-14
chr21	14310572	14311105	14310576	non_blind	5	13160427	0	0	-2.57149e-14
chr21	14311102	14311279	14311275	non_blind	3	13160428	0	0	-2.57149e-14
chr21	14311276	14311355	14311280	non_blind	5	13160429	0	0	-2.57149e-14
chr21	14311352	14311532	14311528	non_blind	3	13160430	0	0	-2.57149e-14
chr21	14311539	14311563	14311543	blind	5	13160433	0	0	-2.57149e-14
chr21	14311539	14311563	14311559	blind	3	13160434	0	0	-2.57149e-14
chr21	14311560	14311669	14311564	non_blind	5	13160435	0	0	-2.57149e-14
chr21	14311757	14311911	14311907	non_blind	3	13160436	0	0	-2.57149e-14
chr21	14311908	14311952	14311912	blind	5	13160437	0	0	-2.57149e-14
chr21	14311908	14311952	14311948	blind	3	13160438	0	0	-2.57149e-14
chr21	14311949	14312112	14311953	non_blind	5	13160439	0	0	-2.57149e-14
chr21	14312109	14312221	14312217	non_blind	3	13160440	0	0	-2.57149e-14
chr21	14312218	14312479	14312222	non_blind	5	13160441	0	0	-2.57149e-14
chr21	14312787	14312858	14312791	non_blind	5	13160443	0	0	-2.57149e-14
chr21	14313021	14313100	14313096	non_blind	3	13160444	0	0	-2.57149e-14
chr21	14313097	14313144	14313101	non_blind	5	13160445	0	0	-2.57149e-14
chr21	14313141	14313383	14313379	non_blind	3	13160446	0	0	-2.57149e-14
chr21	14313380	14313781	14313384	non_blind	5	13160447	0	0	-2.57149e-14
chr21	14314191	14314371	14314367	non_blind	3	13160448	0	0	-2.57149e-14
chr21	14314368	14314392	14314372	non_blind	5	13160449	0	0	-2.57149e-14
chr21	14315395	14315579	14315575	non_blind	3	13160450	0	0	-2.57149e-14
chr21	14315576	14315643	14315580	non_blind	5	13160451	0	0	-2.57149e-14
chr21	14316108	14316154	14316150	non_blind	3	13160452	0	0	-2.57149e-14
chr21	14316151	14316288	14316155	blind	5	13160453	0	0	-2.57149e-14
chr21	14316151	14316288	14316284	blind	3	13160454	0	0	-2.57149e-14
chr21	14316285	14316312	14316289	non_blind	5	13160455	0	0	-2.57149e-14
chr21	14317962	14318061	14318057	non_blind	3	13160456	0	0	-2.57149e-14
chr21	14318058	14318186	14318062	blind	5	13160457	0	0	-2.57149e-14
chr21	14318058	14318186	14318182	blind	3	13160458	0	0	-2.57149e-14
chr21	14318183	14318289	14318187	non_blind	5	13160459	0	0	-2.57149e-14
chr21	14318286	14318327	14318323	non_blind	3	13160460	0	0	-2.57149e-14
chr21	14318324	14318443	14318328	non_blind	5	13160461	0	0	-2.57149e-14
chr21	14318440	14318522	14318518	non_blind	3	13160462	0	0	-2.57149e-14
chr21	14318519	14318549	14318523	non_blind	5	13160463	0	0	-2.57149e-14
chr21	14319048	14319317	14319313	non_blind	3	13160464	0	0	-2.57149e-14
chr21	14319314	14319421	14319318	non_blind	5	13160465	0	0	-2.57149e-14
chr21	14319418	14319571	14319567	non_blind	3	13160466	0	0	-2.57149e-14
chr21	14319568	14319693	14319572	non_blind	5	13160467	0	0	-2.57149e-14
chr21	14320119	14320166	14320162	non_blind	3	13160468	0	0	-2.57149e-14
chr21	14320163	14320270	14320167	non_blind	5	13160469	0	0	-2.57149e-14
chr21	14320267	14320466	14320462	non_blind	3	13160470	0	0	-2.57149e-14
chr21	14320463	14320798	14320467	non_blind	5	13160471	0	0	-2.57149e-14
chr21	14321875	14322001	14321997	blind	3	13160478	0	0	-2.57149e-14
chr21	14322583	14322608	14322604	non_blind	3	13160480	0	0	-2.57149e-14
chr21	14322609	14323138	14322613	non_blind	5	13160483	0	0	-2.57149e-14
chr21	14323135	14323208	14323204	non_blind	3	13160484	0	0	-2.57149e-14
chr21	14323205	14323398	14323209	blind	5	13160485	0	0	-2.57149e-14
chr21	14323205	14323398	14323394	blind	3	13160486	0	0	-2.57149e-14
chr21	14323395	14323517	14323399	non_blind	5	13160487	0	0	-2.57149e-14
chr21	14323514	14323676	14323672	non_blind	3	13160488	0	0	-2.57149e-14
chr21	14323673	14323935	14323677	non_blind	5	13160489	0	0	-2.57149e-14
chr21	14324627	14324780	14324776	non_blind	3	13160494	0	0	-2.57149e-14
chr21	14324777	14324809	14324781	blind	5	13160495	0	0	-2.57149e-14
chr21	14324777	14324809	14324805	blind	3	13160496	0	0	-2.57149e-14
chr21	14324806	14324967	14324810	blind	5	13160497	0	0	-2.57149e-14
chr21	14324806	14324967	14324963	blind	3	13160498	0	0	-2.57149e-14
chr21	14324973	14325027	14324977	non_blind	5	13160501	0	0	-2.57149e-14
chr21	14325024	14325079	14325075	non_blind	3	13160502	0	0	-2.57149e-14
chr21	14325076	14325165	14325080	non_blind	5	13160503	0	0	-2.57149e-14
chr21	14325215	14325344	14325340	non_blind	3	13160504	0	0	-2.57149e-14
chr21	14325341	14325601	14325345	non_blind	5	13160505	0	0	-2.57149e-14
chr21	14325598	14325657	14325653	non_blind	3	13160506	0	0	-2.57149e-14
chr21	14325654	14325737	14325658	non_blind	5	13160507	0	0	-2.57149e-14
chr21	14325734	14326143	14326139	non_blind	3	13160508	0	0	-2.57149e-14
chr21	14326140	14326441	14326144	blind	5	13160509	0	0	-2.57149e-14
chr21	14326140	14326441	14326437	blind	3	13160510	0	0	-2.57149e-14
chr21	14326438	14326622	14326442	non_blind	5	13160511	0	0	-2.57149e-14
chr21	14326619	14326672	14326668	non_blind	3	13160512	0	0	-2.57149e-14
chr21	14327406	14327780	14327776	blind	3	13160518	0	0	-2.57149e-14
chr21	14327777	14327848	14327781	non_blind	5	13160519	0	0	-2.57149e-14
chr21	14330312	14330497	14330493	blind	3	13160540	0	0	-2.57149e-14
chr21	14332222	14332547	14332543	non_blind	3	13160546	0	0	-2.57149e-14
chr21	14332544	14332893	14332548	non_blind	5	13160547	0	0	-2.57149e-14
chr21	14332890	14332944	14332940	non_blind	3	13160548	0	0	-2.57149e-14
chr21	14332980	14333250	14333246	non_blind	3	13160550	0	0	-2.57149e-14
chr21	14333261	14333297	14333265	non_blind	5	13160553	0	0	-2.57149e-14
chr21	14334089	14334202	14334198	non_blind	3	13160554	0	0	-2.57149e-14
chr21	14334329	14334436	14334432	non_blind	3	13160556	0	0	-2.57149e-14
chr21	14335113	14335258	14335117	non_blind	5	13160559	0	0	-2.57149e-14
chr21	14335259	14335911	14335263	blind	5	13160561	0	0	-2.57149e-14
chr21	14335259	14335911	14335907	blind	3	13160562	0	0	-2.57149e-14
chr21	14335908	14336076	14335912	non_blind	5	13160563	0	0	-2.57149e-14
chr21	14336341	14336453	14336449	non_blind	3	13160564	0	0	-2.57149e-14
chr21	14336450	14336573	14336454	blind	5	13160565	0	0	-2.57149e-14
chr21	14336450	14336573	14336569	blind	3	13160566	0	0	-2.57149e-14
chr21	14336570	14336637	14336574	non_blind	5	13160567	0	0	-2.57149e-14
chr21	14337139	14337193	14337189	non_blind	3	13160570	0	0	0.0847313
chr21	14337190	14337228	14337194	blind	5	13160571	0	0	0.0847313
chr21	14337190	14337228	14337224	blind	3	13160572	0	0	0.0847313
chr21	14337225	14337587	14337229	blind	5	13160573	0	0	0.0847313
chr21	14337225	14337587	14337583	blind	3	13160574	0	0	0.0847313
chr21	14337584	14337728	14337588	non_blind	5	13160575	0	0	0.0847313
chr21	14338428	14338587	14338432	blind	5	13160577	0	0	0.0847313
chr21	14338428	14338587	14338583	blind	3	13160578	0	0	0.0847313
chr21	14338584	14338769	14338588	blind	5	13160579	0	0	0.0847313
chr21	14338584	14338769	14338765	blind	3	13160580	0	0	0.0847313
chr21	14338766	14339001	14338770	blind	5	13160581	3	1.77936	0.0847313
chr21	14338766	14339001	14338997	blind	3	13160582	0	0	0.0847313
chr21	14339211	14339591	14339587	non_blind	3	13160586	0	0	0.0847313
chr21	14339614	14339715	14339711	non_blind	3	13160588	0	0	0.0847313
chr21	14339712	14339771	14339716	non_blind	5	13160589	0	0	0.0847313
chr21	14340594	14340843	14340598	non_blind	5	13160591	0	0	0.0847313
chr21	14341811	14341923	14341919	non_blind	3	13160592	0	0	0.0847313
chr21	14341920	14342068	14341924	blind	5	13160593	0	0	0.0847313
chr21	14341920	14342068	14342064	blind	3	13160594	0	0	0.0847313
chr21	14342065	14342360	14342069	non_blind	5	13160595	0	0	0.0847313
chr21	14344053	14344079	14344075	non_blind	3	13160602	0	0	0.0847313
chr21	14344076	14344180	14344080	non_blind	5	13160603	0	0	-2.57149e-14
chr21	14344177	14344240	14344236	non_blind	3	13160604	0	0	-2.57149e-14
chr21	14344237	14344286	14344241	blind	5	13160605	0	0	-2.57149e-14
chr21	14344237	14344286	14344282	blind	3	13160606	0	0	-2.57149e-14
chr21	14344283	14344689	14344287	non_blind	5	13160607	0	0	-2.57149e-14
chr21	14344686	14344864	14344860	non_blind	3	13160608	0	0	-2.57149e-14
chr21	14344861	14344937	14344865	non_blind	5	13160609	0	0	-2.57149e-14
chr21	14344934	14345198	14345194	non_blind	3	13160610	0	0	-2.57149e-14
chr21	14345195	14345220	14345199	non_blind	5	13160611	0	0	-2.57149e-14
chr21	14345217	14345292	14345288	non_blind	3	13160612	0	0	-2.57149e-14
chr21	14345289	14345532	14345293	non_blind	5	13160613	0	0	-2.57149e-14
chr21	14346624	14346772	14346768	non_blind	3	13160616	0	0	-2.57149e-14
chr21	14346769	14346915	14346773	non_blind	5	13160617	0	0	-2.57149e-14
chr21	14347194	14347221	14347198	non_blind	5	13160619	0	0	-2.57149e-14
chr21	14347431	14347544	14347540	non_blind	3	13160620	0	0	-2.57149e-14
chr21	14347541	14347572	14347545	non_blind	5	13160621	0	0	-2.57149e-14
chr21	14347569	14347719	14347715	non_blind	3	13160622	0	0	-2.57149e-14
chr21	14347716	14347754	14347720	non_blind	5	13160623	0	0	-2.57149e-14
chr21	14347751	14347868	14347864	non_blind	3	13160624	0	0	-2.57149e-14
chr21	14348518	14348580	14348576	non_blind	3	13160626	0	0	-2.57149e-14
chr21	14348577	14348810	14348581	non_blind	5	13160627	0	0	-2.57149e-14
chr21	14349801	14349918	14349914	non_blind	3	13160628	0	0	-2.57149e-14
chr21	14349915	14350158	14349919	non_blind	5	13160629	0	0	-2.57149e-14
chr21	14350155	14350240	14350236	non_blind	3	13160630	0	0	-2.57149e-14
chr21	14350425	14350541	14350537	non_blind	3	13160632	0	0	-2.57149e-14
chr21	14350538	14350583	14350542	non_blind	5	13160633	0	0	-2.57149e-14
chr21	14350593	14350623	14350619	non_blind	3	13160634	0	0	-2.57149e-14
chr21	14350620	14350697	14350624	non_blind	5	13160635	0	0	0.141219
chr21	14351685	14351851	14351847	non_blind	3	13160640	0	0	0.141219
chr21	14351848	14351898	14351894	blind	3	13160642	0	0	0.141219
chr21	14352239	14352436	14352432	non_blind	3	13160644	0	0	0.141219
chr21	14352746	14352858	14352854	non_blind	3	13160646	0	0	0.141219
chr21	14352855	14353011	14352859	non_blind	5	13160647	0	0	0.141219
chr21	14353189	14353325	14353321	non_blind	3	13160648	0	0	0.141219
chr21	14353322	14353369	14353326	non_blind	5	13160649	0	0	0.141219
chr21	14355457	14356250	14355461	non_blind	5	13160657	0	0	0.141219
chr21	14356247	14356339	14356335	non_blind	3	13160658	0	0	0.141219
chr21	14356336	14356502	14356340	non_blind	5	13160659	5	2.96559	0.141219
chr21	14356565	14356613	14356609	non_blind	3	13160660	0	0	0.141219
chr21	14356610	14356900	14356614	blind	5	13160661	0	0	0.141219
chr21	14356610	14356900	14356896	blind	3	13160662	0	0	0.141219
chr21	14356897	14356928	14356901	non_blind	5	13160663	0	0	0.141219
chr21	14356925	14356971	14356967	non_blind	3	13160664	0	0	0.141219
chr21	14356968	14357007	14356972	non_blind	5	13160665	0	0	0.141219
chr21	14357004	14357123	14357119	non_blind	3	13160666	0	0	0.141219
chr21	14357120	14357297	14357124	non_blind	5	13160667	0	0	0.141219
chr21	14357294	14357824	14357820	non_blind	3	13160668	0	0	0.141219
chr21	14357821	14357863	14357825	non_blind	5	13160669	0	0	0.141219
chr21	14358542	14358874	14358870	non_blind	3	13160670	0	0	-2.57149e-14
chr21	14358871	14358900	14358875	blind	5	13160671	0	0	-2.57149e-14
chr21	14358871	14358900	14358896	blind	3	13160672	0	0	-2.57149e-14
chr21	14358897	14359061	14358901	blind	5	13160673	0	0	-2.57149e-14
chr21	14358897	14359061	14359057	blind	3	13160674	0	0	-2.57149e-14
chr21	14359058	14359277	14359062	non_blind	5	13160675	0	0	-2.57149e-14
chr21	14359283	14359591	14359587	non_blind	3	13160676	0	0	-2.57149e-14
chr21	14359588	14359778	14359592	blind	5	13160677	0	0	-2.57149e-14
chr21	14359588	14359778	14359774	blind	3	13160678	0	0	-2.57149e-14
chr21	14360802	14360883	14360879	non_blind	3	13160682	0	0	-2.57149e-14
chr21	14360880	14361123	14360884	non_blind	5	13160683	0	0	-2.57149e-14
chr21	14361356	14361386	14361360	blind	5	13160685	0	0	-2.57149e-14
chr21	14361356	14361386	14361382	blind	3	13160686	0	0	-2.57149e-14
chr21	14361383	14361433	14361387	blind	5	13160687	0	0	-2.57149e-14
chr21	14361383	14361433	14361429	blind	3	13160688	0	0	-2.57149e-14
chr21	14361430	14361478	14361434	non_blind	5	13160689	0	0	-2.57149e-14
chr21	14363181	14363395	14363391	blind	3	13160694	0	0	-2.57149e-14
chr21	14363392	14363420	14363396	blind	5	13160695	0	0	-2.57149e-14
chr21	14363392	14363420	14363416	blind	3	13160696	0	0	-2.57149e-14
chr21	14363417	14363456	14363421	non_blind	5	13160697	0	0	-2.57149e-14
chr21	14364893	14365274	14365270	non_blind	3	13160700	0	0	-2.57149e-14
chr21	14365271	14365369	14365275	non_blind	5	13160701	0	0	-2.57149e-14
chr21	14365564	14365851	14365847	non_blind	3	13160702	0	0	-2.57149e-14
chr21	14365852	14366032	14366028	non_blind	3	13160704	0	0	-2.57149e-14
chr21	14366029	14366104	14366033	blind	5	13160705	0	0	-2.57149e-14
chr21	14366029	14366104	14366100	blind	3	13160706	0	0	-2.57149e-14
chr21	14366101	14366246	14366105	non_blind	5	13160707	0	0	-2.57149e-14
chr21	14366938	14367093	14367089	non_blind	3	13160714	0	0	-2.57149e-14
chr21	14367090	14367178	14367094	blind	5	13160715	0	0	-2.57149e-14
chr21	14367090	14367178	14367174	blind	3	13160716	0	0	-2.57149e-14
chr21	14367175	14367228	14367179	non_blind	5	13160717	0	0	-2.57149e-14
chr21	14367225	14367508	14367504	non_blind	3	13160718	0	0	-2.57149e-14
chr21	14367505	14367607	14367509	blind	5	13160719	0	0	-2.57149e-14
chr21	14367505	14367607	14367603	blind	3	13160720	0	0	-2.57149e-14
chr21	14367620	14367640	14367636	non_blind	3	13160722	0	0	-2.57149e-14
chr21	14367637	14367717	14367641	blind	5	13160723	0	0	-2.57149e-14
chr21	14367637	14367717	14367713	blind	3	13160724	0	0	-2.57149e-14
chr21	14367714	14367847	14367718	non_blind	5	13160725	0	0	-2.57149e-14
chr21	14368551	14368590	14368586	non_blind	3	13160726	0	0	-2.57149e-14
chr21	14368587	14368623	14368591	non_blind	5	13160727	0	0	-2.57149e-14
chr21	14370325	14370354	14370350	non_blind	3	13160732	0	0	-2.57149e-14
chr21	14370351	14370401	14370355	blind	5	13160733	0	0	-2.57149e-14
chr21	14370351	14370401	14370397	blind	3	13160734	0	0	-2.57149e-14
chr21	14370398	14370534	14370402	blind	5	13160735	0	0	-2.57149e-14
chr21	14370398	14370534	14370530	blind	3	13160736	0	0	-2.57149e-14
chr21	14370531	14370871	14370535	non_blind	5	13160737	0	0	-2.57149e-14
chr21	14371228	14371448	14371444	non_blind	3	13160738	0	0	-2.57149e-14
chr21	14371445	14371661	14371449	non_blind	5	13160739	0	0	-2.57149e-14
chr21	14371658	14371781	14371777	non_blind	3	13160740	0	0	-2.57149e-14
chr21	14371778	14371890	14371782	non_blind	5	13160741	0	0	-2.57149e-14
chr21	14371887	14372250	14372246	non_blind	3	13160742	0	0	-2.57149e-14
chr21	14372247	14372696	14372251	non_blind	5	13160743	0	0	-2.57149e-14
chr21	14373208	14373419	14373415	non_blind	3	13160744	0	0	-2.57149e-14
chr21	14373416	14373440	14373420	blind	5	13160745	0	0	0.734338
chr21	14373416	14373440	14373436	blind	3	13160746	0	0	0.734338
chr21	14373437	14373577	14373441	blind	5	13160747	0	0	0.734338
chr21	14373437	14373577	14373573	blind	3	13160748	0	0	0.734338
chr21	14373574	14373760	14373578	blind	5	13160749	0	0	0.734338
chr21	14373574	14373760	14373756	blind	3	13160750	0	0	0.734338
chr21	14373757	14373794	14373761	blind	5	13160751	0	0	0.734338
chr21	14373757	14373794	14373790	blind	3	13160752	0	0	0.734338
chr21	14373791	14374223	14373795	blind	5	13160753	0	0	0.734338
chr21	14373791	14374223	14374219	blind	3	13160754	0	0	0.734338
chr21	14374220	14374399	14374224	non_blind	5	13160755	26	15.4211	0.734338
chr21	14374455	14375180	14375176	non_blind	3	13160756	0	0	0.734338
chr21	14375177	14375238	14375181	non_blind	5	13160757	0	0	0.734338
chr21	14375862	14375892	14375866	non_blind	5	13160763	0	0	0.734338
chr21	14375961	14376191	14376187	non_blind	3	13160764	0	0	0.734338
chr21	14376364	14376505	14376501	blind	3	13160770	0	0	0.734338
chr21	14376502	14376633	14376506	blind	5	13160771	0	0	0.734338
chr21	14376502	14376633	14376629	blind	3	13160772	0	0	0.734338
chr21	14376630	14376782	14376634	non_blind	5	13160773	0	0	0.734338
chr21	14376789	14376856	14376852	non_blind	3	13160774	0	0	0.734338
chr21	14376853	14377240	14376857	non_blind	5	13160775	0	0	0.734338
chr21	14377237	14377320	14377316	non_blind	3	13160776	0	0	-2.57149e-14
chr21	14377317	14377401	14377321	non_blind	5	13160777	0	0	-2.57149e-14
chr21	14377649	14378244	14378240	blind	3	13160780	0	0	-2.57149e-14
chr21	14378241	14378498	14378245	non_blind	5	13160781	0	0	-2.57149e-14
chr21	14379515	14379548	14379544	non_blind	3	13160786	0	0	-2.57149e-14
chr21	14379545	14379834	14379549	non_blind	5	13160787	0	0	-2.57149e-14
chr21	14380216	14380432	14380428	non_blind	3	13160790	0	0	-2.57149e-14
chr21	14380429	14380804	14380433	non_blind	5	13160791	0	0	-2.57149e-14
chr21	14380804	14380823	14380808	non_blind	5	13160793	0	0	-2.57149e-14
chr21	14380967	14381045	14381041	non_blind	3	13160794	0	0	-2.57149e-14
chr21	14381042	14381095	14381046	non_blind	5	13160795	0	0	-2.57149e-14
chr21	14381359	14381460	14381456	non_blind	3	13160796	0	0	-2.57149e-14
chr21	14381457	14381543	14381461	blind	5	13160797	0	0	-2.57149e-14
chr21	14381457	14381543	14381539	blind	3	13160798	0	0	-2.57149e-14
chr21	14381540	14381907	14381544	blind	5	13160799	0	0	-2.57149e-14
chr21	14381540	14381907	14381903	blind	3	13160800	0	0	-2.57149e-14
chr21	14381904	14382476	14381908	non_blind	5	13160801	0	0	-2.57149e-14
chr21	14382473	14382710	14382706	non_blind	3	13160802	0	0	-2.57149e-14
chr21	14382707	14383005	14382711	blind	5	13160803	0	0	-2.57149e-14
chr21	14382707	14383005	14383001	blind	3	13160804	0	0	-2.57149e-14
chr21	14383002	14383051	14383006	blind	5	13160805	0	0	-2.57149e-14
chr21	14383002	14383051	14383047	blind	3	13160806	0	0	-2.57149e-14
chr21	14383048	14383102	14383052	blind	5	13160807	0	0	-2.57149e-14
chr21	14383048	14383102	14383098	blind	3	13160808	0	0	-2.57149e-14
chr21	14383099	14383431	14383103	blind	5	13160809	0	0	-2.57149e-14
chr21	14383099	14383431	14383427	blind	3	13160810	0	0	-2.57149e-14
chr21	14383428	14383650	14383432	blind	5	13160811	0	0	-2.57149e-14
chr21	14383428	14383650	14383646	blind	3	13160812	0	0	-2.57149e-14
chr21	14383647	14383868	14383651	blind	5	13160813	0	0	-2.57149e-14
chr21	14383647	14383868	14383864	blind	3	13160814	0	0	-2.57149e-14
chr21	14383865	14384041	14383869	non_blind	5	13160815	0	0	-2.57149e-14
chr21	14384038	14384161	14384157	non_blind	3	13160816	0	0	-2.57149e-14
chr21	14384158	14384314	14384162	blind	5	13160817	0	0	-2.57149e-14
chr21	14384158	14384314	14384310	blind	3	13160818	0	0	-2.57149e-14
chr21	14384311	14384530	14384315	blind	5	13160819	0	0	-2.57149e-14
chr21	14384311	14384530	14384526	blind	3	13160820	0	0	0.0564875
chr21	14384527	14384561	14384531	blind	5	13160821	0	0	0.0564875
chr21	14384527	14384561	14384557	blind	3	13160822	0	0	0.0564875
chr21	14384568	14384692	14384688	non_blind	3	13160824	0	0	0.0564875
chr21	14384689	14384729	14384693	blind	5	13160825	0	0	0.0564875
chr21	14384689	14384729	14384725	blind	3	13160826	0	0	0.0564875
chr21	14384726	14385177	14384730	non_blind	5	13160827	0	0	0.0564875
chr21	14386703	14386821	14386707	non_blind	5	13160829	0	0	0.0564875
chr21	14387418	14387616	14387612	non_blind	3	13160830	0	0	0.0564875
chr21	14387613	14387685	14387617	non_blind	5	13160831	0	0	0.0564875
chr21	14387682	14387903	14387899	non_blind	3	13160832	2	1.18624	0.0564875
chr21	14387900	14387953	14387904	non_blind	5	13160833	0	0	0.0564875
chr21	14387950	14387972	14387968	non_blind	3	13160834	0	0	0.0564875
chr21	14387969	14387999	14387973	non_blind	5	13160835	0	0	0.112975
chr21	14388270	14388594	14388590	non_blind	3	13160836	0	0	0.112975
chr21	14388591	14388676	14388595	non_blind	5	13160837	0	0	0.112975
chr21	14389046	14389301	14389050	non_blind	5	13160839	0	0	0.112975
chr21	14390081	14390145	14390141	non_blind	3	13160840	0	0	0.112975
chr21	14390142	14390433	14390146	non_blind	5	13160841	0	0	0.112975
chr21	14390430	14390788	14390784	non_blind	3	13160842	0	0	0.112975
chr21	14390793	14390869	14390865	non_blind	3	13160844	0	0	0.112975
chr21	14390866	14391001	14390870	non_blind	5	13160845	0	0	0.0564875
chr21	14391919	14391956	14391952	non_blind	3	13160850	0	0	0.0564875
chr21	14391953	14392058	14391957	non_blind	5	13160851	2	1.18624	0.0564875
chr21	14392907	14393180	14393176	non_blind	3	13160852	0	0	0.0564875
chr21	14393177	14393234	14393181	non_blind	5	13160853	0	0	0.0564875
chr21	14393399	14393571	14393567	non_blind	3	13160854	0	0	0.0564875
chr21	14393568	14393626	14393572	non_blind	5	13160855	0	0	0.0564875
chr21	14393979	14394025	14394021	non_blind	3	13160856	0	0	0.0564875
chr21	14394022	14394108	14394026	non_blind	5	13160857	0	0	0.0564875
chr21	14394105	14394339	14394335	non_blind	3	13160858	0	0	0.0564875
chr21	14394336	14394472	14394340	blind	5	13160859	0	0	0.0564875
chr21	14394336	14394472	14394468	blind	3	13160860	0	0	0.0564875
chr21	14394469	14394660	14394473	blind	5	13160861	0	0	0.0564875
chr21	14394469	14394660	14394656	blind	3	13160862	0	0	-2.57149e-14
chr21	14394657	14395287	14394661	blind	5	13160863	0	0	-2.57149e-14
chr21	14394657	14395287	14395283	blind	3	13160864	0	0	-2.57149e-14
chr21	14395284	14395649	14395288	blind	5	13160865	0	0	-2.57149e-14
chr21	14395284	14395649	14395645	blind	3	13160866	0	0	-2.57149e-14
chr21	14395646	14395724	14395650	blind	5	13160867	0	0	-2.57149e-14
chr21	14395646	14395724	14395720	blind	3	13160868	0	0	-2.57149e-14
chr21	14395721	14395804	14395725	blind	5	13160869	0	0	-2.57149e-14
chr21	14395721	14395804	14395800	blind	3	13160870	0	0	-2.57149e-14
chr21	14395801	14395886	14395805	non_blind	5	13160871	0	0	-2.57149e-14
chr21	14397115	14397201	14397197	non_blind	3	13160872	0	0	-2.57149e-14
chr21	14397198	14397306	14397202	non_blind	5	13160873	0	0	-2.57149e-14
chr21	14397860	14397968	14397964	non_blind	3	13160874	0	0	-2.57149e-14
chr21	14397965	14398019	14397969	blind	5	13160875	0	0	-2.57149e-14
chr21	14397965	14398019	14398015	blind	3	13160876	0	0	-2.57149e-14
chr21	14398016	14398052	14398020	non_blind	5	13160877	0	0	-2.57149e-14
chr21	14398544	14398628	14398624	non_blind	3	13160878	0	0	-2.57149e-14
chr21	14398625	14398797	14398629	non_blind	5	13160879	0	0	-2.57149e-14
chr21	14400036	14400057	14400053	non_blind	3	13160882	0	0	-2.57149e-14
chr21	14400054	14400132	14400058	non_blind	5	13160883	0	0	-2.57149e-14
chr21	14400129	14400213	14400209	non_blind	3	13160884	0	0	-2.57149e-14
chr21	14400210	14400274	14400214	blind	5	13160885	0	0	-2.57149e-14
chr21	14400210	14400274	14400270	blind	3	13160886	0	0	-2.57149e-14
chr21	14400271	14400298	14400275	non_blind	5	13160887	0	0	-2.57149e-14
chr21	14400295	14400490	14400486	non_blind	3	13160888	0	0	-2.57149e-14
chr21	14400487	14400618	14400491	non_blind	5	13160889	0	0	-2.57149e-14
chr21	14401164	14401273	14401269	non_blind	3	13160890	0	0	-2.57149e-14
chr21	14401270	14401327	14401274	non_blind	5	13160891	0	0	-2.57149e-14
chr21	14401324	14401429	14401425	non_blind	3	13160892	0	0	-2.57149e-14
chr21	14401473	14401549	14401545	non_blind	3	13160894	0	0	-2.57149e-14
chr21	14401546	14401792	14401550	blind	5	13160895	0	0	-2.57149e-14
chr21	14401546	14401792	14401788	blind	3	13160896	0	0	0.22595
chr21	14401789	14401941	14401793	non_blind	5	13160897	0	0	0.22595
chr21	14401938	14402192	14402188	non_blind	3	13160898	0	0	0.22595
chr21	14402189	14402355	14402193	non_blind	5	13160899	0	0	0.22595
chr21	14402754	14403011	14403007	non_blind	3	13160900	0	0	0.22595
chr21	14403008	14403306	14403012	blind	5	13160901	0	0	0.22595
chr21	14404209	14404371	14404367	non_blind	3	13160908	0	0	0.22595
chr21	14404368	14404710	14404372	non_blind	5	13160909	0	0	0.22595
chr21	14404707	14405134	14405130	non_blind	3	13160910	0	0	0.22595
chr21	14405131	14405471	14405135	non_blind	5	13160911	0	0	0.22595
chr21	14405468	14405541	14405537	non_blind	3	13160912	8	4.74495	0.22595
chr21	14405538	14405746	14405542	non_blind	5	13160913	0	0	0.22595
chr21	14405970	14406027	14406023	non_blind	3	13160914	0	0	0.22595
chr21	14406252	14406456	14406452	non_blind	3	13160920	0	0	0.22595
chr21	14406463	14406695	14406467	non_blind	5	13160923	0	0	0.22595
chr21	14409094	14409508	14409504	non_blind	3	13160932	0	0	0.22595
chr21	14409505	14409703	14409509	non_blind	5	13160933	0	0	0.22595
chr21	14411835	14411939	14411839	blind	5	13160939	0	0	0.22595
chr21	14411939	14412064	14412060	non_blind	3	13160942	0	0	0.22595
chr21	14412061	14412120	14412065	non_blind	5	13160943	0	0	0.22595
chr21	14412117	14412150	14412146	non_blind	3	13160944	0	0	0.22595
chr21	14412147	14412203	14412151	non_blind	5	13160945	0	0	-2.57149e-14
chr21	14412200	14412292	14412288	non_blind	3	13160946	0	0	-2.57149e-14
chr21	14412289	14412474	14412293	non_blind	5	13160947	0	0	-2.57149e-14
chr21	14412737	14412933	14412929	non_blind	3	13160950	0	0	-2.57149e-14
chr21	14412930	14413146	14412934	blind	5	13160951	0	0	-2.57149e-14
chr21	14412930	14413146	14413142	blind	3	13160952	0	0	-2.57149e-14
chr21	14413143	14413214	14413147	non_blind	5	13160953	0	0	-2.57149e-14
chr21	14413211	14413303	14413299	non_blind	3	13160954	0	0	-2.57149e-14
chr21	14413300	14413443	14413304	non_blind	5	13160955	0	0	-2.57149e-14
chr21	14414334	14414502	14414498	non_blind	3	13160958	0	0	-2.57149e-14
chr21	14414499	14414518	14414503	non_blind	5	13160959	0	0	-2.57149e-14
chr21	14414661	14414802	14414798	non_blind	3	13160960	0	0	-2.57149e-14
chr21	14414799	14414833	14414803	non_blind	5	13160961	0	0	-2.57149e-14
chr21	14414830	14414932	14414928	non_blind	3	13160962	0	0	-2.57149e-14
chr21	14414936	14415291	14414940	non_blind	5	13160965	0	0	-2.57149e-14
chr21	14415288	14415782	14415778	non_blind	3	13160966	0	0	-2.57149e-14
chr21	14415779	14416010	14415783	non_blind	5	13160967	0	0	-2.57149e-14
chr21	14416181	14416205	14416201	non_blind	3	13160968	0	0	-2.57149e-14
chr21	14416202	14416312	14416206	non_blind	5	13160969	0	0	-2.57149e-14
chr21	14417683	14417809	14417805	non_blind	3	13160970	0	0	-2.57149e-14
chr21	14417806	14418397	14417810	non_blind	5	13160971	0	0	-2.57149e-14
chr21	14419358	14419505	14419501	non_blind	3	13160972	0	0	-2.57149e-14
chr21	14420782	14420885	14420786	blind	5	13160975	0	0	-2.57149e-14
chr21	14420782	14420885	14420881	blind	3	13160976	0	0	-2.57149e-14
chr21	14420882	14420996	14420886	blind	5	13160977	0	0	-2.57149e-14
chr21	14420882	14420996	14420992	blind	3	13160978	0	0	-2.57149e-14
chr21	14420993	14421291	14420997	blind	5	13160979	0	0	-2.57149e-14
chr21	14420993	14421291	14421287	blind	3	13160980	0	0	-2.57149e-14
chr21	14422878	14422994	14422882	non_blind	5	13160987	0	0	-2.57149e-14
chr21	14422991	14423098	14423094	non_blind	3	13160988	0	0	-2.57149e-14
chr21	14423102	14423219	14423215	non_blind	3	13160990	0	0	-2.57149e-14
chr21	14423437	14423509	14423441	blind	5	13160997	0	0	-2.57149e-14
chr21	14423437	14423509	14423505	blind	3	13160998	0	0	-2.57149e-14
chr21	14424048	14424073	14424052	blind	5	13161003	0	0	-2.57149e-14
chr21	14424048	14424073	14424069	blind	3	13161004	0	0	-2.57149e-14
chr21	14424070	14424144	14424074	blind	5	13161005	0	0	-2.57149e-14
chr21	14424876	14425030	14424880	blind	5	13161013	0	0	-2.57149e-14
chr21	14427392	14427535	14427531	non_blind	3	13161016	0	0	-2.57149e-14
chr21	14427532	14427752	14427536	non_blind	5	13161017	0	0	-2.57149e-14
chr21	14428288	14428364	14428292	blind	5	13161019	0	0	-2.57149e-14
chr21	14428288	14428364	14428360	blind	3	13161020	0	0	-2.57149e-14
chr21	14428916	14428953	14428920	non_blind	5	13161025	0	0	-2.57149e-14
chr21	14430532	14430668	14430536	blind	5	13161031	0	0	-2.57149e-14
chr21	14430532	14430668	14430664	blind	3	13161032	0	0	-2.57149e-14
chr21	14430665	14430825	14430669	non_blind	5	13161033	0	0	-2.57149e-14
chr21	14431074	14431154	14431150	non_blind	3	13161034	0	0	-2.57149e-14
chr21	14431151	14432331	14431155	non_blind	5	13161035	0	0	-2.57149e-14
chr21	14432875	14433400	14433396	non_blind	3	13161036	0	0	-2.57149e-14
chr21	14433397	14433497	14433401	non_blind	5	13161037	0	0	-2.57149e-14
chr21	14433494	14433522	14433518	non_blind	3	13161038	0	0	-2.57149e-14
chr21	14433519	14433642	14433523	non_blind	5	13161039	0	0	-2.57149e-14
chr21	14434275	14434350	14434346	non_blind	3	13161040	0	0	-2.57149e-14
chr21	14434347	14434599	14434351	non_blind	5	13161041	0	0	-2.57149e-14
chr21	14435022	14435219	14435215	blind	3	13161044	0	0	-2.57149e-14
chr21	14435216	14435461	14435220	non_blind	5	13161045	0	0	-2.57149e-14
chr21	14435862	14436010	14436006	non_blind	3	13161046	0	0	-2.57149e-14
chr21	14436007	14436085	14436011	non_blind	5	13161047	0	0	-2.57149e-14
chr21	14436190	14436383	14436379	non_blind	3	13161048	0	0	-2.57149e-14
chr21	14436380	14436697	14436384	blind	5	13161049	0	0	-2.57149e-14
chr21	14436890	14437017	14436894	non_blind	5	13161053	0	0	-2.57149e-14
chr21	14437178	14437338	14437334	non_blind	3	13161054	0	0	-2.57149e-14
chr21	14437335	14437553	14437339	non_blind	5	13161055	0	0	-2.57149e-14
chr21	14437631	14437676	14437635	blind	5	13161057	0	0	-2.57149e-14
chr21	14437631	14437676	14437672	blind	3	13161058	0	0	-2.57149e-14
chr21	14437673	14437884	14437677	blind	5	13161059	0	0	-2.57149e-14
chr21	14437673	14437884	14437880	blind	3	13161060	0	0	-2.57149e-14
chr21	14438767	14438917	14438913	non_blind	3	13161062	0	0	-2.57149e-14
chr21	14438914	14439135	14438918	blind	5	13161063	0	0	-2.57149e-14
chr21	14438914	14439135	14439131	blind	3	13161064	0	0	-2.57149e-14
chr21	14439132	14439187	14439136	non_blind	5	13161065	0	0	-2.57149e-14
chr21	14439524	14439575	14439571	non_blind	3	13161072	0	0	-2.57149e-14
chr21	14439572	14439611	14439576	blind	5	13161073	0	0	-2.57149e-14
chr21	14439572	14439611	14439607	blind	3	13161074	0	0	-2.57149e-14
chr21	14439608	14439764	14439612	blind	5	13161075	0	0	-2.57149e-14
chr21	14439608	14439764	14439760	blind	3	13161076	0	0	-2.57149e-14
chr21	14439761	14440314	14439765	non_blind	5	13161077	0	0	-2.57149e-14
chr21	14440698	14440875	14440871	blind	3	13161080	0	0	-2.57149e-14
chr21	14440872	14440917	14440876	non_blind	5	13161081	0	0	-2.57149e-14
chr21	14442127	14442150	14442146	non_blind	3	13161082	0	0	-2.57149e-14
chr21	14442147	14442530	14442151	blind	5	13161083	0	0	-2.57149e-14
chr21	14442147	14442530	14442526	blind	3	13161084	0	0	-2.57149e-14
chr21	14442527	14442647	14442531	non_blind	5	13161085	0	0	-2.57149e-14
chr21	14443687	14443712	14443708	non_blind	3	13161086	0	0	-2.57149e-14
chr21	14443709	14444281	14443713	non_blind	5	13161087	0	0	-2.57149e-14
chr21	14444912	14444932	14444928	non_blind	3	13161088	0	0	0.0564875
chr21	14444929	14445195	14444933	non_blind	5	13161089	0	0	0.0564875
chr21	14445374	14445857	14445853	non_blind	3	13161090	0	0	0.0564875
chr21	14445854	14446008	14445858	blind	5	13161091	0	0	0.0564875
chr21	14445854	14446008	14446004	blind	3	13161092	0	0	0.0564875
chr21	14446005	14446073	14446009	blind	5	13161093	0	0	0.0564875
chr21	14446005	14446073	14446069	blind	3	13161094	0	0	0.0564875
chr21	14446070	14446135	14446074	blind	5	13161095	0	0	0.0564875
chr21	14446070	14446135	14446131	blind	3	13161096	0	0	0.0564875
chr21	14446132	14446200	14446136	non_blind	5	13161097	0	0	0.0564875
chr21	14446197	14446241	14446237	non_blind	3	13161098	2	1.18624	0.0564875
chr21	14446529	14446593	14446589	non_blind	3	13161100	0	0	0.0564875
chr21	14446605	14446675	14446609	blind	5	13161105	0	0	0.0564875
chr21	14446605	14446675	14446671	blind	3	13161106	0	0	0.0564875
chr21	14446672	14446740	14446676	non_blind	5	13161107	0	0	0.0564875
chr21	14447737	14448038	14448034	non_blind	3	13161108	0	0	0.0564875
chr21	14448035	14448112	14448108	blind	3	13161110	0	0	0.0564875
chr21	14448194	14448705	14448701	non_blind	3	13161112	0	0	0.0564875
chr21	14448702	14448913	14448706	blind	5	13161113	0	0	0.0564875
chr21	14448702	14448913	14448909	blind	3	13161114	0	0	0.0564875
chr21	14448910	14449118	14448914	non_blind	5	13161115	0	0	0.0564875
chr21	14450146	14450185	14450181	non_blind	3	13161120	0	0	-2.57149e-14
chr21	14450182	14450604	14450186	non_blind	5	13161121	0	0	-2.57149e-14
chr21	14450708	14450755	14450751	non_blind	3	13161122	0	0	-2.57149e-14
chr21	14450752	14450866	14450756	non_blind	5	13161123	0	0	-2.57149e-14
chr21	14450863	14451008	14451004	non_blind	3	13161124	0	0	-2.57149e-14
chr21	14451005	14451126	14451009	non_blind	5	13161125	0	0	-2.57149e-14
chr21	14452424	14452464	14452460	non_blind	3	13161126	0	0	-2.57149e-14
chr21	14452470	14452617	14452474	blind	5	13161129	0	0	-2.57149e-14
chr21	14452470	14452617	14452613	blind	3	13161130	0	0	-2.57149e-14
chr21	14452614	14452722	14452618	blind	5	13161131	0	0	-2.57149e-14
chr21	14452614	14452722	14452718	blind	3	13161132	0	0	-2.57149e-14
chr21	14452719	14452799	14452723	blind	5	13161133	0	0	-2.57149e-14
chr21	14452719	14452799	14452795	blind	3	13161134	0	0	-2.57149e-14
chr21	14452796	14452836	14452800	non_blind	5	13161135	0	0	-2.57149e-14
chr21	14453033	14453245	14453241	non_blind	3	13161136	0	0	-2.57149e-14
chr21	14453242	14453500	14453246	non_blind	5	13161137	0	0	-2.57149e-14
chr21	14454517	14454552	14454548	non_blind	3	13161138	0	0	-2.57149e-14
chr21	14454549	14454649	14454553	non_blind	5	13161139	0	0	-2.57149e-14
chr21	14454646	14454728	14454724	non_blind	3	13161140	0	0	-2.57149e-14
chr21	14454725	14454876	14454729	blind	5	13161141	0	0	-2.57149e-14
chr21	14454725	14454876	14454872	blind	3	13161142	0	0	-2.57149e-14
chr21	14454873	14455068	14454877	non_blind	5	13161143	0	0	-2.57149e-14
chr21	14455340	14455373	14455369	non_blind	3	13161144	0	0	-2.57149e-14
chr21	14455370	14455473	14455374	blind	5	13161145	0	0	-2.57149e-14
chr21	14455370	14455473	14455469	blind	3	13161146	0	0	-2.57149e-14
chr21	14455470	14455519	14455474	non_blind	5	13161147	0	0	-2.57149e-14
chr21	14455599	14455827	14455823	non_blind	3	13161148	0	0	-2.57149e-14
chr21	14455824	14455874	14455828	non_blind	5	13161149	0	0	-2.57149e-14
chr21	14456667	14456824	14456820	non_blind	3	13161150	0	0	-2.57149e-14
chr21	14456833	14456857	14456837	blind	5	13161153	0	0	-2.57149e-14
chr21	14456833	14456857	14456853	blind	3	13161154	0	0	-2.57149e-14
chr21	14456854	14456903	14456858	non_blind	5	13161155	0	0	-2.57149e-14
chr21	14457003	14457129	14457125	non_blind	3	13161156	0	0	-2.57149e-14
chr21	14457126	14457237	14457130	non_blind	5	13161157	0	0	-2.57149e-14
chr21	14457495	14457851	14457847	non_blind	3	13161158	0	0	-2.57149e-14
chr21	14457848	14457887	14457852	non_blind	5	13161159	0	0	-2.57149e-14
chr21	14458785	14458966	14458962	non_blind	3	13161160	0	0	-2.57149e-14
chr21	14458963	14459752	14458967	non_blind	5	13161161	0	0	-2.57149e-14
chr21	14459812	14459904	14459900	non_blind	3	13161162	0	0	-2.57149e-14
chr21	14459901	14459961	14459905	non_blind	5	13161163	0	0	-2.57149e-14
chr21	14460012	14460176	14460172	non_blind	3	13161164	0	0	-2.57149e-14
chr21	14460173	14460192	14460177	blind	5	13161165	0	0	0.282438
chr21	14460173	14460192	14460188	blind	3	13161166	0	0	0.282438
chr21	14460189	14460587	14460193	non_blind	5	13161167	0	0	0.282438
chr21	14460598	14461019	14460602	non_blind	5	13161169	0	0	0.282438
chr21	14461016	14461072	14461068	non_blind	3	13161170	0	0	0.282438
chr21	14461069	14461102	14461073	non_blind	5	13161171	0	0	0.282438
chr21	14461107	14461265	14461261	non_blind	3	13161172	0	0	0.282438
chr21	14461262	14461327	14461266	blind	5	13161173	0	0	0.282438
chr21	14461262	14461327	14461323	blind	3	13161174	0	0	0.282438
chr21	14461324	14461596	14461328	non_blind	5	13161175	0	0	0.282438
chr21	14462164	14462486	14462482	non_blind	3	13161176	10	5.93119	0.282438
chr21	14462483	14462566	14462562	blind	3	13161178	0	0	0.282438
chr21	14462563	14462970	14462567	blind	5	13161179	0	0	0.282438
chr21	14462563	14462970	14462966	blind	3	13161180	0	0	0.282438
chr21	14462967	14463113	14462971	non_blind	5	13161181	0	0	0.282438
chr21	14463110	14463341	14463337	non_blind	3	13161182	0	0	0.282438
chr21	14463338	14463359	14463342	non_blind	5	13161183	0	0	0.282438
chr21	14463541	14464166	14464162	non_blind	3	13161184	0	0	0.282438
chr21	14464163	14464744	14464167	non_blind	5	13161185	0	0	0.282438
chr21	14464741	14464815	14464811	non_blind	3	13161186	0	0	0.282438
chr21	14464812	14464978	14464816	non_blind	5	13161187	0	0	0.282438
chr21	14465705	14465749	14465709	non_blind	5	13161191	0	0	-2.57149e-14
chr21	14465777	14465938	14465934	non_blind	3	13161192	0	0	-2.57149e-14
chr21	14465935	14466002	14465939	non_blind	5	13161193	0	0	-2.57149e-14
chr21	14466250	14466387	14466254	non_blind	5	13161195	0	0	-2.57149e-14
chr21	14466384	14466410	14466406	non_blind	3	13161196	0	0	-2.57149e-14
chr21	14466407	14466671	14466411	blind	5	13161197	0	0	-2.57149e-14
chr21	14466407	14466671	14466667	blind	3	13161198	0	0	-2.57149e-14
chr21	14466668	14466715	14466672	non_blind	5	13161199	0	0	-2.57149e-14
chr21	14467063	14467138	14467134	non_blind	3	13161200	0	0	-2.57149e-14
chr21	14467135	14467339	14467139	non_blind	5	13161201	0	0	-2.57149e-14
chr21	14467336	14467384	14467380	non_blind	3	13161202	0	0	-2.57149e-14
chr21	14467381	14467778	14467385	non_blind	5	13161203	0	0	-2.57149e-14
chr21	14468392	14468688	14468684	non_blind	3	13161204	0	0	-2.57149e-14
chr21	14468685	14469286	14468689	non_blind	5	13161205	0	0	-2.57149e-14
chr21	14469574	14469628	14469624	non_blind	3	13161206	0	0	-2.57149e-14
chr21	14469625	14469675	14469629	blind	5	13161207	0	0	-2.57149e-14
chr21	14469625	14469675	14469671	blind	3	13161208	0	0	-2.57149e-14
chr21	14469672	14469893	14469676	blind	5	13161209	0	0	0.593119
chr21	14469672	14469893	14469889	blind	3	13161210	0	0	0.593119
chr21	14469897	14469981	14469977	non_blind	3	13161212	0	0	0.593119
chr21	14469978	14469996	14469982	blind	5	13161213	0	0	0.593119
chr21	14469978	14469996	14469992	blind	3	13161214	0	0	0.593119
chr21	14469993	14470024	14469997	non_blind	5	13161215	0	0	0.593119
chr21	14470021	14470222	14470218	non_blind	3	13161216	0	0	0.593119
chr21	14470241	14470488	14470484	non_blind	3	13161218	0	0	0.593119
chr21	14470485	14470566	14470489	non_blind	5	13161219	0	0	0.593119
chr21	14470563	14470601	14470597	non_blind	3	13161220	0	0	0.593119
chr21	14470598	14470648	14470602	non_blind	5	13161221	21	12.4555	0.593119
chr21	14471867	14472046	14472042	non_blind	3	13161222	0	0	0.593119
chr21	14472043	14472264	14472047	non_blind	5	13161223	0	0	0.593119
chr21	14472261	14472442	14472438	non_blind	3	13161224	0	0	0.593119
chr21	14472439	14472768	14472443	non_blind	5	13161225	0	0	0.593119
chr21	14472765	14472933	14472929	non_blind	3	13161226	0	0	0.593119
chr21	14472930	14472980	14472934	non_blind	5	13161227	0	0	0.593119
chr21	14472980	14473029	14472984	non_blind	5	13161229	0	0	0.593119
chr21	14473026	14473179	14473175	non_blind	3	13161230	0	0	0.593119
chr21	14473176	14473195	14473180	blind	5	13161231	0	0	0.593119
chr21	14473176	14473195	14473191	blind	3	13161232	0	0	0.593119
chr21	14473192	14473321	14473196	blind	5	13161233	0	0	-2.57149e-14
chr21	14473192	14473321	14473317	blind	3	13161234	0	0	-2.57149e-14
chr21	14473318	14474017	14473322	non_blind	5	13161235	0	0	-2.57149e-14
chr21	14474214	14474302	14474298	non_blind	3	13161236	0	0	-2.57149e-14
chr21	14474299	14474374	14474303	non_blind	5	13161237	0	0	-2.57149e-14
chr21	14474415	14474553	14474549	non_blind	3	13161238	0	0	-2.57149e-14
chr21	14474550	14474691	14474554	blind	5	13161239	0	0	-2.57149e-14
chr21	14474550	14474691	14474687	blind	3	13161240	0	0	-2.57149e-14
chr21	14474688	14474758	14474692	non_blind	5	13161241	0	0	-2.57149e-14
chr21	14474848	14475303	14475299	non_blind	3	13161242	0	0	-2.57149e-14
chr21	14475300	14475915	14475304	blind	5	13161243	0	0	-2.57149e-14
chr21	14476089	14476593	14476589	non_blind	3	13161248	0	0	-2.57149e-14
chr21	14476590	14476870	14476594	blind	5	13161249	0	0	-2.57149e-14
chr21	14476590	14476870	14476866	blind	3	13161250	0	0	-2.57149e-14
chr21	14476867	14476913	14476871	non_blind	5	13161251	0	0	-2.57149e-14
chr21	14477657	14477678	14477674	non_blind	3	13161252	0	0	-2.57149e-14
chr21	14479264	14479452	14479268	blind	5	13161257	0	0	-2.57149e-14
chr21	14479264	14479452	14479448	blind	3	13161258	0	0	-2.57149e-14
chr21	14479449	14479496	14479453	non_blind	5	13161259	0	0	-2.57149e-14
chr21	14479493	14479559	14479555	non_blind	3	13161260	0	0	-2.57149e-14
chr21	14479556	14479831	14479560	non_blind	5	13161261	0	0	-2.57149e-14
chr21	14480018	14480076	14480072	non_blind	3	13161264	0	0	-2.57149e-14
chr21	14480073	14480413	14480077	non_blind	5	13161265	0	0	-2.57149e-14
chr21	14480410	14480575	14480571	non_blind	3	13161266	0	0	-2.57149e-14
chr21	14480572	14480749	14480576	blind	5	13161267	0	0	-2.57149e-14
chr21	14480572	14480749	14480745	blind	3	13161268	0	0	-2.57149e-14
chr21	14480746	14480888	14480750	non_blind	5	13161269	0	0	-2.57149e-14
chr21	14482074	14482117	14482078	blind	5	13161273	0	0	-2.57149e-14
chr21	14482074	14482117	14482113	blind	3	13161274	0	0	-2.57149e-14
chr21	14482114	14482447	14482118	non_blind	5	13161275	0	0	-2.57149e-14
chr21	14482444	14482698	14482694	non_blind	3	13161276	0	0	-2.57149e-14
chr21	14482695	14482772	14482699	non_blind	5	13161277	0	0	-2.57149e-14
chr21	14482769	14482823	14482819	non_blind	3	13161278	0	0	-2.57149e-14
chr21	14482820	14482845	14482824	blind	5	13161279	0	0	-2.57149e-14
chr21	14482820	14482845	14482841	blind	3	13161280	0	0	-2.57149e-14
chr21	14482842	14482905	14482846	non_blind	5	13161281	0	0	-2.57149e-14
chr21	14483052	14483109	14483056	non_blind	5	13161283	0	0	-2.57149e-14
chr21	14483213	14483297	14483293	non_blind	3	13161284	0	0	-2.57149e-14
chr21	14483294	14483427	14483298	non_blind	5	13161285	0	0	-2.57149e-14
chr21	14483581	14483680	14483676	non_blind	3	13161286	0	0	-2.57149e-14
chr21	14483677	14483718	14483681	non_blind	5	13161287	0	0	-2.57149e-14
chr21	14483867	14484085	14484081	non_blind	3	13161288	0	0	-2.57149e-14
chr21	14484082	14484363	14484086	non_blind	5	13161289	0	0	-2.57149e-14
chr21	14484793	14484817	14484797	non_blind	5	13161293	0	0	-2.57149e-14
chr21	14484834	14484866	14484862	non_blind	3	13161294	0	0	-2.57149e-14
chr21	14484863	14485431	14484867	blind	5	13161295	0	0	-2.57149e-14
chr21	14484863	14485431	14485427	blind	3	13161296	0	0	-2.57149e-14
chr21	14485428	14485951	14485432	non_blind	5	13161297	0	0	-2.57149e-14
chr21	14485948	14485977	14485973	non_blind	3	13161298	0	0	-2.57149e-14
chr21	14485974	14486171	14485978	non_blind	5	13161299	0	0	-2.57149e-14
chr21	14486362	14486390	14486386	non_blind	3	13161300	0	0	-2.57149e-14
chr21	14486387	14486541	14486391	blind	5	13161301	0	0	-2.57149e-14
chr21	14486387	14486541	14486537	blind	3	13161302	0	0	-2.57149e-14
chr21	14486538	14486565	14486542	non_blind	5	13161303	0	0	-2.57149e-14
chr21	14486988	14487050	14487046	non_blind	3	13161304	0	0	-2.57149e-14
chr21	14487047	14487421	14487051	blind	5	13161305	0	0	-2.57149e-14
chr21	14487047	14487421	14487417	blind	3	13161306	0	0	-2.57149e-14
chr21	14487418	14487546	14487422	non_blind	5	13161307	0	0	-2.57149e-14
chr21	14487915	14488194	14488190	non_blind	3	13161308	0	0	-2.57149e-14
chr21	14488191	14488307	14488195	blind	5	13161309	0	0	-2.57149e-14
chr21	14488191	14488307	14488303	blind	3	13161310	0	0	-2.57149e-14
chr21	14488304	14488629	14488308	non_blind	5	13161311	0	0	-2.57149e-14
chr21	14488643	14488877	14488873	non_blind	3	13161312	0	0	-2.57149e-14
chr21	14488874	14488974	14488878	blind	5	13161313	0	0	-2.57149e-14
chr21	14488874	14488974	14488970	blind	3	13161314	0	0	-2.57149e-14
chr21	14488971	14489130	14488975	non_blind	5	13161315	0	0	-2.57149e-14
chr21	14489788	14489975	14489971	non_blind	3	13161316	0	0	-2.57149e-14
chr21	14489972	14490546	14489976	non_blind	5	13161317	0	0	-2.57149e-14
chr21	14490744	14490919	14490915	non_blind	3	13161318	0	0	-2.57149e-14
chr21	14490916	14491156	14490920	non_blind	5	13161319	0	0	-2.57149e-14
chr21	14491716	14491924	14491920	non_blind	3	13161320	0	0	-2.57149e-14
chr21	14491921	14492270	14491925	non_blind	5	13161321	0	0	-2.57149e-14
chr21	14492271	14492322	14492318	non_blind	3	13161322	0	0	-2.57149e-14
chr21	14492319	14492412	14492323	blind	5	13161323	0	0	-2.57149e-14
chr21	14492319	14492412	14492408	blind	3	13161324	0	0	-2.57149e-14
chr21	14492409	14492499	14492413	non_blind	5	13161325	0	0	-2.57149e-14
chr21	14492967	14493724	14493720	non_blind	3	13161326	0	0	-2.57149e-14
chr21	14493721	14493932	14493725	blind	5	13161327	0	0	-2.57149e-14
chr21	14493721	14493932	14493928	blind	3	13161328	0	0	-2.57149e-14
chr21	14493929	14494040	14493933	blind	5	13161329	0	0	-2.57149e-14
chr21	14494971	14495070	14495066	non_blind	3	13161336	0	0	-2.57149e-14
chr21	14495067	14495110	14495071	non_blind	5	13161337	0	0	-2.57149e-14
chr21	14496468	14496649	14496645	non_blind	3	13161338	0	0	-2.57149e-14
chr21	14496646	14497374	14496650	blind	5	13161339	0	0	-2.57149e-14
chr21	14497543	14497994	14497547	non_blind	5	13161345	0	0	-2.57149e-14
chr21	14498344	14498685	14498348	non_blind	5	13161347	0	0	-2.57149e-14
chr21	14498846	14498870	14498866	non_blind	3	13161348	0	0	-2.57149e-14
chr21	14499220	14500066	14500062	non_blind	3	13161350	0	0	-2.57149e-14
chr21	14500063	14500133	14500067	blind	5	13161351	0	0	-2.57149e-14
chr21	14500063	14500133	14500129	blind	3	13161352	0	0	-2.57149e-14
chr21	14500130	14500466	14500134	blind	5	13161353	0	0	-2.57149e-14
chr21	14500130	14500466	14500462	blind	3	13161354	0	0	-2.57149e-14
chr21	14500463	14500494	14500467	non_blind	5	13161355	0	0	-2.57149e-14
chr21	14501132	14501231	14501136	non_blind	5	13161359	0	0	-2.57149e-14
chr21	14502194	14502225	14502221	non_blind	3	13161360	0	0	-2.57149e-14
chr21	14502222	14502249	14502226	blind	5	13161361	0	0	-2.57149e-14
chr21	14502222	14502249	14502245	blind	3	13161362	0	0	-2.57149e-14
chr21	14502246	14502356	14502250	non_blind	5	13161363	0	0	-2.57149e-14
chr21	14502525	14502744	14502740	non_blind	3	13161364	0	0	-2.57149e-14
chr21	14502741	14502830	14502745	non_blind	5	13161365	0	0	-2.57149e-14
chr21	14502836	14503110	14502840	non_blind	5	13161367	0	0	-2.57149e-14
chr21	14503107	14503150	14503146	non_blind	3	13161368	0	0	-2.57149e-14
chr21	14503147	14503231	14503151	blind	5	13161369	0	0	-2.57149e-14
chr21	14503147	14503231	14503227	blind	3	13161370	0	0	-2.57149e-14
chr21	14503228	14503458	14503232	blind	5	13161371	0	0	-2.57149e-14
chr21	14503228	14503458	14503454	blind	3	13161372	0	0	-2.57149e-14
chr21	14503455	14503699	14503459	non_blind	5	13161373	0	0	-2.57149e-14
chr21	14503762	14503828	14503824	non_blind	3	13161374	0	0	-2.57149e-14
chr21	14503825	14504083	14503829	non_blind	5	13161375	0	0	-2.57149e-14
chr21	14504179	14504359	14504355	non_blind	3	13161376	0	0	-2.57149e-14
chr21	14504720	14505226	14504724	non_blind	5	13161379	0	0	-2.57149e-14
chr21	14506391	14506424	14506395	non_blind	5	13161385	0	0	-2.57149e-14
chr21	14508023	14508087	14508027	blind	5	13161395	0	0	-2.57149e-14
chr21	14509916	14510255	14510251	blind	3	13161404	0	0	-2.57149e-14
chr21	14510252	14510492	14510256	non_blind	5	13161405	0	0	-2.57149e-14
chr21	14510489	14510732	14510728	non_blind	3	13161406	0	0	-2.57149e-14
chr21	14510729	14510930	14510733	non_blind	5	13161407	0	0	-2.57149e-14
chr21	14510927	14511003	14510999	non_blind	3	13161408	0	0	-2.57149e-14
chr21	14511000	14511186	14511004	non_blind	5	13161409	0	0	-2.57149e-14
chr21	14511335	14511453	14511449	non_blind	3	13161410	0	0	-2.57149e-14
chr21	14511465	14511832	14511828	non_blind	3	13161412	0	0	-2.57149e-14
chr21	14511829	14511919	14511833	blind	5	13161413	0	0	-2.57149e-14
chr21	14511829	14511919	14511915	blind	3	13161414	0	0	-2.57149e-14
chr21	14511916	14512419	14511920	blind	5	13161415	0	0	-2.57149e-14
chr21	14511916	14512419	14512415	blind	3	13161416	0	0	-2.57149e-14
chr21	14512416	14512478	14512420	non_blind	5	13161417	0	0	-2.57149e-14
chr21	14512915	14512963	14512959	non_blind	3	13161418	0	0	-2.57149e-14
chr21	14512965	14513001	14512969	non_blind	5	13161421	0	0	-2.57149e-14
chr21	14512998	14513026	14513022	non_blind	3	13161422	0	0	-2.57149e-14
chr21	14513023	14513047	14513027	non_blind	5	13161423	0	0	-2.57149e-14
chr21	14513947	14513969	14513965	non_blind	3	13161424	0	0	-2.57149e-14
chr21	14513966	14514049	14513970	non_blind	5	13161425	0	0	-2.57149e-14
chr21	14514046	14514333	14514329	non_blind	3	13161426	0	0	-2.57149e-14
chr21	14514330	14514391	14514334	non_blind	5	13161427	0	0	-2.57149e-14
chr21	14514546	14514706	14514702	non_blind	3	13161428	0	0	-2.57149e-14
chr21	14514703	14514918	14514707	non_blind	5	13161429	0	0	-2.57149e-14
chr21	14515057	14515328	14515324	non_blind	3	13161430	0	0	-2.57149e-14
chr21	14515325	14515448	14515329	non_blind	5	13161431	0	0	-2.57149e-14
chr21	14516117	14516267	14516263	non_blind	3	13161432	0	0	-2.57149e-14
chr21	14516264	14516344	14516268	non_blind	5	13161433	0	0	-2.57149e-14
chr21	14516386	14516549	14516390	non_blind	5	13161435	0	0	-2.57149e-14
chr21	14516630	14516698	14516634	non_blind	5	13161437	0	0	-2.57149e-14
chr21	14516698	14516950	14516702	non_blind	5	13161439	0	0	-2.57149e-14
chr21	14516947	14517029	14517025	non_blind	3	13161440	0	0	-2.57149e-14
chr21	14517035	14517097	14517093	non_blind	3	13161442	0	0	-2.57149e-14
chr21	14517094	14517144	14517098	non_blind	5	13161443	0	0	-2.57149e-14
chr21	14517661	14517918	14517914	non_blind	3	13161444	0	0	-2.57149e-14
chr21	14517915	14517939	14517919	blind	5	13161445	0	0	-2.57149e-14
chr21	14517915	14517939	14517935	blind	3	13161446	0	0	-2.57149e-14
chr21	14517936	14518052	14517940	non_blind	5	13161447	0	0	-2.57149e-14
chr21	14518168	14518204	14518200	non_blind	3	13161448	0	0	-2.57149e-14
chr21	14518201	14518328	14518205	non_blind	5	13161449	0	0	-2.57149e-14
chr21	14519357	14519661	14519657	non_blind	3	13161450	0	0	-2.57149e-14
chr21	14519658	14519725	14519662	blind	5	13161451	0	0	-2.57149e-14
chr21	14519658	14519725	14519721	blind	3	13161452	0	0	-2.57149e-14
chr21	14519754	14520507	14519758	non_blind	5	13161457	0	0	-2.57149e-14
chr21	14520670	14521197	14521193	blind	3	13161460	0	0	-2.57149e-14
chr21	14521194	14521411	14521198	blind	5	13161461	0	0	-2.57149e-14
chr21	14521194	14521411	14521407	blind	3	13161462	0	0	-2.57149e-14
chr21	14521408	14521585	14521412	non_blind	5	13161463	0	0	-2.57149e-14
chr21	14521582	14521659	14521655	non_blind	3	13161464	0	0	-2.57149e-14
chr21	14521656	14521682	14521660	blind	5	13161465	0	0	-2.57149e-14
chr21	14521656	14521682	14521678	blind	3	13161466	0	0	-2.57149e-14
chr21	14521679	14521759	14521683	non_blind	5	13161467	0	0	-2.57149e-14
chr21	14521849	14521949	14521945	non_blind	3	13161468	0	0	-2.57149e-14
chr21	14521946	14522095	14521950	blind	5	13161469	0	0	-2.57149e-14
chr21	14521946	14522095	14522091	blind	3	13161470	0	0	-2.57149e-14
chr21	14522092	14522556	14522096	blind	5	13161471	0	0	-2.57149e-14
chr21	14522092	14522556	14522552	blind	3	13161472	0	0	-2.57149e-14
chr21	14522553	14522653	14522557	blind	5	13161473	0	0	-2.57149e-14
chr21	14522553	14522653	14522649	blind	3	13161474	0	0	-2.57149e-14
chr21	14522650	14522736	14522654	blind	5	13161475	0	0	-2.57149e-14
chr21	14522733	14523265	14522737	blind	5	13161477	0	0	-2.57149e-14
chr21	14522733	14523265	14523261	blind	3	13161478	0	0	-2.57149e-14
chr21	14523262	14523668	14523266	non_blind	5	13161479	0	0	-2.57149e-14
chr21	14523990	14524452	14524448	non_blind	3	13161480	0	0	-2.57149e-14
chr21	14524449	14524891	14524453	non_blind	5	13161481	0	0	-2.57149e-14
chr21	14524888	14525157	14525153	non_blind	3	13161482	0	0	-2.57149e-14
chr21	14525166	14525347	14525170	non_blind	5	13161485	0	0	-2.57149e-14
chr21	14525509	14525533	14525529	non_blind	3	13161486	0	0	-2.57149e-14
chr21	14525530	14526160	14525534	non_blind	5	13161487	0	0	-2.57149e-14
chr21	14526566	14526716	14526712	non_blind	3	13161488	0	0	-2.57149e-14
chr21	14526713	14526840	14526717	non_blind	5	13161489	0	0	-2.57149e-14
chr21	14526837	14526890	14526886	non_blind	3	13161490	0	0	-2.57149e-14
chr21	14526887	14526976	14526891	non_blind	5	13161491	0	0	-2.57149e-14
chr21	14526973	14527172	14527168	non_blind	3	13161492	0	0	-2.57149e-14
chr21	14527169	14527303	14527173	blind	5	13161493	0	0	-2.57149e-14
chr21	14527169	14527303	14527299	blind	3	13161494	0	0	-2.57149e-14
chr21	14527300	14527664	14527304	non_blind	5	13161495	0	0	-2.57149e-14
chr21	14527792	14527925	14527796	non_blind	5	13161497	0	0	-2.57149e-14
chr21	14528149	14528512	14528508	non_blind	3	13161498	0	0	0.0282438
chr21	14528509	14528790	14528513	non_blind	5	13161499	0	0	0.0282438
chr21	14529381	14529461	14529385	non_blind	5	13161501	0	0	0.0282438
chr21	14530109	14530429	14530425	blind	3	13161506	0	0	0.0282438
chr21	14530426	14530639	14530430	non_blind	5	13161507	0	0	0.0282438
chr21	14530721	14531196	14531192	non_blind	3	13161508	0	0	0.0282438
chr21	14531193	14531461	14531197	blind	5	13161509	0	0	0.0282438
chr21	14531193	14531461	14531457	blind	3	13161510	0	0	0.0282438
chr21	14531458	14531536	14531462	non_blind	5	13161511	0	0	0.0282438
chr21	14531533	14531941	14531937	non_blind	3	13161512	0	0	0.0282438
chr21	14531938	14532038	14531942	non_blind	5	13161513	1	0.593119	0.0282438
chr21	14532437	14532980	14532976	non_blind	3	13161514	0	0	0.0282438
chr21	14533744	14533793	14533748	blind	5	13161517	0	0	0.0282438
chr21	14533744	14533793	14533789	blind	3	13161518	0	0	0.0282438
chr21	14533790	14533819	14533794	non_blind	5	13161519	0	0	0.0282438
chr21	14533951	14534124	14534120	non_blind	3	13161520	0	0	0.0282438
chr21	14534121	14534388	14534125	blind	5	13161521	0	0	0.0282438
chr21	14534121	14534388	14534384	blind	3	13161522	0	0	0.0282438
chr21	14534385	14534697	14534389	non_blind	5	13161523	0	0	0.0282438
chr21	14534783	14534849	14534845	non_blind	3	13161524	0	0	0.0282438
chr21	14534846	14535005	14534850	non_blind	5	13161525	0	0	0.0282438
chr21	14535002	14535077	14535073	non_blind	3	13161526	0	0	-2.57149e-14
chr21	14535074	14535120	14535078	blind	5	13161527	0	0	-2.57149e-14
chr21	14535074	14535120	14535116	blind	3	13161528	0	0	-2.57149e-14
chr21	14535117	14535201	14535121	non_blind	5	13161529	0	0	-2.57149e-14
chr21	14535404	14535440	14535436	non_blind	3	13161530	0	0	-2.57149e-14
chr21	14535437	14535507	14535441	non_blind	5	13161531	0	0	-2.57149e-14
chr21	14535757	14535786	14535782	non_blind	3	13161532	0	0	-2.57149e-14
chr21	14535783	14535833	14535787	blind	5	13161533	0	0	-2.57149e-14
chr21	14535783	14535833	14535829	blind	3	13161534	0	0	-2.57149e-14
chr21	14535830	14536162	14536158	blind	3	13161536	0	0	-2.57149e-14
chr21	14536159	14536204	14536163	non_blind	5	13161537	0	0	-2.57149e-14
chr21	14536201	14536459	14536455	non_blind	3	13161538	0	0	-2.57149e-14
chr21	14536456	14536782	14536460	non_blind	5	13161539	0	0	-2.57149e-14
chr21	14536850	14537141	14537137	non_blind	3	13161540	0	0	-2.57149e-14
chr21	14537138	14537566	14537142	non_blind	5	13161541	0	0	-2.57149e-14
chr21	14538497	14538748	14538744	non_blind	3	13161542	0	0	-2.57149e-14
chr21	14538745	14538972	14538749	blind	5	13161543	0	0	-2.57149e-14
chr21	14538745	14538972	14538968	blind	3	13161544	0	0	-2.57149e-14
chr21	14538969	14539038	14538973	blind	5	13161545	0	0	-2.57149e-14
chr21	14538969	14539038	14539034	blind	3	13161546	0	0	-2.57149e-14
chr21	14542178	14542294	14542182	non_blind	5	13161559	0	0	-2.57149e-14
chr21	14542670	14542724	14542720	non_blind	3	13161560	0	0	-2.57149e-14
chr21	14543425	14543607	14543603	non_blind	3	13161562	0	0	-2.57149e-14
chr21	14543604	14544194	14543608	non_blind	5	13161563	0	0	-2.57149e-14
chr21	14544541	14544892	14544888	non_blind	3	13161564	0	0	-2.57149e-14
chr21	14544889	14544981	14544893	non_blind	5	13161565	0	0	-2.57149e-14
chr21	14547146	14547226	14547222	non_blind	3	13161574	0	0	0.0564875
chr21	14547223	14547319	14547227	blind	5	13161575	0	0	0.0564875
chr21	14547223	14547319	14547315	blind	3	13161576	0	0	0.0564875
chr21	14547316	14547403	14547320	non_blind	5	13161577	0	0	0.0564875
chr21	14547862	14548072	14548068	non_blind	3	13161578	0	0	0.0564875
chr21	14548069	14548233	14548073	non_blind	5	13161579	0	0	0.0564875
chr21	14548345	14548520	14548516	non_blind	3	13161580	0	0	0.0564875
chr21	14548517	14548716	14548521	blind	5	13161581	0	0	0.0564875
chr21	14548517	14548716	14548712	blind	3	13161582	0	0	0.0564875
chr21	14548725	14548902	14548729	non_blind	5	13161585	0	0	0.0564875
chr21	14549047	14549223	14549219	non_blind	3	13161586	2	1.18624	0.0564875
chr21	14549223	14549269	14549265	non_blind	3	13161588	0	0	0.0564875
chr21	14549266	14549365	14549270	non_blind	5	13161589	0	0	0.0564875
chr21	14549516	14549918	14549914	non_blind	3	13161590	0	0	0.0564875
chr21	14549915	14550417	14549919	non_blind	5	13161591	0	0	0.0564875
chr21	14550874	14551110	14551106	non_blind	3	13161592	0	0	0.0564875
chr21	14551107	14551288	14551111	blind	5	13161593	0	0	0.0564875
chr21	14551107	14551288	14551284	blind	3	13161594	0	0	0.0564875
chr21	14551285	14551654	14551289	non_blind	5	13161595	0	0	0.0564875
chr21	14552592	14553034	14553030	non_blind	3	13161596	0	0	0.0564875
chr21	14553031	14553227	14553035	non_blind	5	13161597	0	0	0.0564875
chr21	14553563	14553642	14553638	non_blind	3	13161598	0	0	-2.57149e-14
chr21	14553639	14554206	14553643	non_blind	5	13161599	0	0	-2.57149e-14
chr21	14554314	14554607	14554603	non_blind	3	13161600	0	0	-2.57149e-14
chr21	14554607	14554666	14554662	non_blind	3	13161602	0	0	-2.57149e-14
[truncated: 92,902 more rows]

## Sheet: 3A_E2 3hr R1
chr	start	end	position	type	fe_strand	fe_id	reads	normReads	norm4C
chr21	5103343	5103437	5103433	non_blind	3	13133862	0	0	-3.38354e-16
chr21	5145436	5146071	5145440	blind	5	13134039	0	0	-3.38354e-16
chr21	5220122	5220353	5220126	non_blind	5	13134163	0	0	-3.38354e-16
chr21	5222948	5223113	5222952	blind	5	13134173	0	0	-3.38354e-16
chr21	5228642	5228738	5228646	blind	5	13134197	0	0	-3.38354e-16
chr21	5229336	5229377	5229340	blind	5	13134209	0	0	-3.38354e-16
chr21	5229336	5229377	5229373	blind	3	13134210	0	0	-3.38354e-16
chr21	5231732	5231826	5231736	non_blind	5	13134229	0	0	-3.38354e-16
chr21	5233024	5233072	5233028	non_blind	5	13134233	0	0	-3.38354e-16
chr21	5248888	5249105	5248892	non_blind	5	13134297	0	0	-3.38354e-16
chr21	5250828	5251023	5251019	non_blind	3	13134306	0	0	-3.38354e-16
chr21	5251177	5251279	5251181	blind	5	13134309	0	0	-3.38354e-16
chr21	5357816	5358118	5358114	blind	3	13134578	0	0	-3.38354e-16
chr21	6505601	6505741	6505737	non_blind	3	13138004	0	0	-3.38354e-16
chr21	6914194	6914476	6914472	non_blind	3	13139360	0	0	-3.38354e-16
chr21	6916959	6917123	6916963	blind	5	13139369	0	0	-3.38354e-16
chr21	7257866	7258588	7258584	blind	3	13140224	0	0	-3.38354e-16
chr21	7258889	7259444	7259440	blind	3	13140230	0	0	-3.38354e-16
chr21	7260535	7260657	7260539	non_blind	5	13140235	0	0	-3.38354e-16
chr21	7915747	7916511	7915751	non_blind	5	13142157	0	0	-3.38354e-16
chr21	7931900	7932159	7931904	blind	5	13142159	0	0	-3.38354e-16
chr21	7936270	7937493	7937489	non_blind	3	13142166	0	0	-3.38354e-16
chr21	7940051	7940240	7940055	non_blind	5	13142171	0	0	-3.38354e-16
chr21	7942784	7943074	7943070	non_blind	3	13142174	0	0	-3.38354e-16
chr21	7943071	7943607	7943075	non_blind	5	13142175	0	0	-3.38354e-16
chr21	7947424	7951129	7951125	non_blind	3	13142176	0	0	-3.38354e-16
chr21	7951126	7951474	7951130	non_blind	5	13142177	0	0	-3.38354e-16
chr21	7957352	7958053	7958049	non_blind	3	13142194	0	0	-3.38354e-16
chr21	7965157	7965376	7965372	blind	3	13142210	0	0	-3.38354e-16
chr21	7965373	7965489	7965377	blind	5	13142211	0	0	-3.38354e-16
chr21	7968072	7968213	7968076	non_blind	5	13142219	0	0	-3.38354e-16
chr21	8049667	8049839	8049835	blind	3	13142268	0	0	-3.38354e-16
chr21	8252433	8252537	8252533	blind	3	13142978	0	0	-3.38354e-16
chr21	8252534	8252720	8252538	blind	5	13142979	0	0	-3.38354e-16
chr21	8252717	8253854	8252721	blind	5	13142981	0	0	-3.38354e-16
chr21	8255582	8255700	8255586	blind	5	13142997	0	0	-3.38354e-16
chr21	8255697	8256328	8255701	blind	5	13142999	0	0	-3.38354e-16
chr21	8550971	8551385	8550975	non_blind	5	13143913	0	0	-3.38354e-16
chr21	8631360	8631551	8631364	non_blind	5	13144195	0	0	-3.38354e-16
chr21	8759867	8760378	8760374	blind	3	13144472	0	0	-3.38354e-16
chr21	8764174	8764739	8764178	non_blind	5	13144485	0	0	-3.38354e-16
chr21	8772410	8772591	8772414	blind	5	13144535	0	0	-3.38354e-16
chr21	8774739	8774791	8774743	non_blind	5	13144553	0	0	-3.38354e-16
chr21	8781399	8781427	8781423	non_blind	3	13144586	0	0	-3.38354e-16
chr21	8782282	8782366	8782286	blind	5	13144595	0	0	-3.38354e-16
chr21	8812111	8812160	8812156	non_blind	3	13144746	0	0	-3.38354e-16
chr21	8838651	8838721	8838655	non_blind	5	13144887	0	0	-3.38354e-16
chr21	8988562	8988813	8988809	non_blind	3	13145090	0	0	-3.38354e-16
chr21	8989952	8990115	8989956	non_blind	5	13145095	0	0	-3.38354e-16
chr21	8990262	8990311	8990266	non_blind	5	13145097	0	0	-3.38354e-16
chr21	8990883	8991004	8991000	non_blind	3	13145100	0	0	-3.38354e-16
chr21	8991397	8991621	8991617	non_blind	3	13145102	0	0	-3.38354e-16
chr21	8991618	8991729	8991725	blind	3	13145104	0	0	0.896458
chr21	8991735	8991934	8991739	non_blind	5	13145107	0	0	0.896458
chr21	8993818	8994152	8994148	non_blind	3	13145108	0	0	0.896458
chr21	8994149	8994228	8994153	non_blind	5	13145109	0	0	0.896458
chr21	8994225	8994365	8994361	non_blind	3	13145110	0	0	0.896458
chr21	8994362	8994417	8994366	non_blind	5	13145111	0	0	0.896458
chr21	8994442	8994710	8994706	non_blind	3	13145112	0	0	0.896458
chr21	8994707	8994954	8994711	blind	5	13145113	0	0	0.896458
chr21	8994707	8994954	8994950	blind	3	13145114	0	0	0.896458
chr21	8994951	8995017	8994955	non_blind	5	13145115	0	0	0.896458
chr21	8995014	8995056	8995052	non_blind	3	13145116	21	18.8256	0.896458
chr21	8995053	8995298	8995057	non_blind	5	13145117	0	0	0.896458
chr21	8995298	8995332	8995302	non_blind	5	13145119	0	0	0.896458
chr21	8995329	8995437	8995433	non_blind	3	13145120	0	0	0.896458
chr21	8995434	8995481	8995438	non_blind	5	13145121	0	0	0.896458
chr21	8995478	8995513	8995509	non_blind	3	13145122	0	0	0.896458
chr21	8995510	8995993	8995514	blind	5	13145123	0	0	0.896458
chr21	8998885	8999107	8999103	non_blind	3	13145130	0	0	0.896458
chr21	8999104	8999391	8999108	blind	5	13145131	0	0	0.896458
chr21	8999388	8999475	8999392	non_blind	5	13145133	0	0	0.896458
chr21	9001547	9001686	9001551	blind	5	13145145	0	0	0.896458
chr21	9004335	9004392	9004388	non_blind	3	13145158	0	0	-3.38354e-16
chr21	9007988	9008165	9008161	non_blind	3	13145174	0	0	-3.38354e-16
chr21	9008678	9008897	9008682	blind	5	13145177	0	0	-3.38354e-16
chr21	9008678	9008897	9008893	blind	3	13145178	0	0	-3.38354e-16
chr21	9011154	9011781	9011777	blind	3	13145186	0	0	-3.38354e-16
chr21	9014863	9015152	9014867	non_blind	5	13145205	0	0	-3.38354e-16
chr21	9015149	9015271	9015267	non_blind	3	13145206	0	0	-3.38354e-16
chr21	9015268	9015352	9015272	non_blind	5	13145207	0	0	-3.38354e-16
chr21	9029149	9029236	9029232	non_blind	3	13145280	0	0	-3.38354e-16
chr21	9071224	9071313	9071228	non_blind	5	13145419	0	0	-3.38354e-16
chr21	9076068	9076191	9076072	non_blind	5	13145439	0	0	-3.38354e-16
chr21	9091910	9091962	9091914	non_blind	5	13145495	0	0	-3.38354e-16
chr21	9108501	9108654	9108650	blind	3	13145594	0	0	-3.38354e-16
chr21	9120288	9120343	9120339	non_blind	3	13145654	0	0	-3.38354e-16
chr21	9317769	9317800	9317773	non_blind	5	13146403	0	0	-3.38354e-16
chr21	9363086	9363164	9363090	non_blind	5	13146661	0	0	-3.38354e-16
chr21	9612574	9612769	9612765	non_blind	3	13147166	0	0	-3.38354e-16
chr21	9647297	9647359	9647301	non_blind	5	13147341	0	0	-3.38354e-16
chr21	9653003	9653022	9653018	non_blind	3	13147356	0	0	-3.38354e-16
chr21	9656135	9656265	9656139	non_blind	5	13147375	0	0	-3.38354e-16
chr21	9699752	9699812	9699808	non_blind	3	13147548	0	0	-3.38354e-16
chr21	9699809	9699840	9699813	blind	5	13147549	0	0	-3.38354e-16
chr21	9699809	9699840	9699836	blind	3	13147550	0	0	-3.38354e-16
chr21	9699837	9699890	9699841	non_blind	5	13147551	0	0	-3.38354e-16
chr21	9699887	9699935	9699931	non_blind	3	13147552	0	0	-3.38354e-16
chr21	9722206	9722285	9722281	non_blind	3	13147628	0	0	-3.38354e-16
chr21	9722756	9722875	9722871	non_blind	3	13147634	0	0	-3.38354e-16
chr21	9725702	9726186	9726182	blind	3	13147652	0	0	-3.38354e-16
chr21	9728842	9728962	9728958	non_blind	3	13147668	0	0	-3.38354e-16
chr21	9739699	9739760	9739756	non_blind	3	13147684	0	0	-3.38354e-16
chr21	9742407	9742518	9742514	non_blind	3	13147686	0	0	-3.38354e-16
chr21	9744811	9744999	9744815	blind	5	13147699	0	0	-3.38354e-16
chr21	9745367	9745614	9745371	non_blind	5	13147703	0	0	-3.38354e-16
chr21	9746578	9746722	9746718	non_blind	3	13147706	0	0	-3.38354e-16
chr21	9747612	9747751	9747747	blind	3	13147712	0	0	-3.38354e-16
chr21	9751529	9751868	9751533	non_blind	5	13147723	0	0	-3.38354e-16
chr21	9751865	9751914	9751910	non_blind	3	13147724	0	0	-3.38354e-16
chr21	9752084	9752118	9752114	non_blind	3	13147738	0	0	-3.38354e-16
chr21	9752194	9752243	9752239	non_blind	3	13147746	0	0	-3.38354e-16
chr21	9752360	9752522	9752364	non_blind	5	13147751	0	0	-3.38354e-16
chr21	9754088	9754181	9754092	non_blind	5	13147757	0	0	-3.38354e-16
chr21	9758379	9758427	9758423	non_blind	3	13147778	0	0	-3.38354e-16
chr21	9758424	9759049	9758428	non_blind	5	13147779	0	0	-3.38354e-16
chr21	9759086	9759464	9759460	non_blind	3	13147780	0	0	-3.38354e-16
chr21	9759461	9759875	9759465	blind	5	13147781	0	0	-3.38354e-16
chr21	9759461	9759875	9759871	blind	3	13147782	0	0	-3.38354e-16
chr21	9759872	9759968	9759876	non_blind	5	13147783	0	0	-3.38354e-16
chr21	9760705	9760972	9760968	non_blind	3	13147784	0	0	-3.38354e-16
chr21	9760969	9761179	9760973	non_blind	5	13147785	0	0	0.512262
chr21	9761197	9761263	9761259	non_blind	3	13147786	0	0	0.512262
chr21	9761260	9761383	9761264	non_blind	5	13147787	0	0	0.512262
chr21	9761600	9761740	9761736	non_blind	3	13147788	0	0	0.512262
chr21	9761839	9762428	9762424	non_blind	3	13147790	0	0	0.512262
chr21	9762425	9762697	9762429	blind	5	13147791	0	0	0.512262
chr21	9762425	9762697	9762693	blind	3	13147792	0	0	0.512262
chr21	9762694	9762821	9762698	blind	5	13147793	0	0	0.512262
chr21	9762694	9762821	9762817	blind	3	13147794	0	0	0.512262
chr21	9762818	9763148	9762822	non_blind	5	13147795	0	0	0.725704
chr21	9763606	9763671	9763667	non_blind	3	13147796	12	10.7575	0.725704
chr21	9763668	9763860	9763672	blind	5	13147797	0	0	0.725704
chr21	9763668	9763860	9763856	blind	3	13147798	0	0	0.725704
chr21	9763857	9763956	9763861	non_blind	5	13147799	0	0	0.725704
chr21	9763957	9764008	9763961	non_blind	5	13147801	0	0	0.725704
chr21	9764005	9764029	9764025	non_blind	3	13147802	0	0	0.725704
chr21	9764026	9764064	9764030	blind	5	13147803	0	0	0.725704
chr21	9764026	9764064	9764060	blind	3	13147804	0	0	0.725704
chr21	9764250	9764284	9764280	non_blind	3	13147806	0	0	0.725704
chr21	9770926	9770983	9770930	non_blind	5	13147829	5	4.48229	0.725704
chr21	9772211	9772371	9772215	non_blind	5	13147833	0	0	0.725704
chr21	9775724	9775840	9775836	non_blind	3	13147850	0	0	0.213442
chr21	9776252	9776424	9776420	non_blind	3	13147858	0	0	0.213442
chr21	9776421	9776528	9776524	blind	3	13147860	0	0	0.213442
chr21	9777170	9777410	9777174	non_blind	5	13147867	0	0	0.213442
chr21	9777554	9777597	9777558	blind	5	13147869	0	0	0.213442
chr21	9782497	9782572	9782501	non_blind	5	13147897	0	0	0.213442
chr21	9784229	9784307	9784303	non_blind	3	13147906	0	0	0.256131
chr21	9785321	9785485	9785481	non_blind	3	13147912	0	0	0.256131
chr21	9788219	9788366	9788362	non_blind	3	13147938	0	0	0.256131
chr21	9788363	9788430	9788426	blind	3	13147940	0	0	0.0426885
chr21	9788518	9788555	9788551	non_blind	3	13147944	0	0	0.0426885
chr21	9790316	9790351	9790347	non_blind	3	13147962	0	0	0.0426885
chr21	9792901	9793086	9793082	non_blind	3	13147982	0	0	0.0426885
chr21	9796160	9796353	9796164	non_blind	5	13147999	0	0	0.0426885
chr21	9810983	9811058	9811054	blind	3	13148076	0	0	0.0426885
chr21	9812698	9812989	9812985	non_blind	3	13148084	0	0	0.0426885
chr21	9813254	9813723	9813719	non_blind	3	13148088	1	0.896458	0.0426885
chr21	9820293	9820852	9820848	non_blind	3	13148128	0	0	0.0426885
chr21	9836920	9837050	9836924	blind	5	13148215	0	0	0.0426885
chr21	9836920	9837050	9837046	blind	3	13148216	0	0	0.0426885
chr21	9838035	9838158	9838154	non_blind	3	13148224	0	0	0.0426885
chr21	9838155	9838325	9838159	blind	5	13148225	0	0	0.0426885
chr21	9838155	9838325	9838321	blind	3	13148226	0	0	0.0426885
chr21	9839150	9839225	9839154	blind	5	13148233	0	0	0.0426885
chr21	9839150	9839225	9839221	blind	3	13148234	0	0	0.0426885
chr21	9839222	9839461	9839226	non_blind	5	13148235	0	0	0.0426885
chr21	9839829	9839976	9839833	non_blind	5	13148239	0	0	0.0426885
chr21	9840391	9840494	9840395	non_blind	5	13148243	0	0	-3.96508e-16
chr21	9840599	9840746	9840603	non_blind	5	13148245	0	0	-3.96508e-16
chr21	9840850	9841009	9841005	blind	3	13148248	0	0	-3.96508e-16
chr21	9844735	9844885	9844881	blind	3	13148270	0	0	-3.96508e-16
chr21	9851604	9851769	9851608	non_blind	5	13148303	0	0	-3.96508e-16
chr21	9860532	9861034	9861030	blind	3	13148362	0	0	-3.96508e-16
chr21	9861044	9861169	9861165	non_blind	3	13148364	0	0	-3.96508e-16
chr21	9862330	9862444	9862440	non_blind	3	13148366	0	0	-3.96508e-16
chr21	9865165	9865374	9865169	blind	5	13148383	0	0	-3.96508e-16
chr21	9869964	9870126	9869968	blind	5	13148399	0	0	-3.96508e-16
chr21	9871121	9871208	9871125	non_blind	5	13148405	0	0	-3.96508e-16
chr21	9874432	9874519	9874515	non_blind	3	13148416	0	0	-3.96508e-16
chr21	9877816	9877914	9877910	blind	3	13148430	0	0	-3.96508e-16
chr21	9887819	9887938	9887934	non_blind	3	13148484	0	0	-3.96508e-16
chr21	9892364	9892516	9892368	non_blind	5	13148507	0	0	-3.96508e-16
chr21	9893917	9893939	9893935	non_blind	3	13148516	0	0	-3.96508e-16
chr21	9898034	9898078	9898074	non_blind	3	13148536	0	0	-3.96508e-16
chr21	9914898	9915175	9914902	blind	5	13148591	0	0	-3.96508e-16
chr21	9917303	9917482	9917307	blind	5	13148605	0	0	-3.96508e-16
chr21	9923341	9923896	9923345	non_blind	5	13148627	0	0	-3.96508e-16
chr21	9926371	9926396	9926375	blind	5	13148637	0	0	-3.96508e-16
chr21	9926371	9926396	9926392	blind	3	13148638	0	0	-3.96508e-16
chr21	9945840	9946342	9946338	blind	3	13148708	0	0	-3.96508e-16
chr21	9946536	9946747	9946540	non_blind	5	13148711	0	0	-3.96508e-16
chr21	9971890	9971931	9971894	blind	5	13148805	0	0	-3.96508e-16
chr21	9971890	9971931	9971927	blind	3	13148806	0	0	-3.96508e-16
chr21	9972948	9973301	9973297	non_blind	3	13148808	0	0	-3.96508e-16
chr21	9973298	9973681	9973302	blind	5	13148809	0	0	-3.96508e-16
chr21	9973298	9973681	9973677	blind	3	13148810	0	0	-3.96508e-16
chr21	9974839	9975085	9975081	non_blind	3	13148816	0	0	-3.96508e-16
chr21	9976254	9976444	9976440	non_blind	3	13148818	0	0	-3.96508e-16
chr21	9978274	9978504	9978500	non_blind	3	13148832	0	0	-3.96508e-16
chr21	9988829	9988941	9988937	blind	3	13148864	0	0	-3.96508e-16
chr21	10005285	10005363	10005359	blind	3	13148932	0	0	-3.96508e-16
chr21	10014824	10014855	10014851	non_blind	3	13148964	0	0	-3.96508e-16
chr21	10014852	10015019	10015015	blind	3	13148966	0	0	-3.96508e-16
chr21	10024499	10024660	10024656	non_blind	3	13149004	0	0	-3.96508e-16
chr21	10270164	10270253	10270168	non_blind	5	13149597	0	0	-3.96508e-16
chr21	10270250	10270341	10270337	non_blind	3	13149598	0	0	0.0426885
chr21	10272116	10272274	10272270	non_blind	3	13149606	0	0	0.0426885
chr21	10272271	10272341	10272275	non_blind	5	13149607	0	0	0.0426885
chr21	10328958	10329145	10328962	non_blind	5	13149637	0	0	0.0426885
chr21	10329352	10329503	10329499	non_blind	3	13149638	0	0	0.0426885
chr21	10329500	10329627	10329623	blind	3	13149640	0	0	0.0426885
chr21	10331135	10331210	10331139	blind	5	13149655	0	0	0.0426885
chr21	10332950	10333097	10332954	non_blind	5	13149665	0	0	0.0426885
chr21	10336047	10336172	10336168	blind	3	13149696	0	0	0.0426885
chr21	10337182	10337277	10337273	blind	3	13149706	0	0	0.0426885
chr21	10343450	10343663	10343659	blind	3	13149734	1	0.896458	0.0426885
chr21	10359139	10359252	10359143	blind	5	13149831	0	0	0.0426885
chr21	10360026	10360725	10360030	blind	5	13149835	0	0	0.0426885
chr21	10361542	10361574	10361546	non_blind	5	13149839	0	0	0.0426885
chr21	10384422	10384448	10384426	non_blind	5	13149987	0	0	0.0426885
chr21	10385739	10385794	10385743	non_blind	5	13149993	0	0	0.0426885
chr21	10386499	10386895	10386891	blind	3	13150002	0	0	0.0426885
chr21	10387145	10387168	10387149	non_blind	5	13150007	0	0	0.0426885
chr21	10400673	10401034	10400677	non_blind	5	13150097	0	0	0.0426885
chr21	10402596	10402677	10402673	non_blind	3	13150108	0	0	0.0426885
chr21	10403107	10403148	10403111	blind	5	13150115	0	0	0.0426885
chr21	10405428	10405450	10405432	blind	5	13150135	0	0	-3.96508e-16
chr21	10405428	10405450	10405446	blind	3	13150136	0	0	-3.96508e-16
chr21	10405480	10405541	10405537	blind	3	13150142	0	0	-3.96508e-16
chr21	10406569	10406615	10406611	non_blind	3	13150150	0	0	-3.96508e-16
chr21	10410717	10410779	10410721	non_blind	5	13150167	0	0	-3.96508e-16
chr21	10413839	10414269	10413843	non_blind	5	13150171	0	0	-3.96508e-16
chr21	10417685	10417751	10417747	non_blind	3	13150188	0	0	-3.96508e-16
chr21	10418518	10418967	10418522	non_blind	5	13150197	0	0	-3.96508e-16
chr21	10419240	10419367	10419244	non_blind	5	13150199	0	0	-3.96508e-16
chr21	10420793	10420865	10420861	non_blind	3	13150206	0	0	-3.96508e-16
chr21	10423203	10423389	10423207	non_blind	5	13150219	0	0	-3.96508e-16
chr21	10423386	10423416	10423412	non_blind	3	13150220	0	0	-3.96508e-16
chr21	10424554	10424599	10424558	blind	5	13150233	0	0	-3.96508e-16
chr21	10424554	10424599	10424595	blind	3	13150234	0	0	-3.96508e-16
chr21	10426144	10426452	10426148	blind	5	13150239	0	0	-3.96508e-16
chr21	10426449	10426482	10426453	blind	5	13150241	0	0	-3.96508e-16
chr21	10426449	10426482	10426478	blind	3	13150242	0	0	-3.96508e-16
chr21	10426479	10427049	10426483	non_blind	5	13150243	0	0	-3.96508e-16
chr21	10427511	10427573	10427569	non_blind	3	13150244	0	0	-3.96508e-16
chr21	10429646	10429717	10429713	non_blind	3	13150250	0	0	-3.96508e-16
chr21	10429714	10429742	10429718	non_blind	5	13150251	0	0	-3.96508e-16
chr21	10431251	10431389	10431385	blind	3	13150258	0	0	-3.96508e-16
chr21	10437895	10438001	10437899	blind	5	13150289	0	0	-3.96508e-16
chr21	10438329	10438348	10438333	non_blind	5	13150297	0	0	-3.96508e-16
chr21	10454428	10454530	10454432	non_blind	5	13150357	0	0	-3.96508e-16
chr21	10456392	10456573	10456569	non_blind	3	13150364	0	0	-3.96508e-16
chr21	10457603	10458082	10458078	non_blind	3	13150372	0	0	-3.96508e-16
chr21	10458079	10458188	10458184	blind	3	13150374	0	0	-3.96508e-16
chr21	10458371	10458522	10458375	non_blind	5	13150379	0	0	-3.96508e-16
chr21	10458782	10458837	10458786	blind	5	13150381	0	0	-3.96508e-16
chr21	10458782	10458837	10458833	blind	3	13150382	0	0	-3.96508e-16
chr21	10458834	10459163	10458838	non_blind	5	13150383	0	0	-3.96508e-16
chr21	10459347	10459576	10459351	non_blind	5	13150385	0	0	-3.96508e-16
chr21	10460593	10460760	10460756	blind	3	13150390	0	0	-3.96508e-16
chr21	10463225	10463299	10463229	non_blind	5	13150401	0	0	-3.96508e-16
chr21	10464466	10464520	10464470	blind	5	13150411	0	0	-3.96508e-16
chr21	10464466	10464520	10464516	blind	3	13150412	0	0	-3.96508e-16
chr21	10464517	10464589	10464521	blind	5	13150413	0	0	-3.96508e-16
chr21	10464680	10464797	10464684	non_blind	5	13150417	0	0	-3.96508e-16
chr21	10464794	10465354	10465350	non_blind	3	13150418	0	0	-3.96508e-16
chr21	10466744	10467194	10467190	blind	3	13150422	0	0	0.213442
chr21	10467191	10467232	10467195	non_blind	5	13150423	0	0	0.213442
chr21	10471904	10471961	10471908	non_blind	5	13150445	0	0	0.213442
chr21	10481050	10481133	10481054	blind	5	13150489	0	0	0.213442
chr21	10483107	10483134	10483130	non_blind	3	13150492	0	0	0.213442
chr21	10511213	10511266	10511217	blind	5	13150655	0	0	0.213442
chr21	10511263	10511378	10511374	blind	3	13150658	0	0	0.213442
chr21	10512566	10512608	10512604	non_blind	3	13150668	0	0	0.213442
chr21	10528003	10528143	10528007	non_blind	5	13150731	0	0	0.213442
chr21	10530071	10530145	10530075	non_blind	5	13150737	0	0	0.213442
chr21	10536394	10536654	10536650	non_blind	3	13150752	5	4.48229	0.213442
chr21	10539415	10539450	10539446	non_blind	3	13150762	0	0	0.213442
chr21	10541116	10541190	10541120	non_blind	5	13150771	0	0	0.213442
chr21	10545627	10545665	10545631	non_blind	5	13150781	0	0	0.213442
chr21	10546922	10547051	10546926	non_blind	5	13150789	0	0	0.213442
chr21	10551373	10551471	10551467	non_blind	3	13150798	0	0	0.213442
chr21	10552085	10552120	10552116	non_blind	3	13150802	0	0	0.213442
chr21	10562621	10562765	10562761	non_blind	3	13150844	0	0	0.213442
chr21	10564652	10564758	10564754	non_blind	3	13150856	0	0	0.213442
chr21	10569415	10569554	10569419	non_blind	5	13150877	0	0	0.213442
chr21	10570041	10570098	10570094	non_blind	3	13150882	0	0	0.213442
chr21	10570285	10570408	10570404	non_blind	3	13150884	0	0	-3.80648e-16
chr21	10573273	10573436	10573432	blind	3	13150900	0	0	-3.80648e-16
chr21	10574096	10574199	10574100	blind	5	13150905	0	0	-3.80648e-16
chr21	10578645	10578965	10578961	non_blind	3	13150942	0	0	-3.80648e-16
chr21	10579629	10579716	10579712	non_blind	3	13150948	0	0	-3.80648e-16
chr21	10581758	10581840	10581836	blind	3	13150954	0	0	-3.80648e-16
chr21	10583305	10583601	10583309	non_blind	5	13150961	0	0	-3.80648e-16
chr21	10591871	10591942	10591875	blind	5	13150995	0	0	-3.80648e-16
chr21	10598026	10598109	10598030	non_blind	5	13151015	0	0	-3.80648e-16
chr21	10602204	10602273	10602269	non_blind	3	13151034	0	0	-3.80648e-16
chr21	10603056	10603089	10603085	non_blind	3	13151038	0	0	-3.80648e-16
chr21	10611988	10612036	10611992	non_blind	5	13151073	0	0	-3.80648e-16
chr21	10612043	10612084	10612047	non_blind	5	13151075	0	0	-3.80648e-16
chr21	10617045	10617712	10617708	non_blind	3	13151090	0	0	-3.80648e-16
chr21	10618930	10618983	10618979	blind	3	13151096	0	0	-3.80648e-16
chr21	10625660	10626048	10625664	non_blind	5	13151121	0	0	-3.80648e-16
chr21	10630134	10630173	10630138	non_blind	5	13151133	0	0	-3.80648e-16
chr21	10630708	10630981	10630712	non_blind	5	13151135	0	0	-3.80648e-16
chr21	10631849	10631893	10631889	non_blind	3	13151140	0	0	-3.80648e-16
chr21	10636028	10636070	10636066	blind	3	13151172	0	0	-3.80648e-16
chr21	10638509	10638609	10638605	blind	3	13151192	0	0	-3.80648e-16
chr21	10638606	10638981	10638610	non_blind	5	13151193	0	0	-3.80648e-16
chr21	10638994	10639459	10639455	non_blind	3	13151194	0	0	-3.80648e-16
chr21	10639456	10639481	10639460	non_blind	5	13151195	0	0	-3.80648e-16
chr21	10641425	10641529	10641525	blind	3	13151208	0	0	-3.80648e-16
chr21	10642003	10642096	10642007	non_blind	5	13151211	0	0	-3.80648e-16
chr21	10645587	10646081	10645591	blind	5	13151229	0	0	-3.80648e-16
chr21	10654651	10654729	10654725	non_blind	3	13151260	0	0	-3.80648e-16
chr21	10654726	10654748	10654730	non_blind	5	13151261	0	0	-3.80648e-16
chr21	10655646	10655762	10655758	non_blind	3	13151262	0	0	-3.80648e-16
chr21	10655759	10656165	10655763	blind	5	13151263	0	0	-3.80648e-16
chr21	10656162	10656292	10656166	non_blind	5	13151265	0	0	-3.80648e-16
chr21	10659646	10659757	10659650	non_blind	5	13151267	0	0	-3.80648e-16
chr21	10661841	10661996	10661992	non_blind	3	13151268	0	0	-3.80648e-16
chr21	10666060	10666228	10666224	non_blind	3	13151270	0	0	-3.80648e-16
chr21	10666225	10667627	10666229	blind	5	13151271	0	0	-3.80648e-16
chr21	10666225	10667627	10667623	blind	3	13151272	0	0	-3.80648e-16
chr21	10694523	10694804	10694527	non_blind	5	13151283	0	0	-3.80648e-16
chr21	10700407	10701017	10700411	non_blind	5	13151287	0	0	-3.80648e-16
chr21	10708671	10709773	10708675	non_blind	5	13151289	0	0	-3.80648e-16
chr21	10725621	10726048	10725625	non_blind	5	13151295	0	0	-3.80648e-16
chr21	10727430	10727647	10727434	non_blind	5	13151297	0	0	-3.80648e-16
chr21	10729429	10729641	10729433	non_blind	5	13151299	0	0	-3.80648e-16
chr21	10729638	10730411	10730407	non_blind	3	13151300	0	0	-3.80648e-16
chr21	10730408	10730596	10730412	non_blind	5	13151301	0	0	-3.80648e-16
chr21	10733153	10733509	10733505	non_blind	3	13151304	0	0	-3.80648e-16
chr21	10733506	10733847	10733510	non_blind	5	13151305	0	0	-3.80648e-16
chr21	10738196	10738229	10738225	non_blind	3	13151306	0	0	-3.80648e-16
chr21	10745635	10747089	10747085	non_blind	3	13151342	0	0	-3.80648e-16
chr21	10752599	10752972	10752603	non_blind	5	13151355	0	0	-3.80648e-16
chr21	10753115	10753463	10753119	non_blind	5	13151357	0	0	-3.80648e-16
chr21	10754002	10754723	10754719	non_blind	3	13151360	0	0	-3.80648e-16
chr21	10762201	10762710	10762706	non_blind	3	13151372	0	0	-3.80648e-16
chr21	10763181	10763925	10763921	non_blind	3	13151374	0	0	-3.80648e-16
chr21	10766482	10767616	10766486	non_blind	5	13151377	0	0	-3.80648e-16
chr21	10781971	10782475	10782471	non_blind	3	13151416	0	0	-3.80648e-16
chr21	10787700	10787897	10787893	non_blind	3	13151430	0	0	-3.80648e-16
chr21	10790170	10791180	10791176	blind	3	13151434	0	0	-3.80648e-16
chr21	10795476	10795650	10795480	blind	5	13151445	0	0	-3.80648e-16
chr21	10795687	10796455	10796451	non_blind	3	13151448	0	0	-3.80648e-16
chr21	10798336	10799023	10799019	blind	3	13151460	0	0	-3.80648e-16
chr21	10808709	10809143	10809139	non_blind	3	13151480	0	0	-3.80648e-16
chr21	10869351	10869596	10869592	non_blind	3	13151496	0	0	-3.80648e-16
chr21	10888962	10889358	10888966	non_blind	5	13151547	0	0	-3.80648e-16
chr21	11041435	11041583	11041439	non_blind	5	13151687	0	0	-3.80648e-16
chr21	11122396	11122515	11122511	non_blind	3	13151752	0	0	-3.80648e-16
chr21	11240689	11240901	11240897	non_blind	3	13151938	0	0	-3.80648e-16
chr21	11522772	11523214	11523210	non_blind	3	13152386	0	0	-3.80648e-16
chr21	11529255	11529691	11529687	non_blind	3	13152398	0	0	-3.80648e-16
chr21	11529688	11530030	11529692	blind	5	13152399	0	0	-3.80648e-16
chr21	11543664	11544260	11543668	non_blind	5	13152419	0	0	-3.80648e-16
chr21	11564134	11564729	11564138	non_blind	5	13152453	0	0	-3.80648e-16
chr21	11567446	11568223	11568219	non_blind	3	13152458	0	0	-3.80648e-16
chr21	11973958	11974553	11973962	non_blind	5	13153109	0	0	-3.80648e-16
chr21	12012749	12013523	12013519	non_blind	3	13153166	0	0	-3.80648e-16
chr21	12025804	12026400	12025808	non_blind	5	13153187	0	0	-3.80648e-16
chr21	12915010	12915075	12915071	non_blind	3	13154414	0	0	-3.80648e-16
chr21	12966713	12967058	12966717	non_blind	5	13154419	0	0	-3.80648e-16
chr21	12967335	12968265	12967339	non_blind	5	13154423	0	0	-3.80648e-16
chr21	12969264	12969438	12969268	blind	5	13154425	0	0	-3.80648e-16
chr21	12981946	12983316	12983312	blind	3	13154450	0	0	-3.80648e-16
chr21	12991029	12991860	12991033	non_blind	5	13154457	0	0	-3.80648e-16
chr21	13003068	13003178	13003072	non_blind	5	13154491	0	0	-3.80648e-16
chr21	13018024	13018117	13018028	non_blind	5	13154575	0	0	-3.80648e-16
chr21	13020986	13021247	13020990	non_blind	5	13154593	0	0	-3.80648e-16
chr21	13035735	13035885	13035739	non_blind	5	13154665	0	0	-3.80648e-16
chr21	13075563	13075603	13075567	non_blind	5	13154873	0	0	-3.80648e-16
chr21	13080248	13080306	13080302	blind	3	13154894	0	0	-3.80648e-16
chr21	13106254	13106303	13106258	non_blind	5	13154977	0	0	-3.80648e-16
chr21	13109507	13110048	13110044	non_blind	3	13154984	0	0	-3.80648e-16
chr21	13110264	13110473	13110469	blind	3	13154988	0	0	-3.80648e-16
chr21	13187910	13188070	13187914	non_blind	5	13155313	0	0	-3.80648e-16
chr21	13225959	13226185	13226181	non_blind	3	13155490	0	0	-3.80648e-16
chr21	13228929	13229323	13229319	non_blind	3	13155500	0	0	-3.80648e-16
chr21	13240640	13240885	13240881	non_blind	3	13155550	0	0	-3.80648e-16
chr21	13241315	13241351	13241319	blind	5	13155555	0	0	-3.80648e-16
chr21	13241348	13241540	13241352	non_blind	5	13155557	0	0	-3.80648e-16
chr21	13255387	13255471	13255391	blind	5	13155619	0	0	-3.80648e-16
chr21	13256600	13257411	13256604	blind	5	13155625	0	0	-3.80648e-16
chr21	13259226	13259252	13259230	non_blind	5	13155643	0	0	-3.80648e-16
chr21	13262934	13263091	13262938	non_blind	5	13155667	0	0	-3.80648e-16
chr21	13266562	13266617	13266613	blind	3	13155684	0	0	-3.80648e-16
chr21	13280593	13280640	13280636	non_blind	3	13155738	0	0	-3.80648e-16
chr21	13280637	13280744	13280641	non_blind	5	13155739	0	0	-3.80648e-16
chr21	13282252	13282335	13282331	non_blind	3	13155744	0	0	-3.80648e-16
chr21	13284422	13284509	13284426	non_blind	5	13155751	0	0	-3.80648e-16
chr21	13284620	13284683	13284679	blind	3	13155754	0	0	-3.80648e-16
chr21	13296880	13297049	13296884	blind	5	13155797	0	0	-3.80648e-16
chr21	13297589	13297664	13297593	non_blind	5	13155801	0	0	-3.80648e-16
chr21	13299745	13299949	13299945	non_blind	3	13155808	0	0	-3.80648e-16
chr21	13302671	13302743	13302675	blind	5	13155813	0	0	-3.80648e-16
chr21	13313015	13313282	13313278	non_blind	3	13155854	0	0	-3.80648e-16
chr21	13314520	13314585	13314581	non_blind	3	13155864	0	0	-3.80648e-16
chr21	13316454	13316531	13316527	non_blind	3	13155878	0	0	-3.80648e-16
chr21	13316528	13316637	13316633	blind	3	13155880	0	0	0.0426885
chr21	13319808	13319838	13319834	non_blind	3	13155904	0	0	0.0426885
chr21	13331966	13332062	13331970	non_blind	5	13155975	0	0	0.0426885
chr21	13333959	13334003	13333999	non_blind	3	13155982	0	0	0.0426885
chr21	13334328	13334456	13334332	non_blind	5	13155985	0	0	0.0426885
chr21	13341836	13342062	13341840	non_blind	5	13156007	0	0	0.0426885
chr21	13354279	13354380	13354283	non_blind	5	13156061	0	0	0.0426885
chr21	13363048	13363240	13363236	non_blind	3	13156094	0	0	0.0426885
chr21	13376807	13377021	13376811	blind	5	13156127	0	0	0.0426885
chr21	13381667	13382093	13381671	blind	5	13156137	0	0	0.0426885
chr21	13403415	13403459	13403455	non_blind	3	13156220	1	0.896458	0.128065
chr21	13405111	13405372	13405368	non_blind	3	13156230	0	0	0.128065
chr21	13407055	13407207	13407059	blind	5	13156247	0	0	0.128065
chr21	13407808	13407869	13407812	non_blind	5	13156251	0	0	0.128065
chr21	13407955	13407981	13407959	blind	5	13156253	0	0	0.128065
chr21	13407955	13407981	13407977	blind	3	13156254	0	0	0.128065
chr21	13407978	13408441	13407982	non_blind	5	13156255	0	0	0.128065
chr21	13411434	13411555	13411438	non_blind	5	13156277	0	0	0.128065
chr21	13414129	13414468	13414464	non_blind	3	13156284	0	0	0.128065
chr21	13420103	13420177	13420107	non_blind	5	13156319	0	0	0.128065
chr21	13422105	13422140	13422109	non_blind	5	13156329	2	1.79292	0.128065
chr21	13424079	13424186	13424182	non_blind	3	13156334	0	0	0.085377
chr21	13424299	13424466	13424303	non_blind	5	13156339	0	0	0.085377
chr21	13428113	13428379	13428375	non_blind	3	13156350	0	0	0.085377
chr21	13430676	13430945	13430680	non_blind	5	13156361	0	0	0.085377
chr21	13431188	13431242	13431238	non_blind	3	13156364	0	0	0.085377
chr21	13432508	13432558	13432554	non_blind	3	13156374	0	0	0.085377
chr21	13435212	13435304	13435300	non_blind	3	13156402	0	0	0.085377
chr21	13448072	13448302	13448076	non_blind	5	13156455	0	0	0.085377
chr21	13451061	13451125	13451121	non_blind	3	13156472	0	0	0.085377
chr21	13452413	13452740	13452736	blind	3	13156488	0	0	0.085377
chr21	13452737	13452995	13452741	blind	5	13156489	0	0	-3.80648e-16
chr21	13452992	13453088	13452996	non_blind	5	13156491	0	0	-3.80648e-16
chr21	13455933	13456328	13455937	non_blind	5	13156513	0	0	-3.80648e-16
chr21	13462923	13463372	13462927	non_blind	5	13156555	0	0	-3.80648e-16
chr21	13463731	13463881	13463735	non_blind	5	13156561	0	0	-3.80648e-16
chr21	13464389	13464995	13464991	blind	3	13156564	0	0	-3.80648e-16
chr21	13474614	13474698	13474618	non_blind	5	13156617	0	0	-3.80648e-16
chr21	13476265	13476447	13476443	non_blind	3	13156624	0	0	-3.80648e-16
chr21	13479249	13479719	13479715	non_blind	3	13156634	0	0	-3.80648e-16
chr21	13491168	13491307	13491303	non_blind	3	13156708	0	0	-3.80648e-16
chr21	13493881	13494011	13493885	blind	5	13156717	0	0	-3.80648e-16
chr21	13499784	13499837	13499788	non_blind	5	13156739	0	0	-3.80648e-16
chr21	13501730	13501955	13501951	blind	3	13156756	0	0	-3.80648e-16
chr21	13508434	13508697	13508438	blind	5	13156787	0	0	-3.80648e-16
chr21	13515875	13515901	13515879	non_blind	5	13156819	0	0	-3.80648e-16
chr21	13527085	13527262	13527089	non_blind	5	13156869	0	0	-3.80648e-16
chr21	13527884	13527963	13527959	non_blind	3	13156876	0	0	-3.80648e-16
chr21	13548272	13548502	13548498	non_blind	3	13156958	0	0	-3.80648e-16
chr21	13549774	13550112	13549778	non_blind	5	13156965	0	0	-3.80648e-16
chr21	13555409	13555558	13555413	non_blind	5	13156987	0	0	-3.80648e-16
chr21	13562216	13562523	13562220	non_blind	5	13157013	0	0	-3.80648e-16
chr21	13570347	13570407	13570351	non_blind	5	13157047	0	0	-3.80648e-16
chr21	13571984	13572044	13572040	blind	3	13157052	0	0	-3.80648e-16
chr21	13572041	13572165	13572045	blind	5	13157053	0	0	-3.80648e-16
chr21	13573645	13573765	13573649	non_blind	5	13157069	0	0	-3.80648e-16
chr21	13577333	13577432	13577428	blind	3	13157082	0	0	-3.80648e-16
chr21	13606075	13606141	13606079	blind	5	13157207	0	0	-3.80648e-16
chr21	13643399	13643423	13643419	non_blind	3	13157368	0	0	-3.80648e-16
chr21	13735777	13735841	13735781	non_blind	5	13157767	0	0	0.0426885
chr21	13799384	13799516	13799512	non_blind	3	13158060	0	0	0.0426885
chr21	13802089	13802260	13802256	non_blind	3	13158078	0	0	0.0426885
chr21	13806638	13807033	13807029	non_blind	3	13158110	0	0	0.0426885
chr21	13807093	13807334	13807330	blind	3	13158114	0	0	0.0426885
chr21	13809477	13809772	13809768	non_blind	3	13158142	0	0	0.0426885
chr21	13810002	13810075	13810006	non_blind	5	13158145	0	0	0.0426885
chr21	13810898	13811026	13810902	blind	5	13158153	0	0	0.0426885
chr21	13814904	13815027	13815023	non_blind	3	13158170	0	0	0.0426885
chr21	13823894	13824438	13824434	non_blind	3	13158222	0	0	0.0426885
chr21	13824435	13824617	13824439	non_blind	5	13158223	1	0.896458	0.0426885
chr21	13825163	13825271	13825267	non_blind	3	13158228	0	0	0.0426885
chr21	13825302	13825555	13825306	non_blind	5	13158231	0	0	0.0426885
chr21	13827652	13827762	13827758	non_blind	3	13158238	0	0	0.0426885
chr21	13827835	13827931	13827839	non_blind	5	13158241	0	0	0.0426885
chr21	13834499	13834546	13834503	blind	5	13158269	0	0	0.0426885
chr21	13846567	13846743	13846571	non_blind	5	13158325	0	0	0.0426885
chr21	13848065	13848116	13848069	non_blind	5	13158335	0	0	0.0426885
chr21	13848741	13848805	13848745	non_blind	5	13158339	0	0	0.0426885
chr21	13849084	13849317	13849313	blind	3	13158342	0	0	0.0426885
chr21	13850429	13850571	13850567	non_blind	3	13158348	0	0	0.298819
chr21	13851664	13851945	13851668	non_blind	5	13158365	0	0	0.256131
chr21	13854814	13855033	13854818	non_blind	5	13158371	0	0	0.256131
chr21	13860579	13860726	13860583	blind	5	13158387	0	0	0.256131
chr21	13861576	13861897	13861580	non_blind	5	13158403	0	0	0.256131
chr21	13862560	13862874	13862870	non_blind	3	13158404	0	0	0.256131
chr21	13867019	13867107	13867103	blind	3	13158422	0	0	0.256131
chr21	13870355	13870491	13870487	blind	3	13158446	0	0	0.256131
chr21	13878163	13878247	13878243	non_blind	3	13158470	0	0	0.256131
chr21	13880071	13880160	13880156	non_blind	3	13158474	0	0	0.256131
chr21	13883370	13883474	13883470	non_blind	3	13158496	6	5.37875	0.256131
chr21	13883471	13883576	13883475	non_blind	5	13158497	0	0	0.256131
chr21	13883815	13884040	13883819	non_blind	5	13158499	0	0	0.256131
chr21	13884335	13884660	13884339	non_blind	5	13158501	0	0	0.256131
chr21	13888487	13888517	13888513	non_blind	3	13158528	0	0	0.256131
chr21	13894563	13894627	13894623	non_blind	3	13158548	0	0	0.256131
chr21	13905365	13905540	13905369	non_blind	5	13158595	0	0	0.256131
chr21	13913351	13913549	13913545	non_blind	3	13158610	0	0	0.256131
chr21	13919498	13919551	13919547	blind	3	13158640	0	0	0.256131
chr21	13919548	13919727	13919552	blind	5	13158641	0	0	0.256131
chr21	13920044	13920344	13920048	blind	5	13158647	0	0	0.256131
chr21	13925405	13925605	13925601	blind	3	13158672	0	0	-3.80648e-16
chr21	13927357	13927874	13927870	non_blind	3	13158684	0	0	-3.80648e-16
chr21	13979902	13980053	13980049	non_blind	3	13158906	0	0	-3.80648e-16
chr21	13981874	13981997	13981878	non_blind	5	13158915	0	0	-3.80648e-16
chr21	13985335	13985502	13985498	non_blind	3	13158928	0	0	-3.80648e-16
chr21	13985580	13985613	13985584	non_blind	5	13158931	0	0	-3.80648e-16
chr21	14000414	14000519	14000418	blind	5	13159007	0	0	-3.80648e-16
chr21	14003591	14003675	14003671	blind	3	13159028	0	0	-3.80648e-16
chr21	14003998	14004024	14004002	non_blind	5	13159035	0	0	-3.80648e-16
chr21	14004521	14005153	14004525	non_blind	5	13159037	0	0	-3.80648e-16
chr21	14007514	14007558	14007518	non_blind	5	13159045	0	0	-3.80648e-16
chr21	14008232	14008461	14008236	blind	5	13159047	0	0	-3.80648e-16
chr21	14019372	14019431	14019427	non_blind	3	13159094	0	0	-3.80648e-16
chr21	14020066	14020176	14020172	blind	3	13159100	0	0	-3.80648e-16
chr21	14024783	14025352	14025348	non_blind	3	13159122	0	0	-3.80648e-16
chr21	14025349	14025478	14025353	non_blind	5	13159123	0	0	-3.80648e-16
chr21	14025840	14026207	14026203	non_blind	3	13159124	0	0	-3.80648e-16
chr21	14026214	14026349	14026345	non_blind	3	13159126	0	0	-3.80648e-16
chr21	14026346	14026480	14026350	blind	5	13159127	0	0	-3.80648e-16
chr21	14026935	14026968	14026964	non_blind	3	13159132	0	0	-3.80648e-16
chr21	14032896	14032976	14032900	blind	5	13159161	0	0	-3.80648e-16
chr21	14034937	14035032	14035028	non_blind	3	13159176	0	0	-3.80648e-16
chr21	14035029	14035135	14035033	blind	5	13159177	0	0	-3.80648e-16
chr21	14035029	14035135	14035131	blind	3	13159178	0	0	-3.80648e-16
chr21	14035132	14035191	14035136	blind	5	13159179	0	0	-3.80648e-16
chr21	14035132	14035191	14035187	blind	3	13159180	0	0	-3.80648e-16
chr21	14035188	14035323	14035192	non_blind	5	13159181	0	0	-3.80648e-16
chr21	14035877	14036231	14036227	non_blind	3	13159182	0	0	-3.80648e-16
chr21	14036572	14036921	14036917	non_blind	3	13159184	0	0	-3.80648e-16
chr21	14036918	14036975	14036922	non_blind	5	13159185	0	0	-3.80648e-16
chr21	14037615	14038087	14038083	non_blind	3	13159186	0	0	-3.80648e-16
chr21	14039636	14039804	14039800	non_blind	3	13159188	0	0	-3.80648e-16
chr21	14039801	14039873	14039805	non_blind	5	13159189	0	0	-3.80648e-16
chr21	14040146	14040297	14040150	non_blind	5	13159191	0	0	-3.80648e-16
chr21	14041782	14041841	14041786	blind	5	13159193	0	0	-3.80648e-16
chr21	14042145	14042206	14042202	non_blind	3	13159196	0	0	-3.80648e-16
chr21	14042203	14042301	14042207	blind	5	13159197	0	0	-3.80648e-16
chr21	14042203	14042301	14042297	blind	3	13159198	0	0	-3.80648e-16
chr21	14042321	14042709	14042705	non_blind	3	13159200	0	0	-3.80648e-16
chr21	14043044	14043185	14043048	blind	5	13159203	0	0	-3.80648e-16
chr21	14043182	14043711	14043186	non_blind	5	13159205	0	0	-3.80648e-16
chr21	14045076	14045827	14045080	non_blind	5	13159211	0	0	0.256131
chr21	14045893	14046070	14046066	non_blind	3	13159212	0	0	0.256131
chr21	14046067	14046109	14046071	non_blind	5	13159213	0	0	0.256131
chr21	14046106	14046855	14046851	non_blind	3	13159214	0	0	0.256131
chr21	14046852	14046975	14046971	blind	3	13159216	0	0	0.256131
chr21	14047073	14047403	14047399	non_blind	3	13159218	0	0	0.256131
chr21	14048298	14048423	14048302	blind	5	13159223	0	0	0.256131
chr21	14048298	14048423	14048419	blind	3	13159224	0	0	0.256131
chr21	14048420	14048444	14048424	non_blind	5	13159225	0	0	0.256131
chr21	14049087	14049171	14049167	non_blind	3	13159226	0	0	0.256131
chr21	14049304	14049338	14049334	non_blind	3	13159228	6	5.37875	0.256131
chr21	14049335	14049708	14049339	blind	5	13159229	0	0	0.256131
chr21	14050034	14050374	14050370	non_blind	3	13159232	0	0	0.256131
chr21	14050371	14050518	14050375	blind	5	13159233	0	0	0.341508
chr21	14050371	14050518	14050514	blind	3	13159234	0	0	0.341508
chr21	14050515	14050679	14050519	blind	5	13159235	0	0	0.341508
chr21	14050515	14050679	14050675	blind	3	13159236	0	0	0.341508
chr21	14050873	14050938	14050877	non_blind	5	13159239	0	0	0.341508
chr21	14051302	14051606	14051306	non_blind	5	13159243	0	0	0.341508
chr21	14051673	14051715	14051711	non_blind	3	13159244	0	0	0.341508
chr21	14051712	14051853	14051716	blind	5	13159245	0	0	0.341508
chr21	14051850	14051954	14051950	blind	3	13159248	0	0	0.085377
chr21	14052984	14053020	14052988	non_blind	5	13159253	0	0	0.085377
chr21	14053143	14053180	14053147	non_blind	5	13159255	2	1.79292	0.085377
chr21	14053628	14054056	14054052	non_blind	3	13159262	0	0	0.085377
chr21	14055627	14055713	14055709	non_blind	3	13159266	0	0	0.085377
chr21	14055710	14055778	14055714	non_blind	5	13159267	0	0	0.085377
chr21	14056721	14056859	14056855	non_blind	3	13159270	0	0	0.085377
chr21	14062251	14062375	14062371	non_blind	3	13159284	0	0	0.085377
chr21	14064144	14064161	14064148	blind	5	13159295	0	0	0.085377
chr21	14064144	14064161	14064157	blind	3	13159296	0	0	0.085377
chr21	14064432	14064769	14064436	non_blind	5	13159303	0	0	0.085377
chr21	14066218	14066472	14066222	non_blind	5	13159307	0	0	0.085377
chr21	14070179	14070249	14070183	non_blind	5	13159319	0	0	0.085377
chr21	14070649	14070778	14070774	non_blind	3	13159320	0	0	-3.70074e-16
chr21	14070775	14071826	14070779	non_blind	5	13159321	0	0	-3.70074e-16
chr21	14072819	14073196	14072823	non_blind	5	13159323	0	0	-3.70074e-16
chr21	14075056	14075124	14075120	non_blind	3	13159324	0	0	-3.70074e-16
chr21	14075438	14075505	14075501	non_blind	3	13159326	0	0	-3.70074e-16
chr21	14075505	14075567	14075563	non_blind	3	13159328	0	0	-3.70074e-16
chr21	14075564	14075721	14075568	non_blind	5	13159329	0	0	-3.70074e-16
chr21	14076300	14076671	14076304	non_blind	5	13159333	0	0	-3.70074e-16
chr21	14076688	14076857	14076853	non_blind	3	13159334	0	0	-3.70074e-16
chr21	14077482	14078746	14078742	non_blind	3	13159336	0	0	-3.70074e-16
chr21	14078743	14078976	14078747	non_blind	5	13159337	0	0	-3.70074e-16
chr21	14079861	14079905	14079865	blind	5	13159341	0	0	-3.70074e-16
chr21	14079960	14080343	14080339	non_blind	3	13159344	0	0	-3.70074e-16
chr21	14080340	14080389	14080344	non_blind	5	13159345	0	0	-3.70074e-16
chr21	14082045	14082130	14082126	blind	3	13159354	0	0	-3.70074e-16
chr21	14082127	14082245	14082131	non_blind	5	13159355	0	0	-3.70074e-16
chr21	14082242	14082359	14082355	non_blind	3	13159356	0	0	-3.70074e-16
chr21	14082356	14082495	14082360	blind	5	13159357	0	0	-3.70074e-16
chr21	14082356	14082495	14082491	blind	3	13159358	0	0	-3.70074e-16
chr21	14082492	14082737	14082496	non_blind	5	13159359	0	0	-3.70074e-16
chr21	14082805	14082928	14082924	non_blind	3	13159360	0	0	-3.70074e-16
chr21	14083618	14083741	14083737	non_blind	3	13159364	0	0	-3.70074e-16
chr21	14083738	14083802	14083742	blind	5	13159365	0	0	-3.70074e-16
chr21	14083799	14083872	14083803	non_blind	5	13159367	0	0	-3.70074e-16
chr21	14083916	14084041	14084037	non_blind	3	13159370	0	0	-3.70074e-16
chr21	14084038	14084174	14084042	non_blind	5	13159371	0	0	-3.70074e-16
chr21	14084590	14084682	14084678	non_blind	3	13159372	0	0	-3.70074e-16
chr21	14086414	14086500	14086496	blind	3	13159388	0	0	-3.70074e-16
chr21	14087236	14087350	14087346	blind	3	13159394	0	0	-3.70074e-16
chr21	14087592	14087622	14087618	non_blind	3	13159400	0	0	-3.70074e-16
chr21	14087619	14087842	14087623	blind	5	13159401	0	0	-3.70074e-16
chr21	14089303	14089401	14089397	blind	3	13159412	0	0	-3.70074e-16
chr21	14089398	14089578	14089402	blind	5	13159413	0	0	-3.70074e-16
chr21	14089575	14089690	14089579	non_blind	5	13159415	0	0	-3.70074e-16
chr21	14090141	14090208	14090204	non_blind	3	13159416	0	0	-3.70074e-16
chr21	14091206	14091248	14091244	blind	3	13159422	0	0	-3.70074e-16
chr21	14091245	14091317	14091313	blind	3	13159424	0	0	-3.70074e-16
chr21	14091428	14091510	14091432	blind	5	13159427	0	0	0.0426885
chr21	14091428	14091510	14091506	blind	3	13159428	0	0	0.0426885
chr21	14091726	14091766	14091762	non_blind	3	13159430	0	0	0.0426885
chr21	14091799	14092218	14091803	non_blind	5	13159433	0	0	0.0426885
chr21	14095645	14095822	14095818	non_blind	3	13159446	0	0	0.0426885
chr21	14095844	14095871	14095848	non_blind	5	13159449	0	0	0.0426885
chr21	14095967	14096196	14096192	non_blind	3	13159450	0	0	0.0426885
chr21	14096193	14096522	14096197	non_blind	5	13159451	0	0	0.0426885
chr21	14096519	14096627	14096623	non_blind	3	13159452	0	0	0.0426885
chr21	14096664	14096728	14096724	blind	3	13159456	0	0	0.0426885
chr21	14096747	14096951	14096947	non_blind	3	13159458	1	0.896458	0.0426885
chr21	14096948	14097040	14096952	non_blind	5	13159459	0	0	0.0426885
chr21	14097562	14097603	14097599	non_blind	3	13159466	0	0	0.0426885
chr21	14098907	14099141	14099137	non_blind	3	13159472	0	0	0.0426885
chr21	14099873	14099922	14099877	non_blind	5	13159475	0	0	0.0426885
chr21	14100041	14100109	14100045	non_blind	5	13159477	0	0	0.0426885
chr21	14100374	14100458	14100454	non_blind	3	13159486	0	0	0.0426885
chr21	14101670	14101826	14101674	blind	5	13159495	0	0	0.0426885
chr21	14101823	14101842	14101827	blind	5	13159497	0	0	0.0426885
chr21	14101823	14101842	14101838	blind	3	13159498	0	0	0.0426885
chr21	14101839	14101978	14101843	non_blind	5	13159499	0	0	0.0426885
chr21	14102708	14103542	14102712	non_blind	5	13159501	0	0	-3.70074e-16
chr21	14104098	14104225	14104221	blind	3	13159508	0	0	-3.70074e-16
chr21	14105321	14105406	14105325	non_blind	5	13159513	0	0	-3.70074e-16
chr21	14107732	14108046	14108042	non_blind	3	13159522	0	0	-3.70074e-16
chr21	14108043	14108434	14108047	blind	5	13159523	0	0	-3.70074e-16
chr21	14108043	14108434	14108430	blind	3	13159524	0	0	-3.70074e-16
chr21	14108431	14109015	14108435	non_blind	5	13159525	0	0	-3.70074e-16
chr21	14109171	14109228	14109224	non_blind	3	13159526	0	0	-3.70074e-16
chr21	14109225	14109419	14109229	non_blind	5	13159527	0	0	-3.70074e-16
chr21	14109886	14110114	14110110	non_blind	3	13159528	0	0	-3.70074e-16
chr21	14110111	14110398	14110115	non_blind	5	13159529	0	0	-3.70074e-16
chr21	14110786	14110851	14110847	non_blind	3	13159532	0	0	-3.70074e-16
chr21	14112414	14112473	14112418	non_blind	5	13159537	0	0	-3.70074e-16
chr21	14112948	14113192	14113188	non_blind	3	13159538	0	0	-3.70074e-16
chr21	14113189	14113341	14113193	blind	5	13159539	0	0	-3.70074e-16
chr21	14113189	14113341	14113337	blind	3	13159540	0	0	-3.70074e-16
chr21	14113338	14113364	14113342	non_blind	5	13159541	0	0	-3.70074e-16
chr21	14113361	14113566	14113562	non_blind	3	13159542	0	0	-3.70074e-16
chr21	14113563	14113788	14113567	non_blind	5	13159543	0	0	-3.70074e-16
chr21	14113818	14113903	14113899	non_blind	3	13159544	0	0	-3.70074e-16
chr21	14115023	14115329	14115325	non_blind	3	13159552	0	0	-3.70074e-16
chr21	14115502	14115818	14115506	blind	5	13159557	0	0	-3.70074e-16
chr21	14115815	14116149	14115819	non_blind	5	13159559	0	0	-3.70074e-16
chr21	14116263	14116706	14116267	blind	5	13159561	0	0	-3.70074e-16
chr21	14116263	14116706	14116702	blind	3	13159562	0	0	-3.70074e-16
chr21	14117119	14117155	14117151	non_blind	3	13159564	0	0	-3.70074e-16
chr21	14117429	14117481	14117477	non_blind	3	13159566	0	0	-3.70074e-16
chr21	14117478	14117708	14117482	non_blind	5	13159567	0	0	-3.70074e-16
chr21	14118029	14118165	14118033	blind	5	13159571	0	0	-3.70074e-16
chr21	14118029	14118165	14118161	blind	3	13159572	0	0	-3.70074e-16
chr21	14118173	14118225	14118177	blind	5	13159575	0	0	-3.70074e-16
chr21	14118173	14118225	14118221	blind	3	13159576	0	0	-3.70074e-16
chr21	14118222	14118525	14118226	blind	5	13159577	0	0	-3.70074e-16
chr21	14118222	14118525	14118521	blind	3	13159578	0	0	-3.70074e-16
chr21	14118522	14118625	14118526	non_blind	5	13159579	0	0	-3.70074e-16
chr21	14118622	14118801	14118797	non_blind	3	13159580	0	0	-3.70074e-16
chr21	14118798	14118899	14118802	non_blind	5	13159581	0	0	-3.70074e-16
chr21	14119243	14119379	14119375	non_blind	3	13159582	0	0	-3.70074e-16
chr21	14119376	14119431	14119380	non_blind	5	13159583	0	0	-3.70074e-16
chr21	14119428	14119538	14119534	non_blind	3	13159584	0	0	-3.70074e-16
chr21	14119535	14119688	14119539	non_blind	5	13159585	0	0	-3.70074e-16
chr21	14120989	14121079	14121075	non_blind	3	13159588	0	0	-3.70074e-16
chr21	14121076	14121111	14121080	non_blind	5	13159589	0	0	-3.70074e-16
chr21	14121108	14121229	14121225	non_blind	3	13159590	0	0	-3.70074e-16
chr21	14121226	14121356	14121230	blind	5	13159591	0	0	-3.70074e-16
chr21	14121682	14121730	14121726	non_blind	3	13159594	0	0	-3.70074e-16
chr21	14121727	14121789	14121731	blind	5	13159595	0	0	-3.70074e-16
chr21	14121727	14121789	14121785	blind	3	13159596	0	0	-3.70074e-16
chr21	14121809	14121959	14121813	non_blind	5	13159601	0	0	-3.70074e-16
chr21	14122053	14122122	14122118	non_blind	3	13159602	0	0	-3.70074e-16
chr21	14122119	14122270	14122123	non_blind	5	13159603	0	0	-3.70074e-16
chr21	14122311	14122338	14122334	non_blind	3	13159604	0	0	-3.70074e-16
chr21	14122335	14122588	14122339	blind	5	13159605	0	0	-3.70074e-16
chr21	14122335	14122588	14122584	blind	3	13159606	0	0	-3.70074e-16
chr21	14122585	14122646	14122589	non_blind	5	13159607	0	0	-3.70074e-16
chr21	14122725	14122808	14122804	non_blind	3	13159608	0	0	-3.70074e-16
chr21	14122805	14122908	14122809	blind	5	13159609	0	0	-3.70074e-16
chr21	14123187	14123239	14123235	non_blind	3	13159614	0	0	-3.70074e-16
chr21	14123236	14123406	14123240	blind	5	13159615	0	0	-3.70074e-16
chr21	14123236	14123406	14123402	blind	3	13159616	0	0	-3.70074e-16
chr21	14123403	14123704	14123407	blind	5	13159617	0	0	-3.70074e-16
chr21	14123403	14123704	14123700	blind	3	13159618	0	0	-3.70074e-16
chr21	14123729	14123772	14123768	non_blind	3	13159620	0	0	-3.70074e-16
chr21	14123769	14123803	14123773	blind	5	13159621	0	0	-3.70074e-16
chr21	14123769	14123803	14123799	blind	3	13159622	0	0	-3.70074e-16
chr21	14123800	14123986	14123804	non_blind	5	13159623	0	0	-3.70074e-16
chr21	14124044	14124219	14124215	non_blind	3	13159624	0	0	-3.70074e-16
chr21	14124216	14124328	14124220	non_blind	5	13159625	0	0	-3.70074e-16
chr21	14124619	14124744	14124623	blind	5	13159627	0	0	-3.70074e-16
chr21	14125793	14125937	14125933	blind	3	13159636	0	0	-3.70074e-16
chr21	14125934	14125962	14125938	non_blind	5	13159637	0	0	-3.70074e-16
chr21	14126512	14126562	14126516	non_blind	5	13159639	0	0	-3.70074e-16
chr21	14127180	14127289	14127285	non_blind	3	13159640	0	0	-3.70074e-16
chr21	14127286	14127357	14127290	blind	5	13159641	0	0	-3.70074e-16
chr21	14127286	14127357	14127353	blind	3	13159642	0	0	-3.70074e-16
chr21	14127601	14127939	14127935	non_blind	3	13159644	0	0	-3.70074e-16
chr21	14127936	14128035	14127940	non_blind	5	13159645	0	0	-3.70074e-16
chr21	14128697	14128860	14128856	non_blind	3	13159646	0	0	-3.70074e-16
chr21	14128857	14128907	14128861	blind	5	13159647	0	0	-3.70074e-16
chr21	14128857	14128907	14128903	blind	3	13159648	0	0	-3.70074e-16
chr21	14128904	14129653	14128908	non_blind	5	13159649	0	0	-3.70074e-16
chr21	14129650	14130059	14130055	non_blind	3	13159650	0	0	-3.70074e-16
chr21	14130056	14130506	14130060	non_blind	5	13159651	0	0	-3.70074e-16
chr21	14130503	14130722	14130718	non_blind	3	13159652	0	0	-3.70074e-16
chr21	14130719	14130831	14130723	non_blind	5	13159653	0	0	-3.70074e-16
chr21	14130891	14131017	14130895	blind	5	13159655	0	0	-3.70074e-16
chr21	14131647	14131708	14131704	non_blind	3	13159664	0	0	-3.70074e-16
chr21	14131705	14132075	14131709	non_blind	5	13159665	0	0	-3.70074e-16
chr21	14132072	14132125	14132121	non_blind	3	13159666	0	0	-3.70074e-16
chr21	14132122	14132195	14132126	non_blind	5	13159667	0	0	-3.70074e-16
chr21	14132192	14132576	14132572	non_blind	3	13159668	0	0	-3.70074e-16
chr21	14132582	14132783	14132779	non_blind	3	13159670	0	0	-3.70074e-16
chr21	14132780	14132849	14132784	blind	5	13159671	0	0	-3.70074e-16
chr21	14133101	14133294	14133290	non_blind	3	13159674	0	0	-3.70074e-16
chr21	14133332	14133396	14133392	non_blind	3	13159676	0	0	-3.70074e-16
chr21	14133836	14134029	14133840	blind	5	13159679	0	0	-3.70074e-16
chr21	14134599	14134657	14134653	blind	3	13159688	0	0	-3.70074e-16
chr21	14135568	14135802	14135572	non_blind	5	13159691	0	0	-3.70074e-16
chr21	14136319	14136621	14136323	blind	5	13159693	0	0	-3.70074e-16
chr21	14136319	14136621	14136617	blind	3	13159694	0	0	-3.70074e-16
chr21	14136618	14136955	14136622	blind	5	13159695	0	0	-3.70074e-16
chr21	14136952	14137051	14137047	blind	3	13159698	0	0	-3.70074e-16
chr21	14137048	14137206	14137052	non_blind	5	13159699	0	0	-3.70074e-16
chr21	14137688	14137928	14137692	non_blind	5	13159703	0	0	-3.70074e-16
chr21	14138163	14138818	14138814	non_blind	3	13159704	0	0	-3.70074e-16
chr21	14138815	14139405	14138819	non_blind	5	13159705	0	0	-3.70074e-16
chr21	14139443	14139859	14139855	non_blind	3	13159706	0	0	-3.70074e-16
chr21	14139856	14139981	14139860	non_blind	5	13159707	0	0	-3.70074e-16
chr21	14140934	14141137	14141133	non_blind	3	13159708	0	0	-3.70074e-16
chr21	14141134	14141707	14141138	non_blind	5	13159709	0	0	-3.70074e-16
chr21	14142722	14142955	14142726	non_blind	5	13159711	0	0	-3.70074e-16
chr21	14143236	14143696	14143240	non_blind	5	13159713	0	0	-3.70074e-16
chr21	14143903	14144110	14144106	non_blind	3	13159714	0	0	-3.70074e-16
chr21	14144107	14144208	14144111	non_blind	5	13159715	0	0	-3.70074e-16
chr21	14145907	14146010	14145911	non_blind	5	13159719	0	0	-3.70074e-16
chr21	14147015	14147069	14147019	non_blind	5	13159721	0	0	-3.70074e-16
chr21	14147408	14147622	14147618	non_blind	3	13159722	0	0	-3.70074e-16
chr21	14147619	14147682	14147623	non_blind	5	13159723	0	0	-3.70074e-16
chr21	14147809	14147881	14147877	non_blind	3	13159724	0	0	-3.70074e-16
chr21	14147888	14148138	14148134	non_blind	3	13159726	0	0	-3.70074e-16
chr21	14148135	14148186	14148139	non_blind	5	13159727	0	0	-3.70074e-16
chr21	14148183	14148268	14148264	non_blind	3	13159728	0	0	-3.70074e-16
chr21	14148265	14148352	14148269	blind	5	13159729	0	0	-3.70074e-16
chr21	14148265	14148352	14148348	blind	3	13159730	0	0	-3.70074e-16
chr21	14148349	14148427	14148353	non_blind	5	13159731	0	0	-3.70074e-16
chr21	14149278	14149459	14149282	non_blind	5	13159733	0	0	-3.70074e-16
chr21	14149935	14150069	14149939	non_blind	5	13159737	0	0	0.128065
chr21	14150344	14150429	14150425	non_blind	3	13159738	0	0	0.128065
chr21	14150426	14150471	14150430	non_blind	5	13159739	0	0	0.128065
chr21	14150468	14150530	14150526	non_blind	3	13159740	0	0	0.128065
chr21	14150527	14150642	14150531	blind	5	13159741	0	0	0.128065
chr21	14150527	14150642	14150638	blind	3	13159742	0	0	0.128065
chr21	14152301	14152439	14152435	non_blind	3	13159744	0	0	0.298819
chr21	14152436	14152895	14152440	non_blind	5	13159745	0	0	0.298819
chr21	14152892	14152954	14152950	non_blind	3	13159746	0	0	0.298819
chr21	14152951	14153035	14152955	blind	5	13159747	0	0	0.298819
chr21	14152951	14153035	14153031	blind	3	13159748	3	2.68937	0.768393
chr21	14153032	14153526	14153036	non_blind	5	13159749	0	0	0.768393
chr21	14154073	14154700	14154696	non_blind	3	13159750	0	0	0.768393
chr21	14154707	14154863	14154859	non_blind	3	13159752	0	0	0.768393
chr21	14154860	14154904	14154864	blind	5	13159753	0	0	0.768393
chr21	14154860	14154904	14154900	blind	3	13159754	0	0	0.768393
chr21	14154901	14155051	14154905	non_blind	5	13159755	4	3.58583	0.768393
chr21	14155215	14155337	14155333	non_blind	3	13159756	0	0	0.768393
chr21	14155334	14155415	14155338	non_blind	5	13159757	0	0	0.768393
chr21	14157383	14157505	14157501	non_blind	3	13159758	0	0	0.768393
chr21	14157502	14157722	14157506	non_blind	5	13159759	11	9.86104	0.768393
chr21	14157820	14158112	14158108	non_blind	3	13159760	0	0	0.640327
chr21	14158109	14158158	14158113	non_blind	5	13159761	0	0	0.640327
chr21	14158193	14158351	14158197	non_blind	5	13159763	0	0	0.640327
chr21	14158682	14159085	14159081	non_blind	3	13159764	0	0	0.640327
chr21	14159082	14159407	14159086	blind	5	13159765	0	0	0.640327
chr21	14159082	14159407	14159403	blind	3	13159766	0	0	0.640327
chr21	14159404	14159640	14159408	non_blind	5	13159767	0	0	0.469573
chr21	14159637	14159825	14159821	non_blind	3	13159768	0	0	0.469573
chr21	14159822	14159938	14159826	blind	5	13159769	0	0	0.469573
chr21	14159822	14159938	14159934	blind	3	13159770	0	0	0.469573
chr21	14159935	14160015	14159939	non_blind	5	13159771	0	0	-3.38354e-16
chr21	14160031	14160167	14160163	non_blind	3	13159772	0	0	-3.38354e-16
chr21	14160177	14160641	14160637	non_blind	3	13159774	0	0	-3.38354e-16
chr21	14160638	14160683	14160642	non_blind	5	13159775	0	0	-3.38354e-16
chr21	14160680	14160740	14160736	non_blind	3	13159776	0	0	-3.38354e-16
chr21	14160737	14161006	14160741	blind	5	13159777	0	0	-3.38354e-16
chr21	14160737	14161006	14161002	blind	3	13159778	0	0	-3.38354e-16
chr21	14161003	14161423	14161007	non_blind	5	13159779	0	0	-3.38354e-16
chr21	14161420	14161485	14161481	non_blind	3	13159780	0	0	-3.38354e-16
chr21	14161482	14162085	14161486	blind	5	13159781	0	0	-3.38354e-16
chr21	14161482	14162085	14162081	blind	3	13159782	0	0	-3.38354e-16
chr21	14162082	14162175	14162086	non_blind	5	13159783	0	0	-3.38354e-16
chr21	14163131	14163255	14163251	non_blind	3	13159784	0	0	-3.38354e-16
chr21	14163252	14163318	14163256	non_blind	5	13159785	0	0	-3.38354e-16
chr21	14163315	14163606	14163602	non_blind	3	13159786	0	0	-3.38354e-16
chr21	14163603	14163631	14163607	blind	5	13159787	0	0	-3.38354e-16
chr21	14163603	14163631	14163627	blind	3	13159788	0	0	-3.38354e-16
chr21	14164367	14164465	14164461	non_blind	3	13159790	0	0	-3.38354e-16
chr21	14164462	14164560	14164466	non_blind	5	13159791	0	0	-3.38354e-16
chr21	14164598	14164779	14164602	non_blind	5	13159793	0	0	0.426885
chr21	14164818	14165016	14165012	non_blind	3	13159794	0	0	0.426885
chr21	14165750	14166043	14166039	non_blind	3	13159796	0	0	0.426885
chr21	14166040	14166075	14166044	non_blind	5	13159797	0	0	0.426885
chr21	14166884	14166939	14166935	non_blind	3	13159798	0	0	0.426885
chr21	14173051	14173238	14173234	non_blind	3	13159838	0	0	0.426885
chr21	14173245	14173374	14173249	non_blind	5	13159841	0	0	0.426885
chr21	14173371	14173418	14173414	non_blind	3	13159842	0	0	0.426885
chr21	14173415	14173611	14173419	non_blind	5	13159843	0	0	0.426885
chr21	14174213	14174267	14174263	non_blind	3	13159844	0	0	0.426885
chr21	14174264	14174351	14174268	non_blind	5	13159845	10	8.96458	0.426885
chr21	14174633	14174703	14174637	non_blind	5	13159849	0	0	0.426885
chr21	14177039	14177606	14177043	non_blind	5	13159859	0	0	0.426885
chr21	14179392	14179439	14179396	blind	5	13159861	0	0	0.426885
chr21	14179392	14179439	14179435	blind	3	13159862	0	0	0.426885
chr21	14179436	14180061	14179440	blind	5	13159863	0	0	0.426885
chr21	14179436	14180061	14180057	blind	3	13159864	0	0	0.426885
chr21	14180786	14180858	14180854	non_blind	3	13159868	0	0	0.426885
chr21	14180855	14181438	14180859	non_blind	5	13159869	0	0	0.426885
chr21	14181450	14181479	14181454	non_blind	5	13159871	0	0	0.426885
chr21	14186309	14186520	14186516	non_blind	3	13159884	0	0	0.426885
chr21	14186517	14186721	14186521	non_blind	5	13159885	0	0	-3.38354e-16
chr21	14186735	14186777	14186773	non_blind	3	13159886	0	0	-3.38354e-16
chr21	14186774	14186798	14186778	non_blind	5	13159887	0	0	-3.38354e-16
chr21	14186795	14187036	14187032	non_blind	3	13159888	0	0	-3.38354e-16
chr21	14187033	14187145	14187037	blind	5	13159889	0	0	-3.38354e-16
chr21	14187033	14187145	14187141	blind	3	13159890	0	0	-3.38354e-16
chr21	14187142	14187238	14187146	non_blind	5	13159891	0	0	-3.38354e-16
chr21	14187235	14187293	14187289	non_blind	3	13159892	0	0	-3.38354e-16
chr21	14187421	14187760	14187756	non_blind	3	13159894	0	0	-3.38354e-16
chr21	14187757	14187839	14187761	non_blind	5	13159895	0	0	-3.38354e-16
chr21	14188140	14188220	14188144	blind	5	13159897	0	0	-3.38354e-16
chr21	14188140	14188220	14188216	blind	3	13159898	0	0	-3.38354e-16
chr21	14188217	14188347	14188221	blind	5	13159899	0	0	-3.38354e-16
chr21	14189923	14189962	14189927	non_blind	5	13159905	0	0	-3.38354e-16
chr21	14190766	14190947	14190943	non_blind	3	13159906	0	0	-3.38354e-16
chr21	14190944	14191107	14190948	non_blind	5	13159907	0	0	-3.38354e-16
chr21	14194353	14194591	14194587	non_blind	3	13159916	0	0	-3.38354e-16
chr21	14194588	14194741	14194737	blind	3	13159918	0	0	-3.38354e-16
chr21	14194761	14195248	14195244	non_blind	3	13159920	0	0	-3.38354e-16
chr21	14195245	14195269	14195249	blind	5	13159921	0	0	-3.38354e-16
chr21	14195245	14195269	14195265	blind	3	13159922	0	0	-3.38354e-16
chr21	14195279	14195406	14195402	non_blind	3	13159924	0	0	-3.38354e-16
chr21	14195403	14195625	14195407	non_blind	5	13159925	0	0	-3.38354e-16
chr21	14198141	14198241	14198145	non_blind	5	13159933	0	0	-3.38354e-16
chr21	14198633	14198744	14198637	blind	5	13159935	0	0	-3.38354e-16
chr21	14199150	14199293	14199289	blind	3	13159940	0	0	-3.38354e-16
chr21	14200897	14200982	14200901	blind	5	13159947	0	0	-3.38354e-16
chr21	14200897	14200982	14200978	blind	3	13159948	0	0	-3.38354e-16
chr21	14203920	14204007	14203924	non_blind	5	13159967	0	0	-3.38354e-16
chr21	14204780	14204837	14204833	non_blind	3	13159968	0	0	-3.38354e-16
chr21	14204834	14205276	14204838	non_blind	5	13159969	0	0	-3.38354e-16
chr21	14205525	14205868	14205864	non_blind	3	13159970	0	0	-3.38354e-16
chr21	14205865	14206071	14205869	non_blind	5	13159971	0	0	-3.38354e-16
chr21	14206733	14206820	14206816	non_blind	3	13159972	0	0	-3.38354e-16
chr21	14206817	14206875	14206821	non_blind	5	13159973	0	0	-3.38354e-16
chr21	14206965	14207372	14207368	non_blind	3	13159974	0	0	-3.38354e-16
chr21	14207369	14207580	14207576	blind	3	13159976	0	0	-3.38354e-16
chr21	14207577	14207729	14207581	non_blind	5	13159977	0	0	-3.38354e-16
chr21	14208009	14208098	14208013	blind	5	13159979	0	0	-3.38354e-16
chr21	14208009	14208098	14208094	blind	3	13159980	0	0	-3.38354e-16
chr21	14208095	14208171	14208099	non_blind	5	13159981	0	0	-3.38354e-16
chr21	14208999	14209223	14209219	non_blind	3	13159984	0	0	-3.38354e-16
chr21	14209220	14209335	14209224	non_blind	5	13159985	0	0	-3.38354e-16
chr21	14209508	14209534	14209530	non_blind	3	13159986	0	0	-3.38354e-16
chr21	14209531	14210621	14209535	non_blind	5	13159987	0	0	-3.38354e-16
chr21	14210618	14210805	14210801	non_blind	3	13159988	0	0	-3.38354e-16
chr21	14210802	14210930	14210806	blind	5	13159989	0	0	-3.38354e-16
chr21	14210802	14210930	14210926	blind	3	13159990	0	0	-3.38354e-16
chr21	14210927	14211492	14210931	non_blind	5	13159991	0	0	-3.38354e-16
chr21	14211489	14211797	14211793	non_blind	3	13159992	0	0	-3.38354e-16
chr21	14211794	14211814	14211798	non_blind	5	13159993	0	0	-3.38354e-16
chr21	14212705	14212847	14212843	non_blind	3	13159994	0	0	-3.38354e-16
chr21	14212844	14212944	14212848	non_blind	5	13159995	0	0	-3.38354e-16
chr21	14214284	14214317	14214313	non_blind	3	13159998	0	0	-3.38354e-16
chr21	14214314	14214552	14214318	non_blind	5	13159999	0	0	-3.38354e-16
chr21	14214549	14214719	14214715	non_blind	3	13160000	0	0	-3.38354e-16
chr21	14214716	14215094	14214720	blind	5	13160001	0	0	-3.38354e-16
chr21	14214716	14215094	14215090	blind	3	13160002	0	0	-3.38354e-16
chr21	14215091	14215179	14215095	non_blind	5	13160003	0	0	-3.38354e-16
chr21	14215176	14215243	14215239	non_blind	3	13160004	0	0	-3.38354e-16
chr21	14215240	14215261	14215244	non_blind	5	13160005	0	0	-3.38354e-16
chr21	14215266	14215499	14215270	blind	5	13160007	0	0	-3.38354e-16
chr21	14215266	14215499	14215495	blind	3	13160008	0	0	-3.38354e-16
chr21	14215496	14215709	14215500	non_blind	5	13160009	0	0	-3.38354e-16
chr21	14216731	14216847	14216843	non_blind	3	13160010	0	0	-3.38354e-16
chr21	14216844	14216975	14216848	blind	5	13160011	0	0	-3.38354e-16
chr21	14216844	14216975	14216971	blind	3	13160012	0	0	-3.38354e-16
chr21	14216972	14217890	14216976	blind	5	13160013	0	0	-3.38354e-16
chr21	14216972	14217890	14217886	blind	3	13160014	0	0	-3.38354e-16
chr21	14217887	14217909	14217891	blind	5	13160015	0	0	-3.38354e-16
chr21	14217887	14217909	14217905	blind	3	13160016	0	0	-3.38354e-16
chr21	14217906	14217990	14217910	blind	5	13160017	0	0	-3.38354e-16
chr21	14217906	14217990	14217986	blind	3	13160018	0	0	-3.38354e-16
chr21	14217987	14218172	14217991	non_blind	5	13160019	0	0	-3.38354e-16
chr21	14218507	14218641	14218637	non_blind	3	13160020	0	0	-3.38354e-16
chr21	14218638	14218783	14218642	non_blind	5	13160021	0	0	-3.38354e-16
chr21	14220165	14220302	14220298	non_blind	3	13160022	0	0	-3.38354e-16
chr21	14221461	14221724	14221465	non_blind	5	13160025	0	0	-3.38354e-16
chr21	14222125	14222228	14222224	non_blind	3	13160026	0	0	-3.38354e-16
chr21	14222225	14222287	14222229	blind	5	13160027	0	0	-3.38354e-16
chr21	14222225	14222287	14222283	blind	3	13160028	0	0	-3.38354e-16
chr21	14222284	14222660	14222288	non_blind	5	13160029	0	0	-3.38354e-16
chr21	14223537	14223601	14223597	non_blind	3	13160030	0	0	-3.38354e-16
chr21	14223760	14223837	14223833	non_blind	3	13160032	0	0	-3.38354e-16
chr21	14223898	14223964	14223960	non_blind	3	13160034	0	0	-3.38354e-16
chr21	14223961	14223991	14223965	non_blind	5	13160035	0	0	0.341508
chr21	14224312	14224464	14224460	non_blind	3	13160036	0	0	0.341508
chr21	14226045	14226097	14226093	non_blind	3	13160040	0	0	0.341508
chr21	14227108	14227327	14227323	blind	3	13160048	0	0	0.341508
chr21	14227324	14227382	14227328	non_blind	5	13160049	0	0	0.341508
chr21	14227896	14228052	14227900	non_blind	5	13160051	0	0	0.341508
chr21	14228743	14229077	14229073	non_blind	3	13160056	0	0	0.341508
chr21	14229210	14229232	14229228	non_blind	3	13160058	0	0	0.341508
chr21	14230980	14231028	14231024	non_blind	3	13160068	0	0	0.341508
chr21	14231025	14231199	14231029	non_blind	5	13160069	0	0	0.341508
chr21	14232325	14232494	14232490	non_blind	3	13160070	8	7.17167	0.341508
chr21	14232491	14232918	14232495	non_blind	5	13160071	0	0	0.341508
chr21	14232921	14233136	14233132	non_blind	3	13160072	0	0	0.469573
chr21	14233133	14233256	14233137	blind	5	13160073	0	0	0.469573
chr21	14233133	14233256	14233252	blind	3	13160074	0	0	0.469573
chr21	14233253	14233492	14233257	non_blind	5	13160075	0	0	0.469573
chr21	14234059	14234451	14234447	non_blind	3	13160076	0	0	0.469573
chr21	14234448	14234678	14234452	non_blind	5	13160077	0	0	0.469573
chr21	14234675	14235057	14235053	non_blind	3	13160078	0	0	0.469573
chr21	14235398	14235439	14235402	non_blind	5	13160085	0	0	0.469573
chr21	14235436	14235569	14235565	non_blind	3	13160086	0	0	0.469573
chr21	14235566	14235742	14235570	non_blind	5	13160087	0	0	0.128065
chr21	14235739	14236050	14236046	non_blind	3	13160088	3	2.68937	0.128065
chr21	14237233	14237257	14237253	non_blind	3	13160090	0	0	0.128065
chr21	14237254	14237277	14237258	blind	5	13160091	0	0	0.128065
chr21	14237254	14237277	14237273	blind	3	13160092	0	0	0.128065
chr21	14237274	14237430	14237278	blind	5	13160093	0	0	0.128065
chr21	14237274	14237430	14237426	blind	3	13160094	0	0	0.128065
chr21	14237427	14237449	14237431	non_blind	5	13160095	0	0	0.128065
chr21	14237446	14237501	14237497	non_blind	3	13160096	0	0	0.128065
chr21	14237498	14237623	14237502	blind	5	13160097	0	0	0.128065
chr21	14237498	14237623	14237619	blind	3	13160098	0	0	0.128065
chr21	14237620	14238077	14237624	blind	5	13160099	0	0	0.128065
chr21	14237620	14238077	14238073	blind	3	13160100	0	0	-3.38354e-16
chr21	14238074	14238267	14238078	blind	5	13160101	0	0	-3.38354e-16
chr21	14238074	14238267	14238263	blind	3	13160102	0	0	-3.38354e-16
chr21	14238264	14238949	14238268	non_blind	5	13160103	0	0	-3.38354e-16
chr21	14239026	14239059	14239055	non_blind	3	13160104	0	0	-3.38354e-16
chr21	14239056	14239122	14239060	non_blind	5	13160105	0	0	-3.38354e-16
chr21	14239297	14239424	14239420	non_blind	3	13160106	0	0	-3.38354e-16
chr21	14239421	14239439	14239425	blind	5	13160107	0	0	-3.38354e-16
chr21	14239421	14239439	14239435	blind	3	13160108	0	0	-3.38354e-16
chr21	14239436	14239750	14239440	non_blind	5	13160109	0	0	-3.38354e-16
chr21	14240045	14240501	14240497	non_blind	3	13160110	0	0	-3.38354e-16
chr21	14240498	14240992	14240502	non_blind	5	13160111	0	0	-3.38354e-16
chr21	14241384	14241450	14241446	non_blind	3	13160112	0	0	-3.38354e-16
chr21	14241447	14241518	14241451	blind	5	13160113	0	0	-3.38354e-16
chr21	14242390	14242531	14242527	blind	3	13160120	0	0	-3.38354e-16
chr21	14243018	14243074	14243070	non_blind	3	13160124	0	0	-3.38354e-16
chr21	14243071	14243111	14243075	non_blind	5	13160125	0	0	-3.38354e-16
chr21	14243165	14243222	14243218	non_blind	3	13160126	0	0	-3.38354e-16
chr21	14243219	14243285	14243281	blind	3	13160128	0	0	-3.38354e-16
chr21	14243282	14243378	14243286	non_blind	5	13160129	0	0	-3.38354e-16
chr21	14243375	14244020	14244016	non_blind	3	13160130	0	0	-3.38354e-16
chr21	14244085	14244390	14244386	non_blind	3	13160132	0	0	-3.38354e-16
chr21	14244387	14244466	14244391	non_blind	5	13160133	0	0	-3.38354e-16
chr21	14244782	14244866	14244862	non_blind	3	13160134	0	0	-3.38354e-16
chr21	14244863	14244901	14244867	non_blind	5	13160135	0	0	-3.38354e-16
chr21	14246117	14246255	14246251	non_blind	3	13160136	0	0	-3.38354e-16
chr21	14246252	14246622	14246256	blind	5	13160137	0	0	-3.38354e-16
chr21	14246252	14246622	14246618	blind	3	13160138	0	0	-3.38354e-16
chr21	14246700	14246794	14246790	non_blind	3	13160140	0	0	-3.38354e-16
chr21	14246791	14246812	14246795	blind	5	13160141	0	0	-3.38354e-16
chr21	14246791	14246812	14246808	blind	3	13160142	0	0	-3.38354e-16
chr21	14246809	14247027	14246813	blind	5	13160143	0	0	-3.38354e-16
chr21	14246809	14247027	14247023	blind	3	13160144	0	0	-3.38354e-16
chr21	14247027	14247279	14247275	non_blind	3	13160146	0	0	-3.38354e-16
chr21	14247276	14247746	14247280	non_blind	5	13160147	0	0	-3.38354e-16
chr21	14247771	14247836	14247832	non_blind	3	13160148	0	0	-3.38354e-16
chr21	14247833	14247907	14247837	non_blind	5	13160149	0	0	-3.38354e-16
chr21	14248642	14248670	14248646	non_blind	5	13160153	0	0	-3.38354e-16
chr21	14248857	14248886	14248882	non_blind	3	13160154	0	0	-3.38354e-16
chr21	14248883	14249050	14248887	non_blind	5	13160155	0	0	-3.38354e-16
chr21	14249937	14249966	14249941	blind	5	13160157	0	0	-3.38354e-16
chr21	14249937	14249966	14249962	blind	3	13160158	0	0	-3.38354e-16
chr21	14250526	14250609	14250605	non_blind	3	13160164	0	0	-3.38354e-16
chr21	14250606	14250684	14250610	non_blind	5	13160165	0	0	-3.38354e-16
chr21	14251300	14251352	14251348	non_blind	3	13160166	0	0	-3.38354e-16
chr21	14251349	14251492	14251353	non_blind	5	13160167	0	0	-3.38354e-16
chr21	14252101	14252572	14252568	non_blind	3	13160168	0	0	-3.38354e-16
chr21	14252569	14252608	14252573	non_blind	5	13160169	0	0	-3.38354e-16
chr21	14252821	14253315	14253311	non_blind	3	13160170	0	0	-3.38354e-16
chr21	14253312	14253923	14253316	non_blind	5	13160171	0	0	-3.38354e-16
chr21	14254296	14254328	14254324	non_blind	3	13160172	0	0	-3.38354e-16
chr21	14254325	14254523	14254329	non_blind	5	13160173	0	0	-3.38354e-16
chr21	14254520	14254775	14254771	non_blind	3	13160174	0	0	-3.38354e-16
chr21	14254772	14254799	14254776	blind	5	13160175	0	0	-3.38354e-16
chr21	14254772	14254799	14254795	blind	3	13160176	0	0	-3.38354e-16
chr21	14254796	14254838	14254800	blind	5	13160177	0	0	-3.38354e-16
chr21	14254796	14254838	14254834	blind	3	13160178	0	0	-3.38354e-16
chr21	14254835	14254883	14254839	blind	5	13160179	0	0	-3.38354e-16
chr21	14254835	14254883	14254879	blind	3	13160180	0	0	-3.38354e-16
chr21	14254880	14255168	14254884	non_blind	5	13160181	0	0	-3.38354e-16
chr21	14255448	14255484	14255452	non_blind	5	13160183	0	0	-3.38354e-16
chr21	14256951	14257180	14257176	non_blind	3	13160192	0	0	-3.38354e-16
chr21	14257177	14257378	14257181	blind	5	13160193	0	0	-3.38354e-16
chr21	14257177	14257378	14257374	blind	3	13160194	0	0	-3.38354e-16
chr21	14257375	14257539	14257379	blind	5	13160195	0	0	-3.38354e-16
chr21	14257375	14257539	14257535	blind	3	13160196	0	0	-3.38354e-16
chr21	14257536	14257852	14257540	non_blind	5	13160197	0	0	-3.38354e-16
chr21	14258170	14258404	14258400	blind	3	13160200	0	0	-3.38354e-16
chr21	14258401	14258703	14258405	non_blind	5	13160201	0	0	-3.38354e-16
chr21	14258700	14258735	14258731	non_blind	3	13160202	0	0	-3.38354e-16
chr21	14258950	14259624	14259620	non_blind	3	13160206	0	0	-3.38354e-16
chr21	14259621	14259723	14259625	non_blind	5	13160207	0	0	-3.38354e-16
chr21	14260186	14260340	14260336	non_blind	3	13160208	0	0	-3.38354e-16
chr21	14260337	14260554	14260341	blind	5	13160209	0	0	-3.38354e-16
chr21	14260337	14260554	14260550	blind	3	13160210	0	0	-3.38354e-16
chr21	14260551	14260657	14260555	non_blind	5	13160211	0	0	-3.38354e-16
chr21	14262739	14262773	14262769	non_blind	3	13160212	0	0	-3.38354e-16
chr21	14262770	14262858	14262774	non_blind	5	13160213	0	0	-3.38354e-16
chr21	14262964	14263318	14263314	non_blind	3	13160214	0	0	-3.38354e-16
chr21	14263315	14263428	14263319	non_blind	5	13160215	0	0	-3.38354e-16
chr21	14263425	14263567	14263563	non_blind	3	13160216	0	0	-3.38354e-16
chr21	14263564	14263694	14263568	blind	5	13160217	0	0	-3.38354e-16
chr21	14263564	14263694	14263690	blind	3	13160218	0	0	-3.38354e-16
chr21	14263691	14263895	14263695	non_blind	5	13160219	0	0	-3.38354e-16
chr21	14265064	14265216	14265212	non_blind	3	13160220	0	0	-3.38354e-16
chr21	14265213	14265269	14265217	non_blind	5	13160221	0	0	-3.38354e-16
chr21	14265712	14265782	14265778	non_blind	3	13160224	0	0	-3.38354e-16
chr21	14265779	14265876	14265783	non_blind	5	13160225	0	0	-3.38354e-16
chr21	14266177	14266346	14266342	non_blind	3	13160226	0	0	-3.38354e-16
chr21	14266343	14266500	14266347	blind	5	13160227	0	0	-3.38354e-16
chr21	14266343	14266500	14266496	blind	3	13160228	0	0	-3.38354e-16
chr21	14266497	14266612	14266501	non_blind	5	13160229	0	0	-3.38354e-16
chr21	14266609	14266850	14266846	non_blind	3	13160230	0	0	0.0426885
chr21	14266847	14266927	14266851	non_blind	5	13160231	0	0	0.0426885
chr21	14267093	14267419	14267415	non_blind	3	13160232	0	0	0.085377
chr21	14267416	14267465	14267420	non_blind	5	13160233	0	0	0.085377
chr21	14267572	14267831	14267827	non_blind	3	13160234	0	0	0.085377
chr21	14267828	14268003	14267832	non_blind	5	13160235	0	0	0.085377
chr21	14268917	14268996	14268921	blind	5	13160237	0	0	0.085377
chr21	14269030	14269332	14269328	non_blind	3	13160242	0	0	0.085377
chr21	14269329	14269385	14269333	non_blind	5	13160243	0	0	0.085377
chr21	14269680	14269766	14269762	non_blind	3	13160244	0	0	0.085377
chr21	14269763	14269837	14269767	non_blind	5	13160245	1	0.896458	0.085377
chr21	14269834	14269880	14269876	non_blind	3	13160246	0	0	0.085377
chr21	14270195	14270299	14270199	non_blind	5	13160251	1	0.896458	0.085377
chr21	14270737	14270758	14270754	non_blind	3	13160252	0	0	0.085377
chr21	14270755	14270929	14270759	non_blind	5	13160253	0	0	0.085377
chr21	14271021	14271180	14271176	non_blind	3	13160254	0	0	0.085377
chr21	14271177	14271297	14271181	non_blind	5	13160255	0	0	0.085377
chr21	14271963	14272075	14272071	non_blind	3	13160256	0	0	0.085377
chr21	14272072	14272179	14272076	non_blind	5	13160257	0	0	0.085377
chr21	14274091	14274343	14274339	non_blind	3	13160258	0	0	0.085377
chr21	14274347	14274523	14274351	blind	5	13160261	0	0	0.085377
chr21	14274347	14274523	14274519	blind	3	13160262	0	0	0.0426885
chr21	14274520	14274648	14274524	non_blind	5	13160263	0	0	0.0426885
chr21	14274773	14274901	14274897	non_blind	3	13160264	0	0	-3.38354e-16
chr21	14274898	14275030	14274902	non_blind	5	13160265	0	0	-3.38354e-16
chr21	14275027	14275112	14275108	non_blind	3	13160266	0	0	-3.38354e-16
chr21	14275109	14275254	14275113	blind	5	13160267	0	0	-3.38354e-16
chr21	14275109	14275254	14275250	blind	3	13160268	0	0	-3.38354e-16
chr21	14275251	14275403	14275255	non_blind	5	13160269	0	0	-3.38354e-16
chr21	14275491	14275625	14275621	non_blind	3	13160270	0	0	-3.38354e-16
chr21	14275622	14275696	14275626	non_blind	5	13160271	0	0	-3.38354e-16
chr21	14276170	14276235	14276231	non_blind	3	13160272	0	0	-3.38354e-16
chr21	14276232	14276262	14276236	blind	5	13160273	0	0	-3.38354e-16
chr21	14276232	14276262	14276258	blind	3	13160274	0	0	-3.38354e-16
chr21	14276259	14276436	14276263	non_blind	5	13160275	0	0	-3.38354e-16
chr21	14276433	14276484	14276480	non_blind	3	13160276	0	0	-3.38354e-16
chr21	14276904	14276980	14276976	non_blind	3	13160278	0	0	-3.38354e-16
chr21	14276977	14277162	14276981	non_blind	5	13160279	0	0	-3.38354e-16
chr21	14277314	14277374	14277370	non_blind	3	13160280	0	0	-3.38354e-16
chr21	14277988	14278030	14277992	non_blind	5	13160283	0	0	-3.38354e-16
chr21	14278027	14278260	14278256	non_blind	3	13160284	0	0	-3.38354e-16
chr21	14278257	14278742	14278261	blind	5	13160285	0	0	-3.38354e-16
chr21	14278257	14278742	14278738	blind	3	13160286	0	0	-3.38354e-16
chr21	14278739	14279362	14278743	non_blind	5	13160287	0	0	-3.38354e-16
chr21	14279506	14279705	14279701	non_blind	3	13160288	0	0	-3.38354e-16
chr21	14279702	14279999	14279706	non_blind	5	13160289	0	0	-3.38354e-16
chr21	14281890	14281930	14281894	non_blind	5	13160295	0	0	-3.38354e-16
chr21	14282324	14282895	14282328	blind	5	13160297	0	0	-3.38354e-16
chr21	14283343	14283609	14283347	blind	5	13160301	0	0	-3.38354e-16
chr21	14283343	14283609	14283605	blind	3	13160302	0	0	-3.38354e-16
chr21	14283618	14283680	14283622	non_blind	5	13160305	0	0	-3.38354e-16
chr21	14284136	14284314	14284140	non_blind	5	13160311	0	0	-3.38354e-16
chr21	14285202	14285290	14285206	non_blind	5	13160315	0	0	-3.38354e-16
chr21	14286534	14286681	14286677	non_blind	3	13160316	0	0	-3.38354e-16
chr21	14286678	14286725	14286682	non_blind	5	13160317	0	0	-3.38354e-16
chr21	14286722	14286761	14286757	non_blind	3	13160318	0	0	-3.38354e-16
chr21	14286758	14287593	14286762	blind	5	13160319	0	0	-3.38354e-16
chr21	14286758	14287593	14287589	blind	3	13160320	0	0	-3.38354e-16
chr21	14287590	14287927	14287594	non_blind	5	13160321	0	0	-3.38354e-16
chr21	14288674	14289103	14289099	non_blind	3	13160322	0	0	-3.38354e-16
chr21	14289504	14289703	14289699	non_blind	3	13160324	0	0	-3.38354e-16
chr21	14289700	14289861	14289704	non_blind	5	13160325	0	0	-3.38354e-16
chr21	14289858	14289892	14289888	non_blind	3	13160326	0	0	-3.38354e-16
chr21	14289889	14289946	14289893	non_blind	5	13160327	0	0	-3.38354e-16
chr21	14290270	14290466	14290462	non_blind	3	13160328	0	0	-3.38354e-16
chr21	14290463	14290750	14290467	blind	5	13160329	0	0	-3.38354e-16
chr21	14290463	14290750	14290746	blind	3	13160330	0	0	-3.38354e-16
chr21	14290747	14290824	14290751	non_blind	5	13160331	0	0	-3.38354e-16
chr21	14290892	14291040	14291036	non_blind	3	13160332	0	0	-3.38354e-16
chr21	14291119	14291179	14291175	non_blind	3	13160334	0	0	-3.38354e-16
chr21	14291176	14291204	14291180	non_blind	5	13160335	0	0	-3.38354e-16
chr21	14291693	14291738	14291734	non_blind	3	13160336	0	0	-3.38354e-16
chr21	14291735	14291934	14291739	non_blind	5	13160337	0	0	-3.38354e-16
chr21	14292069	14292253	14292249	non_blind	3	13160338	0	0	-3.38354e-16
chr21	14292250	14292317	14292254	non_blind	5	13160339	0	0	-3.38354e-16
chr21	14292615	14292648	14292644	non_blind	3	13160340	0	0	-3.38354e-16
chr21	14292645	14292809	14292649	blind	5	13160341	0	0	-3.38354e-16
chr21	14292645	14292809	14292805	blind	3	13160342	0	0	-3.38354e-16
chr21	14292806	14292831	14292810	non_blind	5	13160343	0	0	-3.38354e-16
chr21	14292828	14292848	14292844	non_blind	3	13160344	0	0	-3.38354e-16
chr21	14292845	14293081	14292849	non_blind	5	13160345	0	0	-3.38354e-16
chr21	14293146	14293189	14293185	non_blind	3	13160346	0	0	-3.38354e-16
chr21	14293186	14293404	14293190	non_blind	5	13160347	0	0	-3.38354e-16
chr21	14293401	14293638	14293634	non_blind	3	13160348	0	0	-3.38354e-16
chr21	14293635	14293705	14293701	blind	3	13160350	0	0	-3.38354e-16
chr21	14293702	14293723	14293706	blind	5	13160351	0	0	-3.38354e-16
chr21	14293702	14293723	14293719	blind	3	13160352	0	0	-3.38354e-16
chr21	14293720	14293758	14293724	non_blind	5	13160353	0	0	-3.38354e-16
chr21	14294059	14294250	14294246	non_blind	3	13160354	0	0	-3.38354e-16
chr21	14294247	14294333	14294251	non_blind	5	13160355	0	0	-3.38354e-16
chr21	14294958	14295000	14294996	non_blind	3	13160362	0	0	-3.38354e-16
chr21	14294997	14295049	14295001	non_blind	5	13160363	0	0	-3.38354e-16
chr21	14295077	14295131	14295127	non_blind	3	13160364	0	0	0.426885
chr21	14295189	14295239	14295193	non_blind	5	13160367	0	0	1.8356
chr21	14295330	14295349	14295345	non_blind	3	13160368	0	0	1.8356
chr21	14295550	14296166	14296162	non_blind	3	13160370	0	0	1.8356
chr21	14296163	14296254	14296167	non_blind	5	13160371	0	0	1.8356
chr21	14296302	14296554	14296550	non_blind	3	13160372	0	0	1.8356
chr21	14296551	14296653	14296555	non_blind	5	13160373	0	0	1.8356
chr21	14297674	14297754	14297750	non_blind	3	13160376	0	0	1.8356
chr21	14297751	14297895	14297755	non_blind	5	13160377	0	0	1.8356
chr21	14299913	14300040	14300036	non_blind	3	13160382	0	0	1.8356
chr21	14300037	14300143	14300041	non_blind	5	13160383	10	8.96458	1.8356
chr21	14300291	14300456	14300452	non_blind	3	13160384	33	29.5831	1.8356
chr21	14300453	14300482	14300457	non_blind	5	13160385	0	0	1.8356
chr21	14300530	14300567	14300563	non_blind	3	13160386	0	0	1.8356
chr21	14300564	14300600	14300568	non_blind	5	13160387	0	0	1.8356
chr21	14302129	14302168	14302164	non_blind	3	13160388	0	0	1.8356
chr21	14302165	14302526	14302169	blind	5	13160389	0	0	2.04905
chr21	14302165	14302526	14302522	blind	3	13160390	0	0	2.04905
chr21	14302523	14302737	14302527	non_blind	5	13160391	0	0	2.04905
chr21	14303510	14303684	14303680	blind	3	13160398	0	0	2.04905
chr21	14303681	14304199	14303685	blind	5	13160399	0	0	2.04905
chr21	14303681	14304199	14304195	blind	3	13160400	0	0	1.62216
chr21	14304196	14304225	14304200	blind	5	13160401	0	0	0.213442
chr21	14304196	14304225	14304221	blind	3	13160402	0	0	0.213442
chr21	14304222	14304242	14304226	non_blind	5	13160403	0	0	0.213442
chr21	14304239	14304283	14304279	non_blind	3	13160404	0	0	0.213442
chr21	14304280	14304333	14304284	non_blind	5	13160405	5	4.48229	0.213442
chr21	14305529	14305827	14305823	non_blind	3	13160406	0	0	0.213442
chr21	14305824	14306028	14305828	non_blind	5	13160407	0	0	0.213442
chr21	14306025	14306221	14306217	non_blind	3	13160408	0	0	0.213442
chr21	14306218	14306441	14306222	blind	5	13160409	0	0	0.213442
chr21	14306218	14306441	14306437	blind	3	13160410	0	0	0.213442
chr21	14306438	14306667	14306442	non_blind	5	13160411	0	0	0.213442
chr21	14306664	14307197	14307193	non_blind	3	13160412	0	0	0.213442
chr21	14307194	14307496	14307198	non_blind	5	13160413	0	0	0.213442
chr21	14307599	14307774	14307770	non_blind	3	13160414	0	0	0.213442
chr21	14307771	14307987	14307775	non_blind	5	13160415	0	0	0.213442
chr21	14307984	14308169	14308165	non_blind	3	13160416	0	0	-3.80648e-16
chr21	14308166	14308555	14308170	blind	5	13160417	0	0	-3.80648e-16
chr21	14308166	14308555	14308551	blind	3	13160418	0	0	-3.80648e-16
chr21	14309041	14309494	14309490	non_blind	3	13160420	0	0	-3.80648e-16
chr21	14309491	14309777	14309495	blind	5	13160421	0	0	-3.80648e-16
chr21	14309491	14309777	14309773	blind	3	13160422	0	0	-3.80648e-16
chr21	14309774	14309934	14309778	non_blind	5	13160423	0	0	-3.80648e-16
chr21	14310198	14310412	14310408	non_blind	3	13160424	0	0	-3.80648e-16
chr21	14310409	14310575	14310413	blind	5	13160425	0	0	-3.80648e-16
chr21	14310409	14310575	14310571	blind	3	13160426	0	0	-3.80648e-16
chr21	14310572	14311105	14310576	non_blind	5	13160427	0	0	-3.80648e-16
chr21	14311102	14311279	14311275	non_blind	3	13160428	0	0	-3.80648e-16
chr21	14311276	14311355	14311280	non_blind	5	13160429	0	0	-3.80648e-16
chr21	14311352	14311532	14311528	non_blind	3	13160430	0	0	-3.80648e-16
chr21	14311539	14311563	14311543	blind	5	13160433	0	0	-3.80648e-16
chr21	14311539	14311563	14311559	blind	3	13160434	0	0	-3.80648e-16
chr21	14311560	14311669	14311564	non_blind	5	13160435	0	0	-3.80648e-16
chr21	14311757	14311911	14311907	non_blind	3	13160436	0	0	-3.80648e-16
chr21	14311908	14311952	14311912	blind	5	13160437	0	0	-3.80648e-16
chr21	14311908	14311952	14311948	blind	3	13160438	0	0	-3.80648e-16
chr21	14311949	14312112	14311953	non_blind	5	13160439	0	0	-3.80648e-16
chr21	14312109	14312221	14312217	non_blind	3	13160440	0	0	-3.80648e-16
chr21	14312218	14312479	14312222	non_blind	5	13160441	0	0	-3.80648e-16
chr21	14312787	14312858	14312791	non_blind	5	13160443	0	0	-3.80648e-16
chr21	14313021	14313100	14313096	non_blind	3	13160444	0	0	-3.80648e-16
chr21	14313097	14313144	14313101	non_blind	5	13160445	0	0	-3.80648e-16
chr21	14313141	14313383	14313379	non_blind	3	13160446	0	0	-3.80648e-16
chr21	14313380	14313781	14313384	non_blind	5	13160447	0	0	-3.80648e-16
chr21	14314191	14314371	14314367	non_blind	3	13160448	0	0	-3.80648e-16
chr21	14314368	14314392	14314372	non_blind	5	13160449	0	0	-3.80648e-16
chr21	14315395	14315579	14315575	non_blind	3	13160450	0	0	-3.80648e-16
chr21	14315576	14315643	14315580	non_blind	5	13160451	0	0	-3.80648e-16
chr21	14316108	14316154	14316150	non_blind	3	13160452	0	0	-3.80648e-16
chr21	14316151	14316288	14316155	blind	5	13160453	0	0	-3.80648e-16
chr21	14316151	14316288	14316284	blind	3	13160454	0	0	-3.80648e-16
chr21	14316285	14316312	14316289	non_blind	5	13160455	0	0	-3.80648e-16
chr21	14317962	14318061	14318057	non_blind	3	13160456	0	0	-3.80648e-16
chr21	14318058	14318186	14318062	blind	5	13160457	0	0	-3.80648e-16
chr21	14318058	14318186	14318182	blind	3	13160458	0	0	-3.80648e-16
chr21	14318183	14318289	14318187	non_blind	5	13160459	0	0	-3.80648e-16
chr21	14318286	14318327	14318323	non_blind	3	13160460	0	0	-3.80648e-16
chr21	14318324	14318443	14318328	non_blind	5	13160461	0	0	-3.80648e-16
chr21	14318440	14318522	14318518	non_blind	3	13160462	0	0	-3.80648e-16
chr21	14318519	14318549	14318523	non_blind	5	13160463	0	0	-3.80648e-16
chr21	14319048	14319317	14319313	non_blind	3	13160464	0	0	-3.80648e-16
chr21	14319314	14319421	14319318	non_blind	5	13160465	0	0	-3.80648e-16
chr21	14319418	14319571	14319567	non_blind	3	13160466	0	0	-3.80648e-16
chr21	14319568	14319693	14319572	non_blind	5	13160467	0	0	-3.80648e-16
chr21	14320119	14320166	14320162	non_blind	3	13160468	0	0	-3.80648e-16
chr21	14320163	14320270	14320167	non_blind	5	13160469	0	0	-3.80648e-16
chr21	14320267	14320466	14320462	non_blind	3	13160470	0	0	-3.80648e-16
chr21	14320463	14320798	14320467	non_blind	5	13160471	0	0	-3.80648e-16
chr21	14321875	14322001	14321997	blind	3	13160478	0	0	-3.80648e-16
chr21	14322583	14322608	14322604	non_blind	3	13160480	0	0	-3.80648e-16
chr21	14322609	14323138	14322613	non_blind	5	13160483	0	0	-3.80648e-16
chr21	14323135	14323208	14323204	non_blind	3	13160484	0	0	-3.80648e-16
chr21	14323205	14323398	14323209	blind	5	13160485	0	0	-3.80648e-16
chr21	14323205	14323398	14323394	blind	3	13160486	0	0	-3.80648e-16
chr21	14323395	14323517	14323399	non_blind	5	13160487	0	0	0.298819
chr21	14323514	14323676	14323672	non_blind	3	13160488	0	0	0.298819
chr21	14323673	14323935	14323677	non_blind	5	13160489	0	0	0.298819
chr21	14324627	14324780	14324776	non_blind	3	13160494	0	0	0.298819
chr21	14324777	14324809	14324781	blind	5	13160495	0	0	0.298819
chr21	14324777	14324809	14324805	blind	3	13160496	0	0	0.298819
chr21	14324806	14324967	14324810	blind	5	13160497	0	0	0.298819
chr21	14324806	14324967	14324963	blind	3	13160498	0	0	0.298819
chr21	14324973	14325027	14324977	non_blind	5	13160501	0	0	0.298819
chr21	14325024	14325079	14325075	non_blind	3	13160502	0	0	0.298819
chr21	14325076	14325165	14325080	non_blind	5	13160503	7	6.27521	0.298819
chr21	14325215	14325344	14325340	non_blind	3	13160504	0	0	0.298819
chr21	14325341	14325601	14325345	non_blind	5	13160505	0	0	0.298819
chr21	14325598	14325657	14325653	non_blind	3	13160506	0	0	0.298819
chr21	14325654	14325737	14325658	non_blind	5	13160507	0	0	0.298819
chr21	14325734	14326143	14326139	non_blind	3	13160508	0	0	0.298819
chr21	14326140	14326441	14326144	blind	5	13160509	0	0	0.298819
chr21	14326140	14326441	14326437	blind	3	13160510	0	0	0.298819
chr21	14326438	14326622	14326442	non_blind	5	13160511	0	0	0.298819
chr21	14326619	14326672	14326668	non_blind	3	13160512	0	0	0.298819
chr21	14327406	14327780	14327776	blind	3	13160518	0	0	0.298819
chr21	14327777	14327848	14327781	non_blind	5	13160519	0	0	-3.80648e-16
chr21	14330312	14330497	14330493	blind	3	13160540	0	0	-3.80648e-16
chr21	14332222	14332547	14332543	non_blind	3	13160546	0	0	-3.80648e-16
chr21	14332544	14332893	14332548	non_blind	5	13160547	0	0	-3.80648e-16
chr21	14332890	14332944	14332940	non_blind	3	13160548	0	0	-3.80648e-16
chr21	14332980	14333250	14333246	non_blind	3	13160550	0	0	-3.80648e-16
chr21	14333261	14333297	14333265	non_blind	5	13160553	0	0	-3.80648e-16
chr21	14334089	14334202	14334198	non_blind	3	13160554	0	0	-3.80648e-16
chr21	14334329	14334436	14334432	non_blind	3	13160556	0	0	-3.80648e-16
chr21	14335113	14335258	14335117	non_blind	5	13160559	0	0	-3.80648e-16
chr21	14335259	14335911	14335263	blind	5	13160561	0	0	-3.80648e-16
chr21	14335259	14335911	14335907	blind	3	13160562	0	0	-3.80648e-16
chr21	14335908	14336076	14335912	non_blind	5	13160563	0	0	-3.80648e-16
chr21	14336341	14336453	14336449	non_blind	3	13160564	0	0	-3.80648e-16
chr21	14336450	14336573	14336454	blind	5	13160565	0	0	-3.80648e-16
chr21	14336450	14336573	14336569	blind	3	13160566	0	0	-3.80648e-16
chr21	14336570	14336637	14336574	non_blind	5	13160567	0	0	-3.80648e-16
chr21	14337139	14337193	14337189	non_blind	3	13160570	0	0	-3.80648e-16
chr21	14337190	14337228	14337194	blind	5	13160571	0	0	-3.80648e-16
chr21	14337190	14337228	14337224	blind	3	13160572	0	0	-3.80648e-16
chr21	14337225	14337587	14337229	blind	5	13160573	0	0	-3.80648e-16
chr21	14337225	14337587	14337583	blind	3	13160574	0	0	0.298819
chr21	14337584	14337728	14337588	non_blind	5	13160575	0	0	0.298819
chr21	14338428	14338587	14338432	blind	5	13160577	0	0	0.298819
chr21	14338428	14338587	14338583	blind	3	13160578	0	0	0.298819
chr21	14338584	14338769	14338588	blind	5	13160579	0	0	0.298819
chr21	14338584	14338769	14338765	blind	3	13160580	0	0	0.298819
chr21	14338766	14339001	14338770	blind	5	13160581	0	0	0.298819
chr21	14338766	14339001	14338997	blind	3	13160582	0	0	0.298819
chr21	14339211	14339591	14339587	non_blind	3	13160586	0	0	0.298819
chr21	14339614	14339715	14339711	non_blind	3	13160588	0	0	0.298819
chr21	14339712	14339771	14339716	non_blind	5	13160589	7	6.27521	0.298819
chr21	14340594	14340843	14340598	non_blind	5	13160591	0	0	0.298819
chr21	14341811	14341923	14341919	non_blind	3	13160592	0	0	0.298819
chr21	14341920	14342068	14341924	blind	5	13160593	0	0	0.298819
chr21	14341920	14342068	14342064	blind	3	13160594	0	0	0.298819
chr21	14342065	14342360	14342069	non_blind	5	13160595	0	0	0.298819
chr21	14344053	14344079	14344075	non_blind	3	13160602	0	0	0.298819
chr21	14344076	14344180	14344080	non_blind	5	13160603	0	0	0.298819
chr21	14344177	14344240	14344236	non_blind	3	13160604	0	0	0.298819
chr21	14344237	14344286	14344241	blind	5	13160605	0	0	0.298819
chr21	14344237	14344286	14344282	blind	3	13160606	0	0	0.298819
chr21	14344283	14344689	14344287	non_blind	5	13160607	0	0	-3.80648e-16
chr21	14344686	14344864	14344860	non_blind	3	13160608	0	0	-3.80648e-16
chr21	14344861	14344937	14344865	non_blind	5	13160609	0	0	-3.80648e-16
chr21	14344934	14345198	14345194	non_blind	3	13160610	0	0	-3.80648e-16
chr21	14345195	14345220	14345199	non_blind	5	13160611	0	0	-3.80648e-16
chr21	14345217	14345292	14345288	non_blind	3	13160612	0	0	-3.80648e-16
chr21	14345289	14345532	14345293	non_blind	5	13160613	0	0	-3.80648e-16
chr21	14346624	14346772	14346768	non_blind	3	13160616	0	0	0.298819
chr21	14346769	14346915	14346773	non_blind	5	13160617	0	0	0.298819
chr21	14347194	14347221	14347198	non_blind	5	13160619	0	0	0.384196
chr21	14347431	14347544	14347540	non_blind	3	13160620	0	0	0.384196
chr21	14347541	14347572	14347545	non_blind	5	13160621	0	0	0.384196
chr21	14347569	14347719	14347715	non_blind	3	13160622	0	0	0.384196
chr21	14347716	14347754	14347720	non_blind	5	13160623	0	0	0.384196
chr21	14347751	14347868	14347864	non_blind	3	13160624	0	0	0.384196
chr21	14348518	14348580	14348576	non_blind	3	13160626	0	0	0.384196
chr21	14348577	14348810	14348581	non_blind	5	13160627	0	0	0.384196
chr21	14349801	14349918	14349914	non_blind	3	13160628	7	6.27521	0.384196
chr21	14349915	14350158	14349919	non_blind	5	13160629	0	0	0.384196
chr21	14350155	14350240	14350236	non_blind	3	13160630	2	1.79292	0.384196
chr21	14350425	14350541	14350537	non_blind	3	13160632	0	0	0.384196
chr21	14350538	14350583	14350542	non_blind	5	13160633	0	0	0.384196
chr21	14350593	14350623	14350619	non_blind	3	13160634	0	0	0.384196
chr21	14350620	14350697	14350624	non_blind	5	13160635	0	0	0.384196
chr21	14351685	14351851	14351847	non_blind	3	13160640	0	0	0.384196
chr21	14351848	14351898	14351894	blind	3	13160642	0	0	0.384196
chr21	14352239	14352436	14352432	non_blind	3	13160644	0	0	0.384196
chr21	14352746	14352858	14352854	non_blind	3	13160646	0	0	0.384196
chr21	14352855	14353011	14352859	non_blind	5	13160647	0	0	0.085377
chr21	14353189	14353325	14353321	non_blind	3	13160648	0	0	0.085377
chr21	14353322	14353369	14353326	non_blind	5	13160649	0	0	-3.70074e-16
chr21	14355457	14356250	14355461	non_blind	5	13160657	0	0	-3.70074e-16
chr21	14356247	14356339	14356335	non_blind	3	13160658	0	0	-3.70074e-16
chr21	14356336	14356502	14356340	non_blind	5	13160659	0	0	-3.70074e-16
chr21	14356565	14356613	14356609	non_blind	3	13160660	0	0	-3.70074e-16
chr21	14356610	14356900	14356614	blind	5	13160661	0	0	-3.70074e-16
chr21	14356610	14356900	14356896	blind	3	13160662	0	0	-3.70074e-16
chr21	14356897	14356928	14356901	non_blind	5	13160663	0	0	-3.70074e-16
chr21	14356925	14356971	14356967	non_blind	3	13160664	0	0	-3.70074e-16
chr21	14356968	14357007	14356972	non_blind	5	13160665	0	0	-3.70074e-16
chr21	14357004	14357123	14357119	non_blind	3	13160666	0	0	0.0426885
chr21	14357120	14357297	14357124	non_blind	5	13160667	0	0	0.0426885
chr21	14357294	14357824	14357820	non_blind	3	13160668	0	0	0.0426885
chr21	14357821	14357863	14357825	non_blind	5	13160669	0	0	0.0426885
chr21	14358542	14358874	14358870	non_blind	3	13160670	0	0	0.0426885
chr21	14358871	14358900	14358875	blind	5	13160671	0	0	0.0426885
chr21	14358871	14358900	14358896	blind	3	13160672	0	0	0.0426885
chr21	14358897	14359061	14358901	blind	5	13160673	0	0	0.0426885
chr21	14358897	14359061	14359057	blind	3	13160674	0	0	0.0426885
chr21	14359058	14359277	14359062	non_blind	5	13160675	0	0	0.0426885
chr21	14359283	14359591	14359587	non_blind	3	13160676	1	0.896458	0.0426885
chr21	14359588	14359778	14359592	blind	5	13160677	0	0	0.0426885
chr21	14359588	14359778	14359774	blind	3	13160678	0	0	0.0426885
chr21	14360802	14360883	14360879	non_blind	3	13160682	0	0	0.0426885
chr21	14360880	14361123	14360884	non_blind	5	13160683	0	0	0.0426885
chr21	14361356	14361386	14361360	blind	5	13160685	0	0	0.0426885
chr21	14361356	14361386	14361382	blind	3	13160686	0	0	0.0426885
chr21	14361383	14361433	14361387	blind	5	13160687	0	0	0.0426885
chr21	14361383	14361433	14361429	blind	3	13160688	0	0	0.0426885
chr21	14361430	14361478	14361434	non_blind	5	13160689	0	0	0.0426885
chr21	14363181	14363395	14363391	blind	3	13160694	0	0	0.0426885
chr21	14363392	14363420	14363396	blind	5	13160695	0	0	-3.70074e-16
chr21	14363392	14363420	14363416	blind	3	13160696	0	0	-3.70074e-16
chr21	14363417	14363456	14363421	non_blind	5	13160697	0	0	-3.70074e-16
chr21	14364893	14365274	14365270	non_blind	3	13160700	0	0	-3.70074e-16
chr21	14365271	14365369	14365275	non_blind	5	13160701	0	0	-3.70074e-16
chr21	14365564	14365851	14365847	non_blind	3	13160702	0	0	-3.70074e-16
chr21	14365852	14366032	14366028	non_blind	3	13160704	0	0	-3.70074e-16
chr21	14366029	14366104	14366033	blind	5	13160705	0	0	-3.70074e-16
chr21	14366029	14366104	14366100	blind	3	13160706	0	0	-3.70074e-16
chr21	14366101	14366246	14366105	non_blind	5	13160707	0	0	-3.70074e-16
chr21	14366938	14367093	14367089	non_blind	3	13160714	0	0	-3.70074e-16
chr21	14367090	14367178	14367094	blind	5	13160715	0	0	-3.70074e-16
chr21	14367090	14367178	14367174	blind	3	13160716	0	0	-3.70074e-16
chr21	14367175	14367228	14367179	non_blind	5	13160717	0	0	-3.70074e-16
chr21	14367225	14367508	14367504	non_blind	3	13160718	0	0	-3.70074e-16
chr21	14367505	14367607	14367509	blind	5	13160719	0	0	-3.70074e-16
chr21	14367505	14367607	14367603	blind	3	13160720	0	0	-3.70074e-16
chr21	14367620	14367640	14367636	non_blind	3	13160722	0	0	-3.70074e-16
chr21	14367637	14367717	14367641	blind	5	13160723	0	0	-3.70074e-16
chr21	14367637	14367717	14367713	blind	3	13160724	0	0	-3.70074e-16
chr21	14367714	14367847	14367718	non_blind	5	13160725	0	0	-3.70074e-16
chr21	14368551	14368590	14368586	non_blind	3	13160726	0	0	-3.70074e-16
chr21	14368587	14368623	14368591	non_blind	5	13160727	0	0	-3.70074e-16
chr21	14370325	14370354	14370350	non_blind	3	13160732	0	0	-3.70074e-16
chr21	14370351	14370401	14370355	blind	5	13160733	0	0	-3.70074e-16
chr21	14370351	14370401	14370397	blind	3	13160734	0	0	-3.70074e-16
chr21	14370398	14370534	14370402	blind	5	13160735	0	0	-3.70074e-16
chr21	14370398	14370534	14370530	blind	3	13160736	0	0	-3.70074e-16
chr21	14370531	14370871	14370535	non_blind	5	13160737	0	0	-3.70074e-16
chr21	14371228	14371448	14371444	non_blind	3	13160738	0	0	-3.70074e-16
chr21	14371445	14371661	14371449	non_blind	5	13160739	0	0	-3.70074e-16
chr21	14371658	14371781	14371777	non_blind	3	13160740	0	0	-3.70074e-16
chr21	14371778	14371890	14371782	non_blind	5	13160741	0	0	-3.70074e-16
chr21	14371887	14372250	14372246	non_blind	3	13160742	0	0	-3.70074e-16
chr21	14372247	14372696	14372251	non_blind	5	13160743	0	0	-3.70074e-16
chr21	14373208	14373419	14373415	non_blind	3	13160744	0	0	-3.70074e-16
chr21	14373416	14373440	14373420	blind	5	13160745	0	0	-3.70074e-16
chr21	14373416	14373440	14373436	blind	3	13160746	0	0	-3.70074e-16
chr21	14373437	14373577	14373441	blind	5	13160747	0	0	-3.70074e-16
chr21	14373437	14373577	14373573	blind	3	13160748	0	0	-3.70074e-16
chr21	14373574	14373760	14373578	blind	5	13160749	0	0	-3.70074e-16
chr21	14373574	14373760	14373756	blind	3	13160750	0	0	-3.70074e-16
chr21	14373757	14373794	14373761	blind	5	13160751	0	0	-3.70074e-16
chr21	14373757	14373794	14373790	blind	3	13160752	0	0	-3.70074e-16
chr21	14373791	14374223	14373795	blind	5	13160753	0	0	-3.70074e-16
chr21	14373791	14374223	14374219	blind	3	13160754	0	0	-3.70074e-16
chr21	14374220	14374399	14374224	non_blind	5	13160755	0	0	-3.70074e-16
chr21	14374455	14375180	14375176	non_blind	3	13160756	0	0	-3.70074e-16
chr21	14375177	14375238	14375181	non_blind	5	13160757	0	0	-3.70074e-16
chr21	14375862	14375892	14375866	non_blind	5	13160763	0	0	-3.70074e-16
chr21	14375961	14376191	14376187	non_blind	3	13160764	0	0	-3.70074e-16
chr21	14376364	14376505	14376501	blind	3	13160770	0	0	-3.70074e-16
chr21	14376502	14376633	14376506	blind	5	13160771	0	0	-3.70074e-16
chr21	14376502	14376633	14376629	blind	3	13160772	0	0	-3.70074e-16
chr21	14376630	14376782	14376634	non_blind	5	13160773	0	0	-3.70074e-16
chr21	14376789	14376856	14376852	non_blind	3	13160774	0	0	-3.70074e-16
chr21	14376853	14377240	14376857	non_blind	5	13160775	0	0	-3.70074e-16
chr21	14377237	14377320	14377316	non_blind	3	13160776	0	0	-3.70074e-16
chr21	14377317	14377401	14377321	non_blind	5	13160777	0	0	-3.70074e-16
chr21	14377649	14378244	14378240	blind	3	13160780	0	0	-3.70074e-16
chr21	14378241	14378498	14378245	non_blind	5	13160781	0	0	-3.70074e-16
chr21	14379515	14379548	14379544	non_blind	3	13160786	0	0	-3.70074e-16
chr21	14379545	14379834	14379549	non_blind	5	13160787	0	0	-3.70074e-16
chr21	14380216	14380432	14380428	non_blind	3	13160790	0	0	-3.70074e-16
chr21	14380429	14380804	14380433	non_blind	5	13160791	0	0	-3.70074e-16
chr21	14380804	14380823	14380808	non_blind	5	13160793	0	0	-3.70074e-16
chr21	14380967	14381045	14381041	non_blind	3	13160794	0	0	-3.70074e-16
chr21	14381042	14381095	14381046	non_blind	5	13160795	0	0	-3.70074e-16
chr21	14381359	14381460	14381456	non_blind	3	13160796	0	0	-3.70074e-16
chr21	14381457	14381543	14381461	blind	5	13160797	0	0	-3.70074e-16
chr21	14381457	14381543	14381539	blind	3	13160798	0	0	-3.70074e-16
chr21	14381540	14381907	14381544	blind	5	13160799	0	0	-3.70074e-16
chr21	14381540	14381907	14381903	blind	3	13160800	0	0	-3.70074e-16
chr21	14381904	14382476	14381908	non_blind	5	13160801	0	0	-3.70074e-16
chr21	14382473	14382710	14382706	non_blind	3	13160802	0	0	-3.70074e-16
chr21	14382707	14383005	14382711	blind	5	13160803	0	0	-3.70074e-16
chr21	14382707	14383005	14383001	blind	3	13160804	0	0	-3.70074e-16
chr21	14383002	14383051	14383006	blind	5	13160805	0	0	-3.70074e-16
chr21	14383002	14383051	14383047	blind	3	13160806	0	0	-3.70074e-16
chr21	14383048	14383102	14383052	blind	5	13160807	0	0	-3.70074e-16
chr21	14383048	14383102	14383098	blind	3	13160808	0	0	-3.70074e-16
chr21	14383099	14383431	14383103	blind	5	13160809	0	0	-3.70074e-16
chr21	14383099	14383431	14383427	blind	3	13160810	0	0	-3.70074e-16
chr21	14383428	14383650	14383432	blind	5	13160811	0	0	-3.70074e-16
chr21	14383428	14383650	14383646	blind	3	13160812	0	0	-3.70074e-16
chr21	14383647	14383868	14383651	blind	5	13160813	0	0	-3.70074e-16
chr21	14383647	14383868	14383864	blind	3	13160814	0	0	-3.70074e-16
chr21	14383865	14384041	14383869	non_blind	5	13160815	0	0	-3.70074e-16
chr21	14384038	14384161	14384157	non_blind	3	13160816	0	0	-3.70074e-16
chr21	14384158	14384314	14384162	blind	5	13160817	0	0	-3.70074e-16
chr21	14384158	14384314	14384310	blind	3	13160818	0	0	-3.70074e-16
chr21	14384311	14384530	14384315	blind	5	13160819	0	0	-3.70074e-16
chr21	14384311	14384530	14384526	blind	3	13160820	0	0	-3.70074e-16
chr21	14384527	14384561	14384531	blind	5	13160821	0	0	-3.70074e-16
chr21	14384527	14384561	14384557	blind	3	13160822	0	0	-3.70074e-16
chr21	14384568	14384692	14384688	non_blind	3	13160824	0	0	-3.70074e-16
chr21	14384689	14384729	14384693	blind	5	13160825	0	0	-3.70074e-16
chr21	14384689	14384729	14384725	blind	3	13160826	0	0	-3.70074e-16
chr21	14384726	14385177	14384730	non_blind	5	13160827	0	0	-3.70074e-16
chr21	14386703	14386821	14386707	non_blind	5	13160829	0	0	-3.70074e-16
chr21	14387418	14387616	14387612	non_blind	3	13160830	0	0	-3.70074e-16
chr21	14387613	14387685	14387617	non_blind	5	13160831	0	0	-3.70074e-16
chr21	14387682	14387903	14387899	non_blind	3	13160832	0	0	-3.70074e-16
chr21	14387900	14387953	14387904	non_blind	5	13160833	0	0	-3.70074e-16
chr21	14387950	14387972	14387968	non_blind	3	13160834	0	0	-3.70074e-16
chr21	14387969	14387999	14387973	non_blind	5	13160835	0	0	-3.70074e-16
chr21	14388270	14388594	14388590	non_blind	3	13160836	0	0	-3.70074e-16
chr21	14388591	14388676	14388595	non_blind	5	13160837	0	0	-3.70074e-16
chr21	14389046	14389301	14389050	non_blind	5	13160839	0	0	-3.70074e-16
chr21	14390081	14390145	14390141	non_blind	3	13160840	0	0	-3.70074e-16
chr21	14390142	14390433	14390146	non_blind	5	13160841	0	0	-3.70074e-16
chr21	14390430	14390788	14390784	non_blind	3	13160842	0	0	-3.70074e-16
chr21	14390793	14390869	14390865	non_blind	3	13160844	0	0	-3.70074e-16
chr21	14390866	14391001	14390870	non_blind	5	13160845	0	0	-3.70074e-16
chr21	14391919	14391956	14391952	non_blind	3	13160850	0	0	-3.70074e-16
chr21	14391953	14392058	14391957	non_blind	5	13160851	0	0	-3.70074e-16
chr21	14392907	14393180	14393176	non_blind	3	13160852	0	0	-3.70074e-16
chr21	14393177	14393234	14393181	non_blind	5	13160853	0	0	-3.70074e-16
chr21	14393399	14393571	14393567	non_blind	3	13160854	0	0	-3.70074e-16
chr21	14393568	14393626	14393572	non_blind	5	13160855	0	0	-3.70074e-16
chr21	14393979	14394025	14394021	non_blind	3	13160856	0	0	-3.70074e-16
chr21	14394022	14394108	14394026	non_blind	5	13160857	0	0	-3.70074e-16
chr21	14394105	14394339	14394335	non_blind	3	13160858	0	0	-3.70074e-16
chr21	14394336	14394472	14394340	blind	5	13160859	0	0	-3.70074e-16
chr21	14394336	14394472	14394468	blind	3	13160860	0	0	-3.70074e-16
chr21	14394469	14394660	14394473	blind	5	13160861	0	0	-3.70074e-16
chr21	14394469	14394660	14394656	blind	3	13160862	0	0	-3.70074e-16
chr21	14394657	14395287	14394661	blind	5	13160863	0	0	-3.70074e-16
chr21	14394657	14395287	14395283	blind	3	13160864	0	0	-3.70074e-16
chr21	14395284	14395649	14395288	blind	5	13160865	0	0	-3.70074e-16
chr21	14395284	14395649	14395645	blind	3	13160866	0	0	-3.70074e-16
chr21	14395646	14395724	14395650	blind	5	13160867	0	0	-3.70074e-16
chr21	14395646	14395724	14395720	blind	3	13160868	0	0	0.213442
chr21	14395721	14395804	14395725	blind	5	13160869	0	0	0.213442
chr21	14395721	14395804	14395800	blind	3	13160870	0	0	0.213442
chr21	14395801	14395886	14395805	non_blind	5	13160871	0	0	0.213442
chr21	14397115	14397201	14397197	non_blind	3	13160872	0	0	0.213442
chr21	14397198	14397306	14397202	non_blind	5	13160873	0	0	0.213442
chr21	14397860	14397968	14397964	non_blind	3	13160874	0	0	0.213442
chr21	14397965	14398019	14397969	blind	5	13160875	0	0	0.213442
chr21	14397965	14398019	14398015	blind	3	13160876	0	0	0.213442
chr21	14398016	14398052	14398020	non_blind	5	13160877	0	0	0.213442
chr21	14398544	14398628	14398624	non_blind	3	13160878	5	4.48229	0.213442
chr21	14398625	14398797	14398629	non_blind	5	13160879	0	0	0.213442
chr21	14400036	14400057	14400053	non_blind	3	13160882	0	0	0.213442
chr21	14400054	14400132	14400058	non_blind	5	13160883	0	0	0.213442
chr21	14400129	14400213	14400209	non_blind	3	13160884	0	0	0.298819
chr21	14400210	14400274	14400214	blind	5	13160885	0	0	0.298819
chr21	14400210	14400274	14400270	blind	3	13160886	0	0	0.298819
chr21	14400271	14400298	14400275	non_blind	5	13160887	0	0	0.298819
chr21	14400295	14400490	14400486	non_blind	3	13160888	0	0	0.298819
chr21	14400487	14400618	14400491	non_blind	5	13160889	0	0	0.298819
chr21	14401164	14401273	14401269	non_blind	3	13160890	0	0	0.298819
chr21	14401270	14401327	14401274	non_blind	5	13160891	0	0	0.085377
chr21	14401324	14401429	14401425	non_blind	3	13160892	0	0	0.085377
chr21	14401473	14401549	14401545	non_blind	3	13160894	0	0	0.085377
chr21	14401546	14401792	14401550	blind	5	13160895	2	1.79292	0.085377
chr21	14401546	14401792	14401788	blind	3	13160896	0	0	0.085377
chr21	14401789	14401941	14401793	non_blind	5	13160897	0	0	0.085377
chr21	14401938	14402192	14402188	non_blind	3	13160898	0	0	0.085377
chr21	14402189	14402355	14402193	non_blind	5	13160899	0	0	0.085377
chr21	14402754	14403011	14403007	non_blind	3	13160900	0	0	0.085377
chr21	14403008	14403306	14403012	blind	5	13160901	0	0	0.085377
chr21	14404209	14404371	14404367	non_blind	3	13160908	0	0	0.085377
chr21	14404368	14404710	14404372	non_blind	5	13160909	0	0	0.085377
chr21	14404707	14405134	14405130	non_blind	3	13160910	0	0	0.085377
chr21	14405131	14405471	14405135	non_blind	5	13160911	0	0	0.085377
chr21	14405468	14405541	14405537	non_blind	3	13160912	0	0	-3.70074e-16
chr21	14405538	14405746	14405542	non_blind	5	13160913	0	0	-3.70074e-16
chr21	14405970	14406027	14406023	non_blind	3	13160914	0	0	-3.70074e-16
chr21	14406252	14406456	14406452	non_blind	3	13160920	0	0	-3.70074e-16
chr21	14406463	14406695	14406467	non_blind	5	13160923	0	0	-3.70074e-16
chr21	14409094	14409508	14409504	non_blind	3	13160932	0	0	-3.70074e-16
chr21	14409505	14409703	14409509	non_blind	5	13160933	0	0	-3.70074e-16
chr21	14411835	14411939	14411839	blind	5	13160939	0	0	-3.70074e-16
chr21	14411939	14412064	14412060	non_blind	3	13160942	0	0	-3.70074e-16
chr21	14412061	14412120	14412065	non_blind	5	13160943	0	0	-3.70074e-16
chr21	14412117	14412150	14412146	non_blind	3	13160944	0	0	-3.70074e-16
chr21	14412147	14412203	14412151	non_blind	5	13160945	0	0	-3.70074e-16
chr21	14412200	14412292	14412288	non_blind	3	13160946	0	0	-3.70074e-16
chr21	14412289	14412474	14412293	non_blind	5	13160947	0	0	-3.70074e-16
chr21	14412737	14412933	14412929	non_blind	3	13160950	0	0	-3.70074e-16
chr21	14412930	14413146	14412934	blind	5	13160951	0	0	-3.70074e-16
chr21	14412930	14413146	14413142	blind	3	13160952	0	0	-3.70074e-16
chr21	14413143	14413214	14413147	non_blind	5	13160953	0	0	-3.70074e-16
chr21	14413211	14413303	14413299	non_blind	3	13160954	0	0	-3.70074e-16
chr21	14413300	14413443	14413304	non_blind	5	13160955	0	0	-3.70074e-16
chr21	14414334	14414502	14414498	non_blind	3	13160958	0	0	-3.70074e-16
chr21	14414499	14414518	14414503	non_blind	5	13160959	0	0	-3.70074e-16
chr21	14414661	14414802	14414798	non_blind	3	13160960	0	0	-3.70074e-16
chr21	14414799	14414833	14414803	non_blind	5	13160961	0	0	-3.70074e-16
chr21	14414830	14414932	14414928	non_blind	3	13160962	0	0	-3.70074e-16
chr21	14414936	14415291	14414940	non_blind	5	13160965	0	0	-3.70074e-16
chr21	14415288	14415782	14415778	non_blind	3	13160966	0	0	-3.70074e-16
chr21	14415779	14416010	14415783	non_blind	5	13160967	0	0	-3.70074e-16
chr21	14416181	14416205	14416201	non_blind	3	13160968	0	0	-3.70074e-16
chr21	14416202	14416312	14416206	non_blind	5	13160969	0	0	-3.70074e-16
chr21	14417683	14417809	14417805	non_blind	3	13160970	0	0	-3.70074e-16
chr21	14417806	14418397	14417810	non_blind	5	13160971	0	0	-3.70074e-16
chr21	14419358	14419505	14419501	non_blind	3	13160972	0	0	-3.70074e-16
chr21	14420782	14420885	14420786	blind	5	13160975	0	0	-3.70074e-16
chr21	14420782	14420885	14420881	blind	3	13160976	0	0	-3.70074e-16
chr21	14420882	14420996	14420886	blind	5	13160977	0	0	-3.70074e-16
chr21	14420882	14420996	14420992	blind	3	13160978	0	0	-3.70074e-16
chr21	14420993	14421291	14420997	blind	5	13160979	0	0	-3.70074e-16
chr21	14420993	14421291	14421287	blind	3	13160980	0	0	-3.70074e-16
chr21	14422878	14422994	14422882	non_blind	5	13160987	0	0	-3.70074e-16
chr21	14422991	14423098	14423094	non_blind	3	13160988	0	0	-3.70074e-16
chr21	14423102	14423219	14423215	non_blind	3	13160990	0	0	-3.70074e-16
chr21	14423437	14423509	14423441	blind	5	13160997	0	0	-3.70074e-16
chr21	14423437	14423509	14423505	blind	3	13160998	0	0	-3.70074e-16
chr21	14424048	14424073	14424052	blind	5	13161003	0	0	-3.70074e-16
chr21	14424048	14424073	14424069	blind	3	13161004	0	0	-3.70074e-16
chr21	14424070	14424144	14424074	blind	5	13161005	0	0	-3.70074e-16
chr21	14424876	14425030	14424880	blind	5	13161013	0	0	-3.70074e-16
chr21	14427392	14427535	14427531	non_blind	3	13161016	0	0	-3.70074e-16
chr21	14427532	14427752	14427536	non_blind	5	13161017	0	0	-3.70074e-16
chr21	14428288	14428364	14428292	blind	5	13161019	0	0	-3.70074e-16
chr21	14428288	14428364	14428360	blind	3	13161020	0	0	-3.70074e-16
chr21	14428916	14428953	14428920	non_blind	5	13161025	0	0	-3.70074e-16
chr21	14430532	14430668	14430536	blind	5	13161031	0	0	-3.70074e-16
chr21	14430532	14430668	14430664	blind	3	13161032	0	0	-3.70074e-16
chr21	14430665	14430825	14430669	non_blind	5	13161033	0	0	-3.70074e-16
chr21	14431074	14431154	14431150	non_blind	3	13161034	0	0	-3.70074e-16
chr21	14431151	14432331	14431155	non_blind	5	13161035	0	0	-3.70074e-16
chr21	14432875	14433400	14433396	non_blind	3	13161036	0	0	-3.70074e-16
chr21	14433397	14433497	14433401	non_blind	5	13161037	0	0	-3.70074e-16
chr21	14433494	14433522	14433518	non_blind	3	13161038	0	0	-3.70074e-16
chr21	14433519	14433642	14433523	non_blind	5	13161039	0	0	-3.70074e-16
chr21	14434275	14434350	14434346	non_blind	3	13161040	0	0	-3.70074e-16
chr21	14434347	14434599	14434351	non_blind	5	13161041	0	0	-3.70074e-16
chr21	14435022	14435219	14435215	blind	3	13161044	0	0	-3.70074e-16
chr21	14435216	14435461	14435220	non_blind	5	13161045	0	0	-3.70074e-16
chr21	14435862	14436010	14436006	non_blind	3	13161046	0	0	-3.70074e-16
chr21	14436007	14436085	14436011	non_blind	5	13161047	0	0	-3.70074e-16
chr21	14436190	14436383	14436379	non_blind	3	13161048	0	0	-3.70074e-16
chr21	14436380	14436697	14436384	blind	5	13161049	0	0	-3.70074e-16
chr21	14436890	14437017	14436894	non_blind	5	13161053	0	0	-3.70074e-16
chr21	14437178	14437338	14437334	non_blind	3	13161054	0	0	-3.70074e-16
chr21	14437335	14437553	14437339	non_blind	5	13161055	0	0	-3.70074e-16
chr21	14437631	14437676	14437635	blind	5	13161057	0	0	-3.70074e-16
chr21	14437631	14437676	14437672	blind	3	13161058	0	0	-3.70074e-16
chr21	14437673	14437884	14437677	blind	5	13161059	0	0	-3.70074e-16
chr21	14437673	14437884	14437880	blind	3	13161060	0	0	-3.70074e-16
chr21	14438767	14438917	14438913	non_blind	3	13161062	0	0	-3.70074e-16
chr21	14438914	14439135	14438918	blind	5	13161063	0	0	-3.70074e-16
chr21	14438914	14439135	14439131	blind	3	13161064	0	0	-3.70074e-16
chr21	14439132	14439187	14439136	non_blind	5	13161065	0	0	-3.70074e-16
chr21	14439524	14439575	14439571	non_blind	3	13161072	0	0	-3.70074e-16
chr21	14439572	14439611	14439576	blind	5	13161073	0	0	-3.70074e-16
chr21	14439572	14439611	14439607	blind	3	13161074	0	0	-3.70074e-16
chr21	14439608	14439764	14439612	blind	5	13161075	0	0	-3.70074e-16
chr21	14439608	14439764	14439760	blind	3	13161076	0	0	-3.70074e-16
chr21	14439761	14440314	14439765	non_blind	5	13161077	0	0	-3.70074e-16
chr21	14440698	14440875	14440871	blind	3	13161080	0	0	-3.70074e-16
chr21	14440872	14440917	14440876	non_blind	5	13161081	0	0	-3.70074e-16
chr21	14442127	14442150	14442146	non_blind	3	13161082	0	0	-3.70074e-16
chr21	14442147	14442530	14442151	blind	5	13161083	0	0	-3.70074e-16
chr21	14442147	14442530	14442526	blind	3	13161084	0	0	-3.70074e-16
chr21	14442527	14442647	14442531	non_blind	5	13161085	0	0	-3.70074e-16
chr21	14443687	14443712	14443708	non_blind	3	13161086	0	0	-3.70074e-16
chr21	14443709	14444281	14443713	non_blind	5	13161087	0	0	-3.70074e-16
chr21	14444912	14444932	14444928	non_blind	3	13161088	0	0	-3.70074e-16
chr21	14444929	14445195	14444933	non_blind	5	13161089	0	0	-3.70074e-16
chr21	14445374	14445857	14445853	non_blind	3	13161090	0	0	-3.70074e-16
chr21	14445854	14446008	14445858	blind	5	13161091	0	0	-3.70074e-16
chr21	14445854	14446008	14446004	blind	3	13161092	0	0	0.0426885
chr21	14446005	14446073	14446009	blind	5	13161093	0	0	0.0426885
chr21	14446005	14446073	14446069	blind	3	13161094	0	0	0.0426885
chr21	14446070	14446135	14446074	blind	5	13161095	0	0	0.0426885
chr21	14446070	14446135	14446131	blind	3	13161096	0	0	0.0426885
chr21	14446132	14446200	14446136	non_blind	5	13161097	0	0	0.0426885
chr21	14446197	14446241	14446237	non_blind	3	13161098	0	0	0.0426885
chr21	14446529	14446593	14446589	non_blind	3	13161100	0	0	0.0426885
chr21	14446605	14446675	14446609	blind	5	13161105	0	0	0.0426885
chr21	14446605	14446675	14446671	blind	3	13161106	0	0	0.0426885
chr21	14446672	14446740	14446676	non_blind	5	13161107	1	0.896458	0.0426885
chr21	14447737	14448038	14448034	non_blind	3	13161108	0	0	0.0426885
chr21	14448035	14448112	14448108	blind	3	13161110	0	0	0.0426885
chr21	14448194	14448705	14448701	non_blind	3	13161112	0	0	0.0426885
chr21	14448702	14448913	14448706	blind	5	13161113	0	0	0.0426885
chr21	14448702	14448913	14448909	blind	3	13161114	0	0	0.0426885
chr21	14448910	14449118	14448914	non_blind	5	13161115	0	0	0.0426885
chr21	14450146	14450185	14450181	non_blind	3	13161120	0	0	0.0426885
chr21	14450182	14450604	14450186	non_blind	5	13161121	0	0	0.0426885
chr21	14450708	14450755	14450751	non_blind	3	13161122	0	0	0.0426885
chr21	14450752	14450866	14450756	non_blind	5	13161123	0	0	0.0426885
chr21	14450863	14451008	14451004	non_blind	3	13161124	0	0	-3.70074e-16
chr21	14451005	14451126	14451009	non_blind	5	13161125	0	0	-3.70074e-16
chr21	14452424	14452464	14452460	non_blind	3	13161126	0	0	-3.70074e-16
chr21	14452470	14452617	14452474	blind	5	13161129	0	0	-3.70074e-16
chr21	14452470	14452617	14452613	blind	3	13161130	0	0	-3.70074e-16
chr21	14452614	14452722	14452618	blind	5	13161131	0	0	-3.70074e-16
chr21	14452614	14452722	14452718	blind	3	13161132	0	0	-3.70074e-16
chr21	14452719	14452799	14452723	blind	5	13161133	0	0	-3.70074e-16
chr21	14452719	14452799	14452795	blind	3	13161134	0	0	-3.70074e-16
chr21	14452796	14452836	14452800	non_blind	5	13161135	0	0	-3.70074e-16
chr21	14453033	14453245	14453241	non_blind	3	13161136	0	0	-3.70074e-16
chr21	14453242	14453500	14453246	non_blind	5	13161137	0	0	-3.70074e-16
chr21	14454517	14454552	14454548	non_blind	3	13161138	0	0	-3.70074e-16
chr21	14454549	14454649	14454553	non_blind	5	13161139	0	0	-3.70074e-16
chr21	14454646	14454728	14454724	non_blind	3	13161140	0	0	-3.70074e-16
chr21	14454725	14454876	14454729	blind	5	13161141	0	0	-3.70074e-16
chr21	14454725	14454876	14454872	blind	3	13161142	0	0	-3.70074e-16
chr21	14454873	14455068	14454877	non_blind	5	13161143	0	0	-3.70074e-16
chr21	14455340	14455373	14455369	non_blind	3	13161144	0	0	-3.70074e-16
chr21	14455370	14455473	14455374	blind	5	13161145	0	0	-3.70074e-16
chr21	14455370	14455473	14455469	blind	3	13161146	0	0	-3.70074e-16
chr21	14455470	14455519	14455474	non_blind	5	13161147	0	0	-3.70074e-16
chr21	14455599	14455827	14455823	non_blind	3	13161148	0	0	-3.70074e-16
chr21	14455824	14455874	14455828	non_blind	5	13161149	0	0	-3.70074e-16
chr21	14456667	14456824	14456820	non_blind	3	13161150	0	0	-3.70074e-16
chr21	14456833	14456857	14456837	blind	5	13161153	0	0	-3.70074e-16
chr21	14456833	14456857	14456853	blind	3	13161154	0	0	-3.70074e-16
chr21	14456854	14456903	14456858	non_blind	5	13161155	0	0	-3.70074e-16
chr21	14457003	14457129	14457125	non_blind	3	13161156	0	0	-3.70074e-16
chr21	14457126	14457237	14457130	non_blind	5	13161157	0	0	-3.70074e-16
chr21	14457495	14457851	14457847	non_blind	3	13161158	0	0	-3.70074e-16
chr21	14457848	14457887	14457852	non_blind	5	13161159	0	0	-3.70074e-16
chr21	14458785	14458966	14458962	non_blind	3	13161160	0	0	-3.70074e-16
chr21	14458963	14459752	14458967	non_blind	5	13161161	0	0	-3.70074e-16
chr21	14459812	14459904	14459900	non_blind	3	13161162	0	0	-3.70074e-16
chr21	14459901	14459961	14459905	non_blind	5	13161163	0	0	-3.70074e-16
chr21	14460012	14460176	14460172	non_blind	3	13161164	0	0	-3.70074e-16
chr21	14460173	14460192	14460177	blind	5	13161165	0	0	-3.70074e-16
chr21	14460173	14460192	14460188	blind	3	13161166	0	0	-3.70074e-16
chr21	14460189	14460587	14460193	non_blind	5	13161167	0	0	-3.70074e-16
chr21	14460598	14461019	14460602	non_blind	5	13161169	0	0	-3.70074e-16
chr21	14461016	14461072	14461068	non_blind	3	13161170	0	0	-3.70074e-16
chr21	14461069	14461102	14461073	non_blind	5	13161171	0	0	-3.70074e-16
chr21	14461107	14461265	14461261	non_blind	3	13161172	0	0	-3.70074e-16
chr21	14461262	14461327	14461266	blind	5	13161173	0	0	-3.70074e-16
chr21	14461262	14461327	14461323	blind	3	13161174	0	0	-3.70074e-16
chr21	14461324	14461596	14461328	non_blind	5	13161175	0	0	-3.70074e-16
chr21	14462164	14462486	14462482	non_blind	3	13161176	0	0	-3.70074e-16
chr21	14462483	14462566	14462562	blind	3	13161178	0	0	-3.70074e-16
chr21	14462563	14462970	14462567	blind	5	13161179	0	0	-3.70074e-16
chr21	14462563	14462970	14462966	blind	3	13161180	0	0	-3.70074e-16
chr21	14462967	14463113	14462971	non_blind	5	13161181	0	0	-3.70074e-16
chr21	14463110	14463341	14463337	non_blind	3	13161182	0	0	0.0426885
chr21	14463338	14463359	14463342	non_blind	5	13161183	0	0	0.0426885
chr21	14463541	14464166	14464162	non_blind	3	13161184	0	0	0.0426885
chr21	14464163	14464744	14464167	non_blind	5	13161185	0	0	0.0426885
chr21	14464741	14464815	14464811	non_blind	3	13161186	0	0	0.0426885
chr21	14464812	14464978	14464816	non_blind	5	13161187	0	0	0.0426885
chr21	14465705	14465749	14465709	non_blind	5	13161191	0	0	0.0426885
chr21	14465777	14465938	14465934	non_blind	3	13161192	0	0	0.0426885
chr21	14465935	14466002	14465939	non_blind	5	13161193	0	0	0.0426885
chr21	14466250	14466387	14466254	non_blind	5	13161195	0	0	0.0426885
chr21	14466384	14466410	14466406	non_blind	3	13161196	1	0.896458	0.0426885
chr21	14466407	14466671	14466411	blind	5	13161197	0	0	0.0426885
chr21	14466407	14466671	14466667	blind	3	13161198	0	0	0.0426885
chr21	14466668	14466715	14466672	non_blind	5	13161199	0	0	0.0426885
chr21	14467063	14467138	14467134	non_blind	3	13161200	0	0	0.0426885
chr21	14467135	14467339	14467139	non_blind	5	13161201	0	0	0.0426885
chr21	14467336	14467384	14467380	non_blind	3	13161202	0	0	0.0426885
chr21	14467381	14467778	14467385	non_blind	5	13161203	0	0	0.0426885
chr21	14468392	14468688	14468684	non_blind	3	13161204	0	0	0.0426885
chr21	14468685	14469286	14468689	non_blind	5	13161205	0	0	0.0426885
chr21	14469574	14469628	14469624	non_blind	3	13161206	0	0	0.0426885
chr21	14469625	14469675	14469629	blind	5	13161207	0	0	-3.70074e-16
chr21	14469625	14469675	14469671	blind	3	13161208	0	0	-3.70074e-16
chr21	14469672	14469893	14469676	blind	5	13161209	0	0	-3.70074e-16
chr21	14469672	14469893	14469889	blind	3	13161210	0	0	-3.70074e-16
chr21	14469897	14469981	14469977	non_blind	3	13161212	0	0	-3.70074e-16
chr21	14469978	14469996	14469982	blind	5	13161213	0	0	-3.70074e-16
chr21	14469978	14469996	14469992	blind	3	13161214	0	0	-3.70074e-16
chr21	14469993	14470024	14469997	non_blind	5	13161215	0	0	-3.70074e-16
chr21	14470021	14470222	14470218	non_blind	3	13161216	0	0	-3.70074e-16
chr21	14470241	14470488	14470484	non_blind	3	13161218	0	0	-3.70074e-16
chr21	14470485	14470566	14470489	non_blind	5	13161219	0	0	-3.70074e-16
chr21	14470563	14470601	14470597	non_blind	3	13161220	0	0	-3.70074e-16
chr21	14470598	14470648	14470602	non_blind	5	13161221	0	0	-3.70074e-16
chr21	14471867	14472046	14472042	non_blind	3	13161222	0	0	-3.70074e-16
chr21	14472043	14472264	14472047	non_blind	5	13161223	0	0	-3.70074e-16
chr21	14472261	14472442	14472438	non_blind	3	13161224	0	0	-3.70074e-16
chr21	14472439	14472768	14472443	non_blind	5	13161225	0	0	-3.70074e-16
chr21	14472765	14472933	14472929	non_blind	3	13161226	0	0	-3.70074e-16
chr21	14472930	14472980	14472934	non_blind	5	13161227	0	0	-3.70074e-16
chr21	14472980	14473029	14472984	non_blind	5	13161229	0	0	-3.70074e-16
chr21	14473026	14473179	14473175	non_blind	3	13161230	0	0	-3.70074e-16
chr21	14473176	14473195	14473180	blind	5	13161231	0	0	-3.70074e-16
chr21	14473176	14473195	14473191	blind	3	13161232	0	0	-3.70074e-16
chr21	14473192	14473321	14473196	blind	5	13161233	0	0	-3.70074e-16
chr21	14473192	14473321	14473317	blind	3	13161234	0	0	-3.70074e-16
chr21	14473318	14474017	14473322	non_blind	5	13161235	0	0	-3.70074e-16
chr21	14474214	14474302	14474298	non_blind	3	13161236	0	0	-3.70074e-16
chr21	14474299	14474374	14474303	non_blind	5	13161237	0	0	-3.70074e-16
chr21	14474415	14474553	14474549	non_blind	3	13161238	0	0	-3.70074e-16
chr21	14474550	14474691	14474554	blind	5	13161239	0	0	-3.70074e-16
chr21	14474550	14474691	14474687	blind	3	13161240	0	0	-3.70074e-16
chr21	14474688	14474758	14474692	non_blind	5	13161241	0	0	-3.70074e-16
chr21	14474848	14475303	14475299	non_blind	3	13161242	0	0	-3.70074e-16
chr21	14475300	14475915	14475304	blind	5	13161243	0	0	-3.70074e-16
chr21	14476089	14476593	14476589	non_blind	3	13161248	0	0	-3.70074e-16
chr21	14476590	14476870	14476594	blind	5	13161249	0	0	-3.70074e-16
chr21	14476590	14476870	14476866	blind	3	13161250	0	0	-3.70074e-16
chr21	14476867	14476913	14476871	non_blind	5	13161251	0	0	-3.70074e-16
chr21	14477657	14477678	14477674	non_blind	3	13161252	0	0	-3.70074e-16
chr21	14479264	14479452	14479268	blind	5	13161257	0	0	-3.70074e-16
chr21	14479264	14479452	14479448	blind	3	13161258	0	0	-3.70074e-16
chr21	14479449	14479496	14479453	non_blind	5	13161259	0	0	-3.70074e-16
chr21	14479493	14479559	14479555	non_blind	3	13161260	0	0	-3.70074e-16
chr21	14479556	14479831	14479560	non_blind	5	13161261	0	0	-3.70074e-16
chr21	14480018	14480076	14480072	non_blind	3	13161264	0	0	-3.70074e-16
chr21	14480073	14480413	14480077	non_blind	5	13161265	0	0	-3.70074e-16
chr21	14480410	14480575	14480571	non_blind	3	13161266	0	0	-3.70074e-16
chr21	14480572	14480749	14480576	blind	5	13161267	0	0	-3.70074e-16
chr21	14480572	14480749	14480745	blind	3	13161268	0	0	-3.70074e-16
chr21	14480746	14480888	14480750	non_blind	5	13161269	0	0	-3.70074e-16
chr21	14482074	14482117	14482078	blind	5	13161273	0	0	-3.70074e-16
chr21	14482074	14482117	14482113	blind	3	13161274	0	0	-3.70074e-16
chr21	14482114	14482447	14482118	non_blind	5	13161275	0	0	-3.70074e-16
chr21	14482444	14482698	14482694	non_blind	3	13161276	0	0	-3.70074e-16
chr21	14482695	14482772	14482699	non_blind	5	13161277	0	0	-3.70074e-16
chr21	14482769	14482823	14482819	non_blind	3	13161278	0	0	-3.70074e-16
chr21	14482820	14482845	14482824	blind	5	13161279	0	0	-3.70074e-16
chr21	14482820	14482845	14482841	blind	3	13161280	0	0	-3.70074e-16
chr21	14482842	14482905	14482846	non_blind	5	13161281	0	0	-3.70074e-16
chr21	14483052	14483109	14483056	non_blind	5	13161283	0	0	-3.70074e-16
chr21	14483213	14483297	14483293	non_blind	3	13161284	0	0	-3.70074e-16
chr21	14483294	14483427	14483298	non_blind	5	13161285	0	0	-3.70074e-16
chr21	14483581	14483680	14483676	non_blind	3	13161286	0	0	-3.70074e-16
chr21	14483677	14483718	14483681	non_blind	5	13161287	0	0	-3.70074e-16
chr21	14483867	14484085	14484081	non_blind	3	13161288	0	0	-3.70074e-16
chr21	14484082	14484363	14484086	non_blind	5	13161289	0	0	-3.70074e-16
chr21	14484793	14484817	14484797	non_blind	5	13161293	0	0	-3.70074e-16
chr21	14484834	14484866	14484862	non_blind	3	13161294	0	0	-3.70074e-16
chr21	14484863	14485431	14484867	blind	5	13161295	0	0	-3.70074e-16
chr21	14484863	14485431	14485427	blind	3	13161296	0	0	-3.70074e-16
chr21	14485428	14485951	14485432	non_blind	5	13161297	0	0	-3.70074e-16
chr21	14485948	14485977	14485973	non_blind	3	13161298	0	0	-3.70074e-16
chr21	14485974	14486171	14485978	non_blind	5	13161299	0	0	-3.70074e-16
chr21	14486362	14486390	14486386	non_blind	3	13161300	0	0	-3.70074e-16
chr21	14486387	14486541	14486391	blind	5	13161301	0	0	-3.70074e-16
chr21	14486387	14486541	14486537	blind	3	13161302	0	0	-3.70074e-16
chr21	14486538	14486565	14486542	non_blind	5	13161303	0	0	-3.70074e-16
chr21	14486988	14487050	14487046	non_blind	3	13161304	0	0	-3.70074e-16
chr21	14487047	14487421	14487051	blind	5	13161305	0	0	-3.70074e-16
chr21	14487047	14487421	14487417	blind	3	13161306	0	0	-3.70074e-16
chr21	14487418	14487546	14487422	non_blind	5	13161307	0	0	-3.70074e-16
chr21	14487915	14488194	14488190	non_blind	3	13161308	0	0	-3.70074e-16
chr21	14488191	14488307	14488195	blind	5	13161309	0	0	-3.70074e-16
chr21	14488191	14488307	14488303	blind	3	13161310	0	0	-3.70074e-16
chr21	14488304	14488629	14488308	non_blind	5	13161311	0	0	-3.70074e-16
chr21	14488643	14488877	14488873	non_blind	3	13161312	0	0	-3.70074e-16
chr21	14488874	14488974	14488878	blind	5	13161313	0	0	-3.70074e-16
chr21	14488874	14488974	14488970	blind	3	13161314	0	0	-3.70074e-16
chr21	14488971	14489130	14488975	non_blind	5	13161315	0	0	-3.70074e-16
chr21	14489788	14489975	14489971	non_blind	3	13161316	0	0	-3.70074e-16
chr21	14489972	14490546	14489976	non_blind	5	13161317	0	0	-3.70074e-16
chr21	14490744	14490919	14490915	non_blind	3	13161318	0	0	-3.70074e-16
chr21	14490916	14491156	14490920	non_blind	5	13161319	0	0	-3.70074e-16
chr21	14491716	14491924	14491920	non_blind	3	13161320	0	0	-3.70074e-16
chr21	14491921	14492270	14491925	non_blind	5	13161321	0	0	-3.70074e-16
chr21	14492271	14492322	14492318	non_blind	3	13161322	0	0	-3.70074e-16
chr21	14492319	14492412	14492323	blind	5	13161323	0	0	-3.70074e-16
chr21	14492319	14492412	14492408	blind	3	13161324	0	0	-3.70074e-16
chr21	14492409	14492499	14492413	non_blind	5	13161325	0	0	-3.70074e-16
[truncated: 93,088 more rows]

## Sheet: 3C_3D_3E_3F
Repeat1									Repeat2									Repeat3
[truncated: 587 more rows]
