# Supplementary material for: Ligand-dependent enhancer activation indirectly modulates non-target promoters in a chromatin domain
Source: eLife. 2026 Jul 7;13:RP102417. doi: 10.7554/eLife.102417 (PMC13341115; doi:10.7554/eLife.102417)
Supplement: Figure 4—figure supplement 1—source data 1. [file elife-102417-fig4-figsupp1-data1.xlsx]

## Sheet: SUPP_4B_4C
1HR TFF1-GAPDH	InTFF1	GAPDH	ERAlphaGFP mean intensity		1HR TFF1-TFF3	InTFF1	InTFF3	ERAlphaGFP mean intensity
	0	1707	4439.3			0	0	6970.3
	2	981	3370.9			2	0	2509.8
	5	832	452.43			1	0	4392.1
	131	1010	188.29			32	38	340.75
	71	1454	180.89			10	0	398.07
	55	1432	137.84			150	2	366.79
	38	702	262.39			21	1	224.05
	8	370	571.15			34	1	137.06
	158	1011	244.32			34	51	373.07
	5	944	104.44			30	1	347.39
	55	875	154.16			37	3	345.42
	31	745	160.99			156	3	366.98
	32	1021	114.65			38	2	313.47
	8	555	22.975			15	3	291.17
	26	777	37.74			70	3	342.59
	172	1162	101.69			109	8	365.35
	23	652	78.785			59	0	453.89
	4	698	46.072			1	0	4635.4
	5	923	99.076			2	0	4176.6
	82	1765	181.6			87	2	465.85
	34	1034	247.58			3	41	490.79
	8	1260	238.03			29	1	473.21
	4	292	560.97			34	53	412
	12	672	198.3			87	1	311.86
	44	1233	254.81			112	1	397.25
	125	777	150.12			24	2	400.85
	29	882	233.12			30	3	321.18
	25	1336	190.94			151	5	408.23
	77	1435	50.839			49	2	348.43
	6	1211	132.75			97	3	432.94
	9	762	196.24			12	11	312.75
	125	1440	101.36			59	4	310.64
	28	773	182.42			72	4	340.76
	23	1345	200.22			104	9	373.47
	17	589	129.58			50	1	348.4
	3	757	1965.6			11	1	373.58
	5	887	1016.53			1	16	371.46
	6	1031	1239.3			2	14	398.32
	108	963	377.7			44	4	372.02
	4	856	1161.8			5	3	364
	81	1556	513.48			37	2	408.68
	4	511	422.09			30	0	453.84
	156	375	335.61			20	2	404.97
	24	1290	780.28			21	1	429.41
	136	632	462.77			71	1	440.6
	33	765	400.39			98	2	408.29
	127	745	352.24			5	19	618.57
	19	1102	330.25			6	17	507.18
	7	716	301.43			0	0	5162.6
	8	1120	318.54			0	0	7420.8
	19	885	403.7			1	0	4448.2
	55	1243	346.1			2	0	6662.2
	19	322	547.17			1	0	3899
	2	1193	2574.3			0	0	3875.8
	1	989	2089.2			2	1	2845.5
	3	624	2253.2			1	21	271.91
	14	1010	1726.6			7	12	315.61
	11	565	1146.6			1	16	233.75
	9	955	1426.7			68	2	295.88
	22	376	1129.4			37	4	308.05
	104	1439	407.16			13	39	334.14
	31	1134	234.78			44	1	387.81
	27	1099	291.28			123	2	344.52
	60	1530	325.46			100	6	410.65
	5	721	306.2			28	7	376.45
	9	532	406.11			33	0	436.57
	64	467	263.56			105	4	448.43
	16	1113	329.76			34	0	494.69
	234	631	467.9			12	9	376.86
	35	745	282.1			47	1	313.69
	42	999	288.46			25	3	341.44
	4	978	473.96			34	1	360.97
	41	1345	468.05			1	0	4054.2
	6	1619	981.39			1	0	7253.6
	12	1442	791.07			0	0	3352.3
	0	847	1208			2	0	2141
	7	1108	968.39			3	1	3122.7
	6	1207	1345.6			5	1	1841.1
	11	1145	495.61			3	14	853.5
	4	880	892.34			1	0	2168.7
	2	963	919.67			0	0	3506.7
	111	1234	131.05			0	0	4543.7
	125	1256	126.61			139	4	324.7
	116	835	216.292			15	28	378.65
	3	1043	226.381			54	1	419.23
	16	1256	178.777			45	9	307.57
	3	733	215.56			30	1	293.21
	41	1055	198.61			22	13	413.14
	1	1380	114.32			31	2	415.82
	28	1288	161.05			135	0	355.93
	0	856	4813.2			113	3	264.74
	7	1011	4198.8			1	42	376.53
	1	1177	2999.5			32	10	413.1
	278	502	187.092			43	1	298.04
	4	786	163.94			1	0	5287.1
	68	1326	181.122			1	0	2046.8
	28	1041	53.214			0	0	2460.9
	89	978	133.09			1	1	2031.3
	18	1189	152.7			0	0	2284
	34	755	159.65			1	2	2753.5
	8	912	168.46			10	1	1787.1
	4	756	1287.6			7	25	378.53
	2	1127	1563.5			48	2	311.42
	27	934	194.68			63	4	387.3
	3	1212	1103.48			29	1	312.21
	39	999	188.644			30	6	210.37
	22	812	201.89			6	27	308.68
	3	721	199.68			0	4	2301
	41	1063	160.78			2	0	4134.7
	56	1211	201.53			1	0	4171.1
	30	402	182.876			26	2	364.66
	11	794	1022.6			25	1	643.08
	0	1311	1821.7			11	8	493.41
	12	912	1015.7			114	6	510.34
	4	1249	2264.1			35	3	441.04
	2	797	4679.3			0	0	3433.1
	3	722	1542.3			1	0	3196.5
	1	1145	2964.5			4	1	1547.9
	21	1088	394.61			0	0	4323.2
	38	1439	262.17			1	0	2749.7
	20	455	222.47			0	0	5095.9
	6	628	234.37			0	0	7243.1
	87	1022	248.77			2	0	2920.2
	4	477	295.61			0	0	5542.7
	74	1245	280.97			1	1	4979
	2	646	264.71			7	29	272.51
	38	1109	205.61			51	2	326.72
	11	845	310.59			59	3	430.76
	40	722	251.27			156	5	261.25
	1	1397	1904.4			21	5	323.05
	2	1093	1995.8			19	21	275.9
	41	1201	566			18	0	348.71
	1	988	2651			16	1	220.59
	0	1004	4494.2			37	3	333.65
	6	1391	2169.3			2	0	3879.2
	1	825	1651.8			0	0	4572.9
	9	849	1108.6			2	2	2934.1
	1	1065	3532.3			0	0	3381.6
	2	884	3255.5			10	55	465.21
	1	1460	4620.5			74	1	439.45
	0	1178	1783.1			34	4	421.51
	3	271	1024.7			23	2	439.13
	1	344	963.2			0	0	9633
	0	809	1512.4			0	0	9667
	0	1309	6999.3			24	0	441.9
	0	1848	4264.6			23	1	388.38
	0	1931	5221.9			4	73	456.71
	0	1338	9098			37	1	216.73
	0	1302	3666.2			66	2	441.65
	0	1177	3350			2	0	3720.7
	1	777	3616.3			2	4	2745.1
	6	440	268.22			2	0	1866.6
	23	1113	335.66			2	7	1501.8
	65	1282	359.66			41	5	367.78
	67	1160	266.98			35	1	406.74
	9	996	474.46			4	1	990.69
	95	1445	244.97			3	0	3103
	21	1310	350.58			2	0	1901.4
	46	1128	403.6			0	0	3005.8
	29	1033	349.57			1	0	3140.8
	112	1119	269.4			1	1	2801.5
	41	1080	330.43			1	0	4096.7
	29	1104	344.83			3	9	1801.3
	12	1209	507.64			58	0	459.43
	0	1187	3102.2			36	2	460.26
	5	1185	1439.1			75	1	412.25
	9	866	978.64			153	2	428.87
	1	1035	3673.8			66	3	454.83
	7	999	1594.3			2	13	437.52
	2	1083	1145.8			29	59	423.13
	88	979	368.48
	49	978	418.56
	35	1573	391.46
	15	412	404.12
	58	565	337.51
	1	1021	6913.4
	0	1117	9148.4
	56	1401	711.6
	4	1133	2940.7
	3	811	2641.7
	7	1425	1345.2
	20	823	950.1
	0	774	2589.4
	1	450	1918.8
	2	364	2086.6
	1	1547	3446.3
	2	1208	1963.7
	2	1264	1380
	68	1563	612.4
	128	1182	437.74
	46	1284	381.64
	1	469	1699.1
	6	1272	1345.6
	11	1614	1503.7
	0	1201	6375.3
	2	1120	2756.8
	5	929	1546
	1	769	1137.2
	115	1114	250.71
	12	745	380.67
	89	1245	297.14
	45	734	280.13
	30	612	263.74
	45	695	335.07
	80	1135	314.69
	43	876	375.71
	51	851	433.64
	18	712	351.89
	0	655	3077.9
	2	895	1160
	0	1096	3598.6
	1	1244	2190.5
	2	1096	2117.1
	177	1429	314.9
	43	478	219.58
	26	611	318.37
	64	545	332.46
	36	997	316.72
	28	481	246.19
	19	925	428.26

## Sheet: SUPP_4E
1HR	InTFF1	InTFF3	EGFP-C1 Mean intensity
	12	57	2391.5
	71	14	3110.3
	124	9	2085.9
	8	1	2543.4
	146	11	2132.8
	27	13	1113.2
	13	0	1197.9
	54	5	1051.4
	8	24	417.39
	51	5	751.1
	64	9	2144.4
	125	8	3319.1
	53	25	3528.7
	1	24	2885
	36	1	1220.8
	17	5	1509.8
	132	7	934.7
	3	2	1194.4
	40	2	1212.6
	17	27	8745
	31	1	10170
	35	22	9817
	54	2	5625.2
	31	1	5979.2
	143	2	539.2
	53	3	3352.2
	63	4	1173
	10	3	931.4
	36	2	552.5
	56	1	1231.7
	19	40	1369.8
	3	1	382
	29	1	769.8
	41	2	533.7
	38	2	3893.1
	19	58	3327.2
	52	12	3614.6
	8	4	2724
	32	2	1268
	35	1	444.9
	12	21	1081.7
	46	4	666.3
	16	0	1423.4
	22	4	1269.2
	81	9	3633.2
	4	19	2787.2
	5	2	2755.6
	7	15	2524.4
	19	20	3106.9
	5	3	1215.6
	20	40	1288.7
	70	9	1047.7
	65	9	875.62
	41	4	839.91
	38	2	1246.2
	95	5	5042.7
	41	11	2322.6
	69	14	2376.7
	13	4	2427.5
	17	36	1191.9
	29	2	1063.8
	24	1	518.3
	35	3	1190.2
	75	2	1087.3
	21	7	1147.6
	2	71	977.3
	61	1	1177.6
	12	5	1165.1
	14	5	469.2
	39	4	995.7
	38	11	4300.2
	41	74	3385.3
	77	4	2738.5
	49	6	3993.7
	82	2	328.5
	24	1	655.8
	19	2	1063.6
	8	34	1511.3
	77	3	648
	44	9	1262.4
	4	1	1062.7
	37	2	1059.2
	71	8	164.5
	15	1	1276.8
	48	2	3171.6
	70	9	3523.8
	67	0	951.3
	36	1	665.62
	45	0	569.91
	18	1	500.73
	34	1	361.37
	39	1	607.22
	18	0	630.35
	15	1	461.92
	81	5	2866.6
	16	7	908.5
	46	3	4689
	50	2	3517.9
	38	3	2252
	44	2	2549.1
	33	13	2588.9
	19	1	753.6
	44	1	1188.8
	36	4	1010.1
	2	6	1035.1
	48	1	855.7
	4	0	124.3
	11	1	303.6
	29	2	1123.3
	2	25	858.8
	32	3	1368.8
	40	1	1222
	27	5	1032.6
	20	0	1065.7
	11	2	975.3
	17	6	4421.9
	66	3	1166.2
	51	1	1242.9
	42	2	1009.6
	105	3	1066.1
	72	3	2167.9
	36	19	4904.3
	49	2	2876.1
	29	4	1190.5
	2	29	1201.9
	38	2	1253.2
	39	2	1397.8
	53	1	1199.2
	61	6	1170.7
	31	2	899.2
	58	7	11227
	83	11	12371
	63	1	987.7
	31	2	1262.9
	46	1	1077.5
	47	7	669.9
	82	6	837.6
	147	5	7012.4
	128	19	4548.4
	38	1	1130.1
	19	1	1220.8
	34	0	1292.9
	36	3	554.1
	11	33	779.9
	65	6	75.8
	126	3	828
