# Supplementary material for: Ligand-dependent enhancer activation indirectly modulates non-target promoters in a chromatin domain
Source: eLife. 2026 Jul 7;13:RP102417. doi: 10.7554/eLife.102417 (PMC13341115; doi:10.7554/eLife.102417)
Supplement: Figure 4—source data 1. [file elife-102417-fig4-data1.xlsx]

## Sheet: 4B_4C_4D_4E_4F
Repeat1													Repeat2													Repeat3
Uninduced	InTFF1	InTFF3	ERAlpha mean intensity	1HR	InTFF1	InTFF3	ERAlpha mean intensity	3HR	InTFF1	InTFF3	ERAlpha mean intensity		Uninduced	InTFF1	InTFF3	ERAlpha mean intensity	1HR	InTFF1	InTFF3	ERAlpha mean intensity	3HR	InTFF1	InTFF3	ERAlpha mean intensity		Uninduced	InTFF1	InTFF3	ERAlpha mean intensity	1HR	InTFF1	InTFF3	ERAlpha mean intensity	3HR	InTFF1	InTFF3	ERAlpha mean intensity
	45	4	103.46		15	22	765.9		2	1	1008.91			0	1	1029.7		22	1	2002.5		55	0	2870.1			1	0	4921.2		98	4	9052.3		2	62	5478.9
	0	2	299.38		28	10	770.84		45	2	350.38			7	1	1052.2		87	1	3172.1		11	1	3989.4			1	1	4545.5		5	1	8949.4		2	22	5944.3
	35	0	291.64		30	52	983.76		1	3	211.59			9	1	1129.4		59	4	2230.2		36	0	3198.8			2	0	4829.9		78	2	8994.2		102	12	4833.9
	3	10	329.73		88	3	606.42		43	3	415.06			0	2	767.24		41	6	4466.1		45	3	3188.2			3	1	4842.3		94	1	9360.8		26	0	4810.1
	15	0	206.95		19	1	1348.9		2	22	282.88			10	1	985.96		55	1	2008.3		44	8	2629.6			0	0	6431.2		45	1	8420.3		28	1	5846.3
	0	5	190.94		39	3	1380.4		4	14	407.01			5	11	553.23		3	0	2302.9		8	7	3907.8			4	0	5010.1		25	19	7544.3		23	0	4571.1
	1	4	191.29		33	4	772.89		1	12	907.7			0	0	1184.5		49	3	1824.7		22	6	4310.9			0	6	5025.4		63	9	9001.7		22	2	5967.9
	28	3	471.25		14	1	560.71		1	13	643.38			39	5	1695.3		69	2	2583.8		168	7	1572.8			0	0	5543.8		31	1	9120.6		2	7	5681.7
	0	0	481.11		25	2	1052.2		13	2	624.83			1	15	975.48		24	1	3017.7		0	9	2740.9			3	5	6279.1		32	9	9290.3		5	3	6030.3
	0	2	135.04		6	18	979.29		2	14	714.57			65	4	1194.7		66	1	1994.6		11	2	2916.4			1	0	6826.9		12	0	10026		1	3	5474
	2	0	244.52		58	18	682.08		1	5	651.79			2	12	728.32		71	2	1962.4		8	5	3265.7			0	2	5197.2		5	0	10087		3	71	5051.6
	22	0	187.21		1	6	942.56		1	1	922.25			18	5	1353.5		42	0	2224.5		11	7	2648.9			45	2	4667.3		1	1	10094		45	3	4884.6
	0	0	187.09		50	1	596.75		15	3	539.88			1	4	1152		70	1	673.26		62	1	1453			9	28	5368.7		2	4	9072.6		48	2	4229.7
	55	0	225.64		64	1	519.4		2	5	550.6			1	1	912.48		70	2	974.72		14	1	3143.5			16	2	5134.3		62	1	8641.3		34	7	5195
	1	2	353.39		78	10	502.71		2	8	523.67			22	19	1144.3		15	1	1737.2		1	11	605.57			2	0	4420.8		21	10	8572.4		31	1	4854.6
	0	5	167.82		1	13	897.07		1	2	319.54			0	0	1439.8		7	14	1223		0	33	2690.2			4	0	4814.5		62	4	8438.4		35	3	5151.9
	4	2	159.02		45	2	468.46		3	19	510.8			19	6	1591.4		52	4	1828.5		53	4	2362.8			4	18	4879.7		69	5	8300.8		31	4	4832.1
	1	3	275.1		30	2	1174.7		5	2	300.77			6	2	1578.3		0	11	1200.6		1	0	3074.7			11	2	4899.4		64	1	9008		15	1	5172.4
	36	0	250.36		0	0	728.53		6	39	615.22			7	3	1320.4		0	0	3379.5		33	2	2630.5			0	14	5381.1		27	0	9294.5		5	3	5378.4
	0	3	193.29		20	5	1133.7		38	6	607.23			5	14	878.33		0	0	3086.9		4	26	2585.7			0	0	4592.9		12	0	10188		9	39	5362.8
	12	0	231.01		12	6	852.55		27	4	521.78			0	6	741.87		2	22	2553.8		68	1	2598.7			0	0	4698.7		65	1	9124.2		3	7	5359
	1	1	230.73		50	6	1078.2		1	1	207.57			20	3	801.46		66	2	2014.9		11	0	4219.4			40	4	4826.4		56	1	9418.6		12	5	5473.8
	0	1	226.14		22	1	681.7		2	9	276.5			1	1	1504.4		22	1	2585.2		60	9	2556.7			1	1	3980.1		89	5	8519.7		21	16	5276.3
	44	1	169.66		21	7	614.31		42	4	738.94			5	14	862.44		2	0	3186.4		0	38	2924.5			1	11	5025.1		3	11	8028.4		42	62	5298.8
	0	0	486.63		0	5	996.92		1	12	357.84			0	2	1194.2		55	2	2189.5		11	0	4492.1			2	0	4698.6		12	23	8615.6		20	28	5511.5
	35	0	280.72		66	6	823.82		1	2	1155.4			0	1	1295.3		79	3	1947.5		0	2	2596.1			5	12	4681.4		22	28	8895.1		34	11	5483.6
	1	9	146.15		43	7	1336.9		3	2	1600.3			0	0	1520.7		77	4	3235		22	42	1953.3			1	0	4514.4		64	4	8191.9		53	3	5236.3
	1	0	129.31		30	9	730.46		2	4	1302			2	3	1123.4		2	30	1898		11	6	1889.7			3	1	5236.6		6	0	10901		58	2	5606.3
	1	0	265.76		22	6	840.67		2	1	1632.9			14	0	1505.2		6	11	2382.1		15	34	1350.7			1	0	4600.3		3	0	10993		23	3	5493.9
	3	0	382.35		11	20	895.73		2	11	374.97			0	3	1376.7		3	1	960.37		12	1	1384			11	2	5405.8		9	3	7295.7		32	2	5634
	0	0	339.2		20	70	649.91		9	39	258.27			20	1	475.26		10	20	2259.2		7	5	1932.7			1	1	5127.2		49	29	7661.5		34	3	5772.2
	0	7	249.36		71	2	1081.4		14	40	332.56			0	12	1019.6		5	1	4118.9		40	5	2245.6			3	0	5672.4		62	22	7841.4		10	5	3005
	1	0	269.33		58	6	982.41		60	15	910.1			9	1	1025.5		5	0	4063.5		0	0	2369.2			0	0	5094.5		23	31	7936.7		1	7	5389.6
	0	1	204.4		2	35	842.63		19	5	486.15			0	2	1260.2		59	2	2826.3		11	6	1958.7			1	2	4872		33	23	7020.8		18	2	5450.6
	14	4	392.06		45	20	729.78		17	23	376.56			0	2	1368.8		56	5	2976.6		23	39	2060.8			1	0	4191.1		62	27	8054.4		31	1	5099
	23	2	281.48		23	70	634.9		12	17	597.93			0	2	881.28		85	1	2396.4		8	39	852.92			0	0	4316.7		6	15	7121.3		9	38	4841.9
	0	1	312.84		8	72	613.16		15	18	280.82			1	3	964.13		198	6	2977		7	15	1064.4			33	0	4362.6		9	21	7845		3	49	5956
	0	12	676.38		20	76	632.83		33	3	819.37			0	0	1076.5		46	1	2792.9		17	0	763.62			0	0	3843		108	3	7491.4		4	11	5021.4
	35	1	162.1		8	52	678.67		1	1	1689.6			3	2	1024.1		225	4	2090.6		41	2	1108.9			39	2	3952		3	1	6923.1		47	3	5393.5
	7	2	181.26		27	1	860.78		11	12	303.84			51	2	1364.7		162	4	2417		0	0	991.9			1	0	5422.3		110	4	6974.1		24	2	5377.5
	28	6	723.55		35	5	753.78		12	23	521.18			34	7	1084.2		70	11	2466		6	11	1517.6			24	1	3853.8		61	3	7508.7		24	1	5187.4
	0	4	136.01		6	10	1918.4		54	3	304.12			2	33	1568.4		1	1	4110.1		6	19	878.78			4	0	4246.9		84	1	7312.3		10	1	5854.8
	10	2	271.99		168	8	637.78		1	24	476.65			2	18	1878.5		45	5	2487		5	1	1269.8			4	11	3870.6		35	1	7364.9		3	0	4982.7
	0	2	248.4		32	1	671.7		20	1	321.77			6	18	1891		117	33	1843.3		5	13	823.61			1	21	3956.1		3	2	6943.9		13	0	4810
	1	5	249.06		45	3	804.49		1	2	376.92			1	6	1222.5		109	2	2882		0	4	1113.8			43	2	4778.7		1	5	6355.1		27	1	4962
	17	2	275.39		90	3	528.71		12	21	514			7	11	1364		5	1	4028.1		10	26	853.32			5	1	4002.8		21	0	6924.9		1	29	7074.6
	0	2	161.91		2	3	1864.7		74	4	536.32			11	1	1515.6		9	49	2221.7		0	5	1098.4			0	3	4053.7		10	3	6780.1		2	9	8134.1
	1	0	337.63		1	3	998.1		34	4	379.13			6	21	2712.7		14	34	2287.7		9	4	805.71			3	0	3755.4		35	1	7437		2	43	7293.6
	0	0	237.58		0	1	980.59		38	39	438.89			0	3	2359.1		6	44	3026.9		21	49	1315.7			2	0	4079.9		19	22	8531		4	9	8721.2
	24	2	172.83		1	1	729.31		73	9	639.43			1	2	2526.3		84	2	2292.8		0	33	1380.2			0	0	3926.2		45	28	7788		28	55	7378.3
	2	1	139.67		25	1	977.47		36	5	458.17			1	4	2347.2		56	2	2524.7		1	15	975.69			5	1	3999.7		3	18	7245		18	45	7183.5
	3	2	360.56		27	2	1127.2		1	4	223.16			0	0	1184.4		61	14	2151.2		4	15	1294.7			0	0	4442.5		3	29	8430		12	9	8117.3
	1	1	289.56		7	1	1285.8		3	3	233.97			1	1	1208.2		9	1	1862.7		36	7	445.55			9	22	3975.8		22	21	7842		3	13	8294.5
	0	11	132.06		0	0	656.41		2	5	296.94			0	3	1254.3		1	1	2511.5		28	4	1255.1			24	0	3280.3		17	1	10104		0	3	7442.5
	0	8	842.68		26	1	1091.9		16	32	301.55			0	0	2573.4		1	2	1673.4		11	27	1096.6			4	32	3095.1		84	2	8933		30	1	7538.2
	0	1	176.6		53	5	872.58		4	5	1377.3			0	1	2501.7		66	1	2263.8		0	3	841.48			9	1	3775.1		1	29	4876		12	1	7211.3
	45	2	175.73		43	1	1616.7		1	2	1416.2			0	1	2230.1		0	4	1684.9		20	6	743.66			0	3	3189		1	24	5536.5		45	2	8448
	16	0	214.3		51	4	1494.3		6	16	503.06			0	0	2425.2		1	21	599.67		0	0	657.9			1	0	3300.3		24	11	5823.5		21	3	8752.6
	0	0	549.15		2	2	1236.8		2	19	437.54			0	0	2066.7		3	7	3909.5		0	0	602.82			0	9	3312		1	26	5166.6		9	1	7754.9
	0	22	169.08		66	42	916.4		87	9	415.03			9	3	2201		49	1	2856.5		4	2	1548.3			1	5	4345.2		145	3	6084.6		80	17	7748.2
	1	1	276.9		56	3	871.36		15	14	462			0	0	1569.7		68	4	1588.7		10	0	477.75			1	0	4312.3		93	2	6762.1		2	133	7080.3
	12	0	347.04		90	3	1487		10	25	571.79			3	1	2089.2		65	2	2256.1		18	41	2091.5			1	0	4078.5		66	3	6768.3		11	42	7830
	0	1	223.58		12	37	1017.7		14	5	1686.3			0	2	1703.7		7	6	4101.1		8	3	1641.2			0	0	4149.4		64	5	6049.3		15	36	7798.8
	46	2	334.68		2	60	1334.6		6	41	397.56			5	0	1359.5		55	2	3868.4		4	1	2157.2			0	3	4047.7		32	1	5683.4		17	1	7688.3
	0	1	183		38	2	1025.3		7	44	448.93			15	0	1811.5		5	11	3885.8		0	1	1428.2			0	0	3770.1		59	2	6523.9		21	2	7962.5
	50	2	417.05		2	2	1063.3		1	11	549.79			21	1	1069		90	8	1970.1		1	1	1923.7			2	2	3639		0	5	5396.4		50	2	8244.8
	1	2	271.28		45	2	1023.9		11	23	629.11			26	3	1329.2		80	2	2323.9		22	39	2262.6			1	0	3766.1		15	2	5722.5		15	0	7376.5
	9	2	399.16		2	9	1366.7		2	1	201.95			2	0	627.84		59	3	2709.4		8	9	2055			34	0	3466.4		11	1	6980.8		1	3	7560.7
	0	0	231.66		12	3	1571.9		62	3	460.2			2	1	1291.6		23	11	3430.5		1	1	2181.1			32	0	3858.5		2	2	5720		7	0	7974.4
	0	0	229.44		20	19	984.99		12	30	576.67			1	0	1108.1		18	15	2980		1	3	1627.8			16	3	3849.8		5	31	6684.1		14	2	7456
	11	1	246.51		15	30	698.87		2	5	1909.1			1	2	1299		0	1	1965.9		1	1	1648.7			42	1	3520.7		91	3	6804.6		0	0	10125.3
	0	1	377.26		39	2	661.83		33	4	1763.4			4	0	1159.1		0	1	1676.5		12	39	931.97			11	0	3147.6		14	1	7006.4		4	0	9999.8
	0	12	295.01		2	12	776.83		12	41	389.4			0	0	1229.4		5	17	1066.6		16	6	2063.6			1	0	3504.1		24	6	8482.7		5	9	7806.2
	0	0	332.79		27	4	1336.1		2	13	736.24			5	0	1490.8		44	2	944.61		84	19	1908.4			0	0	4379.8		45	2	8475.7		36	25	8403.9
	55	2	239.75		21	4	1039		1	53	430.5			28	0	1494.6		65	1	2653.5		0	5	1462.3			1	1	4669.7		3	12	8287.2		27	13	8920.8
	0	0	545.02		148	5	1023		5	11	239.3			0	2	832.11		55	4	2635.8		11	19	2505.4			33	2	4281.6		28	2	7291.6		59	10	8897
	35	1	220.2		15	1	1338.1		7	29	283.1			8	10	529.94		20	45	1205.4		4	12	1714.5			2	0	5298.9		3	2	7713.1		5	5	8664.7
	19	1	224.79		103	2	1844		5	16	332.83			35	0	1621.7		5	47	2664.1		22	11	1893.5			9	2	5071.1		53	2	6286.7		49	1	9141.3
	23	0	223.14		55	1	987		3	38	558.48			1	7	1607.2		30	34	1387.9		11	2	1594.2			50	2	4423.7		29	35	6684.7		73	2	8429.9
	20	1	364.62		105	10	1318.4		19	11	852.31			37	1	1279.9		148	31	2173		18	1	1897.4			41	4	5399.4		2	28	6476.5		68	1	8736
	12	2	301.07		7	2	1395		4	36	633.08			4	14	1624.9		145	23	3199.7		0	0	1683.7			3	9	4520.3		2	2	7719.3		30	3	8257.1
	28	2	161.71		25	2	879.98		56	2	553.96			6	9	1991.3		4	1	1668.1		54	5	1925.1			29	5	5458		14	1	6661.3		51	9	9075.8
	29	10	725.36		1	1	1479		2	9	431.67			19	5	1476.7		5	1	5809.5		47	62	2156.8			27	3	6012.9		17	2	6700.9		5	6	8661.3
	10	1	271.27		16	1	1860.3		19	18	476.19			2	12	803.24		14	3	4223.5		33	35	2888.2			4	1	5505.6		16	1	7721.2		1	5	8883.1
	22	2	274.64		4	23	1339.7		33	22	631.45			3	16	1607.8		143	3	3060.3		0	29	2023.2			0	11	5179.5		52	2	8342.4		16	1	9704.5
	6	1	322.9		3	1	1302.1		35	21	612.26			35	6	1339.3		19	45	2412.9		58	1	3959.8			2	9	4493.5		52	1	7400.1		2	2	9715.5
	0	32	320.88		1	1	1452.9		46	3	554.89			3	0	2402.2		15	49	2317.8		1	2	2258.8			2	9	4080.6		24	11	6520.3		33	34	6487.8
	0	20	319.43		1	21	1599.9		2	4	513.75			0	0	2005		79	7	1392.7		47	13	2682.3			1	1	5420.4		32	1	6367.1		25	10	6262.5
	9	3	446.53		1	17	1957.4		2	19	626			1	2	1106.8		10	45	2436.8		2	33	2447			0	12	6020		23	19	6671.5		3	14	6223.8
	0	13	241.14		35	2	1706.7		14	33	313.26			0	0	1578.7		0	11	1500.6		5	13	1921.5			4	0	4637.4		25	1	6436.1		7	75	7148.2
	13	1	353.17		19	5	1780		14	29	419.82			0	0	744.39		54	1	2419.2		23	31	2740.1			38	5	5195.1		48	1	7182.7		17	36	7235.1
	13	56	276.57		38	3	1289		6	35	500.69			25	3	726.62		30	35	2393.3		12	1	1964.1			16	2	5753		2	1	6623.2		5	24	7426.6
	22	11	473.87		41	1	1198.3		2	17	511.76			29	2	1244.7		157	7	2609.9		8	0	2330.3			33	1	5978.9		25	3	6444.5		11	21	7186.6
	12	40	313.37		41	4	1622.2		15	34	314.78			12	0	1043		75	2	2915.9		3	0	2338.3			29	4	5462.9		2	2	6334.9		22	23	7063.2
	5	24	331.73		18	9	1169.2		41	3	393.63			10	5	1861		59	2	3495.9		2	29	2452.8			39	0	5641		7	2	6408.9		72	2	6901.3
	55	1	415.3		11	5	1883.9		2	22	509.36			0	4	1430.9		1	6	4011.2		10	0	2126.9			7	1	4847.6		7	1	7056.3		26	2	7066.8
	6	6	248.7		22	2	1386.2		4	1	1646.54			2	25	1704.5		101	1	3318.9		19	28	1115.4			0	2	4574.6		16	2	5613.7		72	12	7336.4
	36	2	283.22		11	1	2049.3		42	6	545.15			49	12	1578.5		1	5	2576		2	1	4024			10	2	3634		53	1	6012.8		36	1	6290.2
	1	9	308.81		2	5	2045.2		2	29	417.56			35	1	1383.7		1	3	3962.6		16	1	4148.1			0	0	3983.6		47	3	5244.7		45	1	7203.6
	1	0	275.13		2	3	2710.4		63	11	393.98			40	0	952.06		98	7	2414.7		17	9	1758.7			2	10	4197.9		1	1	6089.6		51	1	6636
	6	0	128.69		2	2	1461.2		11	33	373.55			34	2	1038		76	1	3147.8		1	25	1764.3			3	0	4138.4		2	32	7013.3		44	2	6906
	1	1	150.17		2	1	1534.3		14	26	479.63			0	0	2105.7		5	28	2827.1		0	11	1871.7			11	28	3992.9		55	6	7747.4		9	0	7069.8
	2	0	123.23		36	16	775.05		55	3	419.35			0	0	1576.3		88	3	2872.6		29	29	1230.9			9	0	4560.4		89	7	7806.9		0	1	7072.8
	1	2	202.6		62	14	1221.9		68	7	684.48			7	4	1576.3		79	1	2837.6		19	10	2976.5			49	2	4367.6		16	19	5832.7		23	2	6649.3
	9	0	178.53		20	7	680.73		1	1	261.01			49	1	1801.5		57	2	2760.9		11	5	1596.4			0	0	4500.3		29	9	5630.4		0	0	7087.1
	5	1	181.7		111	3	938		3	34	648.07			56	1	3041.4		18	2	4203.3		1	33	1447.4			2	17	4185.1		12	8	5486.4		16	12	8992.1
	0	0	274.29		16	3	1503.2		14	12	803.8			6	11	1756.1		2	0	1996.7		0	29	814.37			0	5	4380.5		74	5	5810.7		40	22	8208
	5	0	154.14		3	1	1424.4		14	17	1091			6	20	1943.3		2	24	957.5		1	35	876.18			0	0	4197.8		66	10	6064.6		20	9	9447
	1	0	225.63		7	5	929.08		3	3	1788.4			2	1	2662.9		44	2	1746.3		3	14	1684.6			0	0	4513.2		68	5	6358.8		0	0	11204
	2	1	308.92		58	2	1012.5		18	11	1792.7			0	7	1069.6		48	1	2055.1		21	29	2119.8			25	3	4733.6		48	1	5776		0	0	10970
	19	4	472.6		58	3	1210.6		2	1	1655.4							4	22	2824.2		0	22	1449.6			1	11	4138.3		74	6	5797.1		2	0	10569
	8	0	176.61		7	2	757.74		43	5	458.77							2	2	1955.4		28	9	704.7			8	12	3930.9		28	3	5455.9		43	11	9608
	1	6	246.13		5	2	776.27		1	19	465.08							14	1	2788.3		4	30	1250.7			8	22	3644.3		45	3	5237.7		110	3	9652.3
	20	1	205.78		68	19	1112.4		8	28	350.81							17	2	2985.4		12	30	823.66			13	15	3646.1		52	2	9075.4		9	15	9654.2
	15	1	217.02		70	4	1667.4		63	5	636.87							103	9	1206.1		11	21	714.65			5	19	3998.9		1	0	9949.7		9	8	10252
	2	1	170.34		76	6	766.06		11	2	1761.6							10	0	4288.8		45	37	1007.7			5	10	3627.5		2	1	9857.5		15	5	9129.1
	3	2	191.11		14	39	653.38		6	19	1303.8							16	10	678.75		101	5	1265			28	7	4279.1		0	0	10174		5	2	11167
	0	0	406.65		57	3	995.9		12	35	462.53							10	0	2665.5		9	11	1567.7			63	3	4472.4		1	0	10146		1	0	10764
	5	0	182.32		66	4	643.99		86	6	726.79							45	1	1581		8	9	840.69			15	2	4737.4		1	1	9634.7		8	1	10678
	3	0	163.37		88	6	663.28		23	19	217.62							59	0	734.75							39	1	4274.3		3	1	9914.2		8	8	9200.6
	8	3	442.21		35	2	400.43		1	1	220.97							13	1	2666.1							53	2	4371.7		0	2	9380.8		1	8	10369
	5	0	274.92		6	2	1678.3		1	3	266.05							1	7	1177.5							0	0	4225.6		51	1	7989.7		1	11	8689
	22	6	488.66		50	3	366.07		2	17	670.97							2	3	5268.2							0	0	4036.9		44	41	7559		83	3	7892
	3	0	256.39		57	8	656.01		1	13	303.91							0	0	3785.4							15	0	3897.9		42	10	8518.3		109	4	8095
	2	1	122.4		15	55	652.35		24	19	793.33							119	1	990.56							2	16	3644.7		31	5	9290.6		87	13	9624.2
	1	1	187.8		16	8	824.62		2	21	316.35							12	24	1834.2							2	11	4195		124	1	9222.1		36	2	9802.2
	1	1	164.02		32	4	675.75		10	15	423.77							0	0	2606.3							0	0	3236.9		55	1	9077.8		1	29	6781
	4	3	175.76		65	2	652.73		57	2	480.9							54	3	1747.1							4	10	3626.1		3	1	8842.3		5	21	6205
	7	2	292.82		75	3	559.81		2	31	346.24							49	5	1039.6							5	22	4000.5		21	7	6027.2		6	39	7145
	2	1	282.05		60	3	480.13		1	6	1379.7							12	22	1354.5							0	0	3569.9		50	1	7078.2		24	22	6908
	2	0	421.26		61	2	556.07		6	14	546.06							0	5	643.79							2	0	4204		69	3	7955		7	24	6880
	2	0	330.61		71	3	1073.4		3	12	325.93							18	45	2440.7							0	6	4386		67	1	7645.3		60	1	7131
	3	0	356.11		3	64	843.73		25	26	542.02							21	46	2080.6							52	4	4299.8		111	3	7786.8		50	8	7535
	3	5	331.6		63	2	487.06		8	29	279.61							11	0	4073.7							1	4	4280.4		36	4	7623.6		59	5	7100
	3	1	280.58		72	1	535.96		1	3	1733.9							91	2	1167.7							0	0	4349.6		120	3	7513.1		10	1	11574
	4	1	411.64		63	3	644.37		45	12	656.78							90	4	2219.1							39	2	4473.2		77	1	7565.4		0	0	10711
	3	2	273.44		49	2	682.8		54	14	1084.6							88	2	2494.1							10	1	4664.5		26	3	8336.3		6	3	10588
	4	0	419.89		1	1	1936.3		64	12	1310.6							0	0	2637.7							35	0	4676.5		19	1	6153.1		5	0	11218
	2	1	401.93		1	1	1722.8		56	17	724.68							11	0	4073.5							6	0	4467.4		29	1	9059.6		1	29	4270.2
	3	1	191.6		99	2	1025.9		67	11	616.72							18	0	3338.2							54	0	4702.9		27	1	7149.1		38	9	4106.8
	4	1	233.95		89	20	534.24		2	14	284							3	6	1781							23	0	4722.4		2	2	9182.9		1	37	4257.7
	5	2	298.29		6	2	777.78		0	1	1418.3							3	0	2046.9							22	0	4096.2		60	2	6821.4		47	21	4488
	3	0	179.26		236	12	580.85		0	6	509.31							1	50	1570.5							1	3	4313.5		27	2	7144.5		1	39	4528.7
	4	1	315.58		123	7	1825.7		10	8	587.89							12	45	1547.2							0	0	4640.4		3	1	6172.5		58	2	4335.9
	2	0	183.58		10	1	1853.4		1	6	582							0	1	2291.1							1	0	4468.7		1	2	5950.7		52	2	4511.7
	2	0	254.38		92	6	783.22		0	6	474.36							13	1	2485.6							2	0	4268		117	3	7509		40	13	4512
	3	1	531.38		23	37	593.16		43	7	540.46							60	0	2171.4							1	0	4273.2		54	1	7677.5		30	5	4082.4
	1	1	527.5		3	38	424.46		2	34	570.89							2	0	1282.1							2	0	3711.7		66	1	7646.7		29	1	4344.1
	4	0	586.91		54	3	1186.1		1	1	629.26							1	0	1293.7							2	0	5242.5		50	2	7678.8		8	1	4495.2
	3	1	514.15		4	2	983.9		21	1	317.81							79	2	1908.1							29	0	5554.1		69	3	6750.8		0	0	4453.4
	6	0	424.03		35	2	632.37		4	1	569.45							68	2	1968.8							6	0	4756.6		50	1	7089.1		18	0	3953.6
	3	2	351.26		56	1	365.96		0	1	618.59							146	5	2510.8							0	0	4049.6		7	21	7353		26	18	5147.2
	1	1	301.27		102	1	344.09		19	3	423.98																0	13	3970.8		2	1	9913		4	30	5721.6
	7	1	338.21		84	5	815.4		3	5	793.5																2	1	4075.2		18	0	10728		32	14	5538.5
	4	1	177.96		44	4	1350		8	25	676.65																3	0	3852.2		15	1	10990		26	11	5494.3
	1	0	273.54		44	7	496.78		56	1	513.8																1	2	4757.8		2	1	9821		12	17	5335.9
	2	6	222.5		27	2	388.02		85	1	379.35																1	0	4822.8		2	0	10679		51	1	4728.7
	4	1	317.48		19	3	468.33		3	36	393.9																1	1	4208.3		16	1	10782		62	2	5562.3
	2	1	206.58		2	10	558.34		1	0	935																5	1	4368.2		102	6	8686		43	4	5733.1
	6	0	176.91		120	2	1320.2		32	1	782																3	1	4258.8		76	2	8958		17	2	5663.4
	4	1	246.75		13	23	891.32		2	2	512.51																2	1	4925.5		148	2	9309		0	4	4753.6
	8	3	441.61		51	2	1131.1		0	5	516.21																1	0	4001.4		25	37	9388.4		15	1	5422.2
	4	0	301.3		67	2	599.47		2	3	530.62																11	0	6224.6		42	5	9472.5		0	3	4920.9
	10	3	332.02		1	23	119.25		1	2	1201.4																8	0	6648.5		4	9	9887.5		1	1	5230.8
	11	1	301.93		27	4	499.49		29	3	776.78																1	27	5827.3		34	6	9360.4		1	1	4350.5
	5	3	396.75		134	4	609.76		0	0	1523.8																2	21	4693.3		46	1	9537.1		0	1	4562.2
	24	10	502.25		70	4	565.88		1	1	1497.9																9	11	5792.8		51	3	9212		1	1	5360.3
	5	2	385.42		41	1	343.25		1	5	735.86																1	7	6732.7		77	1	8206.9		2	35	3898.1
	15	1	276.86		70	2	748.12		4	2	701.34																1	38	5673.9		79	4	10034		19	28	4286.9
	3	2	512.47		0	3	1038.5		46	3	1112.1																42	0	5747.3		72	2	8529.7		2	15	4278.7
	19	40	288.66		1	1	1545.8		21	1	823.39																10	0	5078.3		51	1	9762.8		17	5	4285.5
	1	1	419.08		22	6	245.12		39	2	1153.9																9	1	5157.6		1	2	9452.7		25	6	4300.7
	3	1	259.05		78	5	997.63		27	2	1322.9																19	2	6270.6		3	2	9965.4		39	3	4409.6
	19	0	341.25		34	2	1035.4		36	3	1005.3																8	0	5465.2		8	1	10128		1	1	4290.9
	3	0	395.49		136	4	588.04		25	1	1220.8																0	0	5322.6		21	3	8772.8		1	1	4370.7
	3	1	284.76		27	32	692.79		33	7	1033.8																3	0	4457.4		41	1	9099.1		3	11	4396.8
	14	46	280.91		31	1	1286.8		43	8	1133.8																2	0	5456.4		43	1	8668.6		14	3	4990.7
	17	1	204.22		0	5	1031.44		12	5	380.42																1	0	5430.5		34	1	9340		2	6	4721.1
	5	1	515.5		6	1	847.17		1	12	1035																5	18	4189		64	0	9383		43	16	5221.2
	2	0	284.82		2	1	1005.3		22	1	1290.9																1	20	4204.8		105	1	9383		46	4	5412.9
	1	0	214.68		95	2	769.39		8	3	1017.2																19	7	5769.4		40	1	9381		1	64	5032.5
	1	1	223.18		54	2	902.31		6	11	684.35																31	0	4423.6		72	1	8263		25	24	5260.4
	2	1	243.53		53	1	990.7		24	2	1071.1																7	5	4860.2		47	3	9347		20	6	5086.5
	2	0	210.24		172	3	664.59		0	35	395.23																32	3	4909.6		44	3	9383		49	2	4876.3
	2	0	275.88		83	2	509.23		2	32	497.35																22	2	4732.8		98	1	9383		27	2	4626.4
	2	1	139.5		84	4	620.71		28	9	897.26																37	4	5114.7		65	2	9256		2	1	4815.9
	1	1	138.75		68	4	1067.7		1	2	778.23																8	0	4493.1		58	2	9307		68	3	4434.7
	2	0	222.43		63	1	1289.2		5	1	408.51																29	0	5927.1		31	1	8484		8	1	5170.9
	3	1	139.76		145	4	981.97		10	23	180.92																5	3	5252.3		41	6	8666		2	1	4776.3
	3	0	697.82		124	4	635.63		1	2	1218.48																19	0	3757.6		23	0	9035		76	3	4919
	3	2	205.84		43	6	1210.6		1	1	1451.47																22	0	4227.3		22	4	7037		8	3	5205
	1	7	245.42		53	5	1212.7		2	29	579.85																8	22	3965.5		4	14	7661		1	35	4530.1
	1	2	510.51		17	31	1202.9		3	15	442.75																1	16	4112.9		19	4	9297		13	45	5235.5
	5	1	291.85		96	2	381.3		6	16	516.25																4	1	5659.6		3	5	9195		22	43	5028
	1	0	220.37		4	40	1276.5		3	1	616.51																35	6	5245.9		22	5	8817		3	34	5007.7
	1	1	222.02		29	2	666.66		3	2	1297.6																39	9	6043.6		55	1	9510		4	16	4853.3
	15	1	376.7		22	44	752.39		2	2	462.46																19	0	6011.3		59	0	9412		7	5	4352.1
	3	2	254.9		79	3	864.36		35	1	640.32																23	1	5484.1		30	12	8481		52	2	4439.3
	7	25	331.7		0	3	1062.9		2	4	691.9																32	0	5692		26	8	8461		4	2	4649
	6	1	252.01		14	3	1222.7		2	5	688.48																9	22	5675.4		38	1	8498		3	0	4351.4
	4	1	317.4		8	1	1467.1		42	3	531.38																38	11	5797.2		57	1	9429		0	2	4865.1
	3	0	475.26		131	4	566.93		18	1	458.95																27	3	5826.3		33	2	8543		34	1	4578.2
	2	1	475.02		11	7	2155.1		5	31	251.07																29	9	5321.2		35	0	9257		36	3	4798.8
	32	1	393.85		71	2	602.88		19	35	501.66																32	6	5790.7		12	17	9614		22	43	3844
	5	2	352.52		85	3	837.94		0	32	285.87																35	1	4512.8		98	0	9509		4	29	3456.2
	7	2	351.54		4	2	1327.1		7	19	806.9																4	0	5595.4		51	0	8697		4	45	3205.4
	4	1	335.6		36	3	1003.8		13	3	311.43																36	1	4212.7		21	9	9410.5		1	10	2946.2
	3	0	346.92		90	2	902.43		6	5	541.07																33	15	5614.7		2	22	8763.4		17	7	3712.8
					38	4	411.98		38	1	733.26																46	0	5916.2		0	19	9191.6		19	17	3599
					50	1	1051.3		1	3	947.74																70	8	6426.1		32	32	9058.4		1	7	3620.9
					8	2	1622.9		6	1	331.25																34	0	5981.4		23	4	10056		40	9	3671.8
					8	2	1903		3	2	298.7																38	0	5921		20	16	8960.9		2	9	6993.8
					234	3	334.26		17	1	814.59																1	0	5717		2	4	10157		11	5	7340.8
					21	10	1010.1		13	39	369.77																29	8	6622.3		58	23	8573.7		35	15	7847.8
					77	3	541.01		21	32	276.38																13	0	6383.6		92	9	8546.2		34	32	7700.2
					29	1	2166.4		5	14	172.65																14	0	6744		69	0	9750.7		27	15	6812.5
					77	2	661.08		6	25	191.14																29	1	6988.9		52	7	9170.1		37	4	7285.5
					89	3	705.63		26	10	673.35																22	0	6543		62	3	9546.6		4	31	6410.7
					24	27	916.02		104	5	1116.3																13	0	6167.6		57	1	9858.3		5	38	6410.2
					74	3	541.88		2	2	1338.3																22	2	6275.8		54	7	9789.6		21	53	6726.7
					86	2	757.98		5	14	174.26																2	13	6405.9		78	1	6169.4		39	14	6997.8
					81	2	583.1		6	29	190.86																4	16	6844.4		120	1	8550.8		31	11	6754.4
					62	2	725.26		4	16	269.16																21	1	7005.1		94	2	9374.1		19	9	6471.3
					1	32	665.11		67	11	833.59																19	3	7019.2		56	1	6445.7		28	13	6759.5
					102	2	879.76		136	9	402.22																9	4	7581.7		61	2	9418.1		1	42	6452.6
					54	2	906.32		40	4	303.82																9	0	7074.9		4	14	5491.8		80	11	6399.1
					120	2	936.2		20	5	549.8																5	0	8188.8		26	17	8649.4		2	22	6893.5
					66	5	881.22		30	7	744.93																0	0	5303.4		14	11	7786.4		45	6	5850.7
					109	4	685.06		47	4	703.14																0	0	7445.1		42	0	5585		29	3	6145.6
					29	2	1691.2		34	7	442.99																2	0	8333.9
					30	7	1884.5		11	23	197.33																52	1	4399.4
					109	2	1007.1		12	17	280.36																32	0	4368
					67	3	750.63		1	18	282.87																44	0	4940.9
					63	2	998.72																				5	16	4112.3
					60	5	469.08																				0	0	4382.2
					2	33	703.16
					77	3	843.2
					75	2	723.04
					64	4	866.9
					36	2	1094.3
					22	1	1542.3
					12	1	2019.9
					23	39	1823.2
					4	1	1951.5
					2	1	2086.3
					16	2	985.89
					53	1	1007.7
					33	2	984.9
					4	2	2081.7
					8	3	1994.5
					5	2	1843.5
					80	3	1253
					39	3	1154.4
					3	23	597.06
					49	2	403.61
					38	2	507.45
					139	2	751.47
					5	14	624.61
					2	13	1965
					72	3	558.98
					63	3	699.67
					51	8	994.36
					171	4	1191.1
					41	15	1419.9
					5	5	1967.4
					5	2	1527.3
					46	4	1860.6
					4	2	1037.8
					1	41	923.3
					49	5	672.92
					2	2	1639.1
					2	34	806.5
					50	1	1052.9
					158	5	949.43
					115	9	859.38
					92	7	826.08
					92	5	724.42
					133	6	914.65
					24	3	1793.8
					6	4	1553.3
					51	2	740.29
					45	4	1791.8
					19	30	311.44
					103	4	700.06
					2	1	1513
					1	3	1261.3
					52	49	765.93
					84	4	657.73
					88	2	642.52
					65	3	798.32
					3	2	1718.1
					18	1	1586.7
					9	3	1354.2
					3	1	1840.3
					84	4	1621.4
					2	1	315.87
					4	1	300.63
					103	6	690.45
					59	2	766.21
					58	3	836.37
					1	4	324.09
					58	3	832.69
					1	4	239.1
					2	2	224.61
					4	1	1821.1
					1	1	1649.8
					11	1	1833.2
					82	7	1118.1
					83	7	1228.2
					39	4	712.52
					5	69	522
					11	32	523.44
					2	5	274.54
					3	2	267.4
					1	3	390.9
					1	2	302.67
					92	4	713.42
					131	2	620.21
					102	2	441.1
					19	1	2717.6
					4	4	1859.9
					1	1	1764.2
					82	13	567.15
					3	2	259.84
					19	32	411.54
					45	6	702.46
					108	8	745
					154	7	722.7
					51	2	773.27
					15	2	859.45
					15	5	1878.7
