# Supplementary material for: Ligand-dependent enhancer activation indirectly modulates non-target promoters in a chromatin domain
Source: eLife. 2026 Jul 7;13:RP102417. doi: 10.7554/eLife.102417 (PMC13341115; doi:10.7554/eLife.102417)
Supplement: Figure 5—figure supplement 1—source data 1. [file elife-102417-fig5-figsupp1-data1.xlsx]

## Sheet: SUPP_5A
Repeat1							Repeat2
Control	InTFF1	InTFF3	3%Hexanediol	InTFF1	InTFF3		Control	InTFF1	InTFF3	3%Hexanediol	InTFF1	InTFF3
	1	0		5	0			1	0		2	6
	21	3		13	2			2	0		5	7
	19	1		8	1			1	2		1	4
	3	0		2	1			5	0		11	1
	1	0		1	9			2	14		6	2
	2	4		0	0			2	6		4	0
	2	21		5	0			2	0		6	14
	11	8		18	7			2	7		17	0
	15	1		2	3			19	1		2	6
	5	0		0	0			18	7		8	15
	12	0		5	1			4	0		8	0
	16	0		5	2			3	0		9	1
	14	3		1	2			2	1		2	1
	1	0		0	0			15	3		19	1
	6	0		2	4			3	0		1	1
	6	1		2	4			0	0		2	8
	5	0		2	0			4	0		2	3
	8	0		0	0			0	0		5	3
	55	1		2	0			2	0		2	14
	8	3		3	1			3	1		2	0
	1	3		1	2			0	0		16	1
	4	4		3	3			3	4		16	1
	3	5		1	0			1	0		28	2
	21	0		1	1			2	0		1	6
	2	9		5	8			3	1		9	1
	1	1		3	4			3	3		17	1
	25	4		1	1			3	0		13	1
	2	3		2	1			1	0		1	4
	1	2		1	0			1	0		0	0
	9	0		0	0			10	0		2	17
	38	5		1	1			37	1		9	2
	38	0		5	14			4	0		14	8
	13	2		2	2			15	1		6	4
	22	11		5	9			1	16		13	1
	0	0		1	3			13	0		11	6
	28	1		1	13			0	1		1	13
	1	2		1	26			1	1		13	1
	0	0		3	11			5	0		2	6
	1	0		6	1			8	1		12	1
	4	1		1	1			6	3		14	3
	4	0		4	11			4	1		12	16
	1	0		5	6			20	0		3	2
	16	43		2	1			2	0		4	1
	16	3		6	1			17	9		11	2
	42	11		8	2			3	1		9	1
	0	0		1	15			2	1		2	4
	4	3		1	1			8	0		3	9
	1	1		1	1			11	1		2	11
	2	2		1	9			2	1		5	8
	0	0		33	6			11	0		3	7
	29	2		1	3			1	0		12	3
	1	0		11	2			0	0		11	1
	1	0		4	1			7	0		1	3
	26	2		22	11			2	0		13	34
	13	1		6	5			23	1		5	26
	2	0		1	15			12	0		20	3
	7	0		2	1			1	0		2	1
	34	2		1	7			54	2		4	1
	28	1		3	13			17	1		11	17
	38	1		12	3			4	1		51	11
	0	0		32	0			11	11		9	1
	14	1		3	1			6	1		14	4
	8	0		5	2			2	3		9	1
	0	1		4	23			19	1		27	4
	0	0		3	1			22	1		16	4
	0	0		5	1			0	1		2	1
	2	2		1	1			2	2		2	6
	0	0		1	1			4	0		10	5
	2	0		1	7			0	0		3	1
	3	0		20	37			6	1		5	4
	6	13		34	2			1	1		3	4
	18	4		7	1			2	1		12	3
	26	6		9	0			1	0		7	3
	7	1		16	4			1	3		49	2
	0	0		2	1			1	9		2	9
	0	0		4	16			0	0		29	0
	2	0		14	4			0	1		4	4
	2	1		12	3			6	0		1	6
	1	0		19	2			7	0		4	11
	3	3		18	3			8	1		2	4
	3	0		24	0			9	0		1	0
	3	0		18	1			19	11		10	0
	4	6		1	3			15	0		8	2
	24	11		43	1			3	1		8	0
	1	0		2	1			0	0		0	0
	2	0		4	0			1	0		1	1
	4	4		3	1			3	2		4	13
	0	0		9	4			1	8		15	0
	4	0		6	1			32	3		9	16
	0	0		4	1			2	1		2	9
	3	0		2	6			14	0		11	0
	11	0		2	5			16	32		5	2
	1	7		3	12			6	5		17	1
	40	2		31	7			2	1		27	2
	42	4		2	3			0	0		7	2
	2	0		1	5			12	1		0	0
	1	0		14	0			4	0		1	6
	6	8		1	1			14	6		2	0
	1	1		13	7			9	1	MEAN	8.5102	4.67347
	8	1		27	6			1	1	STDEV	8.95377	5.79508
	2	0		42	4			27	4
	23	22		8	9			1	2
	11	1		40	3			5	0
	2	0		27	5			11	1
	19	0		5	4			1	0
	22	0		18	9			3	1
	48	7		13	1			2	11
	0	0		6	2			10	2
	4	0		1	8			2	2
	15	0		14	28			11	0
	14	12		27	8			5	16
	15	4		12	1			21	12
	46	4		30	15			10	2
	39	4		5	12			2	1
	24	2		28	1			1	1
	2	14		6	1			16	2
	7	1		5	8			2	1
	2	1		12	0			0	3
	8	0		7	0			41	2
	2	1		10	0			14	2
	7	0		8	16			17	0
	4	0		5	8			1	1
	2	0		12	19			3	3
	0	0		4	0			11	1
	0	0		3	1			13	7
	2	4		4	2			30	3
	3	0		5	22			2	1
	14	1		18	7			1	1
	2	0		1	1			25	1
	2	2		4	1			16	4
	1	3		2	1			7	13
	4	0		6	5			5	9
	2	0		49	1			12	0
	43	1		14	1			1	4
	0	0		16	19			1	4
	2	1		11	7			10	1
	6	0		18	8			1	9
	4	3		7	6			1	1
	7	3		4	1			7	4
	3	36		24	2			2	0
	1	1		25	1			4	1
	5	1		1	11			6	2
	4	0		2	24			1	11
	1	1		14	1			31	4
	6	6		10	4			29	2
	2	7		3	4			6	0
	0	0		2	2			49	7
	29	4		1	1			20	3
	6	0		3	0			16	16
	23	13		1	1			3	0
	0	0		2	0			9	0
	73	1		2	0			5	1
	2	0		17	8			4	0
	43	1		3	12			4	1
	3	0		2	1			4	0
	2	14		21	17			34	1
	17	47		2	1			7	1
	3	1		1	3			11	0
	1	0		6	1			4	7
	6	1		14	1			2	4
	47	1		13	2			12	1
	11	5		1	10			2	1
	9	0		2	4			29	3
	16	2		4	12			10	1
	0	0		20	4			3	4
	0	0		13	12			8	0
	17	1		24	7			5	1
	39	1		4	3			19	2
	1	0		24	1			26	0
	8	0		12	1			10	4
	4	46		23	2			35	9
	2	0		1	7			2	1
	9	3		4	1			29	1
	16	2		17	18			2	32
	4	0		1	9			40	0
	5	3		1	21			12	9
	16	14		3	19			38	0
	33	1		23	21			27	1
	29	0		1	3			0	0
	2	4		4	0			6	9
	2	0		2	0			8	0
	1	2		1	1			21	0
	29	3		21	2			15	4
	28	1		8	3			6	0
	17	4		2	3		MEAN	8.88587	2.60326
	8	0		3	6		STDEV	10.3323	4.62946
	8	21		3	2
	4	1		1	0
MEAN	10.367	3.12234		9	0
STDEV	13.2269	7.09077		8	2
				28	5
				6	0
				1	1
				1	1
				3	28
				9	4
				13	15
				1	1
				22	1
				20	11
				3	0
				2	45
				2	3
				2	0
				5	1
				4	8
				20	6
				13	3
				2	0
				16	2
				12	2
				20	4
				5	24
				28	1
				11	0
				13	27
				1	1
				11	4
				22	4
				1	0
				4	1
				1	1
				13	9
				35	4
				2	15
				7	8
				8	6
				14	0
				16	2
				11	14
				21	0
				49	0
				1	0
				29	6
				14	2
				14	9
				22	24
				6	47
				18	0
				0	0
				0	0
				2	1
				2	1
			MEAN	8.9177	5.32922
			STDEV	9.82162	7.47051
