# Supplementary material for: Ligand-dependent enhancer activation indirectly modulates non-target promoters in a chromatin domain
Source: eLife. 2026 Jul 7;13:RP102417. doi: 10.7554/eLife.102417 (PMC13341115; doi:10.7554/eLife.102417)
Supplement: Figure 5—source data 1. [file elife-102417-fig5-data1.xlsx]

## Sheet: 5A
Repeat1							Repeat2							Repeat3
Control	InTFF1	InTFF3	3%Hexanediol	InTFF1	InTFF3		Control	InTFF1	InTFF3	3%Hexanediol	InTFF1	InTFF3		Control	InTFF1	InTFF3	3%Hexanediol	InTFF1	InTFF3
	22	3		3	2			24	0		2	4			52	2		1	1
	28	1		4	2			31	5		3	3			16	0		31	1
	5	0		11	4			43	1		2	1			4	0		1	4
	42	1		3	3			94	3		21	17			56	6		3	1
	11	2		50	14			58	2		2	15			4	1		2	1
	62	1		2	2			13	1		2	1			70	2		9	3
	6	1		2	2			19	1		4	0			2	2		29	4
	31	0		18	1			59	1		29	4			29	4		1	2
	2	0		3	4			30	2		14	5			12	1		5	2
	45	1		3	11			36	0		1	2			47	1		2	4
	0	0		0	0			69	5		9	1			22	0		11	6
	11	1		3	39			75	2		26	9			33	1		30	1
	6	2		2	29			51	3		57	11			51	5		2	2
	24	1		1	8			71	3		3	1			133	4		1	1
	7	6		6	4			88	1		6	4			30	0		3	0
	14	1		2	47			15	0		10	0			35	2		2	3
	19	22		1	10			81	2		16	18			11	0		36	2
	13	0		15	5			9	12		34	5			45	1		3	1
	25	15		1	5			75	5		9	3			31	1		3	1
	1	0		4	1			16	12		6	1			59	1		7	2
	3	0		22	1			122	4		11	2			14	4		16	19
	4	18		10	8			20	1		2	0			70	0		14	2
	40	6		37	2			133	2		21	1			13	15		15	1
	5	7		1	3			41	2		8	7			49	0		3	2
	21	1		46	2			40	3		9	2			57	4		34	12
	5	14		6	2			43	1		4	5			32	10		31	1
	86	3		2	2			21	2		4	1			35	0		6	2
	32	1		48	8			65	2		2	3			45	0		6	22
	36	2		2	3			54	2		19	18			136	1		11	2
	23	1		4	1			89	1		11	1			29	0		25	2
	22	7		5	1			4	11		33	29			32	1		1	1
	11	2		12	2			125	7		18	7			8	0		16	3
	39	8		3	0			44	2		18	21			66	2		6	12
	1	2		1	1			63	2		13	4			3	12		12	2
	48	3		1	3			32	1		7	2			35	3		17	1
	115	3		5	21			17	3		0	0			61	3		2	55
	24	9		3	11			29	1		7	2			20	0		4	1
	91	1		1	9			22	1		3	1			7	11		9	1
	4	7		1	1			24	2		0	1			50	0		3	3
	3	19		18	13			40	3		11	0			22	2		29	3
	61	4		3	9			94	8		4	2			11	0		5	4
	6	15		1	13			65	4		4	16			53	1		11	5
	17	3		3	9			172	4		11	1			17	0		3	1
	13	4		2	11			97	2		16	4			44	1		11	1
	38	2		14	1			71	3		18	1			21	1		4	0
	42	3		8	2			49	2		2	2			12	4		15	1
	99	1		67	1			82	2		2	4			17	12		24	4
	55	0		31	2			127	2		6	1			41	2		10	1
	1	27		29	3			123	3		16	29			38	1		1	1
	1	1		14	5			178	4		4	1			19	1		22	3
	23	16		33	3			53	0		47	2			22	1		19	1
	42	3		6	1			146	3		2	0			68	1		17	8
	3	0		10	2			52	2		1	17			24	2		36	11
	34	28		2	1			119	3		12	1			35	4		15	12
	286	8		1	1			87	6		7	2			23	9		6	2
	0	0		3	1			86	2		6	0			9	0		2	4
	28	5		6	2			66	2		4	1			2	15		3	1
	46	3		1	1			153	5		9	0			33	1		11	18
	7	3		50	35			18	2		7	1			61	1		2	1
	46	3		2	9			60	3		4	27			32	6		2	1
	21	3		3	10			12	1		3	1			57	2		11	5
	1	8		5	19			42	0		4	1			54	1		9	2
	33	2		11	1			17	1		37	42			40	2		11	2
	52	7		44	2			2	6		22	7			66	9		27	14
	71	0		8	3			98	1		6	2			15	3		41	24
	44	0		67	3			16	13		7	4			33	1		4	1
	14	14		31	4			23	1		3	2			18	28		1	14
	12	2		33	1			21	24		4	3			106	2		1	2
	68	3		1	1			33	1		22	2			44	1		29	2
	15	1		4	2			54	3		27	3			88	2		1	1
	17	0		16	1			29	2		14	0			54	1		8	3
	15	5		6	0			42	0		2	1			63	7		1	23
	19	0		17	1			25	1		11	2			54	2		8	2
	45	1		2	1			38	2		2	14			78	2		45	3
	63	2		2	8			31	1		25	16			71	1		5	4
	88	6		2	1			6	8		2	2			61	7		26	3
	28	2		4	7			47	2		1	2			57	1		8	5
	26	8		3	1			15	9		2	2			68	2		1	1
	11	17		1	35			83	3		3	0			41	0		5	1
	23	1		4	12			93	1		6	14			42	3		0	0
	55	2		3	2			133	3		59	6			23	8		3	1
	14	0		5	12			36	17		7	1			41	1		17	1
	2	0		21	22			5	16		5	1			72	2		2	17
	75	3		37	1			79	3		8	0			39	0		6	1
	28	0		10	11			95	2		18	7			11	6		2	3
	53	1		20	0			34	2		16	12			31	2		22	1
	30	2		2	38			11	1		33	3			19	1		6	2
	5	2		5	6			7	0		5	0			4	0		2	7
	60	3		3	6			26	1		6	1			12	0		6	3
	107	7		9	8			12	14		3	8			31	0		8	1
	42	2		33	4			1	1		10	1			55	1		26	3
	23	1		18	1			2	4		15	3			45	1		14	2
	63	4		16	1			5	0		2	11			23	2		9	7
	11	2		19	2			69	2		9	27			21	2		1	19
	28	5		3	0			6	1		12	3			16	2		21	1
	16	1		6	1			28	2		38	15			42	2		20	2
	5	5		73	5			32	9		11	2			15	1		4	5
	131	3		1	1			16	16		4	1			67	3		15	4
	34	0		4	2			23	28		3	16			26	3		3	7
	42	0		2	1			20	18		1	2			18	3		17	4
	13	4		1	3			42	8		17	3			16	3		3	3
	15	14		36	50			18	4		16	3			36	1		12	1
	7	15		11	11			76	2		7	19			16	0		27	5
	28	6		16	1			129	4		4	2			29	3		20	1
	20	1		9	1			133	2		23	0			3	17		6	1
	1	4		17	34			27	2		6	1			29	2		8	1
	56	3		11	19			65	1		2	3			11	1		8	6
	22	15		7	20			19	1		11	4			8	22		12	7
	34	0		10	34			3	0		6	1			18	1		3	5
	20	8		21	1			2	1		2	5			32	1		1	18
	48	5		19	2			114	4		8	1			16	8		2	41
	31	2		9	1			30	3		17	0			42	3		12	20
	39	4		9	5			9	1		14	6			1	4		11	8
	62	6		16	1			76	4		6	4			41	2		17	9
	9	9		25	10			74	1		6	1			45	1		16	1
	29	1		36	25			14	1		41	38			27	4		1	3
	63	1		44	2			14	2		6	2			47	1		27	2
	5	0		19	1			27	1		2	5			14	8		14	3
	54	0		3	1			22	1		10	2			86	1		1	2
	15	10		4	12			41	2		7	24			119	1		15	1
	35	4		21	2			64	3		15	7			30	1		33	4
	10	5		11	3			85	1		28	17			18	29		22	5
	16	2		4	21			29	3		20	28			49	1		34	9
	0	0		1	7			140	4		21	22			51	9		1	26
	2	0		4	6			58	3		2	5			61	3		18	28
	2	0		29	14			8	1		19	1			32	2		12	3
	7	0		0	0			57	2		9	0			44	1		1	16
	8	0		13	2			22	2		1	44			51	1		13	1
	3	0		14	2			49	2		4	2			9	6		25	2
	11	2		8	2			45	4		15	3			35	0		3	4
	37	0		1	29			24	0		25	24			28	2		18	4
	40	4		2	34			67	3		13	21			19	6		48	1
	27	3		2	11			77	4		6	1			67	2		44	7
	29	0		2	7			13	2		1	6			99	1		54	3
	25	1		1	15			11	1		1	3			48	3		13	3
	38	9		23	20			6	1		15	1			39	7		4	5
	42	7		12	1			112	3		11	5			48	2		5	2
	31	17		1	0			39	1		4	3			59	2		5	1
	13	5		9	3			55	2		6	5			42	0		2	20
	25	8		4	7			5	0		15	2			45	1		16	6
	28	0		3	3			2	1		29	22			6	19		9	2
	31	0		14	2			9	1		19	21			69	8		7	42
	112	7		20	6			6	0		12	3			57	2		13	1
	63	3		18	2			19	1		8	0			64	3		4	7
	4	1		4	2			3	0		3	1			6	2		2	1
	18	12		24	4			5	1		5	7			17	1		3	6
	180	3		9	1			2	1		2	0			95	3		13	2
	3	5		49	1			18	0		2	6			33	2		46	8
	56	0		18	29			4	1		11	4			38	5		13	2
	27	2		1	1			5	0		9	7			77	7		10	2
	12	0		57	5			2	1		15	23			37	1		11	2
	6	1		32	25			6	1		3	1			41	1		19	3
	11	0		6	22			11	1		7	2			29	1		13	3
	15	13		20	2			33	2		7	5			47	3		19	24
	19	1		2	2			69	1		35	18			51	8		3	3
	35	2		35	7			6	9		2	7			48	2		3	1
	74	3		3	3			29	11		9	2			32	1		28	15
	21	2		19	2			76	2		4	1			2	12		2	2
	34	2		13	6			2	6		6	0			56	1		9	20
	30	1		4	0			55	2		7	4			29	9		36	12
	25	3		10	1			38	2		2	4			80	2		6	2
	31	1		7	3			11	0		11	21			94	4		33	4
	36	0		25	2			25	1		2	7			64	1		1	4
	16	22		6	1			19	2		7	6			62	0		8	1
	34	0		20	8			48	2		8	1			32	0		38	2
	37	2		3	6			44	2		21	25			88	3		1	1
	0	0		6	7			8	0		23	58			29	0		7	2
	8	1		26	2			14	12		9	19			17	3		22	7
	7	0		18	7			22	4		2	2			40	1		21	11
	51	8		9	22			19	2		4	0			24	9		31	12
	141	3		57	4			2	7		4	3			36	1		3	21
	9	0		3	45			29	19		1	16			29	0		11	2
	74	0		1	15			58	1		9	4			24	0		9	3
	49	0		9	57			82	6		6	23			20	16		2	22
	52	1		2	1			52	2		10	3			44	2		13	19
	66	5		26	4			32	2		32	2			31	4		8	3
	6	2		5	2			33	11		16	0			29	7		6	2
	5	1		10	7			14	5		18	2			50	5		7	6
	95	3		31	14			38	7		11	1			40	1		4	2
	18	27		21	2			1	8		9	5			135	4		14	1
	34	1		4	4			18	12		20	3			36	1		4	1
	51	1		24	6			20	25		4	13			19	1		4	3
	31	0		4	9			12	13		3	12			18	2		46	2
	49	5		1	3			34	18		14	12			6	20		8	11
	11	0		18	2			42	2		50	2			21	11		9	2
	34	2		0	0			63	2		3	2			32	31		6	1
	33	2		10	1			19	4		19	2			63	4		2	1
	5	2		11	1			11	14		10	3			51	2		3	0
	32	1		5	5			14	12		6	5			49	2		2	4
	69	8		2	1			79	3		15	2			98	2		23	0
	20	0		33	2			22	12		8	8			50	4		13	2
	15	22		25	26			28	13		9	11			43	2		31	3
	79	4		3	1			45	3		13	9			51	4		6	12
	93	4		2	1		MEAN	44.0881	3.90155		7	1			41	9		21	3
	33	2		7	1		STDEV	37.8123	4.88041		5	7			51	2		2	1
	33	1		20	1						22	0			9	0		1	5
	25	24		21	14						11	9			23	1		9	1
	41	9		1	1						18	62			10	3		14	2
	38	4		8	1						2	9			9	7		1	1
	55	3		12	7						5	1			19	16		5	2
	32	1		14	1						7	2			4	11		1	1
	18	13		4	6						11	14			13	7		10	29
	45	1		11	12						10	4			20	22		1	2
	50	3		79	12						6	4			62	4		7	1
	55	0		2	1						2	1			166	4		2	17
	31	19		12	1						13	3			78	3		1	11
	65	14		1	1						17	0			95	11		7	4
	7	0		3	13						25	1			39	2		41	2
	82	5		37	16						35	22			41	2		22	4
	32	2		18	2						2	24			40	1		2	5
	41	2		3	0						3	18			76	2		5	0
	86	2		9	1						31	3			97	3		15	3
	66	0		7	4						4	2			98	2		1	3
	24	0		5	5						36	3			94	8		15	2
	55	1		2	2						9	2			24	1		18	1
	32	1		25	3						7	20			29	2		3	29
	26	3		3	2						7	3			13	7		1	13
	66	3		5	11						5	0			47	2		19	28
	32	0		5	63						11	2			19	4		14	1
	19	0		22	2						5	1			14	2		50	23
	11	12		5	4						2	0			29	1		6	1
	4	19		35	2						38	2			4	35		21	1
	45	1		22	1						1	7			94	3		6	4
	28	0		4	10						2	7			34	2		2	1
	50	1		2	0						2	26			48	2		6	4
	23	0		14	3						11	19			78	3		2	24
	64	1		6	5						9	1			62	4		8	2
	166	2		12	9						26	11			38	11		8	1
	61	1		38	5						9	0			76	1		16	4
	28	4		11	29						7	48			33	8		10	2
	82	10		21	1						17	2			1	10		15	4
	22	0		3	3						11	0			60	2		3	59
	73	2		37	24						2	9			7	1		40	84
	33	14		8	1						2	16			8	0		5	12
	61	1		6	1						20	6			32	18		15	9
	37	5		3	1						7	2			20	1		20	15
	50	0		26	23						2	1			85	4		13	2
	53	1		30	1						7	3			30	1		30	1
	12	0		42	8						20	8			8	8		6	3
	33	8		1	4						21	1			18	35		1	4
	55	2		2	1						33	1			3	14		35	0
	22	0		3	3						12	2			20	22		9	2
	10	17		1	22						13	0			58	12		5	1
	93	3		6	24						2	3			65	5		23	2
	1	15		21	0						6	1			62	4		3	1
	60	9		3	1						18	36			107	3		4	4
	144	2		29	5						22	2			90	4		37	2
	156	0		22	24						15	1			77	3		1	3
	14	0		2	0						9	2			17	12		18	6
	271	3	MEAN	12.9558	7.43373						11	1			48	1		5	1
	5	1	STDEV	14.4745	10.5217						2	13			60	2		3	6
	245	5									11	2			81	2		11	18
	138	3									2	44			31	2		2	1
	147	8									9	0			43	1		12	1
	110	2									11	2			60	2		2	12
	24	1									27	2			15	3		3	5
	55	1									21	13			5	6		9	1
	31	2									2	1			8	12		14	5
	0	0									20	1			31	9		1	8
	12	14									19	2			12	16		26	23
	100	3									1	12			8	19		14	2
	38	2									3	4			73	12		14	1
	23	0									2	18			69	2		15	3
	11	0									2	5			65	9		22	2
	91	4									21	1			53	2		1	2
	45	1									24	5			80	2		41	1
	13	3									25	1			40	2		8	1
	2	0									7	0			51	1		26	8
	3	0									5	0			33	1		25	6
	9	3									7	1			54	2		8	1
	94	2									2	5			53	2		1	1
	115	6									18	13			50	1		12	16
	55	14									9	1			14	17		5	2
	30	2									8	6			51	1		11	4
	28	2									9	0			20	4		3	0
	47	0									8	5			25	1		5	1
	29	5									2	17			19	0		34	1
	5	2									11	17			29	2		12	2
	46	8									3	36			35	2		3	1
	54	1									15	1			32	2		1	1
	3	0									7	1			86	1		17	14
	31	8									6	26			2	11		4	1
	3	1									6	4			8	9		13	1
	3	15									5	6			45	2		17	1
	37	1									2	33			56	1		7	2
	65	0									4	1			95	4		13	29
	29	3									19	0			19	0		39	2
	49	2								MEAN	10.9791	7.11847			50	6		30	7
	60	1								STDEV	10.037	10.0387			36	1		23	2
	11	0													112	2		1	6
	52	1												MEAN	41.1379	4.23793		7	1
	24	2												STDEV	27.7534	5.75226		2	12
	36	2																15	1
	49	6																21	8
	44	11																4	18
	33	2																14	0
	24	2																0	11
	2	40																9	0
	29	0																1	6
	1	1																12	1
	176	4																7	4
	123	1																17	41
	0	0																22	39
	0	0																5	26
	69	2																23	13
	66	8																15	14
	19	0																32	4
	33	1																26	1
	35	2																6	5
	22	1																21	1
MEAN	38.6323	4.02581																1	0
STDEV	39.7252	5.69215																14	1
																		13	4
																		9	1
																		22	2
																		2	0
																		11	3
																		5	1
																		52	3
																		16	1
																		33	27
																		43	21
																		2	18
																		14	17
																		13	24
																		20	4
																		24	5
																		13	5
																		2	3
																		5	7
																		28	3
																		13	1
																		6	4
																		36	4
																		3	17
																		2	41
																		21	1
																		9	11
																		55	43
																		15	8
																		19	11
																		33	6
																		19	14
																		31	3
																		2	18
																		2	14
																		46	7
																		11	3
																	MEAN	12.7931	6.61782
																	STDEV	11.7989	9.82647
